# Supplementary material
Source: MDPI journal article supplement (https://www.mdpi.com/1996-1073/9/7/488)
Supplement: s1 [file s1]

## Sheet: Andres
	Coal	Low Temperature Heat 1	Low Temperature Heat 2	Low Temperature Heat 3		High Temperature Heat	Medium Temperature Heat	Low Temperature Heat	Mechanical Drive	Non-energy uses	Heat	Mechanical Drive		Oil	Low Temperature Heat 1	Low Temperature Heat 2	Low Temperature Heat 3	Mechanical Work 1	Mechanical Work 2	Mechanical Work 3	Diesel Electric	Navigation	TJ	High Temperature Heat	Medium Temperature Heat	Low Temperature Heat	Mechanical Drive	Light	Heat	Mechanical Drive	Light		Natgas	Low Temperature Heat 1	Low Temperature Heat 2	Low Temperature Heat 3		High Temperature Heat	Medium Temperature Heat	Low Temperature Heat	Mechanical Drive	Non-energy uses	Heat	Mechanical Drive		CombustRen	Low Temperature Heat 1	Low Temperature Heat 2	Low Temperature Heat 3
1856	1856	0	0	3243.6	3816	190.8	381.6	3243.6	0	0	180.731	0	180.731	1856	0	0	0	0	0	0	0	0		0	0	0	0	0	0	0	0	0	1856	0	0	0		0	0	0	0	0	0	0	0	1856	555	0	45288
1857	1857	0	0	2300.2		148.4	296.8	2300.2	222.6	0	135.281	5.57997	140.861	1857	0	0	0	0	0	0	0	0		0	0	0	0	0	0	0	0	0	1857	0	0	0		0	0	0	0	0	0	0	0	1857	499.5	0	45621
1858	1858	0	0	2528.1		174.9	349.8	2528.1	445.2	0	153.743	11.1899	164.933	1858	0	0	0	0	0	0	0	0		0	0	0	0	0	0	0	0	0	1858	0	0	0		0	0	0	0	0	0	0	0	1858	499.5	0	45288
1859	1859	0	0	2936.2		212	424	2936.2	667.8	0	179.949	16.8297	196.778	1859	0	0	0	0	0	0	0	0		0	0	0	0	0	0	0	0	0	1859	0	0	0		0	0	0	0	0	0	0	0	1859	499.5	0	45732
1860	1860	0	0	1992.8		169.6	339.2	1992.8	890.4	0	132.949	22.4994	155.448	1860	0	0	0	0	0	0	0	0		0	0	0	0	0	0	0	0	0	1860	0	0	0		0	0	0	0	0	0	0	0	1860	499.5	0	45843
1861	1861	0	0	1319.7		143.1	286.2	1319.7	1113	0	98.4006	28.1991	126.6	1861	0	0	0	0	0	0	0	0		0	0	0	0	0	0	0	0	0	1861	0	0	0		0	0	0	0	0	0	0	0	1861	499.5	0	46176
1862	1862	0	0	1187.2		148.4	296.8	1187.2	1335.6	0	95.765	33.9287	129.694	1862	0	0	0	0	0	0	0	0		0	0	0	0	0	0	0	0	0	1862	0	0	0		0	0	0	0	0	0	0	0	1862	499.5	0	46620
1863	1863	0	0	1054.7		153.7	307.4	1054.7	1558.2	0	93.7457	39.6883	133.434	1863	0	0	0	0	0	0	0	0		0	0	0	0	0	0	0	0	0	1863	0	0	0		0	0	0	0	0	0	0	0	1863	555	0	47064
1864	1864	0	0	922.2		159	318	922.2	1780.8	0	91.6434	45.4778	137.121	1864	0	0	0	0	0	0	0	0		0	0	0	0	0	0	0	0	0	1864	0	0	0		0	0	0	0	0	0	0	0	1864	555	0	47175
1865	1865	0	0	789.7		164.3	328.6	789.7	2003.4	0	88.3484	51.2972	139.646	1865	0	0	0	0	0	0	0	0		0	0	0	0	0	0	0	0	0	1865	0	0	0		0	0	0	0	0	0	0	0	1865	555	0	47397
1866	1866	0	0	2098.8		254.4	508.8	2098.8	2226	0	167.586	57.1465	224.733	1866	0	0	0	0	0	0	0	0		0	0	0	0	0	0	0	0	0	1866	0	0	0		0	0	0	0	0	0	0	0	1866	610.5	0	47841
1867	1867	0	0	1335.6		222.6	445.2	1335.6	2448.6	0	126.111	63.0258	189.137	1867	0	0	0	0	0	0	0	0		0	0	0	0	106	0	0	0.0315702	0.0315702	1867	0	0	0		0	0	0	0	0	0	0	0	1867	610.5	0	48063
1868	1868	0	0	2464.5		302.1	604.2	2464.5	2671.2	0	198.497	68.935	267.432	1868	0	0	0	0	0	0	0	0		0	0	0	0	106	0	0	0.0315646	0.0315646	1868	0	0	0		0	0	0	0	0	0	0	0	1868	610.5	0	48285
1869	1869	0	0	620.1		206.7	413.4	620.1	2893.8	0	97.6675	74.8741	172.542	1869	0	0	0	0	0	0	0	0		0	0	0	0	212	0	0	0.0636718	0.0636718	1869	0	0	0		0	0	0	0	0	0	0	0	1869	610.5	0	48507
1870	1870	0	0	1568.8		275.6	551.2	1568.8	3116.4	0	157.39	80.8432	238.233	1870	0	0	0	0	0	0	0	0		0	0	0	0	212	0	0	0.0629502	0.0629502	1870	0	0	0		0	0	0	0	0	0	0	0	1870	666	0	48729
1871	1871	0	0	355.1		217.3	434.6	355.1	3339	0	93.6232	86.8422	180.465	1871	0	0	0	0	0	0	0	0		0	0	0	0	106	0	0	0.0319876	0.0319876	1871	0	0	0		0	0	0	0	0	0	0	0	1871	610.5	0	49062
1872	1872	0	0	492.9		238.5	477	492.9	3561.6	0	106.651	92.8711	199.522	1872	0	0	0	0	0	0	0	0		0	0	0	0	106	0	0	0.0325314	0.0325314	1872	0	0	0		0	0	0	0	0	0	0	0	1872	721.5	0	49506
1873	1873	0	0	2072.3		344.5	689	2072.3	3784.2	0	200.563	98.9299	299.493	1873	0	0	0	0	0	0	0	0		0	0	0	0	212	0	0	0.0639064	0.0639064	1873	0	0	0		0	0	0	0	0	0	0	0	1873	832.5	0	49839
1874	1874	0	0	318		254.4	508.8	318	4006.8	0	106.527	105.019	211.546	1874	0	0	0	0	0	0	0	0		0	0	0	0	212	0	0	0.0657929	0.0657929	1874	0	0	0		0	0	0	0	0	0	0	0	1874	832.5	0	50172
1875	1875	0	0	996.4		307.4	614.8	996.4	4229.4	0	150.504	111.137	261.642	1875	0	0	0	0	0	0	0	0		0	0	0	0	106	0	0	0.0336526	0.0336526	1875	0	0	0		0	0	0	0	0	0	0	0	1875	777	0	50505
1876	1876	0	0	621.55		302.1	604.2	621.55	4514.15	0	135.233	118.923	254.157	1876	0	0	0	0	0	0	0	0		0	0	0	0	212	0	0	0.066153	0.066153	1876	0	0	0		0	0	0	0	0	0	0	0	1876	721.5	0	50616
1877	1877	0	0	967.5		339.2	678.4	967.5	4798.9	0	161.305	126.748	288.053	1877	0	0	0	0	0	0	0	0		0	0	0	0	212	0	0	0.066711	0.066711	1877	0	0	0		0	0	0	0	0	0	0	0	1877	832.5	0	51171
1878	1878	0	0	953.051		355.1	710.2	953.051	5083.65	0	166.942	134.61	301.552	1878	0	0	0	0	0	0	0	0		0	0	0	0	212	0	0	0.0685471	0.0685471	1878	0	0	0		0	0	0	0	0	0	0	0	1878	832.5	0	51282
1879	1879	0	0	578.201		349.8	699.6	578.201	5368.4	0	152.148	142.511	294.659	1879	0	0	0	0	0	0	0	0		0	0	0	0	318	0	0	0.101179	0.101179	1879	0	0	0		0	0	0	0	0	0	0	0	1879	777	0	51837
1880	1880	0	0	1915.25		445.2	890.4	1915.25	5653.15	0	234.6	150.45	385.05	1880	0	0	0	0	0	0	0	0		0	0	0	0	318	0	0	0.103144	0.103144	1880	0	0	0		0	0	0	0	0	0	0	0	1880	777	0	52170
1881	1881	0	0	1720.6		450.5	901	1720.6	5937.9	0	230.088	158.427	388.516	1881	0	0	0	0	0	0	0	0		0	0	0	0	424	0	0	0.144651	0.144651	1881	0	0	0		0	0	0	0	0	0	0	0	1881	832.5	0	52503
1882	1882	0	0	2517.05		514.1	1028.2	2517.05	6222.65	0	282.08	166.443	448.523	1882	0	0	0	0	0	0	0	0		0	0	0	0	318	0	0	0.11501	0.11501	1882	0	0	0		0	0	0	0	0	0	0	0	1882	888	0	53169
1883	1883	0	0	2772.9		545.9	1091.8	2772.9	6507.4	0	303.447	174.497	477.944	1883	0	0	0	0	0	0	0	0		0	0	0	0	212	0	0	0.0805273	0.0805273	1883	0	0	0		0	0	0	0	0	0	0	0	1883	888	0	53169
1884	1884	0	0	3118.85		583	1166	3118.85	6792.15	0	329.981	182.589	512.57	1884	0	0	0	0	0	0	0	0		0	0	0	0	424	0	0	0.171242	0.171242	1884	0	0	0		0	0	0	0	0	0	0	0	1884	888	0	53502
1885	1885	0	0	2209.19		530	1060	2209.19	6800.81	0	278.638	183.279	461.917	1885	0	0	0	0	0	0	0	0		0	0	0	0	424	0	0	0.177789	0.177789	1885	0	0	0		0	0	0	0	0	0	0	0	1885	888	0	53613
1886	1886	0	0	3286.07		593.6	1187.2	3286.07	6805.13	0	340.837	183.853	524.691	1886	0	0	0	0	0	0	0	0		0	0	0	0	424	0	0	0.186589	0.186589	1886	0	0	0		0	0	0	0	0	0	0	0	1886	1054.5	0	54501
1887	1887	0	0	3860.78		657.2	1314.4	3860.78	7311.62	0	385.731	198.029	583.76	1887	0	0	0	0	0	0	0	0		0	0	0	0	424	0	0	0.194756	0.194756	1887	0	0	0		0	0	0	0	0	0	0	0	1887	1110	0	54723
1888	1888	0	0	3776.39		699.6	1399.2	3776.39	8116.81	0	400.214	220.382	620.596	1888	0	0	0	0	0	0	0	0		0	0	0	0	530	0	0	0.248508	0.248508	1888	0	0	0		0	0	0	0	0	0	0	0	1888	1110	0	55278
1889	1889	0	0	5368.17		821.5	1643	5368.17	8597.33	0	503.56	234.007	737.567	1889	0	0	0	0	0	0	0	0		0	0	0	0	530	0	0	0.256201	0.256201	1889	0	0	0		0	0	0	0	0	0	0	0	1889	1054.5	0	55500
1890	1890	0	0	5721.01		863.9	1727.8	5721.01	8965.29	0	533.876	244.625	778.501	1890	0	0	0	0	0	0	0	0		0	0	0	0	530	0	0	0.264661	0.264661	1890	0	0	0		0	0	0	0	0	0	0	0	1890	1221	0	55167
1891	1891	0	0	5631.2		885.1	1770.2	5631.2	9415.5	0	540.144	257.542	797.686	1891	0	0	0	0	0	0	0	0		0	0	0	0	530	0	0	0.270532	0.270532	1891	0	0	0		0	0	0	0	0	0	0	0	1891	1110	0	55833
1892	1892	0	0	4331.13		837.4	1674.8	4331.13	9904.67	0	477.197	271.589	748.785	1892	0	0	0	0	0	0	0	0		0	0	0	0	636	0	0	0.335332	0.335332	1892	0	0	0		0	0	0	0	0	0	0	0	1892	1110	0	56166
1893	1893	0	0	2312.67		720.8	1441.6	2312.67	9940.93	0	361.703	273.251	634.954	1893	0	0	0	0	0	0	0	0		0	0	0	0	636	0	0	0.337542	0.337542	1893	0	0	0		0	0	0	0	0	0	0	0	1893	1165.5	0	56499
1894	1894	0	0	4979.42		879.8	1759.6	4979.42	9977.18	0	519.445	274.918	794.363	1894	0	0	0	0	0	0	0	0		0	0	0	0	636	0	0	0.343069	0.343069	1894	0	0	0		0	0	0	0	0	0	0	0	1894	1110	0	57276
1895	1895	0	0	4042.16		826.8	1653.6	4042.16	10013.4	0	467.012	276.591	743.603	1895	0	0	0	0	0	0	0	0		0	0	0	0	636	0	0	0.349974	0.349974	1895	0	0	0		0	0	0	0	0	0	0	0	1895	1165.5	0	57387
1896	1896	0	0	4005.9		826.8	1653.6	4005.9	10049.7	0	467.17	278.268	745.438	1896	0	0	0	0	0	0	0	0		0	0	0	0	636	0	0	0.359455	0.359455	1896	0	0	0		0	0	0	0	0	0	0	0	1896	1165.5	0	57609
1897	1897	0	0	4330.05		848	1696	4330.05	10086	0	488.787	279.95	768.737	1897	0	0	0	0	0	0	0	0		0	0	0	0	636	0	0	0.371503	0.371503	1897	0	0	0		0	0	0	0	0	0	0	0	1897	1332	0	57831
1898	1898	0	0	6636.39		985.8	1971.6	6636.39	10122.2	0	628.054	281.636	909.691	1898	0	0	0	0	0	0	0	0		0	0	0	0	636	0	0	0.374577	0.374577	1898	0	0	0		0	0	0	0	0	0	0	0	1898	1332	0	58164
1899	1899	0	0	5969.44		948.7	1897.4	5969.44	10158.5	0	591.745	283.328	875.073	1899	0	0	0	0	0	0	0	0		0	0	0	0	636	0	0	0.3821	0.3821	1899	0	0	0		0	0	0	0	0	0	0	0	1899	1387.5	0	58608
1900	1900	0	0	7014.38		1012.3	2024.6	7014.38	10194.7	0	657.505	285.025	942.53	1900	0	0	0	0	0	0	0	0		0	0	0	0	636	0	0	0.396094	0.396094	1900	0	0	0		0	0	0	0	0	0	0	0	1900	1498.5	0	58830
1901	1901	0	0	6536.93		1001.7	2003.4	6536.93	10492	0	638.825	294.856	933.681	1901	0	0	18.55	0	0	0	0	0		0	0	18.55	0	723.45	0.676401	0	0.466512	1.14291	1901	0	0	0		0	0	0	0	0	0	0	0	1901	1443	0	59496
1902	1902	0	0	8041.67		1107.7	2215.4	8041.67	10789.2	0	739.607	304.849	1044.46	1902	0	0	31.8	0	0	0	0	0		0	0	31.8	0	604.2	1.16512	0	0.395705	1.56083	1902	0	0	0		0	0	0	0	0	0	0	0	1902	1498.5	0	60384
1903	1903	0	0	8555.32		1155.4	2310.8	8555.32	11086.5	0	781.541	315.013	1096.55	1903	0	0	55.65	0	0	0	0	0		0	0	55.65	0	686.35	2.04935	0	0.463851	2.5132	1903	0	0	0		0	0	0	0	0	0	0	0	1903	1609.5	0	60384
1904	1904	0	0	10333.3		1266.7	2533.4	10333.3	11200.6	0	896.746	320.122	1216.87	1904	0	0	62.174	0	0	0	0	0		0	1.42596	62.174	0	572.4	2.45578	0	0.395202	2.85098	1904	0	0	0		0	0	0	0	0	0	0	0	1904	1665	0	60939
1905	1905	0	0	9768.72		1240.2	2480.4	9768.72	11314.7	0	870.004	325.36	1195.36	1905	0	0	89.0715	0	0	0	0	0		0	3.67852	89.0715	0	649.25	3.71573	0	0.453307	4.16904	1905	0	0	0		0	0	0	0	0	0	0	0	1905	1554	0	61161
1906	1906	0	0	12537.8		1409.8	2819.6	12537.8	11428.8	0	1048.63	330.732	1379.36	1906	0	0	105.607	0	0	0	0	0		0	5.69342	105.607	0	630.7	4.57768	0	0.44995	5.02763	1906	0	0	0		0	0	0	0	0	0	0	0	1906	1609.5	0	61494
1907	1907	0	0	14856.4		1552.9	3105.8	14856.4	11542.9	0	1201.85	336.246	1538.09	1907	0	0	122.142	0	0	0	0	0		0	7.70832	122.142	0	612.15	5.45174	0	0.441157	5.8929	1907	0	0	0		0	0	0	0	0	0	0	0	1907	1720.5	0	61716
1908	1908	0	0	15102.7		1574.1	3148.2	15102.7	11657	0	1228.08	341.91	1569.99	1908	0	0	138.677	0	0	0	0	0		0	9.72322	138.677	0	593.6	6.33908	0	0.427574	6.76665	1908	0	0	0		0	0	0	0	0	0	0	0	1908	1665	0	62493
1909	1909	0	0	14988.6		1574.1	3148.2	14988.6	11771.1	0	1232.31	347.73	1580.04	1909	0	0	177.385	0	0	0	0	0		0	13.415	177.385	0	657.2	8.27409	0	0.47233	8.74642	1909	0	0	0		0	0	0	0	0	0	0	0	1909	1665	0	62826
1910	1910	0	0	15775.5		1627.1	3254.2	15775.5	11885.2	0	1294.05	353.716	1647.77	1910	0	0	269.888	0	0	0	0	0		0	21.6119	269.888	0	874.5	12.8166	0	0.697904	13.5145	1910	0	0	0		0	0	0	0	0	0	0	0	1910	1831.5	0	63159
1911	1911	0	0	16562.4		1680.1	3360.2	16562.4	11999.3	0	1357.06	359.875	1716.93	1911	0	0	295.872	0	0	0	0	0		0	24.7782	295.872	0	845.35	14.2808	0	0.697657	14.9785	1911	0	0	0		0	0	0	0	0	0	0	0	1911	1887	0	63603
1912	1912	0	0	19151.3		1839.1	3678.2	19151.3	12113.4	0	1537.41	366.217	1903.63	1912	0	0	234.077	0	0	0	0	0		0	20.3232	234.077	0	593.6	11.4712	0	0.514115	11.9853	1912	0	0	0		0	0	0	0	0	0	0	0	1912	1942.5	0	64047
1913	1913	0	0	20839.2		1945.1	3890.2	20839.2	12227.5	0	1662.77	372.751	2035.52	1913	-0.0173773	0	316.235	0	0	0	0	0		0	28.2825	316.218	0	715.5	15.7213	0	0.666449	16.3878	1913	0	0	0		0	0	0	0	0	0	0	0	1913	1998	0	63936
1914	1914	0	0	17571.6		1759.6	3519.2	17571.6	12341.6	0	1466.53	379.486	1846.02	1914	2.73643	0	235.151	0	0	0	0	0		0	21.8126	237.887	0	482.3	12.1219	0	0.475	12.5969	1914	0	0	0		0	0	0	0	0	0	0	0	1914	555	0	63936
1915	1915	0	0	14754.5		1600.6	3201.2	14754.5	12455.7	0	1296.94	386.434	1683.37	1915	5.48503	0	248.937	0	0	0	0	0		0	23.8275	254.422	0	463.75	13.2628	0	0.478594	13.7413	1915	0	0	0		0	0	0	0	0	0	0	0	1915	2997	0	63936
1916	1916	0	0	11486.4		1415.07	2830.13	11486.4	12569.8	0	1094.45	393.604	1488.06	1916	11.7623	0	375.32	0	0	0	0	0		0	36.9177	387.082	0	636	20.613	0	0.70821	21.3212	1916	0	0	0		0	0	0	0	0	0	0	0	1916	3996	0	63492
1917	1917	0	0	4117.1		588.156	1176.31	4117.1	5881.56	0	432.548	185.949	618.496	1917	15.6889	0	395.015	0	0	0	0	0		0	39.7962	410.704	0	609.5	22.3188	0	0.702138	23.0209	1917	0	0	0		0	0	0	0	0	0	0	0	1917	4939.5	0	65268
1918	1918	0	0	1096.34		365.446	730.891	1096.34	5116.24	0	209.042	163.368	372.41	1918	5.88464	0	110.961	0	0	13.4523	0	0		0	12.8024	116.845	13.4523	174.9	6.51057	1.40289	0.203535	8.117	1918	0	0	0		0	0	0	0	0	0	0	0	1918	5938.5	0	65823
1919	1919	0	0	9403.21		868.835	1737.67	9403.21	5366.99	0	790.114	173.146	963.259	1919	32.9236	0	516.906	0	0	90.6097	0	0		0	63.706	549.83	90.6097	778.266	32.3051	9.55615	0.873999	42.7353	1919	0	0	0		0	0	0	0	0	0	0	0	1919	3996	0	69375
1920	1920	0	0	9372.26		868.724	1737.45	9372.26	5396.05	0	797.399	175.945	973.344	1920	46.6073	0	640.898	0	0	129.596	0	0		0	82.176	687.505	129.596	899.277	41.4116	13.7904	1.06336	56.2654	1920	0	0	0		0	0	0	0	0	0	0	0	1920	2275.5	0	74370
1921	1921	0	0	9791.82		895.113	1790.23	9791.82	5425.11	0	836.876	178.847	1015.72	1921	50.0761	0	621.558	0	0	134.156	0	0		0	81.8405	671.634	134.156	803.095	41.343	14.3696	1.09277	56.8054	1921	0	0	0		0	0	0	0	0	0	0	0	1921	2442	0	66378
1922	1922	0	0	17212.2		1329.6	2659.2	17212.2	5391.06	0	1373.84	179.755	1553.6	1922	66.8705	0	533.304	0	200.285	200.677	0	0		0	102.588	600.174	400.963	903.048	42.2343	38.841	1.25673	82.3321	1922	0	0	0		0	0	0	0	0	0	0	0	1922	2664	0	65490
1923	1923	0	0	13910.6		1133.39	2266.78	13910.6	5357.02	0	1152.08	180.726	1332.81	1923	82.096	0	625.668	0	226.174	221.591	0	0		0	119.367	707.764	447.765	942.314	50.3703	43.4761	1.45089	95.2973	1923	0	0	0		0	0	0	0	0	0	0	0	1923	2608.5	0	66600
1924	1924	0	0	17577.6		1492.76	2796.27	17577.6	5357.02	0	1479.8	182.925	1662.72	1924	98.8924	0	713.051	0	253.021	254.493	0	0		0	137.305	811.943	507.514	971.175	58.8467	49.4969	1.56937	109.913	1924	0	0	0		0	0	0	0	0	0	0	0	1924	2664	0	67599
1925	1925	0	0	18696		1719.08	3037.59	18696	5358.68	0	1633.93	185.277	1819.21	1925	103.077	0	601.844	0	246.855	360.56	0	0		0	137.484	704.921	607.415	869.892	55.1102	60.6291	1.57991	117.319	1925	0	0	0		0	0	0	0	0	0	0	0	1925	2664	0	68598
1926	1926	0	0	16709.5		1721.46	2886.3	16709.5	5371.97	0	1541.36	188.139	1729.5	1926	137.089	0	766.876	0	309.322	461.231	0	0		0	176.512	903.966	770.554	996.709	71.5201	77.2427	2.01297	150.776	1926	0	0	0		0	0	0	0	0	0	0	0	1926	2775	0	69153
1927	1927	0	0	21469.6		2291.28	3663.61	21469.6	5622.71	0	2022.7	199.543	2222.25	1927	169.466	0	944.632	0	362.259	518.577	0	0		0	211.484	1114.1	880.836	1062.35	88.7631	88.3961	2.658	179.817	1927	0	0	0		0	0	0	0	0	0	0	0	1927	2830.5	0	69597
1928	1928	0	0	23886.7		2694.49	4126.19	23886.7	5622.71	0	2326.53	202.278	2528.81	1928	252.112	0	1458.57	0	512.99	647.389	0	0		0	305.966	1710.68	1160.38	1361.58	135.523	116.011	4.19309	255.727	1928	0	0	0		0	0	0	0	0	0	0	0	1928	2830.5	0	72039
1929	1929	0	0	22720.2		2786.08	4101.17	22720.2	5659.25	0	2321.55	206.463	2528.01	1929	262.499	0	1318.62	0	510.498	809.569	0	0		0	310.686	1581.12	1320.07	1218.3	132.364	133.893	4.85087	271.108	1929	0	0	0		0	0	0	0	0	0	0	0	1929	3108	0	72483
1930	1930	0	0	25301.6		3258.63	4625.75	25301.6	5684.16	0	2669.6	210.376	2879.97	1930	325.584	0	1414.2	0	607.324	1154.83	0	0		0	376.721	1739.78	1762.15	1292.88	154.71	180.638	6.38363	341.732	1930	0	0	0		0	0	0	0	0	0	0	0	1930	3052.5	0	73371
1931	1931	0	0	22831.8		3202.11	4395.78	22831.8	5684.16	0	2541.61	213.506	2755.12	1931	344.674	0	1153.11	0	618.601	1500.08	0	0		0	390.688	1497.79	2118.69	1163.37	148.265	219.843	6.35841	374.466	1931	0	0	0		0	0	0	0	0	0	0	0	1931	3163.5	0	73815
1932	1932	0	0	18310.5		2871.29	3821.25	18310.5	5705.74	0	2188.56	217.589	2406.15	1932	363.886	0	1234.18	0	630.098	1504.13	0	0		0	404.794	1598.07	2134.23	1034.27	158.583	221.112	6.32019	386.015	1932	0	0	0		0	0	0	0	0	0	0	0	1932	3163.5	0	74592
1933	1933	0	0	22651.8		3603.06	4658.93	22651.8	5727.33	0	2751.49	221.832	2973.32	1933	429.964	0	1660.64	0	720.078	1508.18	0	0		0	470.143	2090.6	2228.25	1015.85	199.179	229.951	6.87168	436.002	1933	0	0	0		0	0	0	0	0	0	0	0	1933	3219	0	75480
1934	1934	0	0	22434.6		3791.06	4772.12	22434.6	5748.92	0	2848.36	226.241	3074.61	1934	533.897	0	2347.58	0	866.681	1512.22	0	0		0	574.625	2881.48	2378.9	1029.71	264.272	252.008	7.66743	523.947	1934	0	0	0		0	0	0	0	0	0	0	0	1934	2997	0	75813
1935	1935	0	0	23743.5		4197.33	5152.59	23743.5	5770.51	0	3125.2	230.82	3356.02	1935	602.36	0	2761.57	0	949.656	1516.27	0	0		0	638.911	3363.93	2465.92	924.11	307.1	271.32	7.52555	585.945	1935	0	0	0		0	0	0	0	0	0	0	0	1935	2997	0	76701
1936	1936	0	0	21100.6		4038.43	4842.35	21100.6	5809.53	0	2944.68	236.286	3180.97	1936	611.625	0	2641.88	0	938.153	1630.44	0	0		0	640.024	3253.51	2568.6	718.015	306.895	291.064	6.16169	604.121	1936	0	0	0		0	0	0	0	0	0	0	0	1936	3330	0	77700
1937	1937	0	0	28286.2		5396.24	6329.17	28286.2	5848.55	0	3979.12	241.959	4221.08	1937	741.668	0	3356.83	0	1108.6	1744.62	0	0		0	766.42	4098.5	2853.22	625.795	384.658	322.752	5.64038	713.051	1937	0	0	0		0	0	0	0	0	0	0	0	1937	3441	0	78477
1938	1938	0	0	23374.1		4864.64	5588.36	23374.1	5883.98	0	3508.96	247.695	3756.66	1938	801.79	0	3664.4	0	1169.61	1771.76	0	0		0	818.915	4466.19	2941.37	432.972	422.66	333.129	4.08677	759.876	1938	0	0	0		0	0	0	0	0	0	0	0	1938	3441	0	79365
1939	1939	0	0	24898		5381.2	6061.85	24898	5919.4	0	3870.13	253.648	4123.78	1939	895.395	0	4190.65	0	1276.4	1798.9	0	0		0	904.59	5086.04	3075.3	232.46	483.19	347.353	2.3443	832.887	1939	0	0	0		0	0	0	0	0	0	0	0	1939	4717.5	0	80364
1940	1940	0	0	16126.3		4043.92	4471.9	16126.3	5954.83	0	2796.86	259.824	3056.68	1940	872.817	0	5236.9	0	1217.36	1826.04	0	0		0	872.817	6109.72	3043.41	0	541.723	345.238	0	886.961	1940	0	0	0		0	0	0	0	0	0	0	0	1940	5938.5	0	81030
1941	1941	0	0	15742.3		4162.45	4523.07	15742.3	5954.83	0	2861.75	264.657	3126.4	1941	806.953	0	4462.95	2.49934	1102.44	1796.83	0	0		52.3521	799.259	5269.91	2901.77	0	501.135	331.17	0	832.305	1941	0	0	0		0	0	0	0	0	0	0	0	1941	7215	0	81585
1942	1942	0	0	12671.5		3738.92	3995.97	12671.5	5954.83	0	2514.35	269.667	2784.02	1942	269.501	0	1372.73	1.61185	361.019	1505.47	0	0		33.7624	264.539	1642.23	1868.1	0	167.59	222.31	0	389.9	1942	0	0	0		0	0	0	0	0	0	0	0	1942	8436	0	82029
1943	1943	0	0	12248.8		3819.41	4018.17	12248.8	5954.83	0	2556.41	274.859	2831.27	1943	508.609	0	2383.21	4.41077	668.698	1647.87	0	0		92.3896	495.03	2891.82	2320.97	0	316.915	271.358	0	588.274	1943	0	0	0		0	0	0	0	0	0	0	0	1943	8436	0	82473
1944	1944	0	0	13296		4217.4	4370.9	13296	5953.17	0	2840.92	280.158	3121.07	1944	1097.81	0	4725.2	12.2844	1417.87	1572.48	0	0		257.314	1059.99	5823.02	3002.63	0	685.826	337.989	0	1023.82	1944	0	0	0		0	0	0	0	0	0	0	0	1944	8880	0	82917
1945	1945	0	0	12144.4		4136.38	4226.23	12144.4	5951.51	0	2758.26	285.642	3043.9	1945	1009.84	0	3985.35	13.6836	1282.26	1497.1	0	0		286.622	967.718	4995.19	2793.05	0	630.938	315.847	0	946.785	1945	0	0	0		0	0	0	0	0	0	0	0	1945	9213	0	83472
1946	1946	0	0	13247.6		4574.71	4610.97	13247.6	5951.51	0	3079.22	291.396	3370.62	1946	1811.71	0	6541.16	28.5661	2263.4	1635.82	219.879	0		598.357	1723.77	8352.87	4147.67	0	1138.96	454.011	0	1592.97	1946	0	0	0		0	0	0	0	0	0	0	0	1946	8991	0	83916
1947	1947	0	0	20186.8		6487.36	6454.5	20186.8	5951.51	0	4498.85	297.345	4796.19	1947	2922.39	0	9627.02	52.1771	3594.73	1774.55	1380.87	0		1092.92	2761.76	12549.4	6802.32	0	1841.49	721.728	0	2563.22	1947	0	0	0		0	0	0	0	0	0	0	0	1947	7437	0	84360
1948	1948	0	0	16654.4		5839.91	5738.76	16654.4	5951.51	0	4003.11	303.49	4306.6	1948	3277.53	0	9819.67	64.9666	3972.1	2189.42	1520.83	0		1360.81	3077.53	13097.2	7747.31	0	2076.52	831.122	0	2907.64	1948	0	0	0		0	0	0	0	0	0	0	0	1948	5827.5	0	84804
1949	1949	0	0	18739.1		6634.66	6442.89	18739.1	5951.51	0	4586.96	309.835	4896.79	1949	3321.33	0	9015.59	72.0067	3968.26	2604.29	1319.57	0		1508.28	3099.66	12336.9	7964.12	0	2113.42	867.003	0	2980.43	1949	0	0	0		0	0	0	0	0	0	0	0	1949	5439	0	85581
1950	1950	0	0	15042.4		5864.22	5630.44	15042.4	5951.51	0	3993.09	316.381	4309.47	1950	3812.93	0	9334.29	89.3666	4493.78	3019.17	1663.58	0		1871.91	3537.81	13147.2	9265.9	0	2430.07	1014.04	0	3444.11	1950	0	0	0		0	0	0	0	0	0	0	0	1950	5328	0	86358
1951	1951	0	0	13471.7		5342.29	5073.8	13471.7	4937.27	0	3667.82	268.063	3935.88	1951	4528.68	0	9943.64	113.684	5267.78	3332.26	2429.93	0		2381.26	4178.71	14472.3	11143.7	0	2907.33	1222.61	0	4129.93	1951	0	0	0		0	0	0	0	0	0	0	0	1951	5050.5	0	86469
1952	1952	0	0	11299.5		4555.29	4281.44	11299.5	3817.79	0	3148.37	211.742	3360.11	1952	5099.45	0	9975.98	136.068	5857.4	3645.36	3057.17	0		2850.13	4680.57	15075.4	12696	0	3289.25	1401.67	0	4690.91	1952	0	0	0		0	0	0	0	0	0	0	0	1952	4939.5	0	86691
1953	1953	0	0	13314.3		5453.61	5074.64	13314.3	4124.46	0	3787.08	233.71	4020.79	1953	5658.15	0	9782.01	159.468	6420.8	3958.46	3704.08	0		3340.27	5167.23	15440.2	14242.8	0	3655.09	1584.8	0	5239.89	1953	0	0	0		0	0	0	0	0	0	0	0	1953	5605.5	0	86913
1954	1954	0	0	11304		4701.93	4333.25	11304	3189.88	0	3292.38	184.698	3477.07	1954	6375	0	9642.09	188.772	7150.33	4479.17	4396.03	0		3954.09	5793.86	16017.1	16214.3	0	4150.02	1820.71	0	5970.73	1954	0	0	0		0	0	0	0	0	0	0	0	1954	5772	0	87135
1955	1955	0	0	12024.1		5076.4	4635.21	12024.1	3067.34	0	3567.73	181.502	3749.23	1955	7455.14	0	9739.67	230.893	8268.34	4999.88	5648.45	0		4836.36	6744.33	17194.8	19147.6	0	4852.12	2170.41	0	7022.53	1955	0	0	0		0	0	0	0	0	0	0	0	1955	5772	0	87246
1956	1956	0	0	12236.1		5240.82	4742.86	12236.1	2795.84	0	3717.29	169.087	3886.37	1956	7903.56	0	8772.75	255.027	8671.17	5496.95	6064.17	0		5341.88	7118.46	16676.3	20487.3	0	5193.14	2346.23	0	7539.37	1956	0	0	0		0	0	0	0	0	0	0	0	1956	6105	0	87468
1957	1957	0	0	14643.3		6359.87	5706.35	14643.3	2963.09	0	4543.18	183.171	4726.36	1957	8017.67	0	7395.85	268.63	8704.85	5994.01	5997.69	0		5626.83	7190.69	15413.5	20965.2	0	5299.91	2424.32	0	7724.23	1957	0	0	0		0	0	0	0	0	0	0	0	1957	6327	0	87690
1958	1958	0	0	12665		5575.51	4961.33	12665	2237.54	0	4005.4	141.392	4146.79	1958	8693.34	0	6461.3	301.548	9343.61	6544.87	6730.59	0		6316.33	7765.02	15154.6	22920.6	0	5766.9	2677.61	0	8444.51	1958	0	0	0		0	0	0	0	0	0	0	0	1958	5883	0	87912
1959	1959	0	0	11391.9		5081.2	4485.5	11391.9	1725.14	0	3672.61	111.439	3784.05	1959	9771.14	0	5587.56	349.985	10400.1	7095.72	8119.32	0		7330.91	8693.71	15358.7	25965.1	0	6511.12	3068.55	0	9579.67	1959	0	0	0		0	0	0	0	0	0	0	0	1959	6049.5	0	88023
1960	1960	0	0	11335.9		5120.91	4485.83	11335.9	2778.19	47.6642	3693.91	183.463	3877.38	1960	8846.88	0	3607.17	326.46	9327.98	7676.51	7512.04	1891.04		6838.15	7841.87	12454	26734	0	5913.69	3570.73	0	9484.41	1960	0	0	0		0	0	0	0	0	0	0	0	1960	9067.12	1240.98	85736.5
1961	1961	0	0	11276.7		7228.14	5984.43	11276.7	2849.2	62.6203	4845.15	192.344	5037.49	1961	8618.1	0	5276.26	1865.61	10027.6	8489.33	7647.49	1256.09		7632.33	8460.93	13894.4	29286.1	0	6471.27	3804.51	0	10275.8	1961	0	0	0		0	0	0	0	0	0	0	0	1961	11794.5	2441.31	80739.5
1962	1962	0	0	10858.4		5156.08	3782.16	10858.4	2418.71	101.142	3597.44	166.918	3764.35	1962	6832.76	0	3255.9	1259.28	10587.3	13366.2	8031.86	1529.78		8088.89	10308.5	10088.7	34774.4	0	6706.04	4558.2	0	11264.2	1962	0	0	0		0	0	0	0	0	0	0	0	1962	14556.4	3633.51	76547.3
1963	1963	0	0	11223.5		7337.43	6043.79	11223.5	2347.71	84.8991	5011.16	165.618	5176.78	1963	6311.34	0	4265.01	979.424	10867.1	14811.2	7862.24	1444.97		9195.62	12175.2	10576.4	35965	0	7613.18	4706.99	0	12320.2	1963	0	0	0		0	0	0	0	0	0	0	0	1963	16962	4720.04	71104.6
1964	1964	0	0	10777.3		7322.47	5992.8	10777.3	2019.29	102.873	5003.5	145.607	5149.11	1964	6985.31	0	5158.16	792.895	12079.8	13546.8	7144.17	1580.46		10781.2	12976.5	12143.5	35144.1	0	8650.76	4609.61	0	13260.4	1964	0	0	0		0	0	0	0	0	0	0	0	1964	19606	5859.41	67165.4
1965	1965	0	0	9890.59		6925.02	5633.03	9890.59	1943.85	91.423	4749.8	143.262	4893.06	1965	7501.61	0	5906.5	979.424	13292.4	14901.5	6550.59	1670.78		12620.4	14065.1	13408.1	37394.7	0	9859.1	4894.94	0	14754	1965	0	0	0		0	0	0	0	0	0	0	0	1965	22082.5	6941.88	62905.8
1966	1966	0	0	10380.7		7411.23	5913.36	10380.7	1837.34	99.0563	5081.58	138.387	5219.97	1966	5556.52	84.8103	6960.17	979.424	14691.6	19823.5	5538.5	1761.09		11925	14738.2	12601.5	42794.1	0	9567.72	5545.85	0	15113.6	1966	0	0	0		0	0	0	0	0	0	0	0	1966	24343.6	7947.12	58385.5
1967	1967	0	0	10460.4		7751.34	5468.74	10460.4	1642.06	346.653	5174.7	126.381	5301.08	1967	4873.69	296.814	8855.42	746.251	16277.4	22036.1	5162.42	2077.17		13031.5	16655.8	14025.9	46299.3	0	10611.1	6012.81	0	16624	1967	0	0	0		0	0	0	0	0	0	0	0	1967	27050.6	9093.26	55109.5
1968	1968	0	0	8004.52		5648.99	3228.41	8004.52	1313.65	84.8991	3653.46	103.3	3756.76	1968	4827.27	169.621	10038.4	699.608	17769.8	23932.7	4254.41	1941.72		14775.4	17800.6	15035.3	48598.2	0	11720.8	6222.96	0	17943.7	1968	0	0	0		0	0	0	0	0	0	0	0	1968	29622.2	10193.3	51578.7
1969	1969	0	0	7354.53		6156.67	3596.69	7354.53	1224.89	212.802	3931.56	98.3947	4029.96	1969	4508.17	84.8103	11425.5	559.677	20148.5	25964.7	3459.83	1941.72		16757.6	22476.3	16018.5	52074.4	0	13779.5	6582.07	0	20361.5	1969	0	0	0		0	0	0	0	0	0	0	0	1969	31711.2	11122.7	47379.3
1970	1970	0	467.322	7134.45		6581.97	4135.69	7601.78	1220.45	125.285	4305.94	100.132	4406.07	1970	13345.4	5713.4	13165.8	9675.66	22107.4	26867.8	3256.12	1941.72		13772.6	23625.3	32224.7	63848.7	0	15326.3	8418.02	0	23744.3	1970	0	0	0		0	0	0	0	0	0	0	0	1970	33641.8	11989.1	43219
1971	1971	0	605.3	4807.25		6283.82	3958.35	5412.55	1220.45	114.012	4014.58	102.251	4116.83	1971	9440.11	7927.75	19341.2	10680.6	25791.9	29441.6	3301.26	1713.16		15807.6	28131.5	36709	70928.5	0	17488.8	9267.03	0	26755.8	1971	0	0	0		0	0	0	0	0	0	0	0	1971	35466.9	12810.8	39190.3
1972	1972	0	568.287	2339.94		5116.09	1797.62	2908.23	1176.07	379.583	2843.13	100.596	2943.73	1972	11862.5	7934.09	21910	12042.7	28543.7	32151	3346.44	1622.85		17371.8	30929	41706.5	77706.6	0	19616.5	10156.2	0	29772.8	1972	0	0	0		0	0	0	0	0	0	0	0	1972	35674.5	12165	38740.5
1973	1973	0	591.098	3082.77		5420.27	1384.39	3673.87	852.098	542.68	2946.94	74.3934	3021.34	1973	13759	9479.63	21700.7	12907.6	33300.9	35582.8	3391.57	1848.61		19975.3	33320.7	44939.3	87031.6	0	21866.6	11365.9	0	33232.5	1973	0	0	0		0	0	0	0	0	0	0	0	1973	34853.3	12350.6	38488
1974	1974	0	641.558	2084.31		4950.11	1607	2725.87	931.982	339.019	2747.79	83.0319	2830.82	1974	16941.7	10726.2	20814.1	10945.6	31855.1	36486	3012.74	1713.16		21056.6	36193.7	48482	84012.6	0	23843.1	10926.7	0	34769.8	1974	0	0	0		0	0	0	0	0	0	0	0	1974	34904.5	12079.6	38041.9
1975	1975	0	625.36	1729.76		7867.26	355.218	2355.12	798.841	371.816	3680.24	72.6068	3752.85	1975	15520.4	10760	22439.6	12995.6	37498.5	39195.5	2800.74	1713.16		19817.1	34242.1	48720.1	94203.5	0	22868.3	12232.3	0	35100.5	1975	0	0	0		0	0	0	0	0	0	0	0	1975	33233.5	13343.3	38116.2
1976	1976	0	653.94	1816.83		6923.6	477.618	2470.77	718.957	426.626	3335.88	66.6467	3402.53	1976	18640.9	10424	23283.9	10215.2	36425.8	42175.6	2512.18	1758.29		23068.6	36644.7	52348.9	93087.2	0	25565.8	11999.4	0	37565.2	1976	0	0	0		0	0	0	0	0	0	0	0	1976	33681.1	11335.5	38455.4
1977	1977	0	689.223	1982.68		8689.44	596.868	2671.9	479.305	495.282	4167.54	45.3023	4212.84	1977	19739.8	10718.7	26212.7	10533.2	35446.4	46826.8	2300.18	1882.78		23873.8	36237.4	56671.2	96989.3	0	26441.3	12600.7	0	39042	1977	0	0	0		0	0	0	0	0	0	0	0	1977	35506	11009.2	37622.8
1978	1978	0	702.759	1785.72		9163.51	1261.86	2488.48	279.595	259.402	4543.02	26.9364	4569.96	1978	20966.9	10006.4	27920.4	10668.9	35119.9	52335.8	2348.11	1896.54		25535.5	39692.5	58893.7	102369	0	28383	13353.4	0	41736.3	1978	0	0	0		0	0	0	0	0	0	0	0	1978	34863.3	10881.7	37394
1979	1979	0	683.143	1891.92		8783.35	1207.94	2575.07	124.264	407.232	4396.59	12.1989	4408.79	1979	23621.9	9484.91	25746.3	10166.5	34886.7	61096.1	2619.05	1580.46		27301.2	42023	58853.1	110349	0	30161.4	14328.9	0	44490.2	1979	0	0	0		0	0	0	0	0	0	0	0	1979	36261.2	10283.8	35262
1980	1980	0	653.452	1784.21		8194.4	1201.35	2437.66	31.0661	540.194	4141.63	3.10661	4144.74	1980	24154.8	9149.93	26499.6	10303.2	35026.6	68682.2	2257.79	2122.34		28269.7	42321.1	59804.3	118392	0	30880.8	15489.3	0	46370.1	1980	0	0	0		0	0	0	0	0	0	0	0	1980	30525.3	8623.67	42214
1981	1981	62.1321	93.1982	2438.91		5589.98	1596.8	2594.24	31.0661	439.23	3090.72	3.16348	3093.88	1981	24018.7	8914.58	23817.9	9162.67	36381.3	72294.8	2573.91	1986.85		28436.6	47265.5	56751.1	122400	0	31958.8	15908.5	0	47867.3	1981	0	0	0		0	0	0	0	0	0	0	0	1981	30537.5	8478.62	42235.9
1982	1982	62.1321	62.1321	2339.14		5283.76	1299.18	2463.41	0	281.148	2885.72	0	2885.72	1982	23448.5	9811.33	24637.3	9710.63	37825.1	77126.5	2483.6	2032.03		30865.7	46725.9	57897.1	129178	0	33219.8	16811.5	0	50031.3	1982	0	0	0		0	0	0	0	0	0	0	0	1982	33316	7965.65	40636.4
1983	1983	62.1321	62.1321	2299.33		7726.55	1208.36	2423.6	31.0661	181.515	3961.1	3.27695	3964.38	1983	24627.7	10313.8	23004.9	8068.7	37964.9	78210.2	2528.73	2077.17		26372.3	46861.5	57946.5	128850	0	31552.7	16677.8	0	48230.6	1983	0	0	0		0	0	0	0	0	0	0	0	1983	34912.8	8004.86	38556.3
1984	1984	0	31.0661	2373.18		9871.88	1054.45	2404.25	0	960.341	4892.47	0	4892.47	1984	25326	9834.67	26335.1	8615.68	37778.4	74236.4	2528.73	2032.03		24608.1	40469.3	61495.7	125191	0	29668.4	16286.7	0	45955.1	1984	0	0	0		0	0	0	0	0	0	0	0	1984	34680.4	7618.61	38398
1985	1985	0	29.9566	2225.97		16629.5	1996.37	2255.93	0	1041.64	8170.23	0	8170.23	1985	21462	11579.5	26705	1733.09	39877.2	73739.7	2573.91	2348.11		21438	34258.1	59746.5	120272	0	26282.5	15096.1	0	41378.6	1985	0	0	0		0	0	0	0	0	0	0	0	1985	39917.1	7522.85	37475
1986	1986	29.9566	29.9566	2388.8		22255.8	1200.48	2448.72	59.8687	960.784	10560.6	6.63993	10567.2	1986	23518.9	8774.7	27466.9	1734.15	43841.6	76855.5	2619.05	2257.79		14990	31161.9	59760.5	127308	0	22758.4	15873.1	0	38631.5	1986	0	0	0		0	0	0	0	0	0	0	0	1986	43587	7256.18	34182.9
1987	1987	0	27.5156	2245.23		24819.8	476.176	2272.75	0	914.673	11539.9	0	11539.9	1987	24412.9	8796.93	31978.7	2828.08	48880.8	81687.1	2709.36	2167.48		14147.2	29068.9	65188.6	138273	0	22395.1	17226.8	0	39622	1987	0	0	0		0	0	0	0	0	0	0	0	1987	45885.4	7994.77	34919.8
1988	1988	0	27.5156	2315.66		27828.6	386.173	2343.18	0	864.657	12944.4	0	12944.4	1988	25047.4	8852.05	31610.9	2554.61	54104.6	89634.7	2754.49	2348.11		15988.8	33424.9	65510.3	151396	0	24598.1	18776.1	0	43374.2	1988	0	0	0		0	0	0	0	0	0	0	0	1988	45575.6	8375.79	34515.6
1989	1989	0	28.3145	2345.58		29162.2	437.499	2373.89	0	466.08	13588.5	0	13588.5	1989	25007.7	9295.1	30219.3	3010.39	58957.2	94059.9	2664.22	2077.17		16867.1	39983.2	64522.1	160769	0	26588.5	19814.2	0	46402.7	1989	0	0	0		0	0	0	0	0	0	0	0	1989	24916.6	4366.92	57074.5
1990	1990	0	0	2373.89		26548.8	473.691	2373.89	0	743.766	12453.6	0	12453.6	1990	25043	10302.1	33172	3557.37	64093.9	99930.3	2483.6	1941.72		18811.5	38616.4	68517.1	172007	0	27660.3	21114.6	0	48775	1990	0	0	0		0	0	0	0	0	0	0	0	1990	50528.6	4180.57	53435.1
1991	1991	0	0	2448.67		27278.8	416.818	2448.67	0	565.89	12827.9	0	12827.9	1991	25367.7	10421.9	34449.2	4104.31	70481.5	106026	2619.05	1896.54		18949.7	36156.1	70238.8	185128	0	27419.9	22676.8	0	50096.7	1991	0	0	0		0	0	0	0	0	0	0	0	1991	49880.5	3693.39	53435.1
1992	1992	0	0	2713.71		26187.3	388.414	2713.71	0	287.716	12380.7	0	12380.7	1992	21789.1	10519.5	37884.4	3420.64	79207.4	110858	2619.05	1806.22		19881.4	39435.2	70193	197911	0	28413.6	23977.3	0	52390.9	1992	0	0	0		0	0	0	0	0	0	0	0	1992	49436.5	3484.72	53435.1
1993	1993	0	0	2620.33		24977.7	253.965	2620.33	0	533.271	11828.1	0	11828.1	1993	23070.2	9951.26	39778.4	2509.03	84206.4	114335	2393.28	2122.34		17747.6	40614.4	72799.8	205566	0	28229.7	24773.3	0	53003.1	1993	0	0	0		0	0	0	0	0	0	0	0	1993	48831.7	4192.79	53435.1
1994	1994	0	0	2511.2		25394.1	279.395	2511.2	0	617.105	12028.9	0	12028.9	1994	24867.4	10939.2	40559.9	2873.65	87062	120837	2393.28	2257.79		21233.9	53302.6	76366.4	215424	0	33665.6	26027.9	0	59693.5	1994	0	0	0		0	0	0	0	0	0	0	0	1994	50311	4256.04	53435.1
1995	1995	0	0	2540.72		24117.2	294.262	2540.72	0	373.858	11447.4	0	11447.4	1995	21393.3	9474.26	43147.7	5289.4	89076	126346	2438.42	2077.17		21116.9	51809.6	74015.3	225227	0	32455.3	27479.2	0	59934.5	1995	0	0	0		0	0	0	0	0	0	0	0	1995	54371.8	3701.15	53435.1
1996	1996	0	0	2636.09		26960.8	282.235	2636.09	0	536.6	12823.7	0	12823.7	1996	39663.4	10693.3	44919.6	7067.04	92720.3	135468	2212.66	2077.17		19247.3	49877.8	95276.3	239545	0	35209.9	29407.5	0	64617.5	1996	0	0	0		0	0	0	0	0	0	0	0	1996	50786	3728.89	53435.1
1997	1997	0	0	2641.81		21323.5	257.76	2641.81	0	362.408	10203.9	0	10203.9	1997	36907.5	11753.3	46851.8	5517.29	92412.9	146712	2393.28	1986.85		22524.9	55459.2	95512.5	249022	0	37881.4	30431.2	0	68312.6	1997	0	3.74467	53.3398		1031.66	823.915	57.0845	0	29.9574	699.362	0	699.362	1997	53954.5	3740	53435.1
1998	1998	0	0	2876.41		18058.8	315.298	2876.41	0	375.766	8753.96	0	8753.96	1998	34190.7	12130.6	46979.5	7432.73	95904.6	163871	2122.34	2077.17		28437.3	55154	93300.8	271408	0	40322.6	33427.1	0	73749.7	1998	18.6798	374.293	596.056		4946.32	4261.35	989.029	0	105.722	3536.5	0	3536.5	1998	53650.3	3740	53435.1
1999	1999	0	0	2941.33		16242.1	1307.28	2941.33	0	519.38	8195.07	0	8195.07	1999	32932.4	9406.45	45637.2	9347.11	98622.4	175025	2257.79	1715.91		27206.9	61001.9	87976	286968	0	40660.5	35530.3	0	76190.9	1999	1159.37	1069.54	2115.7		8902.59	8052.94	4344.61	0	106.68	6857.2	0	6857.2	1999	54392.9	3828.76	53435.1
2000	2000	0	0	1855.93		19123	1180.29	1855.93	0	135.137	9424.92	0	9424.92	2000	30655.4	9308.94	44979	9939.63	100528	196699	2528.73	1941.72		23727.2	53487.1	84943.3	311638	0	36548.5	38763.8	0	75312.3	2000	3714.85	1171.56	5677.1		12355.4	11442.1	10563.5	48.6372	112.297	10200.1	3.89098	10204	2000	54891.1	3857.62	53435.1
2001	2001	0	0	197.447		8316.23	343.746	197.447	0	15.7105	4003	0	4003	2001	23046	7316.14	61317.6	7523.89	94558.4	198009	1896.54	2212.66		26905.8	59619.7	91679.8	304201	0	39359	37863.4	0	77222.4	2001	6463.09	2011.8	8807.12		14382.7	13400.2	17282	196.508	53.3398	12619.5	15.7207	12635.2	2001	54384	3933.1	53435.1
2002	2002	0	0	0		7539.02	312.125	0	0	0	3611.71	0	3611.71	2002	15949.2	9942.82	63368.5	6565.63	97916.4	200718	1580.46	3974.59		27185.8	58089.1	89260.5	310755	0	38234.6	38922.6	0	77157.2	2002	7847.05	2371.16	11156.7		15522.8	14305.5	21374.9	301.316	1251.07	13912.9	24.1052	13937	2002	57076.3	3959.73	53435.1
2003	2003	0	0	0		5805.65	311.038	0	0	0	2798.1	0	2798.1	2003	15661.4	8863.68	59584.9	6656.79	94976	212640	1354.7	2887.19		20430.8	56834	84110	318514	0	34141.3	39703.9	0	73845.2	2003	8183.94	3019.6	11995.1		15199.5	13713.6	23198.7	392.059	905.776	13824.5	31.3647	13855.8	2003	57279.4	4055.18	53435.1
2004	2004	0	0	0		3518.05	320.779	0	0	0	1731.19	0	1731.19	2004	9360.71	7608.7	57260.1	6656.79	91338.1	230973	1219.21	1128.9		19741.7	51701.5	74229.5	331316	0	30874.2	40951.9	0	71826.1	2004	8693.87	3028.96	13988.3		15558.4	14787.4	25711.1	408.91	875.862	14563.8	32.7128	14596.5	2004	57348.3	4044.08	53824.7
2005	2005	0	0	0		344.634	344.634	0	0	0	252.146	0	252.146	2005	7560.9	6552.94	65397.8	7387.15	85836.7	222122	1128.9	767.642		20215.3	53558.7	79511.6	317243	0	31791.2	39340.1	0	71131.3	2005	7932.26	3062.66	14635.8		16297.6	17952.1	25630.7	483.76	767.31	15657	38.7008	15695.7	2005	58177.2	4123.96	54102.1
2006	2006	0	0	0		761.607	431.197	0	0	0	469.398	0	469.398	2006	6765.5	7763.45	53839.1	6930.3	79444.9	218871	1083.76	903.135		19016.5	31206.4	68368.1	307233	0	24297.5	38217.8	0	62515.3	2006	7979.03	3683.98	15584.6		16250.9	18208.4	27247.6	452.888	2691.16	15853.8	36.231	15890.1	2006	59044	4184.98	53935.6
2007	2007	0	0	0		7112.57	323.309	0	0	0	3415.77	0	3415.77	2007	7493.8	5938.1	50328.8	7021.46	75431.7	221775	1083.76	5574.32		17516.4	48733.5	63760.7	310887	0	27850.4	40078.9	0	67929.3	2007	8490.83	4038.63	16915.3		17499.1	19216.2	29444.7	501.569	333.102	17023.2	40.1255	17063.3	2007	60813	4434.08	53935.6
2008	2008	0	0	0		2830.3	322.688	0	0	0	1410.44	0	1410.44	2008	6261.61	5875.61	41586.8	6747.95	71155.7	222592	1038.58	6096.94		15480.9	41335.8	53724	307631	0	23925.2	39893.1	0	63818.3	2008	8872.66	3813.12	17843.5		17024.3	18600	30529.3	523.079	917.968	16760.8	41.8463	16802.7	2008	60521.1	4494.68	53935.6
2009	2009	0	0	0		718.713	285.564	0	0	0	410.961	0	410.961	2009	6850.66	6104.52	43106.4	6428.9	70140.3	215981	812.821	8745.63		13349.5	44451.1	56061.6	302109	0	23942.4	39891.5	0	63833.9	2009	9008.29	4118.18	20268		15264.1	17512.7	33394.5	520.248	1320.3	15879.5	41.6199	15921.1	2009	56985.2	4749.03	53935.6
[truncated: 35 more columns]

## Sheet: UESectoral
country	sector	year	fencrude	fenrefingas	fenLPG	fenmotorgas	fenavigas	fenkeros	fendiesel	fenfueloil	fenbitum	fenpetrocoke	fennonspecoil	FEnOil	FEnCoal	FEnNGas	FEnCombRen	FEnElec	FEnFoFe	FEnONonConv	FEnTotal	fexcrude	fexrefingas	fexLPG	fexmotorgas	fexavigas	fexkeros	fexdiesel	fexfueloil	fexbitum	fexpetrocoke	fexnonspecoil	FExOil	FExCoal	FExNGas	FExCombRen	FExElec	FExFoFe	FExONonConv	FExTotal	FexMech_LPG	FexMech_motorgas	FexMech_avigas	FexMech_diesel	FexMech_fueloil	FexMech_ngas	FexMech_elec	FExHeatHigh_oilp	FExHeatHigh_coalcp
MEX	Industry	1971	0	0	4001	0	0	6344	17055	88433	0	0	0	115833	44603	189628	50922.2	44765	NA	0	445751	0	0	4241.06	0	0	6724.64	18078.3	93739	0	0	0	122783	47279.2	197213	56523.7	44765	NA	0	468564	0	0	0	18062.4	0	0	21651.6	36118.4	47005.7
MEX	Industry	1972	0	0	4335	0	0	6519	18917	104438	0	0	0	134209	49367	198090	49591.5	49934	NA	0	481191	0	0	4595.1	0	0	6910.14	20052	110704	0	0	0	142262	52329	206014	55046.5	49934	NA	0	505585	0	0	0	20032.9	0	0	24278	44848.6	52044.9
MEX	Industry	1973	0	0	4757	0	0	6447	20458	94419	0	0	0	126081	56783	221655	55472.3	55128	NA	0	515119	0	0	5042.42	0	0	6833.82	21685.5	100084	0	0	0	133646	60190	230521	61574.3	55128	NA	0	541059	0	0	0	21666.4	0	0	26942.9	40556.1	59832.2
MEX	Industry	1974	0	0	4618	0	0	6873	22287	131048	0	0	0	164826	58521	219086	57401.9	62366	NA	0	562201	0	0	4895.08	0	0	7285.38	23624.2	138911	0	0	0	174716	62032.3	227849	63716.2	62366	NA	0	590679	0	0	0	23603	0	0	30638.5	56422.2	61722.7
MEX	Industry	1975	0	0	5731	0	0	7418	23807	164916	0	0	0	201872	57221	214186	53934.7	67627	NA	0	594841	0	0	6074.86	0	0	7863.08	25235.4	174811	0	0	0	213984	60654.3	222753	59867.5	67627	NA	0	624886	0	0	0	25212.1	0	0	33394.9	76210.8	60267.9
MEX	Industry	1976	0	0	6062	0	0	7581	24529	200997	0	0	0	239169	61879	211550	51728	74970	NA	0	639296	0	0	6425.72	0	0	8035.86	26000.7	213057	0	0	0	253519	65591.7	220012	57418.1	74970	NA	0	671511	0	0	0	25972.1	0	0	37211.8	94952.7	65176.2
MEX	Industry	1977	0	0	6030	0	0	8039	25467	173098	0	0	0	212634	66607	220922	52875.8	81613	NA	0	634652	0	0	6391.8	0	0	8521.34	26995	183484	0	0	0	225392	70603.4	229759	58692.2	81613	NA	0	666060	0	0	0	26970.6	0	0	40717.2	79843.4	70156.6
MEX	Industry	1978	0	0	6487	0	0	8158	26815	196940	0	0	0	238400	70143	251148	62699	89311	NA	0	711701	0	0	6876.22	0	0	8647.48	28423.9	208756	0	0	0	252704	74351.6	261194	69595.8	89311	NA	0	747156	0	0	0	28394.2	0	0	44785.9	91105.9	73872.5
MEX	Industry	1979	0	0	6801	0	0	8158	28155	183186	0	0	0	226300	70910	296242	66977.1	97381	NA	0	757810	0	0	7209.06	0	0	8647.48	29844.3	194177	0	0	0	239878	75164.6	308092	74344.6	97381	NA	0	794860	0	0	0	29816.7	0	0	49081.8	82957.2	74654.2
MEX	Industry	1980	0	0	8583	0	0	7621	29315	164199	0	0	0	209718	64860	315333	64539.6	101500	NA	0	755951	0	0	9097.98	0	0	8078.26	31073.9	174051	0	0	0	222301	68751.6	327946	71639	101500	NA	0	792138	0	0	0	31049.5	0	0	51418	74049.5	68198.3
MEX	Industry	1981	0	0	8866	0	0	8472	30446	183348	0	0	0	231132	68889	342717	59309.6	111351	NA	0	813399	0	0	9397.96	0	0	8980.32	32272.8	194349	0	0	0	245000	73022.3	356426	65833.6	111351	NA	0	851633	0	0	0	32246.3	0	0	55760.9	85957.5	72519.4
MEX	Industry	1982	0	0	10966	0	0	6992	28722	175348	0	0	0	222028	65250	347073	63221.8	116623	NA	0	814196	0	0	11624	0	0	7411.52	30445.3	185869	0	0	0	235350	69165	360956	70176.3	116623	NA	0	852270	0	0	0	30415.6	0	0	57712.7	79105.2	68708.1
MEX	Industry	1983	0	0	14196	0	0	5306	27320	177497	0	0	0	224319	64043	380572	65764.4	120075	NA	0	854773	0	0	15047.8	0	0	5624.36	28959.2	188147	0	0	0	237778	67885.6	395795	72998.5	120075	NA	0	894532	0	0	0	28926.3	0	0	58701.7	78380.6	67532.1
MEX	Industry	1984	0	0	14470	0	0	4097	28402	182280	0	0	0	229249	64451	330300	72758	128632	NA	0	825390	0	0	15338.2	0	0	4342.82	30106.1	193217	0	0	0	243004	68318.1	343512	80761.4	128632	NA	0	864227	0	0	0	30070.1	0	0	62102.7	77681	67940.2
MEX	Industry	1985	0	0	15003	0	0	3612	28599	223640	0	0	0	270854	67507	341804	72190.1	137990	NA	0	890345	0	0	15903.2	0	0	3828.72	30314.9	237058	0	0	0	287105	71557.4	355476	80131.1	137990	NA	0	932260	0	0	0	30275.7	0	0	65768.8	96143.6	69931.4
MEX	Industry	1986	0	0	14804	0	0	4518	26861	211732	0	0	0	257915	64900	249329	78824.8	141157	NA	0	792126	0	0	15692.2	0	0	4789.08	28472.7	224436	0	0	0	273390	68794	259302	87495.6	141157	NA	0	830139	0	0	0	28438.7	0	0	66393.5	91540.5	66669.2
MEX	Industry	1987	0	0	13432	0	0	3213	37592	245216	0	0	0	299453	69518	271158	88830.9	151884	NA	0	880844	0	0	14237.9	0	0	3405.78	39847.5	259929	0	0	0	317420	73689.1	282004	98602.3	151884	NA	0	923600	0	0	0	39552.8	0	0	70472.3	107953	72171.2
MEX	Industry	1988	0	0	13806	0	0	2673	36473	219341	0	0	0	272293	68559	242251	78604.9	161592	NA	0	823300	0	0	14634.4	0	0	2833.38	38661.4	232501	0	0	0	288631	72672.5	251941	87251.5	161592	NA	0	862088	0	0	0	38328.5	0	0	73932.3	99300.3	70740.7
MEX	Industry	1989	0	0	14414	0	0	3114	38716	243719	0	0	0	299963	66615	263143	76339.4	178243	NA	0	884303	0	0	15278.8	0	0	3300.84	41039	258342	0	0	0	317961	70611.9	273669	84736.7	178243	NA	0	925221	0	0	0	40629.8	0	0	80380.8	118158	68895.8
MEX	Industry	1990	0	0	15154	0	0	2446	41102	253906	0	0	0	312608	64236	294070	81653.3	185255	NA	34	937856	0	0	16063.2	0	0	2592.76	43568.1	269140	0	0	0	331364	68090.2	305833	90635.2	185255	NA	34	981212	0	0	0	43314.8	0	0	82308.2	117507	63973.1
MEX	Industry	1991	0	0	16029	0	0	1941	47829	228671	0	0	0	294470	55629	311967	62501	187852	NA	36.01	912455	0	0	16990.7	0	0	2057.46	50698.7	242391	0	0	0	312138	58966.7	324446	69376.1	187852	NA	36.01	952815	0	0	0	50112.6	0	0	82553.7	108743	56449.8
MEX	Industry	1992	0	0	17525	0	0	2072	69682	213379	0	0	0	302658	63190	312093	49735.5	190191	NA	38.98	917906	0	0	18576.5	0	0	2196.32	73862.9	226182	0	0	0	320817	66981.4	324577	55206.4	190191	NA	38.98	957812	0	0	0	73340.3	0	0	82674.3	97596.3	64475
MEX	Industry	1993	0	0	17922	0	0	1038	67750	211242	0	0	0	297952	63810	304692	55298.4	195163	NA	44	916959	0	0	18997.3	0	0	1100.28	71815	223917	0	0	0	315829	67638.6	316880	61381.2	195163	NA	44	956936	0	0	0	71119.6	0	0	83917.3	101091	65022.5
MEX	Industry	1994	0	0	18602	0	0	1071	63088	227646	0	0	0	310407	70767	294262	41418	212799	NA	48.99	929702	0	0	19718.1	0	0	1135.26	66873.3	241305	0	0	0	329031	75013	306032	45974	212799	NA	48.99	968899	0	0	0	66050.7	0	0	90512.5	113698	72308.4
MEX	Industry	1995	0	0	17085	0	0	1026	64564	189452	0	0	0	272127	80472	317070	51229.1	224279	NA	48.99	945226	0	0	18110.1	0	0	1087.56	68437.8	200819	0	0	0	288455	85300.3	329753	56864.3	224279	NA	48.99	984700	0	0	0	67660.9	0	0	94367.9	94203.8	82433.5
MEX	Industry	1996	0	0	17658	0	0	1218	69290	224857	0	0	0	313023	85786	359082	58831.7	252427	NA	54.97	1.0692e+06	0	0	18717.5	0	0	1291.08	73447.4	238348	0	0	0	331804	90933.2	373445	65303.2	252427	NA	54.97	1.11397e+06	0	0	0	72560.2	0	0	105070	110745	87781.8
MEX	Industry	1997	0	0	17554	0	0	1205	75575	225891	0	0	0	320225	91862	343953	69761.6	277136	NA	58.99	1.103e+06	0	0	18607.2	0	0	1277.3	80109.5	239444	0	0	0	339439	97373.7	357711	77435.4	277136	NA	58.99	1.14915e+06	0	0	0	79106.7	0	0	114118	112402	94183.1
MEX	Industry	1998	0	0	18449	0	0	124	81854	227227	0	0	0	327654	92382	372324	70253.5	291909	NA	65.98	1.15459e+06	0	0	19555.9	0	0	131.44	86765.2	240861	0	0	0	347313	97924.9	387217	77981.4	291909	NA	65.98	1.20241e+06	0	0	0	85685.1	0	0	118916	109090	94442.8
MEX	Industry	1999	0	0	38249	0	0	519	53716	199542	0	0	0	292026	93263	337657	63817.7	310089	NA	73.98	1.09693e+06	0	0	40543.9	0	0	550.14	56939	211515	0	0	0	309548	98858.8	351163	70837.7	310089	NA	73.98	1.14057e+06	0	0	0	55877.9	0	0	124973	107759	95478.4
MEX	Industry	2000	0	0	41730	0	0	1540	49280	239290	0	0	0	331840	72120	480405	57678.9	336380	NA	84.99	1.27851e+06	0	0	44233.8	0	0	1632.4	52236.8	253647	0	0	0	351750	76447.2	499621	64023.6	336380	NA	84.99	1.32831e+06	0	0	0	51155.6	0	0	134125	128891	75662.8
MEX	Industry	2001	0	0	38470	0	0	2160	45920	222270	0	0	0	308820	63880	390048	48283.7	334800	NA	101.99	1.14593e+06	0	0	40778.2	0	0	2289.6	48675.2	235606	0	0	0	327349	67712.8	405650	53594.9	334800	NA	101.99	1.18921e+06	0	0	0	47572.8	0	0	133495	117167	66986.7
MEX	Industry	2002	0	0	39400	0	0	1700	44720	170540	0	0	0	256360	59200	468395	43238.7	345690	NA	112	1.173e+06	0	0	41764	0	0	1802	47403.2	180772	0	0	0	271742	62752	487131	47995	345690	NA	112	1.21542e+06	0	0	0	46406.8	0	0	137837	91976.2	62052.4
MEX	Industry	2003	0	0	37420	0	0	60	47520	163730	0	0	0	248730	66170	501337	45314.3	335210	NA	129.96	1.19689e+06	0	0	39665.2	0	0	63.6	50371.2	173554	0	0	0	263654	70140.2	521390	50298.9	335210	NA	129.96	1.24082e+06	0	0	0	49290	0	0	133658	87646.1	69440.6
MEX	Industry	2004	0	0	38510	0	0	110	56480	174990	0	0	0	270090	70050	565466	46891	343840	NA	144.99	1.29648e+06	0	0	40820.6	0	0	116.6	59868.8	185489	0	0	0	286295	74253	588085	52049	343840	NA	144.99	1.34467e+06	0	0	0	58628.6	0	0	137099	96083.7	72959.8
MEX	Industry	2005	0	0	37990	0	0	30	50980	157280	0	0	0	246280	67730	557726	58087.8	355090	NA	163.96	1.28508e+06	0	0	40269.4	0	0	31.8	54038.8	166717	0	0	0	261057	71793.8	580035	64477.5	355090	NA	163.96	1.33262e+06	0	0	0	52735	0	0	141585	86072	70744.4
MEX	Industry	2006	0	0	40070	0	0	40	49540	126040	0	0	0	215690	68080	610846	56823.1	367450	NA	183.97	1.31907e+06	0	0	42474.2	0	0	42.4	52512.4	133602	0	0	0	228631	72164.8	635280	63073.6	367450	NA	183.97	1.36678e+06	0	0	0	50880	0	0	146513	74088.7	71205.5
MEX	Industry	2007	0	0	43120	0	0	20	53290	123550	0	0	0	219980	67300	647406	53441.7	379960	NA	211.98	1.3683e+06	0	0	45707.2	0	0	21.2	56487.4	130963	0	0	0	233179	71338	673302	59320.3	379960	NA	211.98	1.41731e+06	0	0	0	54738.4	0	0	151501	73346.7	70548.3
MEX	Industry	2008	0	0	42100	0	0	0	58650	95650	0	0	0	196400	66990	622076	56964	383520	NA	260.96	1.32621e+06	0	0	44626	0	0	0	62169	101389	0	0	0	208184	71009.4	646959	63230.1	383520	NA	260.96	1.37316e+06	0	0	0	60367	0	0	152920	60266.3	70272.7
MEX	Industry	2009	0	0	41250	0	0	0	51070	84090	0	0	0	176410	65750	569086	43016.7	365780	NA	313.93	1.22036e+06	0	0	43725	0	0	0	54134.2	89135.4	0	0	0	186995	69695	591849	47748.6	365780	NA	313.93	1.26238e+06	0	0	0	52491.2	0	0	145847	55416.8	69069.6
MEX	Iron.and.steel	1971	0	0	0	0	0	0	3811	4937	0	0	0	8748	44087	35705	0	7331	NA	0	95871	0	0	0	0	0	0	4039.66	5233.22	0	0	0	9272.88	46732.2	37133.2	0	7331	NA	0	100469	0	0	0	4039.66	0	0	3545.81	5233.22	46732.2
MEX	Iron.and.steel	1972	0	0	0	0	0	0	4420	5725	0	0	0	10145	48831	41404	0	8505	NA	0	108885	0	0	0	0	0	0	4685.2	6068.5	0	0	0	10753.7	51760.9	43060.2	0	8505	NA	0	114080	0	0	0	4685.2	0	0	4135.14	6068.5	51760.9
MEX	Iron.and.steel	1973	0	0	0	0	0	0	4748	6150	0	0	0	10898	56108	44481	0	9313	NA	0	120800	0	0	0	0	0	0	5032.88	6519	0	0	0	11551.9	59474.5	46260.2	0	9313	NA	0	126600	0	0	0	5032.88	0	0	4551.57	6519	59474.5
MEX	Iron.and.steel	1974	0	0	0	0	0	0	5125	6638	0	0	0	11763	57937	48010	0	10880	NA	0	128590	0	0	0	0	0	0	5432.5	7036.28	0	0	0	12468.8	61413.2	49930.4	0	10880	NA	0	134692	0	0	0	5432.5	0	0	5345.01	7036.28	61413.2
MEX	Iron.and.steel	1975	0	0	0	0	0	0	5259	6812	0	0	0	12071	56492	49270	0	11210	NA	0	129043	0	0	0	0	0	0	5574.54	7220.72	0	0	0	12795.3	59881.5	51240.8	0	11210	NA	0	135128	0	0	0	5574.54	0	0	5535.62	7220.72	59881.5
MEX	Iron.and.steel	1976	0	0	0	0	0	0	5285	6845	0	0	0	12130	61095	49511	0	11318	NA	0	134054	0	0	0	0	0	0	5602.1	7255.7	0	0	0	12857.8	64760.7	51491.4	0	11318	NA	0	140428	0	0	0	5602.1	0	0	5617.76	7255.7	64760.7
MEX	Iron.and.steel	1977	0	0	0	0	0	0	5587	7237	0	0	0	12824	65764	52344	0	12344	NA	0	143276	0	0	0	0	0	0	5922.22	7671.22	0	0	0	13593.4	69709.8	54437.8	0	12344	NA	0	150085	0	0	0	5922.22	0	0	6158.49	7671.22	69709.8
MEX	Iron.and.steel	1978	0	0	0	0	0	0	6759	8754	0	0	0	15513	69239	63316	0	14588	NA	0	162656	0	0	0	0	0	0	7164.54	9279.24	0	0	0	16443.8	73393.3	65848.6	0	14588	NA	0	170274	0	0	0	7164.54	0	0	7315.29	9279.24	73393.3
MEX	Iron.and.steel	1979	0	0	0	0	0	0	7100	9196	0	0	0	16296	69947	66510	0	15350	NA	0	168103	0	0	0	0	0	0	7526	9747.76	0	0	0	17273.8	74143.8	69170.4	0	15350	NA	0	175938	0	0	0	7526	0	0	7736.68	9747.76	74143.8
MEX	Iron.and.steel	1980	0	0	0	0	0	0	7138	9246	0	0	0	16384	63816	66872	0	15417	NA	0	162489	0	0	0	0	0	0	7566.28	9800.76	0	0	0	17367	67645	69546.9	0	15417	NA	0	169976	0	0	0	7566.28	0	0	7809.96	9800.76	67645
MEX	Iron.and.steel	1981	0	0	0	0	0	0	7644	9901	0	0	0	17545	67940	71610	0	16539	NA	0	173634	0	0	0	0	0	0	8102.64	10495.1	0	0	0	18597.7	72016.4	74474.4	0	16539	NA	0	181628	0	0	0	8102.64	0	0	8282.19	10495.1	72016.4
MEX	Iron.and.steel	1982	0	0	0	0	0	0	7039	9117	0	0	0	16156	64388	65938	0	15229	NA	0	161711	0	0	0	0	0	0	7461.34	9664.02	0	0	0	17125.4	68251.3	68575.5	0	15229	NA	0	169181	0	0	0	7461.34	0	0	7536.31	9664.02	68251.3
MEX	Iron.and.steel	1983	0	0	0	0	0	0	6961	9016	0	0	0	15977	63376	65209	0	15063	NA	0	159625	0	0	0	0	0	0	7378.66	9556.96	0	0	0	16935.6	67178.6	67817.4	0	15063	NA	0	166995	0	0	0	7378.66	0	0	7363.93	9556.96	67178.6
MEX	Iron.and.steel	1984	0	0	0	0	0	0	7541	9768	0	0	0	17309	63738	70648	0	16337	NA	0	168032	0	0	0	0	0	0	7993.46	10354.1	0	0	0	18347.5	67562.3	73473.9	0	16337	NA	0	175721	0	0	0	7993.46	0	0	7887.4	10354.1	67562.3
MEX	Iron.and.steel	1985	0	0	0	0	0	0	7381	9560	0	0	0	16941	64439	69143	0	16126	NA	0	166649	0	0	0	0	0	0	7823.86	10133.6	0	0	0	17957.5	68305.3	71908.7	0	16126	NA	0	174298	0	0	0	7823.86	0	0	7685.97	10133.6	68305.3
MEX	Iron.and.steel	1986	0	0	0	0	0	0	7207	9335	0	0	0	16542	60891	67517	0	13679	NA	0	158629	0	0	0	0	0	0	7639.42	9895.1	0	0	0	17534.5	64544.5	70217.7	0	13679	NA	0	165976	0	0	0	7639.42	0	0	6433.94	9895.1	64544.5
MEX	Iron.and.steel	1987	0	0	80	0	0	0	7406	10011	0	0	0	17497	66654	75460	0	15197	NA	0	174808	0	0	84.8	0	0	0	7850.36	10611.7	0	0	0	18546.8	70653.2	78478.4	0	15197	NA	0	182875	0	0	0	7850.36	0	0	7051.22	10696.5	70653.2
MEX	Iron.and.steel	1988	0	0	2088	0	0	0	1607	24441	0	0	0	28136	64914	95759	0	26027	NA	0	214836	0	0	2213.28	0	0	0	1703.42	25907.5	0	0	0	29824.2	68808.8	99589.4	0	26027	NA	0	224249	0	0	0	1703.42	0	0	11908	28120.7	68808.8
MEX	Iron.and.steel	1989	0	0	4725	0	0	0	2009	26573	0	0	0	33307	63377	74820	0	29134	NA	0	200638	0	0	5008.5	0	0	0	2129.54	28167.4	0	0	0	35305.4	67179.6	77812.8	0	29134	NA	0	209432	0	0	0	2129.54	0	0	13138.3	33175.9	67179.6
MEX	Iron.and.steel	1990	0	0	1257	0	0	0	780	26414	0	0	0	28451	56468	80280	0	29477	NA	0	194676	0	0	1332.42	0	0	0	826.8	27998.8	0	0	0	30158.1	59856.1	83491.2	0	29477	NA	0	202982	0	0	0	826.8	0	0	13096.5	29331.3	59856.1
MEX	Iron.and.steel	1991	0	0	931	0	0	0	680	24668	0	0	0	26279	50880	77959	0	23844	NA	0	178962	0	0	986.86	0	0	0	720.8	26148.1	0	0	0	27855.7	53932.8	81077.4	0	23844	NA	0	186710	0	0	0	720.8	0	0	10478.5	27134.9	53932.8
MEX	Iron.and.steel	1992	0	0	338	0	0	0	879	13969	0	0	0	15186	58461	76602	0	23982	NA	0	174231	0	0	358.28	0	0	0	931.74	14807.1	0	0	0	16097.2	61968.7	79666.1	0	23982	NA	0	181714	0	0	0	931.74	0	0	10424.8	15165.4	61968.7
MEX	Iron.and.steel	1993	0	0	298	0	0	0	871	17246	0	0	0	18415	58874	71687	0	18816	NA	0	167792	0	0	315.88	0	0	0	923.26	18280.8	0	0	0	19519.9	62406.4	74554.5	0	18816	NA	0	175297	0	0	0	923.26	0	0	8090.61	18596.6	62406.4
MEX	Iron.and.steel	1994	0	0	334	0	0	0	974	19235	0	0	0	20543	65664	74804	0	20985	NA	0	181996	0	0	354.04	0	0	0	1032.44	20389.1	0	0	0	21775.6	69603.8	77796.2	0	20985	NA	0	190161	0	0	0	1032.44	0	0	8925.82	20743.1	69603.8
MEX	Iron.and.steel	1995	0	0	397	0	0	0	1183	19967	0	0	0	21547	75063	78781	0	25372	NA	0	200763	0	0	420.82	0	0	0	1253.98	21165	0	0	0	22839.8	79566.8	81932.2	0	25372	NA	0	209711	0	0	0	1253.98	0	0	10675.6	21585.8	79566.8
MEX	Iron.and.steel	1996	0	0	426	0	0	0	1245	23250	0	0	0	24921	79840	103741	0	26900	NA	0	235402	0	0	451.56	0	0	0	1319.7	24645	0	0	0	26416.3	84630.4	107891	0	26900	NA	0	245837	0	0	0	1319.7	0	0	11196.9	25096.6	84630.4
MEX	Iron.and.steel	1997	0	0	439	0	0	0	1282	23941	0	0	0	25662	85842	112620	0	27699	NA	0	251823	0	0	465.34	0	0	0	1358.92	25377.5	0	0	0	27201.7	90992.5	117125	0	27699	NA	0	263018	0	0	0	1358.92	0	0	11405.8	25842.8	90992.5
MEX	Iron.and.steel	1998	0	0	439	0	0	0	1282	23933	0	0	0	25654	85812	115785	0	27689	NA	0	254940	0	0	465.34	0	0	0	1358.92	25369	0	0	0	27193.2	90960.7	120416	0	27689	NA	0	266259	0	0	0	1358.92	0	0	11279.7	25834.3	90960.7
MEX	Iron.and.steel	1999	0	0	908	0	0	0	1284	20828	0	0	0	23020	86885	106301	0	31040	NA	0	247246	0	0	962.48	0	0	0	1361.04	22077.7	0	0	0	24401.2	92098.1	110553	0	31040	NA	0	258092	0	0	0	1361.04	0	0	12509.9	23040.2	92098.1
MEX	Iron.and.steel	2000	0	0	10	0	0	0	1220	16540	0	0	0	17770	70640	144535	0	26920	NA	0	259865	0	0	10.6	0	0	0	1293.2	17532.4	0	0	0	18836.2	74878.4	150316	0	26920	NA	0	270951	0	0	0	1293.2	0	0	10733.8	17543	74878.4
MEX	Iron.and.steel	2001	0	0	10	0	0	0	1070	13140	0	0	0	14220	62510	107168	0	21980	NA	0	205878	0	0	10.6	0	0	0	1134.2	13928.4	0	0	0	15073.2	66260.6	111455	0	21980	NA	0	214769	0	0	0	1134.2	0	0	8764.08	13939	66260.6
MEX	Iron.and.steel	2002	0	0	10	0	0	0	960	10520	0	0	0	11490	57880	98985	0	20720	NA	0	189075	0	0	10.6	0	0	0	1017.6	11151.2	0	0	0	12179.4	61352.8	102944	0	20720	NA	0	197197	0	0	0	1017.6	0	0	8261.67	11161.8	61352.8
MEX	Iron.and.steel	2003	0	0	10	0	0	0	960	10710	0	0	0	11680	64850	100767	0	18860	NA	0	196157	0	0	10.6	0	0	0	1017.6	11352.6	0	0	0	12380.8	68741	104798	0	18860	NA	0	204779	0	0	0	1017.6	0	0	7520.03	11363.2	68741
MEX	Iron.and.steel	2004	0	0	10	0	0	0	1070	12210	0	0	0	13290	67610	118726	0	24780	NA	0	224406	0	0	10.6	0	0	0	1134.2	12942.6	0	0	0	14087.4	71666.6	123475	0	24780	NA	0	234009	0	0	0	1134.2	0	0	9880.5	12953.2	71666.6
MEX	Iron.and.steel	2005	0	0	10	0	0	0	930	9580	0	0	0	10520	65750	112296	0	24490	NA	0	213056	0	0	10.6	0	0	0	985.8	10154.8	0	0	0	11151.2	69695	116788	0	24490	NA	0	222124	0	0	0	985.8	0	0	9764.87	10165.4	69695
MEX	Iron.and.steel	2006	0	0	10	0	0	0	800	8300	0	0	0	9110	66270	116016	0	25400	NA	0	216796	0	0	10.6	0	0	0	848	8798	0	0	0	9656.6	70246.2	120657	0	25400	NA	0	225959	0	0	0	848	0	0	10127.7	8808.6	70246.2
MEX	Iron.and.steel	2007	0	0	10	0	0	0	1060	8530	0	0	0	9600	65810	123306	0	26460	NA	0	225176	0	0	10.6	0	0	0	1123.6	9041.8	0	0	0	10176	69758.6	128238	0	26460	NA	0	234633	0	0	0	1123.6	0	0	10550.3	9052.4	69758.6
MEX	Iron.and.steel	2008	0	0	10	0	0	0	1010	7980	0	0	0	9000	65600	134606	0	27380	NA	0	236586	0	0	10.6	0	0	0	1070.6	8458.8	0	0	0	9540	69536	139990	0	27380	NA	0	246446	0	0	0	1070.6	0	0	10917.2	8469.4	69536
MEX	Iron.and.steel	2009	0	0	10	0	0	0	740	7530	0	0	0	8280	64570	113416	0	26100	NA	0	212366	0	0	10.6	0	0	0	784.4	7981.8	0	0	0	8776.8	68444.2	117953	0	26100	NA	0	221274	0	0	0	784.4	0	0	10406.8	7992.4	68444.2
MEX	Chemical.and.petrochemical	1971	0	0	847	0	0	0	2807	15802	0	0	0	19456	0	20922	0	3223	NA	0	43601	0	0	897.82	0	0	0	2975.42	16750.1	0	0	0	20623.4	0	21758.9	0	3223	NA	0	45605.2	0	0	0	2975.42	0	0	1558.88	8823.97	0
MEX	Chemical.and.petrochemical	1972	0	0	931	0	0	0	3087	17377	0	0	0	21395	0	23007	0	3546	NA	0	47948	0	0	986.86	0	0	0	3272.22	18419.6	0	0	0	22678.7	0	23927.3	0	3546	NA	0	50152	0	0	0	3272.22	0	0	1724.07	9703.24	0
MEX	Chemical.and.petrochemical	1973	0	0	1014	0	0	0	3361	17728	0	0	0	22103	0	25050	0	3935	NA	0	51088	0	0	1074.84	0	0	0	3562.66	18791.7	0	0	0	23429.2	0	26052	0	3935	NA	0	53416.2	0	0	0	3562.66	0	0	1923.17	9933.26	0
MEX	Chemical.and.petrochemical	1974	0	0	1102	0	0	0	3652	20558	0	0	0	25312	0	27219	0	4628	NA	0	57159	0	0	1168.12	0	0	0	3871.12	21791.5	0	0	0	26830.7	0	28307.8	0	4628	NA	0	59766.5	0	0	0	3871.12	0	0	2273.6	11479.8	0
MEX	Chemical.and.petrochemical	1975	0	0	1189	0	0	0	3943	22196	0	0	0	27328	0	29387	0	5016	NA	0	61731	0	0	1260.34	0	0	0	4179.58	23527.8	0	0	0	28967.7	0	30562.5	0	5016	NA	0	64546.2	0	0	0	4179.58	0	0	2476.95	12394	0
MEX	Chemical.and.petrochemical	1976	0	0	1277	0	0	0	4233	23833	0	0	0	29343	0	31555	0	5412	NA	0	66310	0	0	1353.62	0	0	0	4486.98	25263	0	0	0	31103.6	0	32817.2	0	5412	NA	0	69332.8	0	0	0	4486.98	0	0	2686.28	13308.3	0
MEX	Chemical.and.petrochemical	1977	0	0	1360	0	0	0	4507	25376	0	0	0	31243	0	33598	0	5945	NA	0	70786	0	0	1441.6	0	0	0	4777.42	26898.6	0	0	0	33117.6	0	34941.9	0	5945	NA	0	74004.5	0	0	0	4777.42	0	0	2965.99	14170.1	0
MEX	Chemical.and.petrochemical	1978	0	0	1416	0	0	0	4692	26416	0	0	0	32524	0	34975	0	6046	NA	0	73545	0	0	1500.96	0	0	0	4973.52	28001	0	0	0	34475.4	0	36374	0	6046	NA	0	76895.4	0	0	0	4973.52	0	0	3031.83	14751	0
MEX	Chemical.and.petrochemical	1979	0	0	1500	0	0	0	4972	27991	0	0	0	34463	0	37060	0	6417	NA	0	77940	0	0	1590	0	0	0	5270.32	29670.5	0	0	0	36530.8	0	38542.4	0	6417	NA	0	81490.2	0	0	0	5270.32	0	0	3234.29	15630.2	0
MEX	Chemical.and.petrochemical	1980	0	0	1597	0	0	0	5292	29795	0	0	0	36684	0	39449	0	6823	NA	0	82956	0	0	1692.82	0	0	0	5609.52	31582.7	0	0	0	38885	0	41027	0	6823	NA	0	86735	0	0	0	5609.52	0	0	3456.4	16637.8	0
MEX	Chemical.and.petrochemical	1981	0	0	1697	0	0	0	5625	31670	0	0	0	38992	0	41932	0	7266	NA	0	88190	0	0	1798.82	0	0	0	5962.5	33570.2	0	0	0	41331.5	0	43609.3	0	7266	NA	0	92206.8	0	0	0	5962.5	0	0	3638.57	17684.5	0
MEX	Chemical.and.petrochemical	1982	0	0	1785	0	0	0	5916	33308	0	0	0	41009	0	44100	0	7641	NA	0	92750	0	0	1892.1	0	0	0	6270.96	35306.5	0	0	0	43469.5	0	45864	0	7641	NA	0	96974.5	0	0	0	6270.96	0	0	3781.27	18599.3	0
MEX	Chemical.and.petrochemical	1983	0	0	1873	0	0	0	6207	34945	0	0	0	43025	0	46268	0	8018	NA	0	97311	0	0	1985.38	0	0	0	6579.42	37041.7	0	0	0	45606.5	0	48118.7	0	8018	NA	0	101743	0	0	0	6579.42	0	0	3919.8	19513.5	0
MEX	Chemical.and.petrochemical	1984	0	0	1960	0	0	0	6498	36583	0	0	0	45041	0	48436	0	8403	NA	0	101880	0	0	2077.6	0	0	0	6887.88	38778	0	0	0	47743.5	0	50373.4	0	8403	NA	0	106520	0	0	0	6887.88	0	0	4056.92	20427.8	0
MEX	Chemical.and.petrochemical	1985	0	0	2048	0	0	0	6789	38220	0	0	0	47057	0	50604	0	8854	NA	0	106515	0	0	2170.88	0	0	0	7196.34	40513.2	0	0	0	49880.4	0	52628.2	0	8854	NA	0	111363	0	0	0	7196.34	0	0	4219.99	21342	0
MEX	Chemical.and.petrochemical	1986	0	0	2136	0	0	0	7080	39858	0	0	0	49074	0	52773	0	8022	NA	0	109869	0	0	2264.16	0	0	0	7504.8	42249.5	0	0	0	52018.4	0	54883.9	0	8022	NA	0	114924	0	0	0	7504.8	0	0	3773.16	22256.8	0
MEX	Chemical.and.petrochemical	1987	0	0	1332	0	0	0	1965	44993	0	0	0	48290	0	42926	0	8999	NA	0	100215	0	0	1411.92	0	0	0	2082.9	47692.6	0	0	0	51187.4	0	44643	0	8999	NA	0	104829	0	0	0	2082.9	0	0	4175.42	24552.2	0
MEX	Chemical.and.petrochemical	1988	0	0	199	0	0	0	1571	34178	0	0	0	35948	0	46386	0	14522	NA	0	96856	0	0	210.94	0	0	0	1665.26	36228.7	0	0	0	38104.9	0	48241.4	0	14522	NA	0	100868	0	0	0	1665.26	0	0	6644.18	18219.8	0
MEX	Chemical.and.petrochemical	1989	0	0	171	0	0	0	1853	35916	0	0	0	37940	0	46830	0	15475	NA	0	100245	0	0	181.26	0	0	0	1964.18	38071	0	0	0	40216.4	0	48703.2	0	15475	NA	0	104395	0	0	0	1964.18	0	0	6978.64	19126.1	0
MEX	Chemical.and.petrochemical	1990	0	0	183	0	0	0	1488	35324	0	0	0	36995	0	51235	0	16080	NA	0	104310	0	0	193.98	0	0	0	1577.28	37443.4	0	0	0	39214.7	0	53284.4	0	16080	NA	0	108579	0	0	0	1577.28	0	0	7144.3	18818.7	0
MEX	Chemical.and.petrochemical	1991	0	0	493	0	0	0	3981	39043	0	0	0	43517	0	51160	0	14823	NA	0	109500	0	0	522.58	0	0	0	4219.86	41385.6	0	0	0	46128	0	53206.4	0	14823	NA	0	114157	0	0	0	4219.86	0	0	6514.13	20954.1	0
MEX	Chemical.and.petrochemical	1992	0	0	501	0	0	0	4188	38991	0	0	0	43680	0	52769	0	16438	NA	0	112887	0	0	531.06	0	0	0	4439.28	41330.5	0	0	0	46300.8	0	54879.8	0	16438	NA	0	117619	0	0	0	4439.28	0	0	7145.45	20930.8	0
MEX	Chemical.and.petrochemical	1993	0	0	509	0	0	0	4252	39576	0	0	0	44337	0	48002	0	16686	NA	0	109025	0	0	539.54	0	0	0	4507.12	41950.6	0	0	0	46997.2	0	49922.1	0	16686	NA	0	113605	0	0	0	4507.12	0	0	7174.74	21245	0
MEX	Chemical.and.petrochemical	1994	0	0	569	0	0	0	4769	44404	0	0	0	49742	0	50390	0	18720	NA	0	118852	0	0	603.14	0	0	0	5055.14	47068.2	0	0	0	52726.5	0	52405.6	0	18720	NA	0	123852	0	0	0	5055.14	0	0	7962.41	23835.7	0
MEX	Chemical.and.petrochemical	1995	0	0	558	0	0	0	4745	39299	0	0	0	44602	0	46315	0	18355	NA	0	109272	0	0	591.48	0	0	0	5029.7	41656.9	0	0	0	47278.1	0	48167.6	0	18355	NA	0	113801	0	0	0	5029.7	0	0	7723.07	21124.2	0
MEX	Chemical.and.petrochemical	1996	0	0	583	0	0	0	4959	42909	0	0	0	48451	0	60163	0	19181	NA	0	127795	0	0	617.98	0	0	0	5256.54	45483.5	0	0	0	51358.1	0	62569.5	0	19181	NA	0	133109	0	0	0	5256.54	0	0	7983.9	23050.8	0
MEX	Chemical.and.petrochemical	1997	0	0	614	0	0	0	5219	45159	0	0	0	50992	0	66753	0	20187	NA	0	137932	0	0	650.84	0	0	0	5532.14	47868.5	0	0	0	54051.5	0	69423.1	0	20187	NA	0	143662	0	0	0	5532.14	0	0	8312.55	24259.7	0
MEX	Chemical.and.petrochemical	1998	0	0	637	0	0	0	5413	46836	0	0	0	52886	0	71518	0	20936	NA	0	145340	0	0	675.22	0	0	0	5737.78	49646.2	0	0	0	56059.2	0	74378.7	0	20936	NA	0	151374	0	0	0	5737.78	0	0	8528.75	25160.7	0
MEX	Chemical.and.petrochemical	1999	0	0	1356	0	0	0	5585	41983	0	0	0	48924	0	80585	0	21801	NA	0	151310	0	0	1437.36	0	0	0	5920.1	44502	0	0	0	51859.4	0	83808.4	0	21801	NA	0	157469	0	0	0	5920.1	0	0	8786.32	22969.7	0
MEX	Chemical.and.petrochemical	2000	0	0	770	0	0	0	4950	38110	0	0	0	43830	0	98610	0	21880	NA	0	164320	0	0	816.2	0	0	0	5247	40396.6	0	0	0	46459.8	0	102554	0	21880	NA	0	170894	0	0	0	5247	0	0	8724.21	20606.4	0
MEX	Chemical.and.petrochemical	2001	0	0	650	0	0	0	4150	32000	0	0	0	36800	0	78380	0	18370	NA	0	133550	0	0	689	0	0	0	4399	33920	0	0	0	39008	0	81515.2	0	18370	NA	0	138893	0	0	0	4399	0	0	7324.66	17304.5	0
MEX	Chemical.and.petrochemical	2002	0	0	620	0	0	0	3860	27260	0	0	0	31740	0	78520	0	17650	NA	0	127910	0	0	657.2	0	0	0	4091.6	28895.6	0	0	0	33644.4	0	81660.8	0	17650	NA	0	132955	0	0	0	4091.6	0	0	7037.57	14776.4	0
MEX	Chemical.and.petrochemical	2003	0	0	640	0	0	0	4000	15090	0	0	0	19730	0	84040	0	18270	NA	0	122040	0	0	678.4	0	0	0	4240	15995.4	0	0	0	20913.8	0	87401.6	0	18270	NA	0	126585	0	0	0	4240	0	0	7284.78	8336.9	0
MEX	Chemical.and.petrochemical	2004	0	0	640	0	0	0	4030	15190	0	0	0	19860	0	82600	0	18400	NA	0	120860	0	0	678.4	0	0	0	4271.8	16101.4	0	0	0	21051.6	0	85904	0	18400	NA	0	125356	0	0	0	4271.8	0	0	7336.61	8389.9	0
MEX	Chemical.and.petrochemical	2005	0	0	620	0	0	0	3890	14680	0	0	0	19190	0	84420	0	17780	NA	0	121390	0	0	657.2	0	0	0	4123.4	15560.8	0	0	0	20341.4	0	87796.8	0	17780	NA	0	125918	0	0	0	4123.4	0	0	7089.4	8109	0
MEX	Chemical.and.petrochemical	2006	0	0	720	0	0	0	4850	11350	0	0	0	16920	0	63070	0	18400	NA	0	98390	0	0	763.2	0	0	0	5141	12031	0	0	0	17935.2	0	65592.8	0	18400	NA	0	101928	0	0	0	5141	0	0	7336.6	6397.1	0
MEX	Chemical.and.petrochemical	2007	0	0	810	0	0	0	5150	12060	0	0	0	18020	0	67260	0	19020	NA	0	104300	0	0	858.6	0	0	0	5459	12783.6	0	0	0	19101.2	0	69950.4	0	19020	NA	0	108072	0	0	0	5459	0	0	7583.81	6821.1	0
MEX	Chemical.and.petrochemical	2008	0	0	820	0	0	0	5370	9390	0	0	0	15580	0	65770	0	18780	NA	0	100130	0	0	869.2	0	0	0	5692.2	9953.4	0	0	0	16514.8	0	68400.8	0	18780	NA	0	103696	0	0	0	5692.2	0	0	7488.11	5411.3	0
MEX	Chemical.and.petrochemical	2009	0	0	810	0	0	0	4880	8210	0	0	0	13900	0	50100	0	17900	NA	0	81900	0	0	858.6	0	0	0	5172.8	8702.6	0	0	0	14734	0	52104	0	17900	NA	0	84738	0	0	0	5172.8	0	0	7137.23	4780.6	0
MEX	Non.ferrous.metals	1971	0	0	10	0	0	27	19	5	0	0	0	61	0	585	0	1360	NA	0	2006	0	0	10.6	0	0	28.62	20.14	5.3	0	0	0	64.66	0	608.4	0	1360	NA	0	2033.06	0	0	0	20.14	0	0	657.796	22.26	0
MEX	Non.ferrous.metals	1972	0	0	10	0	0	26	19	5	0	0	0	60	0	578	0	1344	NA	0	1982	0	0	10.6	0	0	27.56	20.14	5.3	0	0	0	63.6	0	601.12	0	1344	NA	0	2008.72	0	0	0	20.14	0	0	653.454	21.73	0
MEX	Non.ferrous.metals	1973	0	0	9	0	0	26	19	5	0	0	0	59	0	573	0	1359	NA	0	1991	0	0	9.54	0	0	27.56	20.14	5.3	0	0	0	62.54	0	595.92	0	1359	NA	0	2017.46	0	0	0	20.14	0	0	664.188	21.2	0
MEX	Non.ferrous.metals	1974	0	0	10	0	0	27	20	5	0	0	0	62	0	603	0	1546	NA	0	2211	0	0	10.6	0	0	28.62	21.2	5.3	0	0	0	65.72	0	627.12	0	1546	NA	0	2238.84	0	0	0	21.2	0	0	759.503	22.26	0
MEX	Non.ferrous.metals	1975	0	0	10	0	0	27	19	5	0	0	0	61	0	585	0	1507	NA	0	2153	0	0	10.6	0	0	28.62	20.14	5.3	0	0	0	64.66	0	608.4	0	1507	NA	0	2180.06	0	0	0	20.14	0	0	744.173	22.26	0
MEX	Non.ferrous.metals	1976	0	0	10	0	0	28	21	5	0	0	0	64	0	622	0	1609	NA	0	2295	0	0	10.6	0	0	29.68	22.26	5.3	0	0	0	67.84	0	646.88	0	1609	NA	0	2323.72	0	0	0	22.26	0	0	798.637	22.79	0
MEX	Non.ferrous.metals	1977	0	0	10	0	0	29	21	5	0	0	0	65	0	626	0	1672	NA	0	2363	0	0	10.6	0	0	30.74	22.26	5.3	0	0	0	68.9	0	651.04	0	1672	NA	0	2391.94	0	0	0	22.26	0	0	834.17	23.32	0
MEX	Non.ferrous.metals	1978	0	0	10	0	0	29	21	5	0	0	0	65	0	632	0	1649	NA	0	2346	0	0	10.6	0	0	30.74	22.26	5.3	0	0	0	68.9	0	657.28	0	1649	NA	0	2375.18	0	0	0	22.26	0	0	826.907	23.32	0
MEX	Non.ferrous.metals	1979	0	0	10	0	0	29	21	5	0	0	0	65	0	634	0	1655	NA	0	2354	0	0	10.6	0	0	30.74	22.26	5.3	0	0	0	68.9	0	659.36	0	1655	NA	0	2383.26	0	0	0	22.26	0	0	834.15	23.32	0
MEX	Non.ferrous.metals	1980	0	0	12	0	0	34	25	6	0	0	0	77	0	752	0	1963	NA	0	2792	0	0	12.72	0	0	36.04	26.5	6.36	0	0	0	81.62	0	782.08	0	1963	NA	0	2826.7	0	0	0	26.5	0	0	994.419	27.56	0
MEX	Non.ferrous.metals	1981	0	0	15	0	0	41	30	7	0	0	0	93	0	902	0	2358	NA	0	3353	0	0	15.9	0	0	43.46	31.8	7.42	0	0	0	98.58	0	938.08	0	2358	NA	0	3394.66	0	0	0	31.8	0	0	1180.81	33.39	0
MEX	Non.ferrous.metals	1982	0	0	18	0	0	49	36	9	0	0	0	112	0	1081	0	2826	NA	0	4019	0	0	19.08	0	0	51.94	38.16	9.54	0	0	0	118.72	0	1124.24	0	2826	NA	0	4068.96	0	0	0	38.16	0	0	1398.49	40.28	0
MEX	Non.ferrous.metals	1983	0	0	21	0	0	59	43	11	0	0	0	134	0	1296	0	3390	NA	0	4820	0	0	22.26	0	0	62.54	45.58	11.66	0	0	0	142.04	0	1347.84	0	3390	NA	0	4879.88	0	0	0	45.58	0	0	1657.29	48.23	0
MEX	Non.ferrous.metals	1984	0	0	26	0	0	71	51	13	0	0	0	161	0	1554	0	4069	NA	0	5784	0	0	27.56	0	0	75.26	54.06	13.78	0	0	0	170.66	0	1616.16	0	4069	NA	0	5855.82	0	0	0	54.06	0	0	1964.49	58.3	0
MEX	Non.ferrous.metals	1985	0	0	31	0	0	85	62	15	0	0	0	193	0	1864	0	4921	NA	0	6978	0	0	32.86	0	0	90.1	65.72	15.9	0	0	0	204.58	0	1938.56	0	4921	NA	0	7064.14	0	0	0	65.72	0	0	2345.45	69.43	0
MEX	Non.ferrous.metals	1986	0	0	16	0	0	44	32	8	0	0	0	100	0	961	0	2204	NA	0	3265	0	0	16.96	0	0	46.64	33.92	8.48	0	0	0	106	0	999.44	0	2204	NA	0	3309.44	0	0	0	33.92	0	0	1036.66	36.04	0
MEX	Non.ferrous.metals	1987	0	0	8	0	0	0	36	0	0	0	0	44	0	377	0	4041	NA	0	4462	0	0	8.48	0	0	0	38.16	0	0	0	0	46.64	0	392.08	0	4041	NA	0	4479.72	0	0	0	38.16	0	0	1874.97	4.24	0
MEX	Non.ferrous.metals	1988	0	0	8	0	0	0	40	4	0	0	0	52	0	1255	0	4471	NA	0	5778	0	0	8.48	0	0	0	42.4	4.24	0	0	0	55.12	0	1305.2	0	4471	NA	0	5831.32	0	0	0	42.4	0	0	2045.59	6.36	0
MEX	Non.ferrous.metals	1989	0	0	0	0	0	0	76	8	0	0	0	84	0	1598	0	4571	NA	0	6253	0	0	0	0	0	0	80.56	8.48	0	0	0	89.04	0	1661.92	0	4571	NA	0	6321.96	0	0	0	80.56	0	0	2061.35	4.24	0
MEX	Non.ferrous.metals	1990	0	0	32	0	0	0	489	0	0	0	0	521	0	1605	0	4241	NA	0	6367	0	0	33.92	0	0	0	518.34	0	0	0	0	552.26	0	1669.2	0	4241	NA	0	6462.46	0	0	0	518.34	0	0	1884.26	16.96	0
MEX	Non.ferrous.metals	1991	0	0	91	0	0	0	8	0	0	0	0	99	0	1846	0	3215	NA	0	5160	0	0	96.46	0	0	0	8.48	0	0	0	0	104.94	0	1919.84	0	3215	NA	0	5239.78	0	0	0	8.48	0	0	1412.87	48.23	0
MEX	Non.ferrous.metals	1992	0	0	127	0	0	0	4	0	0	0	0	131	0	2623	0	795	NA	0	3549	0	0	134.62	0	0	0	4.24	0	0	0	0	138.86	0	2727.92	0	795	NA	0	3661.78	0	0	0	4.24	0	0	345.579	67.31	0
MEX	Non.ferrous.metals	1993	0	0	107	0	0	0	0	0	0	0	0	107	0	2471	0	820	NA	0	3398	0	0	113.42	0	0	0	0	0	0	0	0	113.42	0	2569.84	0	820	NA	0	3503.26	0	0	0	0	0	0	352.588	56.71	0
MEX	Non.ferrous.metals	1994	0	0	135	0	0	0	0	0	0	0	0	135	0	2897	0	1030	NA	0	4062	0	0	143.1	0	0	0	0	0	0	0	0	143.1	0	3012.88	0	1030	NA	0	4185.98	0	0	0	0	0	0	438.103	71.55	0
MEX	Non.ferrous.metals	1995	0	0	98	0	0	0	0	0	0	0	0	98	0	2575	0	750	NA	0	3423	0	0	103.88	0	0	0	0	0	0	0	0	103.88	0	2678	0	750	NA	0	3531.88	0	0	0	0	0	0	315.571	51.94	0
MEX	Non.ferrous.metals	1996	0	0	135	0	0	0	0	0	0	0	0	135	0	3436	0	1047	NA	0	4618	0	0	143.1	0	0	0	0	0	0	0	0	143.1	0	3573.44	0	1047	NA	0	4763.54	0	0	0	0	0	0	435.803	71.55	0
MEX	Non.ferrous.metals	1997	0	0	174	0	0	0	0	0	0	0	0	174	0	4612	0	1332	NA	0	6118	0	0	184.44	0	0	0	0	0	0	0	0	184.44	0	4796.48	0	1332	NA	0	6312.92	0	0	0	0	0	0	548.488	92.22	0
MEX	Non.ferrous.metals	1998	0	0	159	0	0	0	0	0	0	0	0	159	0	4336	0	1218	NA	0	5713	0	0	168.54	0	0	0	0	0	0	0	0	168.54	0	4509.44	0	1218	NA	0	5895.98	0	0	0	0	0	0	496.18	84.27	0
MEX	Non.ferrous.metals	1999	0	0	313	0	0	0	0	0	0	0	0	313	0	3792	0	1173	NA	0	5278	0	0	331.78	0	0	0	0	0	0	0	0	331.78	0	3943.68	0	1173	NA	0	5448.46	0	0	0	0	0	0	472.747	165.89	0
MEX	Non.ferrous.metals	2000	0	0	30	0	0	0	10	0	0	0	0	40	0	1750	0	4160	NA	0	5950	0	0	31.8	0	0	0	10.6	0	0	0	0	42.4	0	1820	0	4160	NA	0	6022.4	0	0	0	10.6	0	0	1658.72	15.9	0
MEX	Non.ferrous.metals	2001	0	0	40	0	0	0	10	0	0	0	0	50	0	1550	0	3500	NA	0	5100	0	0	42.4	0	0	0	10.6	0	0	0	0	53	0	1612	0	3500	NA	0	5165	0	0	0	10.6	0	0	1395.55	21.2	0
MEX	Non.ferrous.metals	2002	0	0	40	0	0	0	10	0	0	0	0	50	0	1450	0	3390	NA	0	4890	0	0	42.4	0	0	0	10.6	0	0	0	0	53	0	1508	0	3390	NA	0	4951	0	0	0	10.6	0	0	1351.69	21.2	0
MEX	Non.ferrous.metals	2003	0	0	40	0	0	0	10	0	0	0	0	50	0	1430	0	3150	NA	0	4630	0	0	42.4	0	0	0	10.6	0	0	0	0	53	0	1487.2	0	3150	NA	0	4690.2	0	0	0	10.6	0	0	1256	21.2	0
MEX	Non.ferrous.metals	2004	0	0	30	0	0	0	10	0	0	0	0	40	0	1350	0	2940	NA	0	4330	0	0	31.8	0	0	0	10.6	0	0	0	0	42.4	0	1404	0	2940	NA	0	4386.4	0	0	0	10.6	0	0	1172.26	15.9	0
MEX	Non.ferrous.metals	2005	0	0	30	0	0	0	10	0	0	0	0	40	0	1230	0	2960	NA	0	4230	0	0	31.8	0	0	0	10.6	0	0	0	0	42.4	0	1279.2	0	2960	NA	0	4281.6	0	0	0	10.6	0	0	1180.24	15.9	0
MEX	Non.ferrous.metals	2006	0	0	40	0	0	0	10	0	0	0	0	50	0	1160	0	3060	NA	0	4270	0	0	42.4	0	0	0	10.6	0	0	0	0	53	0	1206.4	0	3060	NA	0	4319.4	0	0	0	10.6	0	0	1220.11	21.2	0
MEX	Non.ferrous.metals	2007	0	0	40	0	0	0	10	0	0	0	0	50	0	1190	0	3160	NA	0	4400	0	0	42.4	0	0	0	10.6	0	0	0	0	53	0	1237.6	0	3160	NA	0	4450.6	0	0	0	10.6	0	0	1259.98	21.2	0
MEX	Non.ferrous.metals	2008	0	0	40	0	0	0	10	0	0	0	0	50	0	1180	0	3110	NA	0	4340	0	0	42.4	0	0	0	10.6	0	0	0	0	53	0	1227.2	0	3110	NA	0	4390.2	0	0	0	10.6	0	0	1240.04	21.2	0
MEX	Non.ferrous.metals	2009	0	0	40	0	0	0	10	0	0	0	0	50	0	1070	0	2960	NA	0	4080	0	0	42.4	0	0	0	10.6	0	0	0	0	53	0	1112.8	0	2960	NA	0	4125.8	0	0	0	10.6	0	0	1180.23	21.2	0
MEX	Non.metallic.minerals	1971	0	0	4	0	0	0	1465	26390	0	0	0	27859	427	18494	0	4428	NA	0	51208	0	0	4.24	0	0	0	1552.9	27973.4	0	0	0	29530.5	452.62	19233.8	0	4428	NA	0	53644.9	0	0	0	1552.9	0	0	2141.7	13988.8	226.31
MEX	Non.metallic.minerals	1972	0	0	5	0	0	0	1509	30826	0	0	0	32340	439	19641	0	4996	NA	0	57416	0	0	5.3	0	0	0	1599.54	32675.6	0	0	0	34280.4	465.34	20426.6	0	4996	NA	0	60168.4	0	0	0	1599.54	0	0	2429.06	16340.4	232.67
MEX	Non.metallic.minerals	1973	0	0	6	0	0	0	1985	28940	0	0	0	30931	578	24931	0	6018	NA	0	62458	0	0	6.36	0	0	0	2104.1	30676.4	0	0	0	32786.9	612.68	25928.2	0	6018	NA	0	65345.8	0	0	0	2104.1	0	0	2941.2	15341.4	306.34
MEX	Non.metallic.minerals	1974	0	0	5	0	0	0	1626	37958	0	0	0	39589	474	21936	0	6562	NA	0	68561	0	0	5.3	0	0	0	1723.56	40235.5	0	0	0	41964.3	502.44	22813.4	0	6562	NA	0	71842.2	0	0	0	1723.56	0	0	3223.71	20120.4	251.22
MEX	Non.metallic.minerals	1975	0	0	6	0	0	0	2108	41616	0	0	0	43730	615	27209	0	7541	NA	0	79095	0	0	6.36	0	0	0	2234.48	44113	0	0	0	46353.8	651.9	28297.4	0	7541	NA	0	82844.1	0	0	0	2234.48	0	0	3723.83	22059.7	325.95
MEX	Non.metallic.minerals	1976	0	0	7	0	0	0	2296	45100	0	0	0	47403	669	29595	0	8222	NA	0	85889	0	0	7.42	0	0	0	2433.76	47806	0	0	0	50247.2	709.14	30778.8	0	8222	NA	0	89957.1	0	0	0	2433.76	0	0	4081.04	23906.7	354.57
MEX	Non.metallic.minerals	1977	0	0	8	0	0	0	2498	47409	0	0	0	49915	727	31924	0	9002	NA	0	91568	0	0	8.48	0	0	0	2647.88	50253.5	0	0	0	52909.9	770.62	33201	0	9002	NA	0	95883.5	0	0	0	2647.88	0	0	4491.15	25131	385.31
MEX	Non.metallic.minerals	1978	0	0	8	0	0	0	2742	50384	0	0	0	53134	799	34779	0	9432	NA	0	98144	0	0	8.48	0	0	0	2906.52	53407	0	0	0	56322	846.94	36170.2	0	9432	NA	0	102771	0	0	0	2906.52	0	0	4729.77	26707.8	423.47
MEX	Non.metallic.minerals	1979	0	0	9	0	0	0	2944	54405	0	0	0	57358	857	37395	0	10187	NA	0	105797	0	0	9.54	0	0	0	3120.64	57669.3	0	0	0	60799.5	908.42	38890.8	0	10187	NA	0	110786	0	0	0	3120.64	0	0	5134.43	28839.4	454.21
MEX	Non.metallic.minerals	1980	0	0	10	0	0	0	3217	58225	0	0	0	61452	937	40659	0	10955	NA	0	114003	0	0	10.6	0	0	0	3410.02	61718.5	0	0	0	65139.1	993.22	42285.4	0	10955	NA	0	119373	0	0	0	3410.02	0	0	5549.6	30864.6	496.61
MEX	Non.metallic.minerals	1981	0	0	9	0	0	0	2903	64415	0	0	0	67327	845	38613	0	11490	NA	0	118275	0	0	9.54	0	0	0	3077.18	68279.9	0	0	0	71366.6	895.7	40157.5	0	11490	NA	0	123910	0	0	0	3077.18	0	0	5753.81	34144.7	447.85
MEX	Non.metallic.minerals	1982	0	0	8	0	0	0	2622	69122	0	0	0	71752	764	36652	0	11841	NA	0	121009	0	0	8.48	0	0	0	2779.32	73269.3	0	0	0	76057.1	809.84	38118.1	0	11841	NA	0	126826	0	0	0	2779.32	0	0	5859.7	36638.9	404.92
MEX	Non.metallic.minerals	1983	0	0	8	0	0	0	2586	61147	0	0	0	63741	593	35013	0	10742	NA	0	110089	0	0	8.48	0	0	0	2741.16	64815.8	0	0	0	67565.5	628.58	36413.5	0	10742	NA	0	115350	0	0	0	2741.16	0	0	5251.5	32412.2	314.29
MEX	Non.metallic.minerals	1984	0	0	8	0	0	0	2669	66042	0	0	0	68719	638	36608	0	11490	NA	0	117455	0	0	8.48	0	0	0	2829.14	70004.5	0	0	0	72842.1	676.28	38072.3	0	11490	NA	0	123081	0	0	0	2829.14	0	0	5547.3	35006.5	338.14
MEX	Non.metallic.minerals	1985	0	0	9	0	0	0	2856	74075	0	0	0	76940	689	39725	0	12861	NA	0	130215	0	0	9.54	0	0	0	3027.36	78519.5	0	0	0	81556.4	730.34	41314	0	12861	NA	0	136462	0	0	0	3027.36	0	0	6129.81	39264.5	365.17
MEX	Non.metallic.minerals	1986	0	0	8	0	0	0	704	70743	0	0	0	71455	771	37177	0	10602	NA	0	120005	0	0	8.48	0	0	0	746.24	74987.6	0	0	0	75742.3	817.26	38664.1	0	10602	NA	0	125826	0	0	0	746.24	0	0	4986.67	37498	408.63
MEX	Non.metallic.minerals	1987	0	0	16	0	0	0	624	79227	0	0	0	79867	764	35865	0	11876	NA	0	128372	0	0	16.96	0	0	0	661.44	83980.6	0	0	0	84659	809.84	37299.6	0	11876	NA	0	134644	0	0	0	661.44	0	0	5510.31	41998.8	404.92
MEX	Non.metallic.minerals	1988	0	0	16	0	0	0	362	73258	0	0	0	73636	1091	31253	0	13264	NA	0	119244	0	0	16.96	0	0	0	383.72	77653.5	0	0	0	78054.2	1156.46	32503.1	0	13264	NA	0	124978	0	0	0	383.72	0	0	6068.61	38835.2	578.23
MEX	Non.metallic.minerals	1989	0	0	16	0	0	0	660	76944	0	0	0	77620	1182	27228	0	12574	NA	0	118604	0	0	16.96	0	0	0	699.6	81560.6	0	0	0	82277.2	1252.92	28317.1	0	12574	NA	0	124421	0	0	0	699.6	0	0	5670.4	40788.8	626.46
MEX	Non.metallic.minerals	1990	0	0	20	0	0	0	585	80906	0	0	0	81511	1014	30989	0	12283	NA	0	125797	0	0	21.2	0	0	0	620.1	85760.4	0	0	0	86401.7	1074.84	32228.6	0	12283	NA	0	131988	0	0	0	620.1	0	0	5457.3	42890.8	537.42
MEX	Non.metallic.minerals	1991	0	0	72	0	0	0	609	80449	0	0	0	81130	875	34222	0	14752	NA	0	130979	0	0	76.32	0	0	0	645.54	85275.9	0	0	0	85997.8	927.5	35590.9	0	14752	NA	0	137268	0	0	0	645.54	0	0	6482.93	42676.1	463.75
MEX	Non.metallic.minerals	1992	0	0	80	0	0	0	1285	82986	0	0	0	84351	887	39271	0	15120	NA	0	139629	0	0	84.8	0	0	0	1362.1	87965.2	0	0	0	89412.1	940.22	40841.8	0	15120	NA	0	146314	0	0	0	1362.1	0	0	6572.53	44025	470.11
MEX	Non.metallic.minerals	1993	0	0	84	0	0	0	1193	82628	0	0	0	83905	895	34251	0	15585	NA	0	134636	0	0	89.04	0	0	0	1264.58	87585.7	0	0	0	88939.3	948.7	35621	0	15585	NA	0	141094	0	0	0	1264.58	0	0	6701.32	43837.4	474.35
MEX	Non.metallic.minerals	1994	0	0	84	0	0	0	1555	83459	0	0	0	85098	903	28320	0	17506	NA	0	131827	0	0	89.04	0	0	0	1648.3	88466.5	0	0	0	90203.9	957.18	29452.8	0	17506	NA	0	138120	0	0	0	1648.3	0	0	7446.05	44277.8	478.59
MEX	Non.metallic.minerals	1995	0	0	76	0	0	0	994	71495	0	0	0	72565	855	24424	0	14246	NA	0	112090	0	0	80.56	0	0	0	1053.64	75784.7	0	0	0	76918.9	906.3	25401	0	14246	NA	0	117472	0	0	0	1053.64	0	0	5994.17	37932.6	453.15
MEX	Non.metallic.minerals	1996	0	0	88	0	0	0	1591	75745	0	0	0	77424	924	31194	0	15512	NA	0	125054	0	0	93.28	0	0	0	1686.46	80289.7	0	0	0	82069.4	979.44	32441.8	0	15512	NA	0	131003	0	0	0	1686.46	0	0	6456.72	40191.5	489.72
MEX	Non.metallic.minerals	1997	0	0	98	0	0	0	1771	75253	0	0	0	77122	1077	35316	0	15819	NA	0	129334	0	0	103.88	0	0	0	1877.26	79768.2	0	0	0	81749.3	1141.62	36728.6	0	15819	NA	0	135439	0	0	0	1877.26	0	0	6513.91	39936	570.81
MEX	Non.metallic.minerals	1998	0	0	98	0	0	0	1778	80467	0	0	0	82343	1081	37856	0	18062	NA	0	139342	0	0	103.88	0	0	0	1884.68	85295	0	0	0	87283.6	1145.86	39370.2	0	18062	NA	0	145862	0	0	0	1884.68	0	0	7357.96	42699.5	572.93
MEX	Non.metallic.minerals	1999	0	0	196	0	0	0	1850	71655	0	0	0	73701	1056	40712	0	18636	NA	0	134105	0	0	207.76	0	0	0	1961	75954.3	0	0	0	78123.1	1119.36	42340.5	0	18636	NA	0	140219	0	0	0	1961	0	0	7510.75	38081	559.68
MEX	Non.metallic.minerals	2000	0	0	110	0	0	0	120	58900	0	0	0	59130	0	61650	0	18540	NA	0	139320	0	0	116.6	0	0	0	127.2	62434	0	0	0	62677.8	0	64116	0	18540	NA	0	145334	0	0	0	127.2	0	0	7392.45	31275.3	0
MEX	Non.metallic.minerals	2001	0	0	100	0	0	0	120	42220	0	0	0	42440	0	75100	0	18600	NA	0	136140	0	0	106	0	0	0	127.2	44753.2	0	0	0	44986.4	0	78104	0	18600	NA	0	141690	0	0	0	127.2	0	0	7416.37	22429.6	0
MEX	Non.metallic.minerals	2002	0	0	110	0	0	0	120	29560	0	0	0	29790	0	98890	0	18630	NA	0	147310	0	0	116.6	0	0	0	127.2	31333.6	0	0	0	31577.4	0	102846	0	18630	NA	0	153053	0	0	0	127.2	0	0	7428.33	15725.1	0
MEX	Non.metallic.minerals	2003	0	0	90	0	0	0	100	23110	0	0	0	23300	0	98100	0	18030	NA	0	139430	0	0	95.4	0	0	0	106	24496.6	0	0	0	24698	0	102024	0	18030	NA	0	144752	0	0	0	106	0	0	7189.09	12296	0
MEX	Non.metallic.minerals	2004	0	0	100	0	0	0	120	29730	0	0	0	29950	1130	123880	0	19120	NA	0	174080	0	0	106	0	0	0	127.2	31513.8	0	0	0	31747	1197.8	128835	0	19120	NA	0	180900	0	0	0	127.2	0	0	7623.7	15809.9	598.9
MEX	Non.metallic.minerals	2005	0	0	100	0	0	0	110	22990	0	0	0	23200	650	122650	0	21870	NA	0	168370	0	0	106	0	0	0	116.6	24369.4	0	0	0	24592	689	127556	0	21870	NA	0	174707	0	0	0	116.6	0	0	8720.2	12237.7	344.5
MEX	Non.metallic.minerals	2006	0	0	120	0	0	0	140	20780	0	0	0	21040	450	150830	0	23340	NA	0	195660	0	0	127.2	0	0	0	148.4	22026.8	0	0	0	22302.4	477	156863	0	23340	NA	0	202983	0	0	0	148.4	0	0	9306.32	11077	238.5
MEX	Non.metallic.minerals	2007	0	0	130	0	0	0	150	18700	0	0	0	18980	130	169230	0	20620	NA	0	208960	0	0	137.8	0	0	0	159	19822	0	0	0	20118.8	137.8	175999	0	20620	NA	0	216876	0	0	0	159	0	0	8221.78	9979.9	68.9
MEX	Non.metallic.minerals	2008	0	0	140	0	0	0	160	11050	0	0	0	11350	10	153130	0	19030	NA	0	183520	0	0	148.4	0	0	0	169.6	11713	0	0	0	12031	10.6	159255	0	19030	NA	0	190327	0	0	0	169.6	0	0	7587.79	5930.7	5.3
MEX	Non.metallic.minerals	2009	0	0	140	0	0	0	150	10420	0	0	0	10710	10	147920	0	15070	NA	0	173710	0	0	148.4	0	0	0	159	11045.2	0	0	0	11352.6	10.6	153837	0	15070	NA	0	180270	0	0	0	159	0	0	6008.83	5596.8	5.3
MEX	Transport.equipment	1971	0	0	286	0	0	0	730	112	0	0	0	1128	0	2055	0	1975	NA	0	5158	0	0	303.16	0	0	0	773.8	118.72	0	0	0	1195.68	0	2137.2	0	1975	NA	0	5307.88	0	0	0	773.8	0	0	955.255	210.94	0
MEX	Transport.equipment	1972	0	0	311	0	0	0	793	122	0	0	0	1226	0	2233	0	2148	NA	0	5607	0	0	329.66	0	0	0	840.58	129.32	0	0	0	1299.56	0	2322.32	0	2148	NA	0	5769.88	0	0	0	840.58	0	0	1044.36	229.49	0
MEX	Transport.equipment	1973	0	0	387	0	0	0	986	119	0	0	0	1492	0	2776	0	2720	NA	0	6988	0	0	410.22	0	0	0	1045.16	126.14	0	0	0	1581.52	0	2887.04	0	2720	NA	0	7188.56	0	0	0	1045.16	0	0	1329.35	268.18	0
MEX	Transport.equipment	1974	0	0	475	0	0	0	1211	186	0	0	0	1872	0	3411	0	3618	NA	0	8901	0	0	503.5	0	0	0	1283.66	197.16	0	0	0	1984.32	0	3547.44	0	3618	NA	0	9149.76	0	0	0	1283.66	0	0	1777.41	350.33	0
MEX	Transport.equipment	1975	0	0	483	0	0	0	1231	189	0	0	0	1903	0	3466	0	3691	NA	0	9060	0	0	511.98	0	0	0	1304.86	200.34	0	0	0	2017.18	0	3604.64	0	3691	NA	0	9312.82	0	0	0	1304.86	0	0	1822.65	356.16	0
MEX	Transport.equipment	1976	0	0	440	0	0	0	1122	172	0	0	0	1734	0	3159	0	3380	NA	0	8273	0	0	466.4	0	0	0	1189.32	182.32	0	0	0	1838.04	0	3285.36	0	3380	NA	0	8503.4	0	0	0	1189.32	0	0	1677.68	324.36	0
MEX	Transport.equipment	1977	0	0	380	0	0	0	969	149	0	0	0	1498	0	2729	0	3013	NA	0	7240	0	0	402.8	0	0	0	1027.14	157.94	0	0	0	1587.88	0	2838.16	0	3013	NA	0	7439.04	0	0	0	1027.14	0	0	1503.2	280.37	0
MEX	Transport.equipment	1978	0	0	520	0	0	0	1326	204	0	0	0	2050	0	3734	0	4027	NA	0	9811	0	0	551.2	0	0	0	1405.56	216.24	0	0	0	2173	0	3883.36	0	4027	NA	0	10083.4	0	0	0	1405.56	0	0	2019.38	383.72	0
MEX	Transport.equipment	1979	0	0	602	0	0	0	1534	236	0	0	0	2372	0	4320	0	4667	NA	0	11359	0	0	638.12	0	0	0	1626.04	250.16	0	0	0	2514.32	0	4492.8	0	4667	NA	0	11674.1	0	0	0	1626.04	0	0	2352.25	444.14	0
MEX	Transport.equipment	1980	0	0	664	0	0	0	1691	260	0	0	0	2615	0	4763	0	5139	NA	0	12517	0	0	703.84	0	0	0	1792.46	275.6	0	0	0	2771.9	0	4953.52	0	5139	NA	0	12864.4	0	0	0	1792.46	0	0	2603.32	489.72	0
MEX	Transport.equipment	1981	0	0	809	0	0	0	2061	317	0	0	0	3187	0	5804	0	6274	NA	0	15265	0	0	857.54	0	0	0	2184.66	336.02	0	0	0	3378.22	0	6036.16	0	6274	NA	0	15688.4	0	0	0	2184.66	0	0	3141.81	596.78	0
MEX	Transport.equipment	1982	0	0	640	0	0	0	1631	251	0	0	0	2522	0	4594	0	4966	NA	0	12082	0	0	678.4	0	0	0	1728.86	266.06	0	0	0	2673.32	0	4777.76	0	4966	NA	0	12417.1	0	0	0	1728.86	0	0	2457.5	472.23	0
MEX	Transport.equipment	1983	0	0	387	0	0	0	985	151	0	0	0	1523	0	2775	0	3000	NA	0	7298	0	0	410.22	0	0	0	1044.1	160.06	0	0	0	1614.38	0	2886	0	3000	NA	0	7500.38	0	0	0	1044.1	0	0	1466.63	285.14	0
MEX	Transport.equipment	1984	0	0	485	0	0	0	1236	190	0	0	0	1911	0	3480	0	3766	NA	0	9157	0	0	514.1	0	0	0	1310.16	201.4	0	0	0	2025.66	0	3619.2	0	3766	NA	0	9410.86	0	0	0	1310.16	0	0	1818.2	357.75	0
MEX	Transport.equipment	1985	0	0	571	0	0	0	1456	224	0	0	0	2251	0	4100	0	4476	NA	0	10827	0	0	605.26	0	0	0	1543.36	237.44	0	0	0	2386.06	0	4264	0	4476	NA	0	11126.1	0	0	0	1543.36	0	0	2133.35	421.35	0
MEX	Transport.equipment	1986	0	0	444	0	0	0	1132	174	0	0	0	1750	0	3189	0	3024	NA	0	7963	0	0	470.64	0	0	0	1199.92	184.44	0	0	0	1855	0	3316.56	0	3024	NA	0	8195.56	0	0	0	1199.92	0	0	1422.34	327.54	0
MEX	Transport.equipment	1987	0	0	457	0	0	0	1165	179	0	0	0	1801	0	3282	0	3501	NA	0	8584	0	0	484.42	0	0	0	1234.9	189.74	0	0	0	1909.06	0	3413.28	0	3501	NA	0	8823.34	0	0	0	1234.9	0	0	1624.42	337.08	0
MEX	Transport.equipment	1988	0	0	676	0	0	0	231	0	0	0	0	907	0	1530	0	2298	NA	0	4735	0	0	716.56	0	0	0	244.86	0	0	0	0	961.42	0	1591.2	0	2298	NA	0	4850.62	0	0	0	244.86	0	0	1051.39	358.28	0
MEX	Transport.equipment	1989	0	0	847	0	0	0	247	64	0	0	0	1158	0	1733	0	2625	NA	0	5516	0	0	897.82	0	0	0	261.82	67.84	0	0	0	1227.48	0	1802.32	0	2625	NA	0	5654.8	0	0	0	261.82	0	0	1183.78	482.83	0
MEX	Transport.equipment	1990	0	0	1146	0	0	0	255	56	0	0	0	1457	0	1745	0	2918	NA	0	6120	0	0	1214.76	0	0	0	270.3	59.36	0	0	0	1544.42	0	1814.8	0	2918	NA	0	6277.22	0	0	0	270.3	0	0	1296.46	637.06	0
MEX	Transport.equipment	1991	0	0	871	0	0	0	414	0	0	0	0	1285	0	1748	0	2390	NA	0	5423	0	0	923.26	0	0	0	438.84	0	0	0	0	1362.1	0	1817.92	0	2390	NA	0	5570.02	0	0	0	438.84	0	0	1050.31	461.63	0
MEX	Transport.equipment	1992	0	0	951	0	0	0	314	0	0	0	0	1265	0	1470	0	3148	NA	0	5883	0	0	1008.06	0	0	0	332.84	0	0	0	0	1340.9	0	1528.8	0	3148	NA	0	6017.7	0	0	0	332.84	0	0	1368.41	504.03	0
MEX	Transport.equipment	1993	0	0	1305	0	0	0	310	0	0	0	0	1615	0	1830	0	3269	NA	0	6714	0	0	1383.3	0	0	0	328.6	0	0	0	0	1711.9	0	1903.2	0	3269	NA	0	6884.1	0	0	0	328.6	0	0	1405.62	691.65	0
MEX	Transport.equipment	1994	0	0	1309	0	0	0	310	0	0	0	0	1619	0	1719	0	3282	NA	0	6620	0	0	1387.54	0	0	0	328.6	0	0	0	0	1716.14	0	1787.76	0	3282	NA	0	6785.9	0	0	0	328.6	0	0	1395.97	693.77	0
MEX	Transport.equipment	1995	0	0	891	0	0	0	184	0	0	0	0	1075	0	1490	0	2722	NA	0	5287	0	0	944.46	0	0	0	195.04	0	0	0	0	1139.5	0	1549.6	0	2722	NA	0	5411.1	0	0	0	195.04	0	0	1145.31	472.23	0
MEX	Transport.equipment	1996	0	0	1159	0	0	0	239	0	0	0	0	1398	0	2409	0	3541	NA	0	7348	0	0	1228.54	0	0	0	253.34	0	0	0	0	1481.88	0	2505.36	0	3541	NA	0	7528.24	0	0	0	253.34	0	0	1473.91	614.27	0
MEX	Transport.equipment	1997	0	0	1286	0	0	0	265	0	0	0	0	1551	0	2818	0	3928	NA	0	8297	0	0	1363.16	0	0	0	280.9	0	0	0	0	1644.06	0	2930.72	0	3928	NA	0	8502.78	0	0	0	280.9	0	0	1617.46	681.58	0
MEX	Transport.equipment	1998	0	0	1395	0	0	0	287	0	0	0	0	1682	0	3143	0	4260	NA	0	9085	0	0	1478.7	0	0	0	304.22	0	0	0	0	1782.92	0	3268.72	0	4260	NA	0	9311.64	0	0	0	304.22	0	0	1735.41	739.35	0
MEX	Transport.equipment	1999	0	0	3126	0	0	0	311	0	0	0	0	3437	0	3126	0	4668	NA	0	11231	0	0	3313.56	0	0	0	329.66	0	0	0	0	3643.22	0	3251.04	0	4668	NA	0	11562.3	0	0	0	329.66	0	0	1881.31	1656.78	0
MEX	Transport.equipment	2000	0	0	1600	0	0	0	310	0	0	0	0	1910	0	2010	0	4750	NA	0	8670	0	0	1696	0	0	0	328.6	0	0	0	0	2024.6	0	2090.4	0	4750	NA	0	8865	0	0	0	328.6	0	0	1893.97	848	0
MEX	Transport.equipment	2001	0	0	1580	0	0	0	40	0	0	0	0	1620	0	1970	0	5350	NA	0	8940	0	0	1674.8	0	0	0	42.4	0	0	0	0	1717.2	0	2048.8	0	5350	NA	0	9116	0	0	0	42.4	0	0	2133.2	837.4	0
MEX	Transport.equipment	2002	0	0	880	0	0	0	20	0	0	0	0	900	0	1850	0	5340	NA	0	8090	0	0	932.8	0	0	0	21.2	0	0	0	0	954	0	1924	0	5340	NA	0	8218	0	0	0	21.2	0	0	2129.21	466.4	0
MEX	Transport.equipment	2003	0	0	240	0	0	0	350	0	0	0	0	590	0	1600	0	5800	NA	0	7990	0	0	254.4	0	0	0	371	0	0	0	0	625.4	0	1664	0	5800	NA	0	8089.4	0	0	0	371	0	0	2312.63	127.2	0
MEX	Transport.equipment	2004	0	0	250	0	0	0	350	0	0	0	0	600	0	1560	0	5910	NA	0	8070	0	0	265	0	0	0	371	0	0	0	0	636	0	1622.4	0	5910	NA	0	8168.4	0	0	0	371	0	0	2356.49	132.5	0
MEX	Transport.equipment	2005	0	0	260	0	0	0	370	0	0	0	0	630	0	1680	0	6260	NA	0	8570	0	0	275.6	0	0	0	392.2	0	0	0	0	667.8	0	1747.2	0	6260	NA	0	8675	0	0	0	392.2	0	0	2496.04	137.8	0
MEX	Transport.equipment	2006	0	0	320	0	0	0	500	0	0	0	0	820	0	2050	0	6540	NA	0	9410	0	0	339.2	0	0	0	530	0	0	0	0	869.2	0	2132	0	6540	NA	0	9541.2	0	0	0	530	0	0	2607.68	169.6	0
MEX	Transport.equipment	2007	0	0	370	0	0	0	540	0	0	0	0	910	0	2150	0	6760	NA	0	9820	0	0	392.2	0	0	0	572.4	0	0	0	0	964.6	0	2236	0	6760	NA	0	9960.6	0	0	0	572.4	0	0	2695.4	196.1	0
MEX	Transport.equipment	2008	0	0	400	0	0	0	600	0	0	0	0	1000	0	2240	0	7050	NA	0	10290	0	0	424	0	0	0	636	0	0	0	0	1060	0	2329.6	0	7050	NA	0	10439.6	0	0	0	636	0	0	2811.03	212	0
MEX	Transport.equipment	2009	0	0	410	0	0	0	550	0	0	0	0	960	0	2070	0	6670	NA	0	9700	0	0	434.6	0	0	0	583	0	0	0	0	1017.6	0	2152.8	0	6670	NA	0	9840.4	0	0	0	583	0	0	2659.51	217.3	0
MEX	Machinery	1971	0	0	0	0	0	0	0	0	0	0	0	0	0	0	0	0	NA	0	0	0	0	0	0	0	0	0	0	0	0	0	0	0	0	0	0	NA	0	0	0	0	0	0	0	0	0	0	0
MEX	Machinery	1972	0	0	0	0	0	0	0	0	0	0	0	0	0	0	0	0	NA	0	0	0	0	0	0	0	0	0	0	0	0	0	0	0	0	0	0	NA	0	0	0	0	0	0	0	0	0	0	0
MEX	Machinery	1973	0	0	0	0	0	0	0	0	0	0	0	0	0	0	0	0	NA	0	0	0	0	0	0	0	0	0	0	0	0	0	0	0	0	0	0	NA	0	0	0	0	0	0	0	0	0	0	0
MEX	Machinery	1974	0	0	0	0	0	0	0	0	0	0	0	0	0	0	0	0	NA	0	0	0	0	0	0	0	0	0	0	0	0	0	0	0	0	0	0	NA	0	0	0	0	0	0	0	0	0	0	0
MEX	Machinery	1975	0	0	0	0	0	0	0	0	0	0	0	0	0	0	0	0	NA	0	0	0	0	0	0	0	0	0	0	0	0	0	0	0	0	0	0	NA	0	0	0	0	0	0	0	0	0	0	0
MEX	Machinery	1976	0	0	0	0	0	0	0	0	0	0	0	0	0	0	0	0	NA	0	0	0	0	0	0	0	0	0	0	0	0	0	0	0	0	0	0	NA	0	0	0	0	0	0	0	0	0	0	0
MEX	Machinery	1977	0	0	0	0	0	0	0	0	0	0	0	0	0	0	0	0	NA	0	0	0	0	0	0	0	0	0	0	0	0	0	0	0	0	0	0	NA	0	0	0	0	0	0	0	0	0	0	0
MEX	Machinery	1978	0	0	0	0	0	0	0	0	0	0	0	0	0	0	0	0	NA	0	0	0	0	0	0	0	0	0	0	0	0	0	0	0	0	0	0	NA	0	0	0	0	0	0	0	0	0	0	0
MEX	Machinery	1979	0	0	0	0	0	0	0	0	0	0	0	0	0	0	0	0	NA	0	0	0	0	0	0	0	0	0	0	0	0	0	0	0	0	0	0	NA	0	0	0	0	0	0	0	0	0	0	0
MEX	Machinery	1980	0	0	0	0	0	0	0	0	0	0	0	0	0	0	0	0	NA	0	0	0	0	0	0	0	0	0	0	0	0	0	0	0	0	0	0	NA	0	0	0	0	0	0	0	0	0	0	0
MEX	Machinery	1981	0	0	0	0	0	0	0	0	0	0	0	0	0	0	0	0	NA	0	0	0	0	0	0	0	0	0	0	0	0	0	0	0	0	0	0	NA	0	0	0	0	0	0	0	0	0	0	0
MEX	Machinery	1982	0	0	0	0	0	0	0	0	0	0	0	0	0	0	0	0	NA	0	0	0	0	0	0	0	0	0	0	0	0	0	0	0	0	0	0	NA	0	0	0	0	0	0	0	0	0	0	0
MEX	Machinery	1983	0	0	0	0	0	0	0	0	0	0	0	0	0	0	0	0	NA	0	0	0	0	0	0	0	0	0	0	0	0	0	0	0	0	0	0	NA	0	0	0	0	0	0	0	0	0	0	0
MEX	Machinery	1984	0	0	0	0	0	0	0	0	0	0	0	0	0	0	0	0	NA	0	0	0	0	0	0	0	0	0	0	0	0	0	0	0	0	0	0	NA	0	0	0	0	0	0	0	0	0	0	0
MEX	Machinery	1985	0	0	0	0	0	0	0	0	0	0	0	0	0	0	0	0	NA	0	0	0	0	0	0	0	0	0	0	0	0	0	0	0	0	0	0	NA	0	0	0	0	0	0	0	0	0	0	0
MEX	Machinery	1986	0	0	0	0	0	0	0	0	0	0	0	0	0	0	0	0	NA	0	0	0	0	0	0	0	0	0	0	0	0	0	0	0	0	0	0	NA	0	0	0	0	0	0	0	0	0	0	0
MEX	Machinery	1987	0	0	0	0	0	0	0	0	0	0	0	0	0	0	0	0	NA	0	0	0	0	0	0	0	0	0	0	0	0	0	0	0	0	0	0	NA	0	0	0	0	0	0	0	0	0	0	0
MEX	Machinery	1988	0	0	0	0	0	0	0	0	0	0	0	0	0	0	0	0	NA	0	0	0	0	0	0	0	0	0	0	0	0	0	0	0	0	0	0	NA	0	0	0	0	0	0	0	0	0	0	0
MEX	Machinery	1989	0	0	0	0	0	0	0	0	0	0	0	0	0	0	0	0	NA	0	0	0	0	0	0	0	0	0	0	0	0	0	0	0	0	0	0	NA	0	0	0	0	0	0	0	0	0	0	0
MEX	Machinery	1990	0	0	0	0	0	0	0	0	0	0	0	0	0	0	0	0	NA	0	0	0	0	0	0	0	0	0	0	0	0	0	0	0	0	0	0	NA	0	0	0	0	0	0	0	0	0	0	0
MEX	Machinery	1991	0	0	0	0	0	0	0	0	0	0	0	0	0	0	0	0	NA	0	0	0	0	0	0	0	0	0	0	0	0	0	0	0	0	0	0	NA	0	0	0	0	0	0	0	0	0	0	0
MEX	Machinery	1992	0	0	0	0	0	0	0	0	0	0	0	0	0	0	0	0	NA	0	0	0	0	0	0	0	0	0	0	0	0	0	0	0	0	0	0	NA	0	0	0	0	0	0	0	0	0	0	0
MEX	Machinery	1993	0	0	0	0	0	0	0	0	0	0	0	0	0	0	0	0	NA	0	0	0	0	0	0	0	0	0	0	0	0	0	0	0	0	0	0	NA	0	0	0	0	0	0	0	0	0	0	0
MEX	Machinery	1994	0	0	0	0	0	0	0	0	0	0	0	0	0	0	0	0	NA	0	0	0	0	0	0	0	0	0	0	0	0	0	0	0	0	0	0	NA	0	0	0	0	0	0	0	0	0	0	0
MEX	Machinery	1995	0	0	0	0	0	0	0	0	0	0	0	0	0	0	0	0	NA	0	0	0	0	0	0	0	0	0	0	0	0	0	0	0	0	0	0	NA	0	0	0	0	0	0	0	0	0	0	0
MEX	Machinery	1996	0	0	0	0	0	0	0	0	0	0	0	0	0	0	0	0	NA	0	0	0	0	0	0	0	0	0	0	0	0	0	0	0	0	0	0	NA	0	0	0	0	0	0	0	0	0	0	0
MEX	Machinery	1997	0	0	0	0	0	0	0	0	0	0	0	0	0	0	0	0	NA	0	0	0	0	0	0	0	0	0	0	0	0	0	0	0	0	0	0	NA	0	0	0	0	0	0	0	0	0	0	0
MEX	Machinery	1998	0	0	0	0	0	0	0	0	0	0	0	0	0	0	0	0	NA	0	0	0	0	0	0	0	0	0	0	0	0	0	0	0	0	0	0	NA	0	0	0	0	0	0	0	0	0	0	0
MEX	Machinery	1999	0	0	0	0	0	0	0	0	0	0	0	0	0	0	0	0	NA	0	0	0	0	0	0	0	0	0	0	0	0	0	0	0	0	0	0	NA	0	0	0	0	0	0	0	0	0	0	0
MEX	Machinery	2000	0	0	0	0	0	0	0	0	0	0	0	0	0	0	0	0	NA	0	0	0	0	0	0	0	0	0	0	0	0	0	0	0	0	0	0	NA	0	0	0	0	0	0	0	0	0	0	0
MEX	Machinery	2001	0	0	0	0	0	0	0	0	0	0	0	0	0	0	0	0	NA	0	0	0	0	0	0	0	0	0	0	0	0	0	0	0	0	0	0	NA	0	0	0	0	0	0	0	0	0	0	0
MEX	Machinery	2002	0	0	0	0	0	0	0	0	0	0	0	0	0	0	0	0	NA	0	0	0	0	0	0	0	0	0	0	0	0	0	0	0	0	0	0	NA	0	0	0	0	0	0	0	0	0	0	0
MEX	Machinery	2003	0	0	0	0	0	0	0	0	0	0	0	0	0	0	0	0	NA	0	0	0	0	0	0	0	0	0	0	0	0	0	0	0	0	0	0	NA	0	0	0	0	0	0	0	0	0	0	0
MEX	Machinery	2004	0	0	0	0	0	0	0	0	0	0	0	0	0	0	0	0	NA	0	0	0	0	0	0	0	0	0	0	0	0	0	0	0	0	0	0	NA	0	0	0	0	0	0	0	0	0	0	0
MEX	Machinery	2005	0	0	0	0	0	0	0	0	0	0	0	0	0	0	0	0	NA	0	0	0	0	0	0	0	0	0	0	0	0	0	0	0	0	0	0	NA	0	0	0	0	0	0	0	0	0	0	0
MEX	Machinery	2006	0	0	0	0	0	0	0	0	0	0	0	0	0	0	0	0	NA	0	0	0	0	0	0	0	0	0	0	0	0	0	0	0	0	0	0	NA	0	0	0	0	0	0	0	0	0	0	0
MEX	Machinery	2007	0	0	0	0	0	0	0	0	0	0	0	0	0	0	0	0	NA	0	0	0	0	0	0	0	0	0	0	0	0	0	0	0	0	0	0	NA	0	0	0	0	0	0	0	0	0	0	0
MEX	Machinery	2008	0	0	0	0	0	0	0	0	0	0	0	0	0	0	0	0	NA	0	0	0	0	0	0	0	0	0	0	0	0	0	0	0	0	0	0	NA	0	0	0	0	0	0	0	0	0	0	0
MEX	Machinery	2009	0	0	0	0	0	0	0	0	0	0	0	0	0	0	0	0	NA	0	0	0	0	0	0	0	0	0	0	0	0	0	0	0	0	0	0	NA	0	0	0	0	0	0	0	0	0	0	0
MEX	Mining.and.quarrying	1971	0	0	89	0	0	0	7026	4157	0	0	0	11272	89	11008	0	10501	NA	0	32870	0	0	94.34	0	0	0	7447.56	4406.42	0	0	0	11948.3	94.34	11448.3	0	10501	NA	0	33992	0	0	0	7447.56	0	0	5079.05	2250.38	47.17
MEX	Mining.and.quarrying	1972	0	0	97	0	0	0	7639	4519	0	0	0	12255	97	11969	0	11423	NA	0	35744	0	0	102.82	0	0	0	8097.34	4790.14	0	0	0	12990.3	102.82	12447.8	0	11423	NA	0	36963.9	0	0	0	8097.34	0	0	5553.87	2446.48	51.41
MEX	Mining.and.quarrying	1973	0	0	97	0	0	0	7653	4528	0	0	0	12278	97	11992	0	11665	NA	0	36032	0	0	102.82	0	0	0	8112.18	4799.68	0	0	0	13014.7	102.82	12471.7	0	11665	NA	0	37254.2	0	0	0	8112.18	0	0	5701.07	2451.25	51.41
MEX	Mining.and.quarrying	1974	0	0	110	0	0	0	8689	5141	0	0	0	13940	110	13614	0	14334	NA	0	41998	0	0	116.6	0	0	0	9210.34	5449.46	0	0	0	14776.4	116.6	14158.6	0	14334	NA	0	43385.6	0	0	0	9210.34	0	0	7041.86	2783.03	58.3
MEX	Mining.and.quarrying	1975	0	0	114	0	0	0	9047	5353	0	0	0	14514	114	14176	0	14985	NA	0	43789	0	0	120.84	0	0	0	9589.82	5674.18	0	0	0	15384.8	120.84	14743	0	14985	NA	0	45233.7	0	0	0	9589.82	0	0	7399.75	2897.51	60.42
MEX	Mining.and.quarrying	1976	0	0	116	0	0	0	9110	5390	0	0	0	14616	115	14273	0	15160	NA	0	44164	0	0	122.96	0	0	0	9656.6	5713.4	0	0	0	15493	121.9	14843.9	0	15160	NA	0	45618.8	0	0	0	9656.6	0	0	7524.76	2918.18	60.95
MEX	Mining.and.quarrying	1977	0	0	116	0	0	0	9172	5427	0	0	0	14715	116	14371	0	15747	NA	0	44949	0	0	122.96	0	0	0	9722.32	5752.62	0	0	0	15597.9	122.96	14945.8	0	15747	NA	0	46413.7	0	0	0	9722.32	0	0	7856.27	2937.79	61.48
MEX	Mining.and.quarrying	1978	0	0	105	0	0	0	8302	4912	0	0	0	13319	105	13008	0	13925	NA	0	40357	0	0	111.3	0	0	0	8800.12	5206.72	0	0	0	14118.1	111.3	13528.3	0	13925	NA	0	41682.8	0	0	0	8800.12	0	0	6982.83	2659.01	55.65
MEX	Mining.and.quarrying	1979	0	0	106	0	0	0	8355	4943	0	0	0	13404	106	13090	0	14037	NA	0	40637	0	0	112.36	0	0	0	8856.3	5239.58	0	0	0	14208.2	112.36	13613.6	0	14037	NA	0	41971.2	0	0	0	8856.3	0	0	7074.9	2675.97	56.18
MEX	Mining.and.quarrying	1980	0	0	107	0	0	0	8466	5009	0	0	0	13582	107	13265	0	14208	NA	0	41162	0	0	113.42	0	0	0	8973.96	5309.54	0	0	0	14396.9	113.42	13795.6	0	14208	NA	0	42513.9	0	0	0	8973.96	0	0	7197.51	2711.48	56.71
MEX	Mining.and.quarrying	1981	0	0	104	0	0	0	8221	4864	0	0	0	13189	104	12881	0	13823	NA	0	39997	0	0	110.24	0	0	0	8714.26	5155.84	0	0	0	13980.3	110.24	13396.2	0	13823	NA	0	41309.8	0	0	0	8714.26	0	0	6922.1	2633.04	55.12
MEX	Mining.and.quarrying	1982	0	0	98	0	0	0	7771	4598	0	0	0	12467	98	12177	0	13066	NA	0	37808	0	0	103.88	0	0	0	8237.26	4873.88	0	0	0	13215	103.88	12664.1	0	13066	NA	0	39049	0	0	0	8237.26	0	0	6465.91	2488.88	51.94
MEX	Mining.and.quarrying	1983	0	0	94	0	0	0	7461	4414	0	0	0	11969	74	11690	0	12547	NA	0	36280	0	0	99.64	0	0	0	7908.66	4678.84	0	0	0	12687.1	78.44	12157.6	0	12547	NA	0	37470.2	0	0	0	7908.66	0	0	6133.92	2389.24	39.22
MEX	Mining.and.quarrying	1984	0	0	91	0	0	0	7180	4248	0	0	0	11519	75	11250	0	12087	NA	0	34931	0	0	96.46	0	0	0	7610.8	4502.88	0	0	0	12210.1	79.5	11700	0	12087	NA	0	36076.6	0	0	0	7610.8	0	0	5835.53	2299.67	39.75
MEX	Mining.and.quarrying	1985	0	0	85	0	0	0	6722	3977	0	0	0	10784	2379	10532	0	11412	NA	0	35107	0	0	90.1	0	0	0	7125.32	4215.62	0	0	0	11431	2521.74	10953.3	0	11412	NA	0	36318.1	0	0	0	7125.32	0	0	5439.19	2152.86	1260.87
MEX	Mining.and.quarrying	1986	0	0	97	0	0	0	7688	4549	0	0	0	12334	3238	12046	0	11340	NA	0	38958	0	0	102.82	0	0	0	8149.28	4821.94	0	0	0	13074	3432.28	12527.8	0	11340	NA	0	40374.2	0	0	0	8149.28	0	0	5333.79	2462.38	1716.14
MEX	Mining.and.quarrying	1987	0	0	103	0	0	0	8182	4841	0	0	0	13126	2100	12819	0	13572	NA	0	41617	0	0	109.18	0	0	0	8672.92	5131.46	0	0	0	13913.6	2226	13331.8	0	13572	NA	0	43043.3	0	0	0	8672.92	0	0	6297.24	2620.32	1113
MEX	Mining.and.quarrying	1988	0	0	103	0	0	0	8082	4845	0	0	0	13030	2554	12579	0	14361	NA	0	42524	0	0	109.18	0	0	0	8566.92	5135.7	0	0	0	13811.8	2707.24	13082.2	0	14361	NA	0	43962.2	0	0	0	8566.92	0	0	6570.51	2622.44	1353.62
MEX	Mining.and.quarrying	1989	0	0	28	0	0	0	3997	6089	0	0	0	10114	2056	14831	0	19180	NA	0	46181	0	0	29.68	0	0	0	4236.82	6454.34	0	0	0	10720.8	2179.36	15424.2	0	19180	NA	0	47504.4	0	0	0	4236.82	0	0	8649.45	3242.01	1089.68
MEX	Mining.and.quarrying	1990	0	0	605	0	0	0	4789	7545	0	0	0	12939	6754	17006	0	17185	NA	0	53884	0	0	641.3	0	0	0	5076.34	7997.7	0	0	0	13715.3	7159.24	17686.2	0	17185	NA	0	55745.8	0	0	0	5076.34	0	0	7635.24	4319.5	3579.62
MEX	Mining.and.quarrying	1991	0	0	792	0	0	0	4510	6340	0	0	0	11642	3874	20408	0	15028	NA	0	50952	0	0	839.52	0	0	0	4780.6	6720.4	0	0	0	12340.5	4106.44	21224.3	0	15028	NA	0	52699.3	0	0	0	4780.6	0	0	6604.22	3779.96	2053.22
MEX	Mining.and.quarrying	1992	0	0	1090	0	0	0	3838	5461	0	0	0	10389	3842	21961	0	15342	NA	0	51534	0	0	1155.4	0	0	0	4068.28	5788.66	0	0	0	11012.3	4072.52	22839.4	0	15342	NA	0	53266.3	0	0	0	4068.28	0	0	6669.03	3472.03	2036.26
MEX	Mining.and.quarrying	1993	0	0	1146	0	0	0	3973	5700	0	0	0	10819	4041	20705	0	16140	NA	0	51705	0	0	1214.76	0	0	0	4211.38	6042	0	0	0	11468.1	4283.46	21533.2	0	16140	NA	0	53424.8	0	0	0	4211.38	0	0	6939.97	3628.38	2141.73
MEX	Mining.and.quarrying	1994	0	0	1189	0	0	0	4129	5922	0	0	0	11240	4200	20133	0	16778	NA	0	52351	0	0	1260.34	0	0	0	4376.74	6277.32	0	0	0	11914.4	4452	20938.3	0	16778	NA	0	54082.7	0	0	0	4376.74	0	0	7136.4	3768.83	2226
MEX	Mining.and.quarrying	1995	0	0	2116	0	0	0	4849	5174	0	0	0	12139	4554	20207	0	18920	NA	0	55820	0	0	2242.96	0	0	0	5139.94	5484.44	0	0	0	12867.3	4827.24	21015.3	0	18920	NA	0	57629.9	0	0	0	5139.94	0	0	7960.8	3863.7	2413.62
MEX	Mining.and.quarrying	1996	0	0	2251	0	0	0	4940	6686	0	0	0	13877	5022	28082	0	20080	NA	0	67061	0	0	2386.06	0	0	0	5236.4	7087.16	0	0	0	14709.6	5323.32	29205.3	0	20080	NA	0	69318.2	0	0	0	5236.4	0	0	8358.1	4736.61	2661.66
MEX	Mining.and.quarrying	1997	0	0	2116	0	0	0	4644	6285	0	0	0	13045	4943	27830	0	18875	NA	0	64693	0	0	2242.96	0	0	0	4922.64	6662.1	0	0	0	13827.7	5239.58	28943.2	0	18875	NA	0	66885.5	0	0	0	4922.64	0	0	7772.3	4452.53	2619.79
MEX	Mining.and.quarrying	1998	0	0	2276	0	0	0	4996	6761	0	0	0	14033	5489	30928	0	20305	NA	0	70755	0	0	2412.56	0	0	0	5295.76	7166.66	0	0	0	14875	5818.34	32165.1	0	20305	NA	0	73163.4	0	0	0	5295.76	0	0	8271.7	4789.61	2909.17
MEX	Mining.and.quarrying	1999	0	0	4507	0	0	0	4790	5633	0	0	0	14930	5322	32396	0	19655	NA	0	72303	0	0	4777.42	0	0	0	5077.4	5970.98	0	0	0	15825.8	5641.32	33691.8	0	19655	NA	0	74814	0	0	0	5077.4	0	0	7921.43	5374.2	2820.66
MEX	Mining.and.quarrying	2000	0	0	2810	0	0	0	4940	6990	0	0	0	14740	1480	26650	0	20880	NA	0	63750	0	0	2978.6	0	0	0	5236.4	7409.4	0	0	0	15624.4	1568.8	27716	0	20880	NA	0	65789.2	0	0	0	5236.4	0	0	8325.48	5194	784.4
MEX	Mining.and.quarrying	2001	0	0	2680	0	0	0	4710	8330	0	0	0	15720	1370	24750	0	19920	NA	0	61760	0	0	2840.8	0	0	0	4992.6	8829.8	0	0	0	16663.2	1452.2	25740	0	19920	NA	0	63775.4	0	0	0	4992.6	0	0	7942.69	5835.3	726.1
MEX	Mining.and.quarrying	2002	0	0	2620	0	0	0	4510	7300	0	0	0	14430	1320	22980	0	19680	NA	0	58410	0	0	2777.2	0	0	0	4780.6	7738	0	0	0	15295.8	1399.2	23899.2	0	19680	NA	0	60274.2	0	0	0	4780.6	0	0	7846.99	5257.6	699.6
MEX	Mining.and.quarrying	2003	0	0	2310	0	0	0	3980	6460	0	0	0	12750	1320	25480	0	17400	NA	0	56950	0	0	2448.6	0	0	0	4218.8	6847.6	0	0	0	13515	1399.2	26499.2	0	17400	NA	0	58813.4	0	0	0	4218.8	0	0	6937.89	4648.1	699.6
MEX	Mining.and.quarrying	2004	0	0	2530	0	0	0	4360	7070	0	0	0	13960	1310	28290	0	19070	NA	0	62630	0	0	2681.8	0	0	0	4621.6	7494.2	0	0	0	14797.6	1388.6	29421.6	0	19070	NA	0	64677.8	0	0	0	4621.6	0	0	7603.76	5088	694.3
MEX	Mining.and.quarrying	2005	0	0	2560	0	0	0	4410	7150	0	0	0	14120	1330	30180	0	19270	NA	0	64900	0	0	2713.6	0	0	0	4674.6	7579	0	0	0	14967.2	1409.8	31387.2	0	19270	NA	0	67034.2	0	0	0	4674.6	0	0	7683.5	5146.3	704.9
MEX	Mining.and.quarrying	2006	0	0	2950	0	0	0	4440	5530	0	0	0	12920	1360	30590	0	19940	NA	0	64810	0	0	3127	0	0	0	4706.4	5861.8	0	0	0	13695.2	1441.6	31813.6	0	19940	NA	0	66890.4	0	0	0	4706.4	0	0	7950.65	4494.4	720.8
MEX	Mining.and.quarrying	2007	0	0	3560	0	0	0	5030	6270	0	0	0	14860	1360	33300	0	20620	NA	0	70140	0	0	3773.6	0	0	0	5331.8	6646.2	0	0	0	15751.6	1441.6	34632	0	20620	NA	0	72445.2	0	0	0	5331.8	0	0	8221.78	5209.9	720.8
MEX	Mining.and.quarrying	2008	0	0	3690	0	0	0	6200	5960	0	0	0	15850	1380	33880	0	20930	NA	0	72040	0	0	3911.4	0	0	0	6572	6317.6	0	0	0	16801	1462.8	35235.2	0	20930	NA	0	74429	0	0	0	6572	0	0	8345.38	5114.5	731.4
MEX	Mining.and.quarrying	2009	0	0	3010	0	0	0	5670	5950	0	0	0	14630	1170	30180	0	19480	NA	0	65460	0	0	3190.6	0	0	0	6010.2	6307	0	0	0	15507.8	1240.2	31387.2	0	19480	NA	0	67615.2	0	0	0	6010.2	0	0	7767.22	4748.8	620.1
MEX	Food.and.tobacco	1971	0	0	145	0	0	0	0	27137	0	0	0	27282	0	961	50922.2	0	NA	0	79165.2	0	0	153.7	0	0	0	0	28765.2	0	0	0	28918.9	0	999.44	56523.7	0	NA	0	86442	0	0	0	0	0	0	0	0	0
MEX	Food.and.tobacco	1972	0	0	161	0	0	0	0	27264	0	0	0	27425	0	1093	49591.5	0	NA	0	78109.5	0	0	170.66	0	0	0	0	28899.8	0	0	0	29070.5	0	1136.72	55046.5	0	NA	0	85253.8	0	0	0	0	0	0	0	0	0
MEX	Food.and.tobacco	1973	0	0	179	0	0	0	0	26514	0	0	0	26693	0	1230	55472.3	0	NA	0	83395.3	0	0	189.74	0	0	0	0	28104.8	0	0	0	28294.6	0	1279.2	61574.3	0	NA	0	91148.1	0	0	0	0	0	0	0	0	0
MEX	Food.and.tobacco	1974	0	0	174	0	0	0	0	31117	0	0	0	31291	0	1363	57401.9	0	NA	0	90055.9	0	0	184.44	0	0	0	0	32984	0	0	0	33168.5	0	1417.52	63716.2	0	NA	0	98302.1	0	0	0	0	0	0	0	0	0
MEX	Food.and.tobacco	1975	0	0	168	0	0	0	0	30071	0	0	0	30239	0	1367	53934.7	0	NA	0	85540.6	0	0	178.08	0	0	0	0	31875.3	0	0	0	32053.3	0	1421.68	59867.5	0	NA	0	93342.5	0	0	0	0	0	0	0	0	0
MEX	Food.and.tobacco	1976	0	0	150	0	0	0	0	29963	0	0	0	30113	0	1343	51728	0	NA	0	83184	0	0	159	0	0	0	0	31760.8	0	0	0	31919.8	0	1396.72	57418.1	0	NA	0	90734.6	0	0	0	0	0	0	0	0	0
MEX	Food.and.tobacco	1977	0	0	169	0	0	0	0	30338	0	0	0	30507	0	1469	52875.8	0	NA	0	84851.9	0	0	179.14	0	0	0	0	32158.3	0	0	0	32337.4	0	1527.76	58692.2	0	NA	0	92557.4	0	0	0	0	0	0	0	0	0
MEX	Food.and.tobacco	1978	0	0	198	0	0	0	0	33780	0	0	0	33978	0	1549	62699	0	NA	0	98226	0	0	209.88	0	0	0	0	35806.8	0	0	0	36016.7	0	1610.96	69595.8	0	NA	0	107223	0	0	0	0	0	0	0	0	0
MEX	Food.and.tobacco	1979	0	0	237	0	0	0	0	34816	0	0	0	35053	0	1737	66977.1	0	NA	0	103767	0	0	251.22	0	0	0	0	36905	0	0	0	37156.2	0	1806.48	74344.6	0	NA	0	113307	0	0	0	0	0	0	0	0	0
MEX	Food.and.tobacco	1980	0	0	268	0	0	0	0	32475	0	0	0	32743	0	1857	64539.6	0	NA	0	99139.6	0	0	284.08	0	0	0	0	34423.5	0	0	0	34707.6	0	1931.28	71639	0	NA	0	108278	0	0	0	0	0	0	0	0	0
MEX	Food.and.tobacco	1981	0	0	278	0	0	0	0	30425	0	0	0	30703	0	1942	59309.6	0	NA	0	91954.6	0	0	294.68	0	0	0	0	32250.5	0	0	0	32545.2	0	2019.68	65833.6	0	NA	0	100398	0	0	0	0	0	0	0	0	0
MEX	Food.and.tobacco	1982	0	0	290	0	0	0	0	34823	0	0	0	35113	0	2017	63221.8	0	NA	0	100352	0	0	307.4	0	0	0	0	36912.4	0	0	0	37219.8	0	2097.68	70176.3	0	NA	0	109494	0	0	0	0	0	0	0	0	0
MEX	Food.and.tobacco	1983	0	0	277	0	0	0	0	39088	0	0	0	39365	0	2081	65764.4	0	NA	0	107210	0	0	293.62	0	0	0	0	41433.3	0	0	0	41726.9	0	2164.24	72998.5	0	NA	0	116890	0	0	0	0	0	0	0	0	0
MEX	Food.and.tobacco	1984	0	0	271	0	0	0	0	43390	0	0	0	43661	0	2151	72758	0	NA	0	118570	0	0	287.26	0	0	0	0	45993.4	0	0	0	46280.7	0	2237.04	80761.4	0	NA	0	129279	0	0	0	0	0	0	0	0	0
MEX	Food.and.tobacco	1985	0	0	290	0	0	0	0	47840	0	0	0	48130	0	2242	72190.1	0	NA	0	122562	0	0	307.4	0	0	0	0	50710.4	0	0	0	51017.8	0	2331.68	80131.1	0	NA	0	133481	0	0	0	0	0	0	0	0	0
MEX	Food.and.tobacco	1986	0	0	291	0	0	0	0	44967	0	0	0	45258	0	2311	78824.8	0	NA	0	126394	0	0	308.46	0	0	0	0	47665	0	0	0	47973.5	0	2403.44	87495.6	0	NA	0	137872	0	0	0	0	0	0	0	0	0
MEX	Food.and.tobacco	1987	0	0	296	0	0	0	0	44766	0	0	0	45062	0	2362	88830.9	0	NA	0	136255	0	0	313.76	0	0	0	0	47452	0	0	0	47765.7	0	2456.48	98602.3	0	NA	0	148825	0	0	0	0	0	0	0	0	0
MEX	Food.and.tobacco	1988	0	0	326	0	0	0	0	51304	0	0	0	51630	0	2445	78604.9	0	NA	0	132680	0	0	345.56	0	0	0	0	54382.2	0	0	0	54727.8	0	2542.8	87251.5	0	NA	0	144522	0	0	0	0	0	0	0	0	0
MEX	Food.and.tobacco	1989	0	0	374	0	0	0	11448	42213	0	0	0	54035	0	2528	76339.4	2444	NA	0	135346	0	0	396.44	0	0	0	12134.9	44745.8	0	0	0	57277.1	0	2629.12	84736.7	2444	NA	0	147087	0	0	0	12134.9	0	0	1102.15	0	0
MEX	Food.and.tobacco	1990	0	0	731	0	0	0	10222	44703	0	0	0	55656	0	5199	81653.3	2738	NA	0	145246	0	0	774.86	0	0	0	10835.3	47385.2	0	0	0	58995.4	0	5406.96	90635.2	2738	NA	0	157776	0	0	0	10835.3	0	0	1216.49	0	0
MEX	Food.and.tobacco	1991	0	0	875	0	0	0	1993	46815	0	0	0	49683	0	6575	62501	3107	NA	0	121866	0	0	927.5	0	0	0	2112.58	49623.9	0	0	0	52664	0	6838	69376.1	3107	NA	0	131985	0	0	0	2112.58	0	0	1365.41	0	0
MEX	Food.and.tobacco	1992	0	0	1488	0	0	0	4785	45912	0	0	0	52185	0	6222	49735.5	2846	NA	0	110988	0	0	1577.28	0	0	0	5072.1	48666.7	0	0	0	55316.1	0	6470.88	55206.4	2846	NA	0	119839	0	0	0	5072.1	0	0	1237.13	0	0
MEX	Food.and.tobacco	1993	0	0	657	0	0	0	3107	40999	0	0	0	44763	0	6866	55298.4	3885	NA	0	110812	0	0	696.42	0	0	0	3293.42	43458.9	0	0	0	47448.8	0	7140.64	61381.2	3885	NA	0	119856	0	0	0	3293.42	0	0	1670.49	0	0
MEX	Food.and.tobacco	1994	0	0	696	0	0	0	3218	35821	0	0	0	39735	0	7096	41418	4329	NA	0	92578	0	0	737.76	0	0	0	3411.08	37970.3	0	0	0	42119.1	0	7379.84	45974	4329	NA	0	99802	0	0	0	3411.08	0	0	1841.31	0	0
MEX	Food.and.tobacco	1995	0	0	660	0	0	0	2510	39552	0	0	0	42722	0	5986	51229.1	4058	NA	0	103995	0	0	699.6	0	0	0	2660.6	41925.1	0	0	0	45285.3	0	6225.44	56864.3	4058	NA	0	112433	0	0	0	2660.6	0	0	1707.45	0	0
MEX	Food.and.tobacco	1996	0	0	611	0	0	0	2865	43152	0	0	0	46628	0	8579	58831.7	4136	NA	0	118175	0	0	647.66	0	0	0	3036.9	45741.1	0	0	0	49425.7	0	8922.16	65303.2	4136	NA	0	127787	0	0	0	3036.9	0	0	1721.57	0	0
MEX	Food.and.tobacco	1997	0	0	645	0	0	0	3018	42972	0	0	0	46635	0	9508	69761.6	4329	NA	0	130234	0	0	683.7	0	0	0	3199.08	45550.3	0	0	0	49433.1	0	9888.32	77435.4	4329	NA	0	141086	0	0	0	3199.08	0	0	1782.59	0	0
MEX	Food.and.tobacco	1998	0	0	686	0	0	0	3224	48689	0	0	0	52599	0	10778	70253.5	4713	NA	0	138344	0	0	727.16	0	0	0	3417.44	51610.3	0	0	0	55754.9	0	11209.1	77981.4	4713	NA	0	149658	0	0	0	3417.44	0	0	1919.95	0	0
MEX	Food.and.tobacco	1999	0	0	1494	0	0	0	3410	41296	0	0	0	46200	0	12099	63817.7	4980	NA	0	127097	0	0	1583.64	0	0	0	3614.6	43773.8	0	0	0	48972	0	12583	70837.7	4980	NA	0	137373	0	0	0	3614.6	0	0	2007.06	0	0
MEX	Food.and.tobacco	2000	0	0	1190	0	0	0	2740	38010	0	0	0	41940	0	8910	54558.5	4570	NA	0	109979	0	0	1261.4	0	0	0	2904.4	40290.6	0	0	0	44456.4	0	9266.4	60560	4570	NA	0	118853	0	0	0	2904.4	0	0	1822.19	0	0
MEX	Food.and.tobacco	2001	0	0	1290	0	0	0	2650	37970	0	0	0	41910	0	9170	44306.5	4570	NA	0	99956.5	0	0	1367.4	0	0	0	2809	40248.2	0	0	0	44424.6	0	9536.8	49180.2	4570	NA	0	107712	0	0	0	2809	0	0	1822.19	0	0
MEX	Food.and.tobacco	2002	0	0	1140	0	0	0	2600	33730	0	0	0	37470	0	9420	41409	5720	NA	0	94019	0	0	1208.4	0	0	0	2756	35753.8	0	0	0	39718.2	0	9796.8	45964	5720	NA	0	101199	0	0	0	2756	0	0	2280.73	0	0
MEX	Food.and.tobacco	2003	0	0	1200	0	0	0	2720	31660	0	0	0	35580	0	9650	41831.9	5950	NA	0	93011.9	0	0	1272	0	0	0	2883.2	33559.6	0	0	0	37714.8	0	10036	46433.5	5950	NA	0	100134	0	0	0	2883.2	0	0	2372.44	0	0
MEX	Food.and.tobacco	2004	0	0	1220	0	0	0	2750	28770	0	0	0	32740	0	9940	42916.8	6120	NA	0	91716.8	0	0	1293.2	0	0	0	2915	30496.2	0	0	0	34704.4	0	10337.6	47637.6	6120	NA	0	98799.6	0	0	0	2915	0	0	2440.22	0	0
MEX	Food.and.tobacco	2005	0	0	1290	0	0	0	2830	26160	0	0	0	30280	0	10590	55858.3	6220	NA	0	102948	0	0	1367.4	0	0	0	2999.8	27729.6	0	0	0	32096.8	0	11013.6	62002.7	6220	NA	0	111333	0	0	0	2999.8	0	0	2480.09	0	0
MEX	Food.and.tobacco	2006	0	0	1610	0	0	0	3730	21280	0	0	0	26620	0	11360	51955	6530	NA	0	96465	0	0	1706.6	0	0	0	3953.8	22556.8	0	0	0	28217.2	0	11814.4	57670.1	6530	NA	0	104232	0	0	0	3953.8	0	0	2603.7	0	0
MEX	Food.and.tobacco	2007	0	0	1820	0	0	0	3940	22020	0	0	0	27780	0	11670	45759.2	6770	NA	0	91979.2	0	0	1929.2	0	0	0	4176.4	23341.2	0	0	0	29446.8	0	12136.8	50792.7	6770	NA	0	99146.3	0	0	0	4176.4	0	0	2699.39	0	0
MEX	Food.and.tobacco	2008	0	0	1880	0	0	0	4160	18170	0	0	0	24210	0	11840	52934.8	6810	NA	0	95794.8	0	0	1992.8	0	0	0	4409.6	19260.2	0	0	0	25662.6	0	12313.6	58757.7	6810	NA	0	103544	0	0	0	4409.6	0	0	2715.34	0	0
MEX	Food.and.tobacco	2009	0	0	1900	0	0	0	3740	14520	0	0	0	20160	0	10840	39684.4	6520	NA	0	77204.4	0	0	2014	0	0	0	3964.4	15391.2	0	0	0	21369.6	0	11273.6	44049.7	6520	NA	0	83212.9	0	0	0	3964.4	0	0	2599.71	0	0
MEX	Paper.pulp.and.printing	1971	0	0	0	0	0	0	101	8078	0	0	0	8179	0	6132	0	1690	NA	0	16001	0	0	0	0	0	0	107.06	8562.68	0	0	0	8669.74	0	6377.28	0	1690	NA	0	16737	0	0	0	107.06	0	0	817.408	0	0
MEX	Paper.pulp.and.printing	1972	0	0	0	0	0	0	109	8730	0	0	0	8839	0	6627	0	1827	NA	0	17293	0	0	0	0	0	0	115.54	9253.8	0	0	0	9369.34	0	6892.08	0	1827	NA	0	18088.4	0	0	0	115.54	0	0	888.289	0	0
MEX	Paper.pulp.and.printing	1973	0	0	0	0	0	0	124	8309	0	0	0	8433	0	7515	0	2112	NA	0	18060	0	0	0	0	0	0	131.44	8807.54	0	0	0	8938.98	0	7815.6	0	2112	NA	0	18866.6	0	0	0	131.44	0	0	1032.2	0	0
MEX	Paper.pulp.and.printing	1974	0	0	0	0	0	0	139	11155	0	0	0	11294	0	8468	0	2575	NA	0	22337	0	0	0	0	0	0	147.34	11824.3	0	0	0	11971.6	0	8806.72	0	2575	NA	0	23353.4	0	0	0	147.34	0	0	1265.02	0	0
MEX	Paper.pulp.and.printing	1975	0	0	0	0	0	0	132	10540	0	0	0	10672	0	8001	0	2443	NA	0	21116	0	0	0	0	0	0	139.92	11172.4	0	0	0	11312.3	0	8321.04	0	2443	NA	0	22076.4	0	0	0	139.92	0	0	1206.38	0	0
MEX	Paper.pulp.and.printing	1976	0	0	0	0	0	0	148	11842	0	0	0	11990	0	8990	0	2758	NA	0	23738	0	0	0	0	0	0	156.88	12552.5	0	0	0	12709.4	0	9349.6	0	2758	NA	0	24817	0	0	0	156.88	0	0	1368.95	0	0
MEX	Paper.pulp.and.printing	1977	0	0	0	0	0	0	162	12934	0	0	0	13096	0	9819	0	3107	NA	0	26022	0	0	0	0	0	0	171.72	13710	0	0	0	13881.8	0	10211.8	0	3107	NA	0	27200.5	0	0	0	171.72	0	0	1550.1	0	0
MEX	Paper.pulp.and.printing	1978	0	0	0	0	0	0	176	14086	0	0	0	14262	0	10693	0	3306	NA	0	28261	0	0	0	0	0	0	186.56	14931.2	0	0	0	15117.7	0	11120.7	0	3306	NA	0	29544.4	0	0	0	186.56	0	0	1657.83	0	0
MEX	Paper.pulp.and.printing	1979	0	0	0	0	0	0	192	15406	0	0	0	15598	0	11695	0	3622	NA	0	30915	0	0	0	0	0	0	203.52	16330.4	0	0	0	16533.9	0	12162.8	0	3622	NA	0	32318.7	0	0	0	203.52	0	0	1825.55	0	0
MEX	Paper.pulp.and.printing	1980	0	0	0	0	0	0	211	16874	0	0	0	17085	0	12809	0	3963	NA	0	33857	0	0	0	0	0	0	223.66	17886.4	0	0	0	18110.1	0	13321.4	0	3963	NA	0	35394.5	0	0	0	223.66	0	0	2007.58	0	0
MEX	Paper.pulp.and.printing	1981	0	0	0	0	0	0	217	17353	0	0	0	17570	0	13173	0	4083	NA	0	34826	0	0	0	0	0	0	230.02	18394.2	0	0	0	18624.2	0	13699.9	0	4083	NA	0	36407.1	0	0	0	230.02	0	0	2044.63	0	0
MEX	Paper.pulp.and.printing	1982	0	0	0	0	0	0	221	17675	0	0	0	17896	0	13418	0	4159	NA	0	35473	0	0	0	0	0	0	234.26	18735.5	0	0	0	18969.8	0	13954.7	0	4159	NA	0	37083.5	0	0	0	234.26	0	0	2058.15	0	0
MEX	Paper.pulp.and.printing	1983	0	0	0	0	0	0	229	18345	0	0	0	18574	0	13926	0	4317	NA	0	36817	0	0	0	0	0	0	242.74	19445.7	0	0	0	19688.4	0	14483	0	4317	NA	0	38488.5	0	0	0	242.74	0	0	2110.47	0	0
MEX	Paper.pulp.and.printing	1984	0	0	0	0	0	0	249	19928	0	0	0	20177	0	15128	0	4695	NA	0	40000	0	0	0	0	0	0	263.94	21123.7	0	0	0	21387.6	0	15733.1	0	4695	NA	0	41815.7	0	0	0	263.94	0	0	2266.72	0	0
MEX	Paper.pulp.and.printing	1985	0	0	0	0	0	0	272	21780	0	0	0	22052	0	16534	0	5175	NA	0	43761	0	0	0	0	0	0	288.32	23086.8	0	0	0	23375.1	0	17195.4	0	5175	NA	0	45745.5	0	0	0	288.32	0	0	2466.51	0	0
MEX	Paper.pulp.and.printing	1986	0	0	0	0	0	0	274	21979	0	0	0	22253	0	16685	0	4537	NA	0	43475	0	0	0	0	0	0	290.44	23297.7	0	0	0	23588.2	0	17352.4	0	4537	NA	0	45477.6	0	0	0	290.44	0	0	2133.99	0	0
MEX	Paper.pulp.and.printing	1987	0	0	0	0	0	0	282	22795	0	0	0	23077	0	17303	0	5286	NA	0	45666	0	0	0	0	0	0	298.92	24162.7	0	0	0	24461.6	0	17995.1	0	5286	NA	0	47742.7	0	0	0	298.92	0	0	2452.64	0	0
MEX	Paper.pulp.and.printing	1988	0	0	0	0	0	0	282	22795	0	0	0	23077	0	17303	0	5589	NA	0	45969	0	0	0	0	0	0	298.92	24162.7	0	0	0	24461.6	0	17995.1	0	5589	NA	0	48045.7	0	0	0	298.92	0	0	2557.11	0	0
MEX	Paper.pulp.and.printing	1989	0	0	0	0	0	0	374	26402	0	0	0	26776	0	19583	0	8610	NA	0	54969	0	0	0	0	0	0	396.44	27986.1	0	0	0	28382.6	0	20366.3	0	8610	NA	0	57358.9	0	0	0	396.44	0	0	3882.78	0	0
MEX	Paper.pulp.and.printing	1990	0	0	247	0	0	0	517	31080	0	0	0	31844	0	14266	0	9269	NA	0	55379	0	0	261.82	0	0	0	548.02	32944.8	0	0	0	33754.6	0	14836.6	0	9269	NA	0	57860.3	0	0	0	548.02	0	0	4118.19	0	0
MEX	Paper.pulp.and.printing	1991	0	0	171	0	0	0	994	18630	0	0	0	19795	0	24248	0	7966	NA	0	52009	0	0	181.26	0	0	0	1053.64	19747.8	0	0	0	20982.7	0	25217.9	0	7966	NA	0	54166.6	0	0	0	1053.64	0	0	3500.75	0	0
MEX	Paper.pulp.and.printing	1992	0	0	231	0	0	0	4160	14915	0	0	0	19306	0	19432	0	9820	NA	0	48558	0	0	244.86	0	0	0	4409.6	15809.9	0	0	0	20464.4	0	20209.3	0	9820	NA	0	50493.6	0	0	0	4409.6	0	0	4268.67	0	0
MEX	Paper.pulp.and.printing	1993	0	0	227	0	0	0	4069	14589	0	0	0	18885	0	17034	0	9607	NA	0	45526	0	0	240.62	0	0	0	4313.14	15464.3	0	0	0	20018.1	0	17715.4	0	9607	NA	0	47340.5	0	0	0	4313.14	0	0	4130.87	0	0
MEX	Paper.pulp.and.printing	1994	0	0	235	0	0	0	4212	15098	0	0	0	19545	0	16496	0	9942	NA	0	45983	0	0	249.1	0	0	0	4464.72	16003.9	0	0	0	20717.7	0	17155.8	0	9942	NA	0	47815.5	0	0	0	4464.72	0	0	4228.76	0	0
MEX	Paper.pulp.and.printing	1995	0	0	216	0	0	0	3901	9396	0	0	0	13513	0	14333	0	9215	NA	0	37061	0	0	228.96	0	0	0	4135.06	9959.76	0	0	0	14323.8	0	14906.3	0	9215	NA	0	38445.1	0	0	0	4135.06	0	0	3877.32	0	0
MEX	Paper.pulp.and.printing	1996	0	0	227	0	0	0	4121	13945	0	0	0	18293	0	18821	0	9734	NA	0	46848	0	0	240.62	0	0	0	4368.26	14781.7	0	0	0	19390.6	0	19573.8	0	9734	NA	0	48698.4	0	0	0	4368.26	0	0	4051.68	0	0
MEX	Paper.pulp.and.printing	1997	0	0	204	0	0	0	3705	12538	0	0	0	16447	0	17841	0	8752	NA	0	43040	0	0	216.24	0	0	0	3927.3	13290.3	0	0	0	17433.8	0	18554.6	0	8752	NA	0	44740.5	0	0	0	3927.3	0	0	3603.88	0	0
MEX	Paper.pulp.and.printing	1998	0	0	229	0	0	0	4167	14101	0	0	0	18497	0	19793	0	9400	NA	0	47690	0	0	242.74	0	0	0	4417.02	14947.1	0	0	0	19606.8	0	20584.7	0	9400	NA	0	49591.5	0	0	0	4417.02	0	0	3829.3	0	0
MEX	Paper.pulp.and.printing	1999	0	0	497	0	0	0	4384	12891	0	0	0	17772	0	22745	0	9983	NA	0	50500	0	0	526.82	0	0	0	4647.04	13664.5	0	0	0	18838.3	0	23654.8	0	9983	NA	0	52476.1	0	0	0	4647.04	0	0	4023.39	0	0
MEX	Paper.pulp.and.printing	2000	0	0	1130	0	0	0	1090	14970	0	0	0	17190	0	24470	209.97	8800	NA	0	50670	0	0	1197.8	0	0	0	1155.4	15868.2	0	0	0	18221.4	0	25448.8	233.067	8800	NA	0	52703.3	0	0	0	1155.4	0	0	3508.82	0	0
MEX	Paper.pulp.and.printing	2001	0	0	290	0	0	0	880	14770	0	0	0	15940	0	23250	219.97	9030	NA	0	48440	0	0	307.4	0	0	0	932.8	15656.2	0	0	0	16896.4	0	24180	244.167	9030	NA	0	50350.6	0	0	0	932.8	0	0	3600.53	0	0
MEX	Paper.pulp.and.printing	2002	0	0	280	0	0	0	840	12940	0	0	0	14060	0	23880	209.97	8910	NA	0	47060	0	0	296.8	0	0	0	890.4	13716.4	0	0	0	14903.6	0	24835.2	233.067	8910	NA	0	48881.9	0	0	0	890.4	0	0	3552.68	0	0
MEX	Paper.pulp.and.printing	2003	0	0	280	0	0	0	830	12830	0	0	0	13940	0	24680	209.97	8840	NA	0	47670	0	0	296.8	0	0	0	879.8	13599.8	0	0	0	14776.4	0	25667.2	233.067	8840	NA	0	49516.7	0	0	0	879.8	0	0	3524.77	0	0
MEX	Paper.pulp.and.printing	2004	0	0	300	0	0	0	880	13570	0	0	0	14750	0	25940	219.97	9350	NA	0	50260	0	0	318	0	0	0	932.8	14384.2	0	0	0	15635	0	26977.6	244.167	9350	NA	0	52206.8	0	0	0	932.8	0	0	3728.12	0	0
MEX	Paper.pulp.and.printing	2005	0	0	310	0	0	0	910	14010	0	0	0	15230	0	26750	239.95	9660	NA	0	51879.9	0	0	328.6	0	0	0	964.6	14850.6	0	0	0	16143.8	0	27820	266.345	9660	NA	0	53890.1	0	0	0	964.6	0	0	3851.72	0	0
MEX	Paper.pulp.and.printing	2006	0	0	380	0	0	0	1220	10840	0	0	0	12440	0	27130	229.94	10050	NA	0	49849.9	0	0	402.8	0	0	0	1293.2	11490.4	0	0	0	13186.4	0	28215.2	255.233	10050	NA	0	51706.8	0	0	0	1293.2	0	0	4007.22	0	0
MEX	Paper.pulp.and.printing	2007	0	0	450	0	0	0	1340	11950	0	0	0	13740	0	28720	239.95	10170	NA	0	52869.9	0	0	477	0	0	0	1420.4	12667	0	0	0	14564.4	0	29868.8	266.345	10170	NA	0	54869.5	0	0	0	1420.4	0	0	4055.07	0	0
MEX	Paper.pulp.and.printing	2008	0	0	480	0	0	0	1480	10900	0	0	0	12860	0	27980	239.95	10440	NA	0	51519.9	0	0	508.8	0	0	0	1568.8	11554	0	0	0	13631.6	0	29099.2	266.345	10440	NA	0	53437.1	0	0	0	1568.8	0	0	4162.72	0	0
MEX	Paper.pulp.and.printing	2009	0	0	470	0	0	0	1310	10880	0	0	0	12660	0	28980	0	10230	NA	0	51870	0	0	498.2	0	0	0	1388.6	11532.8	0	0	0	13419.6	0	30139.2	0	10230	NA	0	53788.8	0	0	0	1388.6	0	0	4078.99	0	0
MEX	Construction	1971	0	0	0	0	0	0	1081	0	0	0	0	1081	0	0	0	286	NA	0	1367	0	0	0	0	0	0	1145.86	0	0	0	0	1145.86	0	0	0	286	NA	0	1431.86	0	0	0	1145.86	0	0	138.331	0	0
MEX	Construction	1972	0	0	0	0	0	0	1323	0	0	0	0	1323	0	0	0	350	NA	0	1673	0	0	0	0	0	0	1402.38	0	0	0	0	1402.38	0	0	0	350	NA	0	1752.38	0	0	0	1402.38	0	0	170.17	0	0
MEX	Construction	1973	0	0	0	0	0	0	1564	0	0	0	0	1564	0	0	0	421	NA	0	1985	0	0	0	0	0	0	1657.84	0	0	0	0	1657.84	0	0	0	421	NA	0	2078.84	0	0	0	1657.84	0	0	205.757	0	0
MEX	Construction	1974	0	0	0	0	0	0	1805	0	0	0	0	1805	0	0	0	527	NA	0	2332	0	0	0	0	0	0	1913.3	0	0	0	0	1913.3	0	0	0	527	NA	0	2440.3	0	0	0	1913.3	0	0	258.899	0	0
MEX	Construction	1975	0	0	0	0	0	0	2046	0	0	0	0	2046	0	0	0	599	NA	0	2645	0	0	0	0	0	0	2168.76	0	0	0	0	2168.76	0	0	0	599	NA	0	2767.76	0	0	0	2168.76	0	0	295.793	0	0
MEX	Construction	1976	0	0	0	0	0	0	2287	0	0	0	0	2287	0	0	0	673	NA	0	2960	0	0	0	0	0	0	2424.22	0	0	0	0	2424.22	0	0	0	673	NA	0	3097.22	0	0	0	2424.22	0	0	334.048	0	0
MEX	Construction	1977	0	0	0	0	0	0	2528	0	0	0	0	2528	0	0	0	768	NA	0	3296	0	0	0	0	0	0	2679.68	0	0	0	0	2679.68	0	0	0	768	NA	0	3447.68	0	0	0	2679.68	0	0	383.16	0	0
MEX	Construction	1978	0	0	0	0	0	0	2769	0	0	0	0	2769	0	0	0	821	NA	0	3590	0	0	0	0	0	0	2935.14	0	0	0	0	2935.14	0	0	0	821	NA	0	3756.14	0	0	0	2935.14	0	0	411.698	0	0
MEX	Construction	1979	0	0	0	0	0	0	3011	0	0	0	0	3011	0	0	0	895	NA	0	3906	0	0	0	0	0	0	3191.66	0	0	0	0	3191.66	0	0	0	895	NA	0	4086.66	0	0	0	3191.66	0	0	451.096	0	0
MEX	Construction	1980	0	0	0	0	0	0	3252	0	0	0	0	3252	0	0	0	965	NA	0	4217	0	0	0	0	0	0	3447.12	0	0	0	0	3447.12	0	0	0	965	NA	0	4412.12	0	0	0	3447.12	0	0	488.851	0	0
MEX	Construction	1981	0	0	0	0	0	0	3720	0	0	0	0	3720	0	0	0	1106	NA	0	4826	0	0	0	0	0	0	3943.2	0	0	0	0	3943.2	0	0	0	1106	NA	0	5049.2	0	0	0	3943.2	0	0	553.848	0	0
MEX	Construction	1982	0	0	0	0	0	0	3458	0	0	0	0	3458	0	0	0	1028	NA	0	4486	0	0	0	0	0	0	3665.48	0	0	0	0	3665.48	0	0	0	1028	NA	0	4693.48	0	0	0	3665.48	0	0	508.722	0	0
MEX	Construction	1983	0	0	0	0	0	0	2817	0	0	0	0	2817	0	0	0	838	NA	0	3655	0	0	0	0	0	0	2986.02	0	0	0	0	2986.02	0	0	0	838	NA	0	3824.02	0	0	0	2986.02	0	0	409.677	0	0
MEX	Construction	1984	0	0	0	0	0	0	2944	0	0	0	0	2944	0	0	0	876	NA	0	3820	0	0	0	0	0	0	3120.64	0	0	0	0	3120.64	0	0	0	876	NA	0	3996.64	0	0	0	3120.64	0	0	422.927	0	0
MEX	Construction	1985	0	0	0	0	0	0	3024	0	0	0	0	3024	0	0	0	908	NA	0	3932	0	0	0	0	0	0	3205.44	0	0	0	0	3205.44	0	0	0	908	NA	0	4113.44	0	0	0	3205.44	0	0	432.771	0	0
MEX	Construction	1986	0	0	0	0	0	0	2712	0	0	0	0	2712	0	0	0	707	NA	0	3419	0	0	0	0	0	0	2874.72	0	0	0	0	2874.72	0	0	0	707	NA	0	3581.72	0	0	0	2874.72	0	0	332.539	0	0
MEX	Construction	1987	0	0	0	0	0	0	2765	0	0	0	0	2765	0	0	0	811	NA	0	3576	0	0	0	0	0	0	2930.9	0	0	0	0	2930.9	0	0	0	811	NA	0	3741.9	0	0	0	2930.9	0	0	376.294	0	0
MEX	Construction	1988	0	0	0	0	0	0	2776	0	0	0	0	2776	0	0	0	861	NA	0	3637	0	0	0	0	0	0	2942.56	0	0	0	0	2942.56	0	0	0	861	NA	0	3803.56	0	0	0	2942.56	0	0	393.929	0	0
MEX	Construction	1989	0	0	0	0	0	0	4395	0	0	0	0	4395	0	0	0	988	NA	0	5383	0	0	0	0	0	0	4658.7	0	0	0	0	4658.7	0	0	0	988	NA	0	5646.7	0	0	0	4658.7	0	0	445.55	0	0
MEX	Construction	1990	0	0	0	0	0	0	4693	0	0	0	0	4693	0	0	0	1063	NA	0	5756	0	0	0	0	0	0	4974.58	0	0	0	0	4974.58	0	0	0	1063	NA	0	6037.58	0	0	0	4974.58	0	0	472.288	0	0
MEX	Construction	1991	0	0	0	0	0	0	4813	0	0	0	0	4813	0	0	0	1097	NA	0	5910	0	0	0	0	0	0	5101.78	0	0	0	0	5101.78	0	0	0	1097	NA	0	6198.78	0	0	0	5101.78	0	0	482.089	0	0
MEX	Construction	1992	0	0	0	0	0	0	5167	0	0	0	0	5167	0	0	0	1185	NA	0	6352	0	0	0	0	0	0	5477.02	0	0	0	0	5477.02	0	0	0	1185	NA	0	6662.02	0	0	0	5477.02	0	0	515.109	0	0
MEX	Construction	1993	0	0	0	0	0	0	5258	0	0	0	0	5258	0	0	0	1227	NA	0	6485	0	0	0	0	0	0	5573.48	0	0	0	0	5573.48	0	0	0	1227	NA	0	6800.48	0	0	0	5573.48	0	0	527.592	0	0
MEX	Construction	1994	0	0	0	0	0	0	5254	0	0	0	0	5254	0	0	0	1524	NA	0	6778	0	0	0	0	0	0	5569.24	0	0	0	0	5569.24	0	0	0	1524	NA	0	7093.24	0	0	0	5569.24	0	0	648.222	0	0
MEX	Construction	1995	0	0	0	0	0	0	4017	0	0	0	0	4017	0	0	0	1168	NA	0	5185	0	0	0	0	0	0	4258.02	0	0	0	0	4258.02	0	0	0	1168	NA	0	5426.02	0	0	0	4258.02	0	0	491.449	0	0
MEX	Construction	1996	0	0	0	0	0	0	4833	0	0	0	0	4833	0	0	0	1407	NA	0	6240	0	0	0	0	0	0	5122.98	0	0	0	0	5122.98	0	0	0	1407	NA	0	6529.98	0	0	0	5122.98	0	0	585.65	0	0
MEX	Construction	1997	0	0	0	0	0	0	4907	0	0	0	0	4907	0	0	0	1429	NA	0	6336	0	0	0	0	0	0	5201.42	0	0	0	0	5201.42	0	0	0	1429	NA	0	6630.42	0	0	0	5201.42	0	0	588.43	0	0
MEX	Construction	1998	0	0	0	0	0	0	5133	0	0	0	0	5133	0	0	0	1495	NA	0	6628	0	0	0	0	0	0	5440.98	0	0	0	0	5440.98	0	0	0	1495	NA	0	6935.98	0	0	0	5440.98	0	0	609.022	0	0
MEX	Construction	1999	0	0	0	0	0	0	5601	0	0	0	0	5601	0	0	0	1614	NA	0	7215	0	0	0	0	0	0	5937.06	0	0	0	0	5937.06	0	0	0	1614	NA	0	7551.06	0	0	0	5937.06	0	0	650.48	0	0
MEX	Construction	2000	0	0	0	0	0	0	6310	0	0	0	0	6310	0	0	0	1420	NA	0	7730	0	0	0	0	0	0	6688.6	0	0	0	0	6688.6	0	0	0	1420	NA	0	8108.6	0	0	0	6688.6	0	0	566.196	0	0
MEX	Construction	2001	0	0	0	0	0	0	6020	0	0	0	0	6020	0	0	0	1360	NA	0	7380	0	0	0	0	0	0	6381.2	0	0	0	0	6381.2	0	0	0	1360	NA	0	7741.2	0	0	0	6381.2	0	0	542.272	0	0
MEX	Construction	2002	0	0	0	0	0	0	5930	0	0	0	0	5930	0	0	0	1380	NA	0	7310	0	0	0	0	0	0	6285.8	0	0	0	0	6285.8	0	0	0	1380	NA	0	7665.8	0	0	0	6285.8	0	0	550.246	0	0
MEX	Construction	2003	0	0	0	0	0	0	6130	0	0	0	0	6130	0	0	0	1430	NA	0	7560	0	0	0	0	0	0	6497.8	0	0	0	0	6497.8	0	0	0	1430	NA	0	7927.8	0	0	0	6497.8	0	0	570.183	0	0
MEX	Construction	2004	0	0	0	0	0	0	6460	0	0	0	0	6460	0	0	0	1500	NA	0	7960	0	0	0	0	0	0	6847.6	0	0	0	0	6847.6	0	0	0	1500	NA	0	8347.6	0	0	0	6847.6	0	0	598.093	0	0
MEX	Construction	2005	0	0	0	0	0	0	6670	0	0	0	0	6670	0	0	0	1550	NA	0	8220	0	0	0	0	0	0	7070.2	0	0	0	0	7070.2	0	0	0	1550	NA	0	8620.2	0	0	0	7070.2	0	0	618.029	0	0
MEX	Construction	2006	0	0	0	0	0	0	9180	0	0	0	0	9180	0	0	0	1660	NA	0	10840	0	0	0	0	0	0	9730.8	0	0	0	0	9730.8	0	0	0	1660	NA	0	11390.8	0	0	0	9730.8	0	0	661.889	0	0
MEX	Construction	2007	0	0	0	0	0	0	9980	0	0	0	0	9980	0	0	0	1720	NA	0	11700	0	0	0	0	0	0	10578.8	0	0	0	0	10578.8	0	0	0	1720	NA	0	12298.8	0	0	0	10578.8	0	0	685.813	0	0
MEX	Construction	2008	0	0	0	0	0	0	10470	0	0	0	0	10470	0	0	0	1700	NA	0	12170	0	0	0	0	0	0	11098.2	0	0	0	0	11098.2	0	0	0	1700	NA	0	12798.2	0	0	0	11098.2	0	0	677.838	0	0
MEX	Construction	2009	0	0	0	0	0	0	10360	0	0	0	0	10360	0	0	0	1640	NA	0	12000	0	0	0	0	0	0	10981.6	0	0	0	0	10981.6	0	0	0	1640	NA	0	12621.6	0	0	0	10981.6	0	0	653.914	0	0
MEX	Textile.and.leather	1971	0	0	8	0	0	0	15	199	0	0	0	222	0	1260	0	318	NA	0	1800	0	0	8.48	0	0	0	15.9	210.94	0	0	0	235.32	0	1310.4	0	318	NA	0	1863.72	0	0	0	0	0	0	153.808	0	0
MEX	Textile.and.leather	1972	0	0	9	0	0	0	18	233	0	0	0	260	0	1472	0	372	NA	0	2104	0	0	9.54	0	0	0	19.08	246.98	0	0	0	275.6	0	1530.88	0	372	NA	0	2178.48	0	0	0	0	0	0	180.867	0	0
MEX	Textile.and.leather	1973	0	0	9	0	0	0	18	241	0	0	0	268	0	1525	0	393	NA	0	2186	0	0	9.54	0	0	0	19.08	255.46	0	0	0	284.08	0	1586	0	393	NA	0	2263.08	0	0	0	0	0	0	192.072	0	0
MEX	Textile.and.leather	1974	0	0	10	0	0	0	20	264	0	0	0	294	0	1670	0	465	NA	0	2429	0	0	10.6	0	0	0	21.2	279.84	0	0	0	311.64	0	1736.8	0	465	NA	0	2513.44	0	0	0	0	0	0	228.44	0	0
MEX	Textile.and.leather	1975	0	0	11	0	0	0	22	293	0	0	0	326	0	1850	0	518	NA	0	2694	0	0	11.66	0	0	0	23.32	310.58	0	0	0	345.56	0	1924	0	518	NA	0	2787.56	0	0	0	0	0	0	255.794	0	0
MEX	Textile.and.leather	1976	0	0	14	0	0	0	27	360	0	0	0	401	0	2278	0	640	NA	0	3319	0	0	14.84	0	0	0	28.62	381.6	0	0	0	425.06	0	2369.12	0	640	NA	0	3434.18	0	0	0	0	0	0	317.668	0	0
MEX	Textile.and.leather	1977	0	0	12	0	0	0	23	303	0	0	0	338	0	1919	0	557	NA	0	2814	0	0	12.72	0	0	0	24.38	321.18	0	0	0	358.28	0	1995.76	0	557	NA	0	2911.04	0	0	0	0	0	0	277.89	0	0
MEX	Textile.and.leather	1978	0	0	14	0	0	0	28	363	0	0	0	405	0	2297	0	651	NA	0	3353	0	0	14.84	0	0	0	29.68	384.78	0	0	0	429.3	0	2388.88	0	651	NA	0	3469.18	0	0	0	0	0	0	326.45	0	0
MEX	Textile.and.leather	1979	0	0	13	0	0	0	26	346	0	0	0	385	0	2186	0	620	NA	0	3191	0	0	13.78	0	0	0	27.56	366.76	0	0	0	408.1	0	2273.44	0	620	NA	0	3301.54	0	0	0	0	0	0	312.491	0	0
MEX	Textile.and.leather	1980	0	0	12	0	0	0	23	304	0	0	0	339	0	1922	0	545	NA	0	2806	0	0	12.72	0	0	0	24.38	322.24	0	0	0	359.34	0	1998.88	0	545	NA	0	2903.22	0	0	0	0	0	0	276.087	0	0
MEX	Textile.and.leather	1981	0	0	13	0	0	0	25	334	0	0	0	372	0	2110	0	599	NA	0	3081	0	0	13.78	0	0	0	26.5	354.04	0	0	0	394.32	0	2194.4	0	599	NA	0	3187.72	0	0	0	0	0	0	299.959	0	0
MEX	Textile.and.leather	1982	0	0	14	0	0	0	28	366	0	0	0	408	0	2317	0	658	NA	0	3383	0	0	14.84	0	0	0	29.68	387.96	0	0	0	432.48	0	2409.68	0	658	NA	0	3500.16	0	0	0	0	0	0	325.622	0	0
MEX	Textile.and.leather	1983	0	0	15	0	0	0	31	402	0	0	0	448	0	2543	0	722	NA	0	3713	0	0	15.9	0	0	0	32.86	426.12	0	0	0	474.88	0	2644.72	0	722	NA	0	3841.6	0	0	0	0	0	0	352.968	0	0
MEX	Textile.and.leather	1984	0	0	17	0	0	0	34	441	0	0	0	492	0	2791	0	794	NA	0	4077	0	0	18.02	0	0	0	36.04	467.46	0	0	0	521.52	0	2902.64	0	794	NA	0	4218.16	0	0	0	0	0	0	383.338	0	0
MEX	Textile.and.leather	1985	0	0	18	0	0	0	37	484	0	0	0	539	0	3064	0	879	NA	0	4482	0	0	19.08	0	0	0	39.22	513.04	0	0	0	571.34	0	3186.56	0	879	NA	0	4636.9	0	0	0	0	0	0	418.949	0	0
MEX	Textile.and.leather	1986	0	0	16	0	0	0	32	418	0	0	0	466	0	2641	0	658	NA	0	3765	0	0	16.96	0	0	0	33.92	443.08	0	0	0	493.96	0	2746.64	0	658	NA	0	3898.6	0	0	0	0	0	0	309.492	0	0
MEX	Textile.and.leather	1987	0	0	12	0	0	0	278	398	0	0	0	688	0	2291	0	721	NA	0	3700	0	0	12.72	0	0	0	294.68	421.88	0	0	0	729.28	0	2382.64	0	721	NA	0	3832.92	0	0	0	0	0	0	334.535	0	0
MEX	Textile.and.leather	1988	0	0	12	0	0	0	314	553	0	0	0	879	0	2596	0	960	NA	0	4435	0	0	12.72	0	0	0	332.84	586.18	0	0	0	931.74	0	2699.84	0	960	NA	0	4591.58	0	0	0	0	0	0	439.224	0	0
MEX	Textile.and.leather	1989	0	0	28	0	0	0	386	589	0	0	0	1003	0	3086	0	1013	NA	0	5102	0	0	29.68	0	0	0	409.16	624.34	0	0	0	1063.18	0	3209.44	0	1013	NA	0	5285.62	0	0	0	0	0	0	456.825	0	0
MEX	Textile.and.leather	1990	0	0	4	0	0	0	239	700	0	0	0	943	0	3150	0	1009	NA	0	5102	0	0	4.24	0	0	0	253.34	742	0	0	0	999.58	0	3276	0	1009	NA	0	5284.58	0	0	0	0	0	0	448.296	0	0
MEX	Textile.and.leather	1991	0	0	4	0	0	0	553	569	0	0	0	1126	0	3177	0	1030	NA	0	5333	0	0	4.24	0	0	0	586.18	603.14	0	0	0	1193.56	0	3304.08	0	1030	NA	0	5527.64	0	0	0	0	0	0	452.645	0	0
MEX	Textile.and.leather	1992	0	0	4	0	0	0	493	589	0	0	0	1086	0	3143	0	992	NA	0	5221	0	0	4.24	0	0	0	522.58	624.34	0	0	0	1151.16	0	3268.72	0	992	NA	0	5411.88	0	0	0	0	0	0	431.214	0	0
MEX	Textile.and.leather	1993	0	0	4	0	0	0	656	533	0	0	0	1193	0	1743	0	925	NA	0	3861	0	0	4.24	0	0	0	695.36	564.98	0	0	0	1264.58	0	1812.72	0	925	NA	0	4002.3	0	0	0	0	0	0	397.737	0	0
MEX	Textile.and.leather	1994	0	0	4	0	0	0	776	509	0	0	0	1289	0	1942	0	1009	NA	0	4240	0	0	4.24	0	0	0	822.56	539.54	0	0	0	1366.34	0	2019.68	0	1009	NA	0	4395.02	0	0	0	0	0	0	429.171	0	0
MEX	Textile.and.leather	1995	0	0	4	0	0	0	733	356	0	0	0	1093	0	1720	0	953	NA	0	3766	0	0	4.24	0	0	0	776.98	377.36	0	0	0	1158.58	0	1788.8	0	953	NA	0	3900.38	0	0	0	0	0	0	400.986	0	0
MEX	Textile.and.leather	1996	0	0	4	0	0	0	837	518	0	0	0	1359	0	2444	0	1089	NA	0	4892	0	0	4.24	0	0	0	887.22	549.08	0	0	0	1440.54	0	2541.76	0	1089	NA	0	5071.3	0	0	0	0	0	0	453.285	0	0
MEX	Textile.and.leather	1997	0	0	5	0	0	0	946	586	0	0	0	1537	0	2912	0	1231	NA	0	5680	0	0	5.3	0	0	0	1002.76	621.16	0	0	0	1629.22	0	3028.48	0	1231	NA	0	5888.7	0	0	0	0	0	0	506.898	0	0
MEX	Textile.and.leather	1998	0	0	5	0	0	0	1019	631	0	0	0	1655	0	3227	0	1326	NA	0	6208	0	0	5.3	0	0	0	1080.14	668.86	0	0	0	1754.3	0	3356.08	0	1326	NA	0	6436.38	0	0	0	0	0	0	540.176	0	0
MEX	Textile.and.leather	1999	0	0	10	0	0	0	1001	539	0	0	0	1550	0	2908	0	1315	NA	0	5773	0	0	10.6	0	0	0	1061.06	571.34	0	0	0	1643	0	3024.32	0	1315	NA	0	5982.32	0	0	0	0	0	0	529.976	0	0
MEX	Textile.and.leather	2000	0	0	10	0	0	0	1020	610	0	0	0	1640	0	5960	0	1280	NA	0	8880	0	0	10.6	0	0	0	1081.2	646.6	0	0	0	1738.4	0	6198.4	0	1280	NA	0	9216.8	0	0	0	0	0	0	510.374	0	0
MEX	Textile.and.leather	2001	0	0	10	0	0	0	1040	650	0	0	0	1700	0	5730	0	1220	NA	0	8650	0	0	10.6	0	0	0	1102.4	689	0	0	0	1802	0	5959.2	0	1220	NA	0	8981.2	0	0	0	0	0	0	486.45	0	0
MEX	Textile.and.leather	2002	0	0	10	0	0	0	940	530	0	0	0	1480	0	5120	0	1260	NA	0	7860	0	0	10.6	0	0	0	996.4	561.8	0	0	0	1568.8	0	5324.8	0	1260	NA	0	8153.6	0	0	0	0	0	0	502.399	0	0
MEX	Textile.and.leather	2003	0	0	10	0	0	0	1020	580	0	0	0	1610	0	3920	0	1330	NA	0	6860	0	0	10.6	0	0	0	1081.2	614.8	0	0	0	1706.6	0	4076.8	0	1330	NA	0	7113.4	0	0	0	0	0	0	530.31	0	0
MEX	Textile.and.leather	2004	0	0	20	0	0	0	1170	660	0	0	0	1850	0	4100	0	1480	NA	0	7430	0	0	21.2	0	0	0	1240.2	699.6	0	0	0	1961	0	4264	0	1480	NA	0	7705	0	0	0	0	0	0	590.119	0	0
MEX	Textile.and.leather	2005	0	0	20	0	0	0	1230	700	0	0	0	1950	0	4490	0	1670	NA	0	8110	0	0	21.2	0	0	0	1303.8	742	0	0	0	2067	0	4669.6	0	1670	NA	0	8406.6	0	0	0	0	0	0	665.877	0	0
MEX	Textile.and.leather	2006	0	0	20	0	0	0	1540	540	0	0	0	2100	0	4200	0	1510	NA	0	7810	0	0	21.2	0	0	0	1632.4	572.4	0	0	0	2226	0	4368	0	1510	NA	0	8104	0	0	0	0	0	0	602.08	0	0
MEX	Textile.and.leather	2007	0	0	20	0	0	0	1650	580	0	0	0	2250	0	4290	0	1400	NA	0	7940	0	0	21.2	0	0	0	1749	614.8	0	0	0	2385	0	4461.6	0	1400	NA	0	8246.6	0	0	0	0	0	0	558.22	0	0
MEX	Textile.and.leather	2008	0	0	20	0	0	0	1700	580	0	0	0	2300	0	4200	0	1190	NA	0	7690	0	0	21.2	0	0	0	1802	614.8	0	0	0	2438	0	4368	0	1190	NA	0	7996	0	0	0	0	0	0	474.486	0	0
MEX	Textile.and.leather	2009	0	0	20	0	0	0	1550	530	0	0	0	2100	0	3820	0	1360	NA	0	7280	0	0	21.2	0	0	0	1643	561.8	0	0	0	2226	0	3972.8	0	1360	NA	0	7558.8	0	0	0	0	0	0	542.27	0	0
MEX	Non.specified.indust	1971	0	0	2612	0	0	6317	0	1616	0	0	0	10545	0	92506	0	13653	NA	0	116704	0	0	2768.72	0	0	6696.02	0	1712.96	0	0	0	11177.7	0	96206.2	0	13653	NA	0	121037	0	0	0	0	0	0	6603.59	5588.85	0
MEX	Non.specified.indust	1972	0	0	2811	0	0	6493	0	9637	0	0	0	18941	0	90066	0	15423	NA	0	124430	0	0	2979.66	0	0	6882.58	0	10215.2	0	0	0	20077.5	0	93668.6	0	15423	NA	0	129169	0	0	0	0	0	0	7498.68	10038.7	0
MEX	Non.specified.indust	1973	0	0	3056	0	0	6421	0	1885	0	0	0	11362	0	101582	0	17192	NA	0	130136	0	0	3239.36	0	0	6806.26	0	1998.1	0	0	0	12043.7	0	105645	0	17192	NA	0	134881	0	0	0	0	0	0	8402.3	6021.86	0
MEX	Non.specified.indust	1974	0	0	2732	0	0	6846	0	18026	0	0	0	27604	0	92792	0	17231	NA	0	137627	0	0	2895.92	0	0	7256.76	0	19107.6	0	0	0	29260.2	0	96503.7	0	17231	NA	0	142995	0	0	0	0	0	0	8465.07	14630.1	0
MEX	Non.specified.indust	1975	0	0	3750	0	0	7391	0	47841	0	0	0	58982	0	78875	0	20117	NA	0	157974	0	0	3975	0	0	7834.46	0	50711.5	0	0	0	62520.9	0	82030	0	20117	NA	0	164668	0	0	0	0	0	0	9933.99	31260.5	0
MEX	Non.specified.indust	1976	0	0	4048	0	0	7553	0	77487	0	0	0	89088	0	70224	0	25798	NA	0	185110	0	0	4290.88	0	0	8006.18	0	82136.2	0	0	0	94433.3	0	73033	0	25798	NA	0	193264	0	0	0	0	0	0	12805	47216.6	0
MEX	Non.specified.indust	1977	0	0	3975	0	0	8010	0	43920	0	0	0	55905	0	72123	0	29458	NA	0	157486	0	0	4213.5	0	0	8490.6	0	46555.2	0	0	0	59259.3	0	75007.9	0	29458	NA	0	163725	0	0	0	0	0	0	14696.8	29629.7	0
MEX	Non.specified.indust	1978	0	0	4216	0	0	8129	0	58036	0	0	0	70381	0	86165	0	34866	NA	0	191412	0	0	4468.96	0	0	8616.74	0	61518.2	0	0	0	74603.9	0	89611.6	0	34866	NA	0	199081	0	0	0	0	0	0	17483.9	37301.9	0
MEX	Non.specified.indust	1979	0	0	4324	0	0	8129	0	35842	0	0	0	48295	0	121615	0	39931	NA	0	209841	0	0	4583.44	0	0	8616.74	0	37992.5	0	0	0	51192.7	0	126480	0	39931	NA	0	217603	0	0	0	0	0	0	20126	25596.4	0
MEX	Non.specified.indust	1980	0	0	5913	0	0	7587	0	12005	0	0	0	25505	0	132985	0	41522	NA	0	200012	0	0	6267.78	0	0	8042.22	0	12725.3	0	0	0	27035.3	0	138304	0	41522	NA	0	206862	0	0	0	0	0	0	21034.3	13517.7	0
MEX	Non.specified.indust	1981	0	0	5941	0	0	8431	0	24062	0	0	0	38434	0	153750	0	47813	NA	0	239997	0	0	6297.46	0	0	8936.86	0	25505.7	0	0	0	40740	0	159900	0	47813	NA	0	248453	0	0	0	0	0	0	23943.2	20370	0
MEX	Non.specified.indust	1982	0	0	8113	0	0	6943	0	6079	0	0	0	21135	0	164779	0	55209	NA	0	241123	0	0	8599.78	0	0	7359.58	0	6443.74	0	0	0	22403.1	0	171370	0	55209	NA	0	248982	0	0	0	0	0	0	27321	11201.6	0
MEX	Non.specified.indust	1983	0	0	11521	0	0	5247	0	9978	0	0	0	26746	0	199771	0	61438	NA	0	287955	0	0	12212.3	0	0	5561.82	0	10576.7	0	0	0	28350.8	0	207762	0	61438	NA	0	297551	0	0	0	0	0	0	30035.5	14175.4	0
MEX	Non.specified.indust	1984	0	0	11612	0	0	4026	0	1677	0	0	0	17315	0	138254	0	66115	NA	0	221684	0	0	12308.7	0	0	4267.56	0	1777.62	0	0	0	18353.9	0	143784	0	66115	NA	0	228253	0	0	0	0	0	0	31919.9	9176.95	0
MEX	Non.specified.indust	1985	0	0	11951	0	0	3527	0	27465	0	0	0	42943	0	143996	0	72378	NA	0	259317	0	0	12668.1	0	0	3738.62	0	29112.9	0	0	0	45519.6	0	149756	0	72378	NA	0	267653	0	0	0	0	0	0	34496.8	22759.8	0
MEX	Non.specified.indust	1986	0	0	11796	0	0	4474	0	19701	0	0	0	35971	0	54029	0	86384	NA	0	176384	0	0	12503.8	0	0	4742.44	0	20883.1	0	0	0	38129.3	0	56190.2	0	86384	NA	0	180703	0	0	0	0	0	0	40630.9	19064.6	0
MEX	Non.specified.indust	1987	0	0	11128	0	0	3213	14889	38006	0	0	0	67236	0	78473	0	87880	NA	0	233589	0	0	11795.7	0	0	3405.78	15782.3	40286.4	0	0	0	71270.2	0	81611.9	0	87880	NA	0	240762	0	0	0	15782.3	0	0	40775.2	27743.9	0
MEX	Non.specified.indust	1988	0	0	10378	0	0	2673	21208	7963	0	0	0	42222	0	31145	0	79239	NA	0	152606	0	0	11000.7	0	0	2833.38	22480.5	8440.78	0	0	0	44755.3	0	32390.8	0	79239	NA	0	156385	0	0	0	22480.5	0	0	36253.8	11137.4	0
MEX	Non.specified.indust	1989	0	0	8225	0	0	3114	13271	28921	0	0	0	53531	0	70906	0	81629	NA	0	206066	0	0	8718.5	0	0	3300.84	14067.3	30656.3	0	0	0	56742.9	0	73742.2	0	81629	NA	0	212114	0	0	0	14067.3	0	0	36811.6	21337.8	0
MEX	Non.specified.indust	1990	0	0	10929	0	0	2446	17045	27178	0	0	0	57598	0	88595	0	88992	NA	34	235219	0	0	11584.7	0	0	2592.76	18067.7	28808.7	0	0	0	61053.9	0	92138.8	0	88992	NA	34	242219	0	0	0	18067.7	0	0	39538.9	21493.1	0
MEX	Non.specified.indust	1991	0	0	11729	0	0	1941	29274	12157	0	0	0	55101	0	90624	0	100600	NA	36.01	246361	0	0	12432.7	0	0	2057.46	31030.4	12886.4	0	0	0	58407.1	0	94249	0	100600	NA	36.01	253292	0	0	0	31030.4	0	0	44209.8	13688.3	0
MEX	Non.specified.indust	1992	0	0	12715	0	0	2072	44569	10556	0	0	0	69912	0	88600	0	100523	NA	38.98	259074	0	0	13477.9	0	0	2196.32	47243.1	11189.4	0	0	0	74106.7	0	92144	0	100523	NA	38.98	266813	0	0	0	47243.1	0	0	43696.5	13431.8	0
MEX	Non.specified.indust	1993	0	0	13585	0	0	1038	44061	9971	0	0	0	68655	0	100103	0	108203	NA	44	277005	0	0	14400.1	0	0	1100.28	46704.7	10569.3	0	0	0	72774.3	0	104107	0	108203	NA	44	285128	0	0	0	46704.7	0	0	46525.7	13034.8	0
MEX	Non.specified.indust	1994	0	0	14047	0	0	1071	37891	23198	0	0	0	76207	0	90465	0	117694	NA	48.99	284415	0	0	14889.8	0	0	1135.26	40164.5	24589.9	0	0	0	80779.4	0	94083.6	0	117694	NA	48.99	292606	0	0	0	40164.5	0	0	50060.3	20307.5	0
MEX	Non.specified.indust	1995	0	0	12069	0	0	1026	41448	4213	0	0	0	58756	0	121239	0	128520	NA	48.99	308564	0	0	12793.1	0	0	1087.56	43934.9	4465.78	0	0	0	62281.4	0	126089	0	128520	NA	48.99	316939	0	0	0	43934.9	0	0	54076.2	9173.24	0
MEX	Non.specified.indust	1996	0	0	12174	0	0	1218	43660	18652	0	0	0	75704	0	100213	0	149800	NA	54.97	325772	0	0	12904.4	0	0	1291.08	46279.6	19771.1	0	0	0	80246.2	0	104222	0	149800	NA	54.97	334323	0	0	0	46279.6	0	0	62352.8	16983.3	0
MEX	Non.specified.indust	1997	0	0	11973	0	0	1205	49818	19157	0	0	0	82153	0	63743	0	173555	NA	58.99	319510	0	0	12691.4	0	0	1277.3	52807.1	20306.4	0	0	0	87082.2	0	66292.7	0	173555	NA	58.99	326989	0	0	0	52807.1	0	0	71466.1	17137.6	0
MEX	Non.specified.indust	1998	0	0	12525	0	0	124	54555	5809	0	0	0	73013	0	74960	0	182505	NA	65.98	330544	0	0	13276.5	0	0	131.44	57828.3	6157.54	0	0	0	77393.8	0	77958.4	0	182505	NA	65.98	337923	0	0	0	57828.3	0	0	74347.5	9782.74	0
MEX	Non.specified.indust	1999	0	0	25842	0	0	519	25500	4717	0	0	0	56578	0	32993	0	195224	NA	73.98	284869	0	0	27392.5	0	0	550.14	27030	5000.02	0	0	0	59972.7	0	34312.7	0	195224	NA	73.98	289583	0	0	0	27030	0	0	78679.9	16471.3	0
MEX	Non.specified.indust	2000	0	0	34070	0	0	1540	26570	65160	0	0	0	127340	0	105860	2910.45	223180	NA	84.99	459375	0	0	36114.2	0	0	1632.4	28164.2	69069.6	0	0	0	134980	0	110094	3230.6	223180	NA	84.99	471570	0	0	0	28164.2	0	0	88988.5	53408.1	0
MEX	Non.specified.indust	2001	0	0	31820	0	0	2160	25230	73190	0	0	0	132400	0	62980	3757.28	230900	NA	101.99	430139	0	0	33729.2	0	0	2289.6	26743.8	77581.4	0	0	0	140344	0	65499.2	4170.58	230900	NA	101.99	441016	0	0	0	26743.8	0	0	92066.7	56800.1	0
MEX	Non.specified.indust	2002	0	0	33690	0	0	1700	24930	48700	0	0	0	109020	0	127300	1619.71	243010	NA	112	481062	0	0	35711.4	0	0	1802	26425.8	51622	0	0	0	115561	0	132392	1797.88	243010	NA	112	492873	0	0	0	26425.8	0	0	96895.2	44567.7	0
MEX	Non.specified.indust	2003	0	0	32600	0	0	60	27420	63290	0	0	0	123370	0	151670	3272.36	236150	NA	129.96	514592	0	0	34556	0	0	63.6	29065.2	67087.4	0	0	0	130772	0	157737	3632.32	236150	NA	129.96	528421	0	0	0	29065.2	0	0	94159.9	50853.5	0
MEX	Non.specified.indust	2004	0	0	33410	0	0	110	35280	67790	0	0	0	136590	0	169080	3754.26	235170	NA	144.99	544739	0	0	35414.6	0	0	116.6	37396.8	71857.4	0	0	0	144785	0	175843	4167.23	235170	NA	144.99	560111	0	0	0	37396.8	0	0	93769.1	53694.3	0
MEX	Non.specified.indust	2005	0	0	32790	0	0	30	29620	62010	0	0	0	124450	0	163440	1989.61	243360	NA	163.96	533404	0	0	34757.4	0	0	31.8	31397.2	65730.6	0	0	0	131917	0	169978	2208.47	243360	NA	163.96	547627	0	0	0	31397.2	0	0	97034.6	50259.9	0
MEX	Non.specified.indust	2006	0	0	33900	0	0	40	23130	47420	0	0	0	104490	0	204440	4638.1	251020	NA	183.97	564772	0	0	35934	0	0	42.4	24517.8	50265.2	0	0	0	110759	0	212618	5148.29	251020	NA	183.97	579729	0	0	0	24517.8	0	0	100089	43120.8	0
MEX	Non.specified.indust	2007	0	0	35910	0	0	20	24440	43440	0	0	0	103810	0	206290	7442.58	263260	NA	211.98	581015	0	0	38064.6	0	0	21.2	25906.4	46046.4	0	0	0	110039	0	214542	8261.26	263260	NA	211.98	596313	0	0	0	25906.4	0	0	104969	42066.1	0
MEX	Non.specified.indust	2008	0	0	34620	0	0	0	27490	31620	0	0	0	93730	0	187250	3789.26	267100	NA	260.96	552130	0	0	36697.2	0	0	0	29139.4	33517.2	0	0	0	99353.8	0	194740	4206.08	267100	NA	260.96	565661	0	0	0	29139.4	0	0	106500	35107.2	0
MEX	Non.specified.indust	2009	0	0	34440	0	0	0	22110	26050	0	0	0	82600	0	180690	3332.36	257850	NA	313.93	524786	0	0	36506.4	0	0	0	23436.6	27613	0	0	0	87556	0	187918	3698.92	257850	NA	313.93	537336	0	0	0	23436.6	0	0	102812	32059.7	0
MEX	Energy.Industry	1971	0	9545.9	15449.3	10173.9	0	8080.52	31735.9	27172.3	0	1590.98	9629.64	113379	2386.48	45950	0	3654	NA	0	165369	0	10118.7	16376.2	10784.4	0	8565.36	33640.1	28802.7	0	1686.44	10207.4	120181	2529.66	47788	0	3654	NA	0	174153	0	10784.4	0	33640.1	0	47788	1767.34	0	1065.12
MEX	Energy.Industry	1972	0	9587.77	22776.2	15072.5	0	4228.67	17459	75069.3	0	1339.78	7201.3	152734	3181.97	61576	0	4338	NA	0	221830	0	10163	24142.8	15976.8	0	4482.39	18506.5	79573.5	0	1420.16	7633.37	161899	3372.89	64039	0	4338	NA	0	233648	0	15976.8	0	18506.5	0	64039	2109.14	0	1642.06
MEX	Energy.Industry	1973	0	9713.38	28260.9	16077.3	0	8373.6	39104.7	81391.4	0	2512.08	10676.3	196110	3181.97	75584	0	4471.2	NA	0	279347	0	10296.2	29956.6	17042	0	8876.02	41451	86274.9	0	2662.8	11316.9	207876	3372.89	78607.4	0	4471.2	NA	0	294328	0	17042	0	41451	0	78607.4	2185.22	0	1153.88
MEX	Energy.Industry	1974	0	12309.2	27046.7	12016.1	0	8499.2	42998.4	67616.8	0	1800.32	12476.7	184763	3433.18	99508	0	5324.4	NA	0	293029	0	13047.7	28669.5	12737.1	0	9009.16	45578.3	71673.8	0	1908.34	13225.3	195849	3639.17	103488	0	5324.4	NA	0	308301	0	12737.1	0	45578.3	0	103488	2615.72	0	1420.16
MEX	Energy.Industry	1975	0	7494.37	7075.69	12016.1	0	4270.54	17375.2	60038.7	0	1758.46	7703.71	117733	4061.2	62497	0	5864.4	NA	0	190155	0	7944.03	7500.23	12737.1	0	4526.77	18417.7	63641	0	1863.96	8165.93	124797	4304.87	64996.9	0	5864.4	NA	0	199963	0	12737.1	0	18417.7	0	64996.9	2895.9	0	1863.96
MEX	Energy.Industry	1976	0	8792.28	4019.33	25581.3	0	6070.86	27967.8	44547.6	0	2009.66	10467	129456	5987.12	58874	0	6872.4	NA	0	201189	0	9319.82	4260.49	27116.2	0	6435.11	29645.9	47220.4	0	2130.24	11095	137223	6346.35	61229	0	6872.4	NA	0	211671	0	27116.2	0	29645.9	0	61229	3411.16	0	1375.78
MEX	Energy.Industry	1977	0	12560.4	4814.82	9922.72	0	10215.8	30396.2	114300	0	586.152	9504.04	192300	6363.94	72696	0	7372.8	NA	0	278732	0	13314	5103.71	10518.1	0	10828.7	32219.9	121158	0	621.321	10074.3	203838	6745.77	75603.8	0	7372.8	NA	0	293560	0	10518.1	0	32219.9	0	75603.8	3678.33	0	1464.54
MEX	Energy.Industry	1978	0	12644.1	3977.46	11723	0	7829.32	27256.1	86248.1	0	0	11471.8	161150	5233.5	98938	0	8510.4	NA	0	273832	0	13402.8	4216.11	12426.4	0	8299.07	28891.4	91423	0	0	12160.1	170819	5547.51	102896	0	8510.4	NA	0	287772	0	12426.4	0	28891.4	0	102896	4267.62	0	1642.06
MEX	Energy.Industry	1979	0	14151.4	7913.05	17124	0	10969.4	29600.7	66109.6	0	1465.38	8541.07	155875	1842.19	143808	0	9201.6	NA	0	310726	0	15000.5	8387.84	18151.5	0	11627.6	31376.7	70076.1	0	1553.3	9053.54	165227	1952.72	149560	0	9201.6	NA	0	325942	0	18151.5	0	31376.7	0	149560	4637.77	0	1863.96
MEX	Energy.Industry	1980	0	18045.1	11471.8	17752	0	7829.32	57317.3	94872.9	0	1088.57	11178.8	219556	1758.46	160908	0	10638	NA	0	392860	0	19127.8	12160.1	18817.2	0	8299.07	60756.3	100565	0	1153.88	11849.5	232729	1863.96	167344	0	10638	NA	0	412575	0	18817.2	0	60756.3	0	167344	5389.01	0	1775.2
MEX	Energy.Industry	1981	0	18380.1	21729.5	16537.9	0	8750.41	61880.9	111704	0	1214.17	12058	252255	2470.21	149933	0	8085.6	NA	0	412744	0	19482.9	23033.3	17530.1	0	9275.44	65593.8	118406	0	1287.02	12781.5	267390	2618.42	155930	0	8085.6	NA	0	434024	0	17530.1	0	65593.8	0	155930	4049	0	1863.96
MEX	Energy.Industry	1982	0	19175.5	25288.3	14402.6	0	18840.6	54763.3	116100	0	2302.74	7243.16	258116	3056.36	196277	0	6310.8	NA	0	463760	0	20326.1	26805.6	15266.7	0	19971	58049.1	123066	0	2440.9	7677.75	273603	3239.75	204128	0	6310.8	NA	0	487282	0	15266.7	0	58049.1	0	204128	3123	0	3239.75
MEX	Energy.Industry	1983	0	21687.6	21897	25874.4	0	17793.9	25120.8	89178.8	0	2219	8331.73	212103	7703.71	174392	0	13892.4	NA	0	408091	0	22988.9	23210.8	27426.9	0	18861.5	26628	94529.6	0	2352.14	8831.64	224829	8165.93	181368	0	13892.4	NA	0	428256	0	27426.9	0	26628	0	181368	6791.65	0	7367.09
MEX	Energy.Industry	1984	0	14151.4	4228.67	4898.56	0	17626.4	37555.6	106680	0	962.964	11723	197826	1423.51	285263	0	14400	NA	0	498913	0	15000.5	4482.39	5192.47	0	18684	39808.9	113080	0	1020.74	12426.4	209696	1508.92	296674	0	14400	NA	0	522278	0	5192.47	0	39808.9	0	296674	6952.23	0	355.041
MEX	Energy.Industry	1985	0	18966.2	1172.3	28219	0	19426.8	61462.2	83484.8	0	962.964	1925.93	215620	4689.22	310974	0	15188.4	NA	0	546472	0	20104.2	1242.64	29912.2	0	20592.4	65150	88493.9	0	1020.74	2041.48	228557	4970.57	323413	0	15188.4	NA	0	572129	0	29912.2	0	65150	0	323413	7239.1	0	4082.97
MEX	Energy.Industry	1986	0	21268.9	16119.2	31275.4	0	17040.3	70798.8	109359	0	0	11304.4	277166	3475.04	261152	0	17344.8	NA	0	559138	0	22545.1	17086.3	33151.9	0	18062.7	75046.7	115921	0	0	11982.6	293796	3683.55	271598	0	17344.8	NA	0	586423	0	33151.9	0	75046.7	0	271598	8158.16	0	2662.8
MEX	Energy.Industry	1987	0	21729.5	21729.5	26460.6	0	16705.3	68286.7	96631.3	0	125.604	8248	259917	167.472	217496	0	19213.2	NA	0	496793	0	23033.3	23033.3	28048.2	0	17707.7	72383.9	102429	0	133.14	8742.88	275512	177.52	226196	0	19213.2	NA	0	521098	0	28048.2	0	72383.9	0	226196	8914.68	0	177.52
MEX	Energy.Industry	1988	0	26921.1	22734.3	11597.4	0	15574.9	39649	116728	0	41.868	4019.33	237266	209.34	257857	0	19994.4	NA	0	515327	0	28536.4	24098.4	12293.3	0	16509.4	42027.9	123732	0	44.3801	4260.49	251502	221.9	268171	0	19994.4	NA	0	539889	0	12293.3	0	42027.9	0	268171	9147.93	0	221.9
MEX	Energy.Industry	1989	0	30145	31401	10173.9	0	17668.3	47603.9	118696	0	879.228	4312.4	260880	251.208	245911	0	21016.8	NA	0	528059	0	31953.7	33285.1	10784.4	0	18728.4	50460.2	125818	0	931.982	4571.15	276532	266.28	255747	0	21016.8	NA	0	553563	0	10784.4	0	50460.2	0	255747	9477.78	0	266.28
MEX	Energy.Industry	1990	376.812	34666.7	24074.1	69668.4	0	14946.9	41909.9	27172.3	0	1088.57	0	213904	2386.48	257317	0	20973.6	NA	0	494581	399.421	36746.7	25518.5	73848.5	0	15843.7	44424.5	28802.7	0	1153.88	0	226738	2529.66	267610	0	20973.6	NA	0	517851	0	73848.5	0	44424.5	0	267610	9318.51	0	2529.66
MEX	Energy.Industry	1991	125.604	47729.5	26963	91314.1	0	6405.8	63681.2	110992	0	2888.89	0	350100	2302.74	232070	0	35038.8	NA	0	619512	133.14	50593.3	28580.8	96793	0	6790.15	67502.1	117652	0	3062.23	0	371106	2440.9	241353	0	35038.8	NA	0	649939	0	96793	0	67502.1	0	241353	15398.2	0	2440.9
MEX	Energy.Industry	1992	41.868	45259.3	28972.7	65439.7	0	10383.3	57777.8	116142	0	2512.08	0	326529	1549.12	273523	0	35881.2	NA	0	637482	44.3801	47974.9	30711	69366.1	0	11006.3	61244.5	123110	0	2662.8	0	346120	1642.06	284464	0	35881.2	NA	0	668107	0	69366.1	0	61244.5	0	284464	15597.2	0	1642.06
MEX	Energy.Industry	1993	0	46054.8	29684.4	48943.7	0	16370.4	12727.9	121794	2512.08	0	0	278087	1423.51	315148	0	36720	NA	0	631379	0	48818.1	31465.5	51880.3	0	17352.6	13491.5	129102	2662.8	0	0	294772	1508.92	327754	0	36720	NA	0	660755	0	51880.3	0	13491.5	0	269868	15789.1	0	1508.92
MEX	Energy.Industry	1994	334.944	57024.2	30103.1	24744	0	12686	41198.1	119408	2512.08	0	0	288010	1549.12	320221	0	39952.8	NA	0	649733	355.041	60445.7	31909.3	26228.6	0	13447.2	43670	126572	2662.8	0	0	305291	1642.06	333030	0	39952.8	NA	0	679915	0	26228.6	0	43670	0	272485	16993.6	0	1642.06
MEX	Energy.Industry	1995	1172.3	54386.5	27800.4	24409	0	6950.09	36885.7	122715	2177.14	0	0	276496	1716.59	295981	0	37148.4	NA	0	611342	1242.64	57649.7	29468.4	25873.6	0	7367.09	39098.9	130078	2307.76	0	0	293086	1819.58	307820	0	37148.4	NA	0	639874	0	25873.6	0	39098.9	0	248244	15630.6	0	1819.58
MEX	Energy.Industry	1996	0	42872.8	24074.1	22357.5	0	4563.61	38309.2	122129	3809.99	0	0	258116	1632.85	321279	0	38538	NA	0	619566	0	45445.2	25518.5	23699	0	4837.43	40607.8	129457	4038.59	0	0	273603	1730.82	334130	0	38538	NA	0	648002	0	23699	0	40607.8	0	270400	16041.1	0	1730.82
MEX	Energy.Industry	1997	0	61964.6	15909.8	7033.82	0	418.68	40946.9	113546	6280.2	0	0	246100	1716.59	309796	0	49906.8	NA	0	607519	0	65682.5	16864.4	7455.85	0	443.801	43403.7	120359	6657.01	0	0	260866	1819.58	322188	0	49906.8	NA	0	634780	0	7455.85	0	43403.7	0	245208	20550.5	0	1819.58
MEX	Energy.Industry	1998	0	61462.2	14444.5	44338.2	0	3181.97	49822.9	105591	5317.24	0	0	284158	1758.46	337182	0	46638	NA	0	669737	0	65150	15311.1	46998.5	0	3372.89	52812.3	111927	5636.27	0	0	301208	1863.96	350669	0	46638	NA	0	700379	0	46998.5	0	52812.3	0	268166	18999	0	1863.96
MEX	Energy.Industry	1999	0	93030.7	8122.39	44924.4	0	125.604	23571.7	97719.9	4061.2	0	0	271556	1590.98	344246	0	47800.8	NA	0	665194	0	98612.5	8609.74	47619.8	0	133.14	24986	103583	4304.87	0	0	287849	1686.44	358016	0	47800.8	NA	0	695352	0	47619.8	0	24986	0	273983	19264.9	0	1686.44
MEX	Energy.Industry	2000	0	90141.8	9294.7	35294.7	0	0	22901.8	91942.1	6363.94	0	0	255939	1842.19	370031	0	52005.6	NA	0	679818	0	95550.3	9852.38	37412.4	0	0	24275.9	97458.7	6745.77	0	0	271295	1952.72	384832	0	52005.6	NA	0	710086	0	37412.4	0	24275.9	0	297447	20736.2	0	1952.72
MEX	Energy.Industry	2001	0	83777.9	10048.3	32950.1	0	0	25790.7	84866.4	4019.33	0	0	241453	1590.98	407517	0	58888.8	NA	0	709450	0	88804.5	10651.2	34927.1	0	0	27338.1	89958.4	4260.49	0	0	255940	1686.44	423818	0	58888.8	NA	0	740333	0	34927.1	0	27338.1	0	325827	23480.7	0	1686.44
MEX	Energy.Industry	2002	0	79549.2	5359.1	30396.2	0	0	24283.4	91104.8	5400.97	0	0	236094	1716.59	407732	0	59565.6	NA	0	705108	0	84322.2	5680.65	32219.9	0	0	25740.4	96571.1	5725.03	0	0	250259	1819.58	424041	0	59565.6	NA	0	735686	0	32219.9	0	25740.4	0	322643	23750.6	0	1819.58
MEX	Energy.Industry	2003	0	110406	6740.75	15198.1	0	0	25874.4	99604	6112.73	0	0	263936	1381.64	418198	0	59418	NA	0	742934	0	117030	7145.19	16110	0	0	27426.9	105580	6479.49	0	0	279772	1464.54	434926	0	59418	NA	0	775580	0	16110	0	27426.9	0	321722	23691.7	0	1464.54
MEX	Energy.Industry	2004	0	107475	8289.86	16244.8	0	0	33368.8	102953	5861.52	0	0	274194	1758.46	437766	0	67946.4	NA	0	781664	0	113924	8787.26	17219.5	0	0	35370.9	109131	6213.21	0	0	290645	1863.96	455277	0	67946.4	NA	0	815732	0	17219.5	0	35370.9	0	347911	27092.2	0	1863.96
MEX	Energy.Industry	2005	0	120831	7954.92	15784.2	0	0	34457.4	94579.8	5777.78	0	0	279385	1632.85	481614	0	69634.8	NA	0	832267	0	128081	8432.22	16731.3	0	0	36524.8	100255	6124.45	0	0	296148	1730.82	500879	0	69634.8	NA	0	868392	0	16731.3	0	36524.8	0	387619	27765.4	0	1730.82
MEX	Energy.Industry	2006	0	122003	7745.58	15700.5	0	0	31401	87755.3	9127.22	0	0	273733	1674.72	514458	0	64062	NA	0	853928	0	129324	8210.31	16642.5	0	0	33285.1	93020.6	9674.86	0	0	290157	1775.2	535036	0	64062	NA	0	891030	0	16642.5	0	33285.1	0	418267	25543.3	0	1775.2
MEX	Energy.Industry	2007	0	118780	7243.16	15826.1	0	0	36006.5	87043.6	5442.84	0	0	270342	1674.72	567362	0	65221.2	NA	0	904600	0	125906	7677.75	16775.7	0	0	38166.9	92266.2	5769.41	0	0	286562	1775.2	590056	0	65221.2	NA	0	943615	0	16775.7	0	38166.9	0	473451	26005.5	0	1775.2
MEX	Energy.Industry	2008	0	118486	6698.88	15616.8	0	0	36969.4	85075.8	4647.35	0	0	267495	1758.46	604956	0	64105.2	NA	0	938314	0	125596	7100.81	16553.8	0	0	39187.6	90180.3	4926.19	0	0	283544	1863.96	629154	0	64105.2	NA	0	978668	0	16553.8	0	39187.6	0	503532	25560.5	0	1863.96
MEX	Energy.Industry	2009	0	118110	6615.14	16412.3	0	0	41784.3	78042	3809.99	0	0	264773	4438.01	611504	0	66060	NA	0	946775	0	125196	7012.05	17397	0	0	44291.3	82724.5	4038.59	0	0	280660	4704.29	635964	0	66060	NA	0	987388	0	17397	0	44291.3	0	514701	26340	0	4704.29
MEX	Coal.mines	1971	0	0	0	0	0	0	0	0	0	0	0	0	1381.64	0	0	0	NA	0	1381.64	0	0	0	0	0	0	0	0	0	0	0	0	1464.54	0	0	0	NA	0	1464.54	0	0	0	0	0	0	0	0	0
MEX	Coal.mines	1972	0	0	0	0	0	0	0	0	0	0	0	0	1632.85	0	0	0	NA	0	1632.85	0	0	0	0	0	0	0	0	0	0	0	0	1730.82	0	0	0	NA	0	1730.82	0	0	0	0	0	0	0	0	0
MEX	Coal.mines	1973	0	0	0	0	0	0	0	0	0	0	0	0	2093.4	0	0	0	NA	0	2093.4	0	0	0	0	0	0	0	0	0	0	0	0	2219	0	0	0	NA	0	2219	0	0	0	0	0	0	0	0	0
MEX	Coal.mines	1974	0	0	0	0	0	0	0	0	0	0	0	0	2093.4	0	0	0	NA	0	2093.4	0	0	0	0	0	0	0	0	0	0	0	0	2219	0	0	0	NA	0	2219	0	0	0	0	0	0	0	0	0
MEX	Coal.mines	1975	0	0	0	0	0	0	0	0	0	0	0	0	2302.74	0	0	0	NA	0	2302.74	0	0	0	0	0	0	0	0	0	0	0	0	2440.9	0	0	0	NA	0	2440.9	0	0	0	0	0	0	0	0	0
MEX	Coal.mines	1976	0	0	0	0	0	0	0	0	0	0	0	0	4689.22	0	0	0	NA	0	4689.22	0	0	0	0	0	0	0	0	0	0	0	0	4970.57	0	0	0	NA	0	4970.57	0	0	0	0	0	0	0	0	0
MEX	Coal.mines	1977	0	0	0	0	0	0	0	0	0	0	0	0	4982.29	0	0	0	NA	0	4982.29	0	0	0	0	0	0	0	0	0	0	0	0	5281.23	0	0	0	NA	0	5281.23	0	0	0	0	0	0	0	0	0
MEX	Coal.mines	1978	0	0	0	0	0	0	0	0	0	0	0	0	3684.38	0	0	0	NA	0	3684.38	0	0	0	0	0	0	0	0	0	0	0	0	3905.45	0	0	0	NA	0	3905.45	0	0	0	0	0	0	0	0	0
MEX	Coal.mines	1979	0	0	0	0	0	0	0	0	0	0	0	0	83.736	0	0	0	NA	0	83.736	0	0	0	0	0	0	0	0	0	0	0	0	88.7602	0	0	0	NA	0	88.7602	0	0	0	0	0	0	0	0	0
MEX	Coal.mines	1980	0	0	0	0	0	0	0	0	0	0	0	0	83.736	0	0	0	NA	0	83.736	0	0	0	0	0	0	0	0	0	0	0	0	88.7602	0	0	0	NA	0	88.7602	0	0	0	0	0	0	0	0	0
MEX	Coal.mines	1981	0	0	0	0	0	0	0	0	0	0	0	0	711.756	0	0	0	NA	0	711.756	0	0	0	0	0	0	0	0	0	0	0	0	754.461	0	0	0	NA	0	754.461	0	0	0	0	0	0	0	0	0
MEX	Coal.mines	1982	0	0	0	0	0	0	0	0	0	0	0	0	0	0	0	0	NA	0	0	0	0	0	0	0	0	0	0	0	0	0	0	0	0	0	0	NA	0	0	0	0	0	0	0	0	0	0	0
MEX	Coal.mines	1983	0	0	0	0	0	0	0	0	0	0	0	0	753.624	0	0	0	NA	0	753.624	0	0	0	0	0	0	0	0	0	0	0	0	798.841	0	0	0	NA	0	798.841	0	0	0	0	0	0	0	0	0
MEX	Coal.mines	1984	0	0	0	0	0	0	0	0	0	0	0	0	1088.57	0	0	0	NA	0	1088.57	0	0	0	0	0	0	0	0	0	0	0	0	1153.88	0	0	0	NA	0	1153.88	0	0	0	0	0	0	0	0	0
MEX	Coal.mines	1985	0	0	0	0	0	0	0	0	0	0	0	0	837.36	0	0	0	NA	0	837.36	0	0	0	0	0	0	0	0	0	0	0	0	887.602	0	0	0	NA	0	887.602	0	0	0	0	0	0	0	0	0
MEX	Coal.mines	1986	0	0	0	0	0	0	0	0	0	0	0	0	962.964	0	0	0	NA	0	962.964	0	0	0	0	0	0	0	0	0	0	0	0	1020.74	0	0	0	NA	0	1020.74	0	0	0	0	0	0	0	0	0
MEX	Coal.mines	1987	0	0	0	0	0	0	0	0	0	0	0	0	0	0	0	0	NA	0	0	0	0	0	0	0	0	0	0	0	0	0	0	0	0	0	0	NA	0	0	0	0	0	0	0	0	0	0	0
MEX	Coal.mines	1988	0	0	0	0	0	0	0	0	0	0	0	0	0	0	0	0	NA	0	0	0	0	0	0	0	0	0	0	0	0	0	0	0	0	0	0	NA	0	0	0	0	0	0	0	0	0	0	0
MEX	Coal.mines	1989	0	0	0	0	0	0	0	0	0	0	0	0	0	0	0	0	NA	0	0	0	0	0	0	0	0	0	0	0	0	0	0	0	0	0	0	NA	0	0	0	0	0	0	0	0	0	0	0
MEX	Coal.mines	1990	0	0	0	0	0	0	0	0	0	0	0	0	0	0	0	0	NA	0	0	0	0	0	0	0	0	0	0	0	0	0	0	0	0	0	0	NA	0	0	0	0	0	0	0	0	0	0	0
MEX	Coal.mines	1991	0	0	0	0	0	0	0	0	0	0	0	0	0	0	0	0	NA	0	0	0	0	0	0	0	0	0	0	0	0	0	0	0	0	0	0	NA	0	0	0	0	0	0	0	0	0	0	0
MEX	Coal.mines	1992	0	0	0	0	0	0	0	0	0	0	0	0	0	0	0	0	NA	0	0	0	0	0	0	0	0	0	0	0	0	0	0	0	0	0	0	NA	0	0	0	0	0	0	0	0	0	0	0
MEX	Coal.mines	1993	0	0	0	0	0	0	0	0	0	0	0	0	0	0	0	0	NA	0	0	0	0	0	0	0	0	0	0	0	0	0	0	0	0	0	0	NA	0	0	0	0	0	0	0	0	0	0	0
MEX	Coal.mines	1994	0	0	0	0	0	0	0	0	0	0	0	0	0	0	0	0	NA	0	0	0	0	0	0	0	0	0	0	0	0	0	0	0	0	0	0	NA	0	0	0	0	0	0	0	0	0	0	0
MEX	Coal.mines	1995	0	0	0	0	0	0	0	0	0	0	0	0	0	0	0	0	NA	0	0	0	0	0	0	0	0	0	0	0	0	0	0	0	0	0	0	NA	0	0	0	0	0	0	0	0	0	0	0
MEX	Coal.mines	1996	0	0	0	0	0	0	0	0	0	0	0	0	0	0	0	0	NA	0	0	0	0	0	0	0	0	0	0	0	0	0	0	0	0	0	0	NA	0	0	0	0	0	0	0	0	0	0	0
MEX	Coal.mines	1997	0	0	0	0	0	0	0	0	0	0	0	0	0	0	0	0	NA	0	0	0	0	0	0	0	0	0	0	0	0	0	0	0	0	0	0	NA	0	0	0	0	0	0	0	0	0	0	0
MEX	Coal.mines	1998	0	0	0	0	0	0	0	0	0	0	0	0	0	0	0	0	NA	0	0	0	0	0	0	0	0	0	0	0	0	0	0	0	0	0	0	NA	0	0	0	0	0	0	0	0	0	0	0
MEX	Coal.mines	1999	0	0	0	0	0	0	0	0	0	0	0	0	0	0	0	0	NA	0	0	0	0	0	0	0	0	0	0	0	0	0	0	0	0	0	0	NA	0	0	0	0	0	0	0	0	0	0	0
MEX	Coal.mines	2000	0	0	0	0	0	0	0	0	0	0	0	0	0	0	0	0	NA	0	0	0	0	0	0	0	0	0	0	0	0	0	0	0	0	0	0	NA	0	0	0	0	0	0	0	0	0	0	0
MEX	Coal.mines	2001	0	0	0	0	0	0	0	0	0	0	0	0	0	0	0	0	NA	0	0	0	0	0	0	0	0	0	0	0	0	0	0	0	0	0	0	NA	0	0	0	0	0	0	0	0	0	0	0
MEX	Coal.mines	2002	0	0	0	0	0	0	0	0	0	0	0	0	0	0	0	0	NA	0	0	0	0	0	0	0	0	0	0	0	0	0	0	0	0	0	0	NA	0	0	0	0	0	0	0	0	0	0	0
MEX	Coal.mines	2003	0	0	0	0	0	0	0	0	0	0	0	0	0	0	0	0	NA	0	0	0	0	0	0	0	0	0	0	0	0	0	0	0	0	0	0	NA	0	0	0	0	0	0	0	0	0	0	0
MEX	Coal.mines	2004	0	0	0	0	0	0	0	0	0	0	0	0	0	0	0	0	NA	0	0	0	0	0	0	0	0	0	0	0	0	0	0	0	0	0	0	NA	0	0	0	0	0	0	0	0	0	0	0
MEX	Coal.mines	2005	0	0	0	0	0	0	0	0	0	0	0	0	0	0	0	0	NA	0	0	0	0	0	0	0	0	0	0	0	0	0	0	0	0	0	0	NA	0	0	0	0	0	0	0	0	0	0	0
MEX	Coal.mines	2006	0	0	0	0	0	0	0	0	0	0	0	0	0	0	0	0	NA	0	0	0	0	0	0	0	0	0	0	0	0	0	0	0	0	0	0	NA	0	0	0	0	0	0	0	0	0	0	0
MEX	Coal.mines	2007	0	0	0	0	0	0	0	0	0	0	0	0	0	0	0	0	NA	0	0	0	0	0	0	0	0	0	0	0	0	0	0	0	0	0	0	NA	0	0	0	0	0	0	0	0	0	0	0
MEX	Coal.mines	2008	0	0	0	0	0	0	0	0	0	0	0	0	0	0	0	0	NA	0	0	0	0	0	0	0	0	0	0	0	0	0	0	0	0	0	0	NA	0	0	0	0	0	0	0	0	0	0	0
MEX	Coal.mines	2009	0	0	0	0	0	0	0	0	0	0	0	0	0	0	0	0	NA	0	0	0	0	0	0	0	0	0	0	0	0	0	0	0	0	0	0	NA	0	0	0	0	0	0	0	0	0	0	0
MEX	Oil.and.gas.extraction	1971	0	0	0	0	0	0	0	0	0	0	0	0	0	45950	0	0	NA	0	45950	0	0	0	0	0	0	0	0	0	0	0	0	0	47788	0	0	NA	0	47788	0	0	0	0	0	47788	0	0	0
MEX	Oil.and.gas.extraction	1972	0	0	0	0	0	0	0	0	0	0	0	0	0	61576	0	0	NA	0	61576	0	0	0	0	0	0	0	0	0	0	0	0	0	64039	0	0	NA	0	64039	0	0	0	0	0	64039	0	0	0
MEX	Oil.and.gas.extraction	1973	0	0	0	0	0	0	0	0	0	0	0	0	0	75584	0	0	NA	0	75584	0	0	0	0	0	0	0	0	0	0	0	0	0	78607.4	0	0	NA	0	78607.4	0	0	0	0	0	78607.4	0	0	0
MEX	Oil.and.gas.extraction	1974	0	0	0	0	0	0	0	0	0	0	0	0	0	99508	0	0	NA	0	99508	0	0	0	0	0	0	0	0	0	0	0	0	0	103488	0	0	NA	0	103488	0	0	0	0	0	103488	0	0	0
MEX	Oil.and.gas.extraction	1975	0	0	0	0	0	0	0	0	0	0	0	0	0	62497	0	0	NA	0	62497	0	0	0	0	0	0	0	0	0	0	0	0	0	64996.9	0	0	NA	0	64996.9	0	0	0	0	0	64996.9	0	0	0
MEX	Oil.and.gas.extraction	1976	0	0	0	0	0	0	0	0	0	0	0	0	0	58874	0	0	NA	0	58874	0	0	0	0	0	0	0	0	0	0	0	0	0	61229	0	0	NA	0	61229	0	0	0	0	0	61229	0	0	0
MEX	Oil.and.gas.extraction	1977	0	0	0	0	0	0	0	0	0	0	0	0	0	72696	0	0	NA	0	72696	0	0	0	0	0	0	0	0	0	0	0	0	0	75603.8	0	0	NA	0	75603.8	0	0	0	0	0	75603.8	0	0	0
MEX	Oil.and.gas.extraction	1978	0	0	0	0	0	0	0	0	0	0	0	0	0	98938	0	0	NA	0	98938	0	0	0	0	0	0	0	0	0	0	0	0	0	102896	0	0	NA	0	102896	0	0	0	0	0	102896	0	0	0
MEX	Oil.and.gas.extraction	1979	0	0	0	0	0	0	0	0	0	0	0	0	0	143808	0	0	NA	0	143808	0	0	0	0	0	0	0	0	0	0	0	0	0	149560	0	0	NA	0	149560	0	0	0	0	0	149560	0	0	0
MEX	Oil.and.gas.extraction	1980	0	0	0	0	0	0	0	0	0	0	0	0	0	160908	0	0	NA	0	160908	0	0	0	0	0	0	0	0	0	0	0	0	0	167344	0	0	NA	0	167344	0	0	0	0	0	167344	0	0	0
MEX	Oil.and.gas.extraction	1981	0	0	0	0	0	0	0	0	0	0	0	0	0	149933	0	0	NA	0	149933	0	0	0	0	0	0	0	0	0	0	0	0	0	155930	0	0	NA	0	155930	0	0	0	0	0	155930	0	0	0
MEX	Oil.and.gas.extraction	1982	0	0	0	0	0	0	0	0	0	0	0	0	0	196277	0	0	NA	0	196277	0	0	0	0	0	0	0	0	0	0	0	0	0	204128	0	0	NA	0	204128	0	0	0	0	0	204128	0	0	0
MEX	Oil.and.gas.extraction	1983	0	0	0	0	0	0	0	0	0	0	0	0	0	174392	0	0	NA	0	174392	0	0	0	0	0	0	0	0	0	0	0	0	0	181368	0	0	NA	0	181368	0	0	0	0	0	181368	0	0	0
MEX	Oil.and.gas.extraction	1984	0	0	0	0	0	0	0	0	0	0	0	0	0	285263	0	0	NA	0	285263	0	0	0	0	0	0	0	0	0	0	0	0	0	296674	0	0	NA	0	296674	0	0	0	0	0	296674	0	0	0
MEX	Oil.and.gas.extraction	1985	0	0	0	0	0	0	0	0	0	0	0	0	0	310974	0	0	NA	0	310974	0	0	0	0	0	0	0	0	0	0	0	0	0	323413	0	0	NA	0	323413	0	0	0	0	0	323413	0	0	0
MEX	Oil.and.gas.extraction	1986	0	0	0	0	0	0	0	0	0	0	0	0	0	261152	0	0	NA	0	261152	0	0	0	0	0	0	0	0	0	0	0	0	0	271598	0	0	NA	0	271598	0	0	0	0	0	271598	0	0	0
MEX	Oil.and.gas.extraction	1987	0	0	0	0	0	0	0	0	0	0	0	0	0	217496	0	0	NA	0	217496	0	0	0	0	0	0	0	0	0	0	0	0	0	226196	0	0	NA	0	226196	0	0	0	0	0	226196	0	0	0
MEX	Oil.and.gas.extraction	1988	0	0	0	0	0	0	0	0	0	0	0	0	0	257857	0	0	NA	0	257857	0	0	0	0	0	0	0	0	0	0	0	0	0	268171	0	0	NA	0	268171	0	0	0	0	0	268171	0	0	0
MEX	Oil.and.gas.extraction	1989	0	0	0	0	0	0	0	0	0	0	0	0	0	245911	0	0	NA	0	245911	0	0	0	0	0	0	0	0	0	0	0	0	0	255747	0	0	NA	0	255747	0	0	0	0	0	255747	0	0	0
MEX	Oil.and.gas.extraction	1990	376.812	0	0	0	0	0	0	0	0	0	0	376.812	0	257317	0	0	NA	0	257694	399.421	0	0	0	0	0	0	0	0	0	0	399.421	0	267610	0	0	NA	0	268009	0	0	0	0	0	267610	0	0	0
MEX	Oil.and.gas.extraction	1991	125.604	0	0	0	0	0	0	0	0	0	0	125.604	0	232070	0	0	NA	0	232196	133.14	0	0	0	0	0	0	0	0	0	0	133.14	0	241353	0	0	NA	0	241486	0	0	0	0	0	241353	0	0	0
MEX	Oil.and.gas.extraction	1992	41.868	0	0	0	0	0	0	0	0	0	0	41.868	0	273523	0	0	NA	0	273565	44.3801	0	0	0	0	0	0	0	0	0	0	44.3801	0	284464	0	0	NA	0	284508	0	0	0	0	0	284464	0	0	0
MEX	Oil.and.gas.extraction	1993	0	0	0	0	0	0	0	0	0	0	0	0	0	259488	0	0	NA	0	259488	0	0	0	0	0	0	0	0	0	0	0	0	0	269868	0	0	NA	0	269868	0	0	0	0	0	269868	0	0	0
MEX	Oil.and.gas.extraction	1994	334.944	0	0	0	0	0	0	0	0	0	0	334.944	0	262005	0	0	NA	0	262340	355.041	0	0	0	0	0	0	0	0	0	0	355.041	0	272485	0	0	NA	0	272840	0	0	0	0	0	272485	0	0	0
MEX	Oil.and.gas.extraction	1995	1172.3	0	0	0	0	0	0	0	0	0	0	1172.3	0	238696	0	0	NA	0	239868	1242.64	0	0	0	0	0	0	0	0	0	0	1242.64	0	248244	0	0	NA	0	249486	0	0	0	0	0	248244	0	0	0
MEX	Oil.and.gas.extraction	1996	0	0	0	0	0	0	0	0	0	0	0	0	0	260000	0	0	NA	0	260000	0	0	0	0	0	0	0	0	0	0	0	0	0	270400	0	0	NA	0	270400	0	0	0	0	0	270400	0	0	0
MEX	Oil.and.gas.extraction	1997	0	0	0	0	0	0	0	0	0	0	0	0	0	235777	0	0	NA	0	235777	0	0	0	0	0	0	0	0	0	0	0	0	0	245208	0	0	NA	0	245208	0	0	0	0	0	245208	0	0	0
MEX	Oil.and.gas.extraction	1998	0	0	0	0	0	0	0	0	0	0	0	0	0	257852	0	0	NA	0	257852	0	0	0	0	0	0	0	0	0	0	0	0	0	268166	0	0	NA	0	268166	0	0	0	0	0	268166	0	0	0
MEX	Oil.and.gas.extraction	1999	0	0	0	0	0	0	0	0	0	0	0	0	0	263445	0	0	NA	0	263445	0	0	0	0	0	0	0	0	0	0	0	0	0	273983	0	0	NA	0	273983	0	0	0	0	0	273983	0	0	0
MEX	Oil.and.gas.extraction	2000	0	0	0	0	0	0	0	0	0	0	0	0	0	286007	0	7610.4	NA	0	293617	0	0	0	0	0	0	0	0	0	0	0	0	0	297447	0	7610.4	NA	0	305058	0	0	0	0	0	297447	3034.49	0	0
MEX	Oil.and.gas.extraction	2001	0	0	0	0	0	0	0	0	0	0	0	0	0	313295	0	12229.2	NA	0	325524	0	0	0	0	0	0	0	0	0	0	0	0	0	325827	0	12229.2	NA	0	338056	0	0	0	0	0	325827	4876.14	0	0
MEX	Oil.and.gas.extraction	2002	0	0	0	0	0	0	0	0	0	0	0	0	0	310234	0	11502	NA	0	321736	0	0	0	0	0	0	0	0	0	0	0	0	0	322643	0	11502	NA	0	334145	0	0	0	0	0	322643	4586.18	0	0
MEX	Oil.and.gas.extraction	2003	0	0	0	0	0	0	0	0	0	0	0	0	0	309348	0	12582	NA	0	321930	0	0	0	0	0	0	0	0	0	0	0	0	0	321722	0	12582	NA	0	334304	0	0	0	0	0	321722	5016.81	0	0
MEX	Oil.and.gas.extraction	2004	0	0	0	0	0	0	0	0	0	0	0	0	0	334530	0	13176	NA	0	347706	0	0	0	0	0	0	0	0	0	0	0	0	0	347911	0	13176	NA	0	361087	0	0	0	0	0	347911	5253.65	0	0
MEX	Oil.and.gas.extraction	2005	0	0	0	0	0	0	0	0	0	0	0	0	0	372711	0	14515.2	NA	0	387226	0	0	0	0	0	0	0	0	0	0	0	0	0	387619	0	14515.2	NA	0	402135	0	0	0	0	0	387619	5787.63	0	0
MEX	Oil.and.gas.extraction	2006	0	0	0	0	0	0	0	0	0	0	0	0	0	402180	0	12852	NA	0	415032	0	0	0	0	0	0	0	0	0	0	0	0	0	418267	0	12852	NA	0	431119	0	0	0	0	0	418267	5124.46	0	0
MEX	Oil.and.gas.extraction	2007	0	0	0	0	0	0	0	0	0	0	0	0	0	455241	0	14648.4	NA	0	469889	0	0	0	0	0	0	0	0	0	0	0	0	0	473451	0	14648.4	NA	0	488099	0	0	0	0	0	473451	5840.73	0	0
MEX	Oil.and.gas.extraction	2008	0	0	0	0	0	0	0	0	0	0	0	0	0	484165	0	16592.4	NA	0	500757	0	0	0	0	0	0	0	0	0	0	0	0	0	503532	0	16592.4	NA	0	520124	0	0	0	0	0	503532	6615.86	0	0
MEX	Oil.and.gas.extraction	2009	0	0	0	0	0	0	0	0	0	0	0	0	0	494905	0	16495.2	NA	0	511400	0	0	0	0	0	0	0	0	0	0	0	0	0	514701	0	16495.2	NA	0	531196	0	0	0	0	0	514701	6577.1	0	0
MEX	Coke.ovens	1971	0	0	0	0	0	0	0	0	0	0	0	0	1004.83	0	0	0	NA	0	1004.83	0	0	0	0	0	0	0	0	0	0	0	0	1065.12	0	0	0	NA	0	1065.12	0	0	0	0	0	0	0	0	1065.12
MEX	Coke.ovens	1972	0	0	0	0	0	0	0	0	0	0	0	0	1549.12	0	0	0	NA	0	1549.12	0	0	0	0	0	0	0	0	0	0	0	0	1642.06	0	0	0	NA	0	1642.06	0	0	0	0	0	0	0	0	1642.06
MEX	Coke.ovens	1973	0	0	0	0	0	0	0	0	0	0	0	0	1088.57	0	0	0	NA	0	1088.57	0	0	0	0	0	0	0	0	0	0	0	0	1153.88	0	0	0	NA	0	1153.88	0	0	0	0	0	0	0	0	1153.88
MEX	Coke.ovens	1974	0	0	0	0	0	0	0	0	0	0	0	0	1339.78	0	0	0	NA	0	1339.78	0	0	0	0	0	0	0	0	0	0	0	0	1420.16	0	0	0	NA	0	1420.16	0	0	0	0	0	0	0	0	1420.16
MEX	Coke.ovens	1975	0	0	0	0	0	0	0	0	0	0	0	0	1758.46	0	0	0	NA	0	1758.46	0	0	0	0	0	0	0	0	0	0	0	0	1863.96	0	0	0	NA	0	1863.96	0	0	0	0	0	0	0	0	1863.96
MEX	Coke.ovens	1976	0	0	0	0	0	0	0	0	0	0	0	0	1297.91	0	0	0	NA	0	1297.91	0	0	0	0	0	0	0	0	0	0	0	0	1375.78	0	0	0	NA	0	1375.78	0	0	0	0	0	0	0	0	1375.78
MEX	Coke.ovens	1977	0	0	0	0	0	0	0	0	0	0	0	0	1381.64	0	0	0	NA	0	1381.64	0	0	0	0	0	0	0	0	0	0	0	0	1464.54	0	0	0	NA	0	1464.54	0	0	0	0	0	0	0	0	1464.54
MEX	Coke.ovens	1978	0	0	0	0	0	0	0	0	0	0	0	0	1549.12	0	0	0	NA	0	1549.12	0	0	0	0	0	0	0	0	0	0	0	0	1642.06	0	0	0	NA	0	1642.06	0	0	0	0	0	0	0	0	1642.06
MEX	Coke.ovens	1979	0	0	0	0	0	0	0	0	0	0	0	0	1758.46	0	0	0	NA	0	1758.46	0	0	0	0	0	0	0	0	0	0	0	0	1863.96	0	0	0	NA	0	1863.96	0	0	0	0	0	0	0	0	1863.96
MEX	Coke.ovens	1980	0	0	0	0	0	0	0	0	0	0	0	0	1674.72	0	0	0	NA	0	1674.72	0	0	0	0	0	0	0	0	0	0	0	0	1775.2	0	0	0	NA	0	1775.2	0	0	0	0	0	0	0	0	1775.2
MEX	Coke.ovens	1981	0	0	0	0	0	0	0	0	0	0	0	0	1758.46	0	0	0	NA	0	1758.46	0	0	0	0	0	0	0	0	0	0	0	0	1863.96	0	0	0	NA	0	1863.96	0	0	0	0	0	0	0	0	1863.96
MEX	Coke.ovens	1982	0	0	0	0	0	0	0	0	0	0	0	0	3056.36	0	0	0	NA	0	3056.36	0	0	0	0	0	0	0	0	0	0	0	0	3239.75	0	0	0	NA	0	3239.75	0	0	0	0	0	0	0	0	3239.75
MEX	Coke.ovens	1983	0	0	0	0	0	0	0	0	0	0	0	0	6950.09	0	0	0	NA	0	6950.09	0	0	0	0	0	0	0	0	0	0	0	0	7367.09	0	0	0	NA	0	7367.09	0	0	0	0	0	0	0	0	7367.09
MEX	Coke.ovens	1984	0	0	0	0	0	0	0	0	0	0	0	0	334.944	0	0	0	NA	0	334.944	0	0	0	0	0	0	0	0	0	0	0	0	355.041	0	0	0	NA	0	355.041	0	0	0	0	0	0	0	0	355.041
MEX	Coke.ovens	1985	0	0	0	0	0	0	0	0	0	0	0	0	3851.86	0	0	0	NA	0	3851.86	0	0	0	0	0	0	0	0	0	0	0	0	4082.97	0	0	0	NA	0	4082.97	0	0	0	0	0	0	0	0	4082.97
MEX	Coke.ovens	1986	0	0	0	0	0	0	0	0	0	0	0	0	2512.08	0	0	0	NA	0	2512.08	0	0	0	0	0	0	0	0	0	0	0	0	2662.8	0	0	0	NA	0	2662.8	0	0	0	0	0	0	0	0	2662.8
MEX	Coke.ovens	1987	0	0	0	0	0	0	0	0	0	0	0	0	167.472	0	0	0	NA	0	167.472	0	0	0	0	0	0	0	0	0	0	0	0	177.52	0	0	0	NA	0	177.52	0	0	0	0	0	0	0	0	177.52
MEX	Coke.ovens	1988	0	0	0	0	0	0	0	0	0	0	0	0	209.34	0	0	0	NA	0	209.34	0	0	0	0	0	0	0	0	0	0	0	0	221.9	0	0	0	NA	0	221.9	0	0	0	0	0	0	0	0	221.9
MEX	Coke.ovens	1989	0	0	0	0	0	0	0	0	0	0	0	0	251.208	0	0	0	NA	0	251.208	0	0	0	0	0	0	0	0	0	0	0	0	266.28	0	0	0	NA	0	266.28	0	0	0	0	0	0	0	0	266.28
MEX	Coke.ovens	1990	0	0	0	0	0	0	0	0	0	0	0	0	2386.48	0	0	0	NA	0	2386.48	0	0	0	0	0	0	0	0	0	0	0	0	2529.66	0	0	0	NA	0	2529.66	0	0	0	0	0	0	0	0	2529.66
MEX	Coke.ovens	1991	0	0	0	0	0	0	0	0	0	0	0	0	2302.74	0	0	0	NA	0	2302.74	0	0	0	0	0	0	0	0	0	0	0	0	2440.9	0	0	0	NA	0	2440.9	0	0	0	0	0	0	0	0	2440.9
MEX	Coke.ovens	1992	0	0	0	0	0	0	0	0	0	0	0	0	1549.12	0	0	0	NA	0	1549.12	0	0	0	0	0	0	0	0	0	0	0	0	1642.06	0	0	0	NA	0	1642.06	0	0	0	0	0	0	0	0	1642.06
MEX	Coke.ovens	1993	0	0	0	0	0	0	0	0	0	0	0	0	1423.51	0	0	0	NA	0	1423.51	0	0	0	0	0	0	0	0	0	0	0	0	1508.92	0	0	0	NA	0	1508.92	0	0	0	0	0	0	0	0	1508.92
MEX	Coke.ovens	1994	0	0	0	0	0	0	0	0	0	0	0	0	1549.12	0	0	0	NA	0	1549.12	0	0	0	0	0	0	0	0	0	0	0	0	1642.06	0	0	0	NA	0	1642.06	0	0	0	0	0	0	0	0	1642.06
MEX	Coke.ovens	1995	0	0	0	0	0	0	0	0	0	0	0	0	1716.59	0	0	0	NA	0	1716.59	0	0	0	0	0	0	0	0	0	0	0	0	1819.58	0	0	0	NA	0	1819.58	0	0	0	0	0	0	0	0	1819.58
MEX	Coke.ovens	1996	0	0	0	0	0	0	0	0	0	0	0	0	1632.85	0	0	0	NA	0	1632.85	0	0	0	0	0	0	0	0	0	0	0	0	1730.82	0	0	0	NA	0	1730.82	0	0	0	0	0	0	0	0	1730.82
MEX	Coke.ovens	1997	0	0	0	0	0	0	0	0	0	0	0	0	1716.59	0	0	0	NA	0	1716.59	0	0	0	0	0	0	0	0	0	0	0	0	1819.58	0	0	0	NA	0	1819.58	0	0	0	0	0	0	0	0	1819.58
MEX	Coke.ovens	1998	0	0	0	0	0	0	0	0	0	0	0	0	1758.46	0	0	0	NA	0	1758.46	0	0	0	0	0	0	0	0	0	0	0	0	1863.96	0	0	0	NA	0	1863.96	0	0	0	0	0	0	0	0	1863.96
MEX	Coke.ovens	1999	0	0	0	0	0	0	0	0	0	0	0	0	1590.98	0	0	0	NA	0	1590.98	0	0	0	0	0	0	0	0	0	0	0	0	1686.44	0	0	0	NA	0	1686.44	0	0	0	0	0	0	0	0	1686.44
MEX	Coke.ovens	2000	0	0	0	0	0	0	0	0	0	0	0	0	1842.19	0	0	0	NA	0	1842.19	0	0	0	0	0	0	0	0	0	0	0	0	1952.72	0	0	0	NA	0	1952.72	0	0	0	0	0	0	0	0	1952.72
MEX	Coke.ovens	2001	0	0	0	0	0	0	0	0	0	0	0	0	1590.98	0	0	0	NA	0	1590.98	0	0	0	0	0	0	0	0	0	0	0	0	1686.44	0	0	0	NA	0	1686.44	0	0	0	0	0	0	0	0	1686.44
MEX	Coke.ovens	2002	0	0	0	0	0	0	0	0	0	0	0	0	1716.59	0	0	0	NA	0	1716.59	0	0	0	0	0	0	0	0	0	0	0	0	1819.58	0	0	0	NA	0	1819.58	0	0	0	0	0	0	0	0	1819.58
MEX	Coke.ovens	2003	0	0	0	0	0	0	0	0	0	0	0	0	1381.64	0	0	0	NA	0	1381.64	0	0	0	0	0	0	0	0	0	0	0	0	1464.54	0	0	0	NA	0	1464.54	0	0	0	0	0	0	0	0	1464.54
MEX	Coke.ovens	2004	0	0	0	0	0	0	0	0	0	0	0	0	1758.46	0	0	0	NA	0	1758.46	0	0	0	0	0	0	0	0	0	0	0	0	1863.96	0	0	0	NA	0	1863.96	0	0	0	0	0	0	0	0	1863.96
MEX	Coke.ovens	2005	0	0	0	0	0	0	0	0	0	0	0	0	1632.85	0	0	0	NA	0	1632.85	0	0	0	0	0	0	0	0	0	0	0	0	1730.82	0	0	0	NA	0	1730.82	0	0	0	0	0	0	0	0	1730.82
MEX	Coke.ovens	2006	0	0	0	0	0	0	0	0	0	0	0	0	1674.72	0	0	0	NA	0	1674.72	0	0	0	0	0	0	0	0	0	0	0	0	1775.2	0	0	0	NA	0	1775.2	0	0	0	0	0	0	0	0	1775.2
MEX	Coke.ovens	2007	0	0	0	0	0	0	0	0	0	0	0	0	1674.72	0	0	0	NA	0	1674.72	0	0	0	0	0	0	0	0	0	0	0	0	1775.2	0	0	0	NA	0	1775.2	0	0	0	0	0	0	0	0	1775.2
MEX	Coke.ovens	2008	0	0	0	0	0	0	0	0	0	0	0	0	1758.46	0	0	0	NA	0	1758.46	0	0	0	0	0	0	0	0	0	0	0	0	1863.96	0	0	0	NA	0	1863.96	0	0	0	0	0	0	0	0	1863.96
MEX	Coke.ovens	2009	0	0	0	0	0	0	0	0	0	0	0	0	4438.01	0	0	0	NA	0	4438.01	0	0	0	0	0	0	0	0	0	0	0	0	4704.29	0	0	0	NA	0	4704.29	0	0	0	0	0	0	0	0	4704.29
MEX	Oil.refineries	1971	0	9545.9	15449.3	10173.9	0	8080.52	31735.9	27172.3	0	1590.98	9629.64	113379	0	0	0	0	NA	0	113379	0	10118.7	16376.2	10784.4	0	8565.36	33640.1	28802.7	0	1686.44	10207.4	120181	0	0	0	0	NA	0	120181	0	10784.4	0	33640.1	0	0	0	0	0
MEX	Oil.refineries	1972	0	9587.77	22776.2	15072.5	0	4228.67	17459	75069.3	0	1339.78	7201.3	152734	0	0	0	0	NA	0	152734	0	10163	24142.8	15976.8	0	4482.39	18506.5	79573.5	0	1420.16	7633.37	161899	0	0	0	0	NA	0	161899	0	15976.8	0	18506.5	0	0	0	0	0
MEX	Oil.refineries	1973	0	9713.38	28260.9	16077.3	0	8373.6	39104.7	81391.4	0	2512.08	10676.3	196110	0	0	0	0	NA	0	196110	0	10296.2	29956.6	17042	0	8876.02	41451	86274.9	0	2662.8	11316.9	207876	0	0	0	0	NA	0	207876	0	17042	0	41451	0	0	0	0	0
MEX	Oil.refineries	1974	0	12309.2	27046.7	12016.1	0	8499.2	42998.4	67616.8	0	1800.32	12476.7	184763	0	0	0	0	NA	0	184763	0	13047.7	28669.5	12737.1	0	9009.16	45578.3	71673.8	0	1908.34	13225.3	195849	0	0	0	0	NA	0	195849	0	12737.1	0	45578.3	0	0	0	0	0
MEX	Oil.refineries	1975	0	7494.37	7075.69	12016.1	0	4270.54	17375.2	60038.7	0	1758.46	7703.71	117733	0	0	0	0	NA	0	117733	0	7944.03	7500.23	12737.1	0	4526.77	18417.7	63641	0	1863.96	8165.93	124797	0	0	0	0	NA	0	124797	0	12737.1	0	18417.7	0	0	0	0	0
MEX	Oil.refineries	1976	0	8792.28	4019.33	25581.3	0	6070.86	27967.8	44547.6	0	2009.66	10467	129456	0	0	0	0	NA	0	129456	0	9319.82	4260.49	27116.2	0	6435.11	29645.9	47220.4	0	2130.24	11095	137223	0	0	0	0	NA	0	137223	0	27116.2	0	29645.9	0	0	0	0	0
MEX	Oil.refineries	1977	0	12560.4	4814.82	9922.72	0	10215.8	30396.2	114300	0	586.152	9504.04	192300	0	0	0	0	NA	0	192300	0	13314	5103.71	10518.1	0	10828.7	32219.9	121158	0	621.321	10074.3	203838	0	0	0	0	NA	0	203838	0	10518.1	0	32219.9	0	0	0	0	0
MEX	Oil.refineries	1978	0	12644.1	3977.46	11723	0	7829.32	27256.1	86248.1	0	0	11471.8	161150	0	0	0	0	NA	0	161150	0	13402.8	4216.11	12426.4	0	8299.07	28891.4	91423	0	0	12160.1	170819	0	0	0	0	NA	0	170819	0	12426.4	0	28891.4	0	0	0	0	0
MEX	Oil.refineries	1979	0	14151.4	7913.05	17124	0	10969.4	29600.7	66109.6	0	1465.38	8541.07	155875	0	0	0	0	NA	0	155875	0	15000.5	8387.84	18151.5	0	11627.6	31376.7	70076.1	0	1553.3	9053.54	165227	0	0	0	0	NA	0	165227	0	18151.5	0	31376.7	0	0	0	0	0
MEX	Oil.refineries	1980	0	18045.1	11471.8	17752	0	7829.32	57317.3	94872.9	0	1088.57	11178.8	219556	0	0	0	0	NA	0	219556	0	19127.8	12160.1	18817.2	0	8299.07	60756.3	100565	0	1153.88	11849.5	232729	0	0	0	0	NA	0	232729	0	18817.2	0	60756.3	0	0	0	0	0
MEX	Oil.refineries	1981	0	18380.1	21729.5	16537.9	0	8750.41	61880.9	111704	0	1214.17	12058	252255	0	0	0	0	NA	0	252255	0	19482.9	23033.3	17530.1	0	9275.44	65593.8	118406	0	1287.02	12781.5	267390	0	0	0	0	NA	0	267390	0	17530.1	0	65593.8	0	0	0	0	0
MEX	Oil.refineries	1982	0	19175.5	25288.3	14402.6	0	18840.6	54763.3	116100	0	2302.74	7243.16	258116	0	0	0	0	NA	0	258116	0	20326.1	26805.6	15266.7	0	19971	58049.1	123066	0	2440.9	7677.75	273603	0	0	0	0	NA	0	273603	0	15266.7	0	58049.1	0	0	0	0	0
MEX	Oil.refineries	1983	0	21687.6	21897	25874.4	0	17793.9	25120.8	89178.8	0	2219	8331.73	212103	0	0	0	0	NA	0	212103	0	22988.9	23210.8	27426.9	0	18861.5	26628	94529.6	0	2352.14	8831.64	224829	0	0	0	0	NA	0	224829	0	27426.9	0	26628	0	0	0	0	0
MEX	Oil.refineries	1984	0	14151.4	4228.67	4898.56	0	17626.4	37555.6	106680	0	962.964	11723	197826	0	0	0	0	NA	0	197826	0	15000.5	4482.39	5192.47	0	18684	39808.9	113080	0	1020.74	12426.4	209696	0	0	0	0	NA	0	209696	0	5192.47	0	39808.9	0	0	0	0	0
MEX	Oil.refineries	1985	0	18966.2	1172.3	28219	0	19426.8	61462.2	83484.8	0	962.964	1925.93	215620	0	0	0	0	NA	0	215620	0	20104.2	1242.64	29912.2	0	20592.4	65150	88493.9	0	1020.74	2041.48	228557	0	0	0	0	NA	0	228557	0	29912.2	0	65150	0	0	0	0	0
MEX	Oil.refineries	1986	0	21268.9	16119.2	31275.4	0	17040.3	70798.8	109359	0	0	11304.4	277166	0	0	0	0	NA	0	277166	0	22545.1	17086.3	33151.9	0	18062.7	75046.7	115921	0	0	11982.6	293796	0	0	0	0	NA	0	293796	0	33151.9	0	75046.7	0	0	0	0	0
MEX	Oil.refineries	1987	0	21729.5	21729.5	26460.6	0	16705.3	68286.7	96631.3	0	125.604	8248	259917	0	0	0	0	NA	0	259917	0	23033.3	23033.3	28048.2	0	17707.7	72383.9	102429	0	133.14	8742.88	275512	0	0	0	0	NA	0	275512	0	28048.2	0	72383.9	0	0	0	0	0
MEX	Oil.refineries	1988	0	26921.1	22734.3	11597.4	0	15574.9	39649	116728	0	41.868	4019.33	237266	0	0	0	0	NA	0	237266	0	28536.4	24098.4	12293.3	0	16509.4	42027.9	123732	0	44.3801	4260.49	251502	0	0	0	0	NA	0	251502	0	12293.3	0	42027.9	0	0	0	0	0
MEX	Oil.refineries	1989	0	30145	31401	10173.9	0	17668.3	47603.9	118696	0	879.228	4312.4	260880	0	0	0	0	NA	0	260880	0	31953.7	33285.1	10784.4	0	18728.4	50460.2	125818	0	931.982	4571.15	276532	0	0	0	0	NA	0	276532	0	10784.4	0	50460.2	0	0	0	0	0
MEX	Oil.refineries	1990	0	34666.7	24074.1	69668.4	0	14946.9	41909.9	27172.3	0	1088.57	0	213527	0	0	0	0	NA	0	213527	0	36746.7	25518.5	73848.5	0	15843.7	44424.5	28802.7	0	1153.88	0	226338	0	0	0	0	NA	0	226338	0	73848.5	0	44424.5	0	0	0	0	0
MEX	Oil.refineries	1991	0	47729.5	26963	91314.1	0	6405.8	63681.2	110992	0	2888.89	0	349975	0	0	0	0	NA	0	349975	0	50593.3	28580.8	96793	0	6790.15	67502.1	117652	0	3062.23	0	370973	0	0	0	0	NA	0	370973	0	96793	0	67502.1	0	0	0	0	0
MEX	Oil.refineries	1992	0	45259.3	28972.7	65439.7	0	10383.3	57777.8	116142	0	2512.08	0	326487	0	0	0	0	NA	0	326487	0	47974.9	30711	69366.1	0	11006.3	61244.5	123110	0	2662.8	0	346076	0	0	0	0	NA	0	346076	0	69366.1	0	61244.5	0	0	0	0	0
MEX	Oil.refineries	1993	0	46054.8	29684.4	48943.7	0	16370.4	12727.9	121794	2512.08	0	0	278087	0	55660	0	0	NA	0	333747	0	48818.1	31465.5	51880.3	0	17352.6	13491.5	129102	2662.8	0	0	294772	0	57886.4	0	0	NA	0	352659	0	51880.3	0	13491.5	0	0	0	0	0
MEX	Oil.refineries	1994	0	57024.2	30103.1	24744	0	12686	41198.1	119408	2512.08	0	0	287675	0	58216	0	0	NA	0	345891	0	60445.7	31909.3	26228.6	0	13447.2	43670	126572	2662.8	0	0	304936	0	60544.6	0	0	NA	0	365480	0	26228.6	0	43670	0	0	0	0	0
MEX	Oil.refineries	1995	0	54386.5	27800.4	24409	0	6950.09	36885.7	122715	2177.14	0	0	275324	0	57285	0	0	NA	0	332609	0	57649.7	29468.4	25873.6	0	7367.09	39098.9	130078	2307.76	0	0	291843	0	59576.4	0	0	NA	0	351420	0	25873.6	0	39098.9	0	0	0	0	0
MEX	Oil.refineries	1996	0	42872.8	24074.1	22357.5	0	4563.61	38309.2	122129	3809.99	0	0	258116	0	61279	0	0	NA	0	319395	0	45445.2	25518.5	23699	0	4837.43	40607.8	129457	4038.59	0	0	273603	0	63730.2	0	0	NA	0	337333	0	23699	0	40607.8	0	0	0	0	0
MEX	Oil.refineries	1997	0	61964.6	15909.8	7033.82	0	418.68	40946.9	113546	6280.2	0	0	246100	0	74019	0	0	NA	0	320119	0	65682.5	16864.4	7455.85	0	443.801	43403.7	120359	6657.01	0	0	260866	0	76979.8	0	0	NA	0	337846	0	7455.85	0	43403.7	0	0	0	0	0
MEX	Oil.refineries	1998	0	61462.2	14444.5	44338.2	0	3181.97	49822.9	105591	5317.24	0	0	284158	0	79330	0	0	NA	0	363488	0	65150	15311.1	46998.5	0	3372.89	52812.3	111927	5636.27	0	0	301208	0	82503.2	0	0	NA	0	383711	0	46998.5	0	52812.3	0	0	0	0	0
MEX	Oil.refineries	1999	0	93030.7	8122.39	44924.4	0	83.736	23571.7	97719.9	4061.2	0	0	271514	0	80801	0	0	NA	0	352315	0	98612.5	8609.74	47619.8	0	88.7602	24986	103583	4304.87	0	0	287805	0	84033	0	0	NA	0	371838	0	47619.8	0	24986	0	0	0	0	0
MEX	Oil.refineries	2000	0	90141.8	9294.7	35294.7	0	0	22901.8	91942.1	6363.94	0	0	255939	0	84024	0	8535.6	NA	0	348499	0	95550.3	9852.38	37412.4	0	0	24275.9	97458.7	6745.77	0	0	271295	0	87385	0	8535.6	NA	0	367216	0	37412.4	0	24275.9	0	0	3403.4	0	0
MEX	Oil.refineries	2001	0	83777.9	10048.3	32950.1	0	0	25790.7	84866.4	4019.33	0	0	241453	0	94222	0	8766	NA	0	344441	0	88804.5	10651.2	34927.1	0	0	27338.1	89958.4	4260.49	0	0	255940	0	97990.9	0	8766	NA	0	362697	0	34927.1	0	27338.1	0	0	3495.26	0	0
MEX	Oil.refineries	2002	0	79549.2	5359.1	30396.2	0	0	24283.4	91104.8	5400.97	0	0	236094	0	97498	0	8989.2	NA	0	342581	0	84322.2	5680.65	32219.9	0	0	25740.4	96571.1	5725.03	0	0	250259	0	101398	0	8989.2	NA	0	360646	0	32219.9	0	25740.4	0	0	3584.26	0	0
MEX	Oil.refineries	2003	0	110406	6740.75	15198.1	0	0	25874.4	99604	6112.73	0	0	263936	0	108850	0	11282.4	NA	0	384068	0	117030	7145.19	16110	0	0	27426.9	105580	6479.49	0	0	279772	0	113204	0	11282.4	NA	0	404258	0	16110	0	27426.9	0	0	4498.62	0	0
MEX	Oil.refineries	2004	0	107475	8289.86	16244.8	0	0	33368.8	102953	5861.52	0	0	274194	0	103236	0	11584.8	NA	0	389014	0	113924	8787.26	17219.5	0	0	35370.9	109131	6213.21	0	0	290645	0	107365	0	11584.8	NA	0	409595	0	17219.5	0	35370.9	0	0	4619.19	0	0
MEX	Oil.refineries	2005	0	120831	7954.92	15784.2	0	0	34457.4	94579.8	5777.78	0	0	279385	0	108903	0	11120.4	NA	0	399409	0	128081	8432.22	16731.3	0	0	36524.8	100255	6124.45	0	0	296148	0	113259	0	11120.4	NA	0	420528	0	16731.3	0	36524.8	0	0	4434.02	0	0
MEX	Oil.refineries	2006	0	122003	7745.58	15700.5	0	0	31401	87755.3	9127.22	0	0	273733	0	112278	0	10537.2	NA	0	396548	0	129324	8210.31	16642.5	0	0	33285.1	93020.6	9674.86	0	0	290157	0	116769	0	10537.2	NA	0	417463	0	16642.5	0	33285.1	0	0	4201.48	0	0
MEX	Oil.refineries	2007	0	118780	7243.16	15826.1	0	0	36006.5	87043.6	5442.84	0	0	270342	0	112121	0	9896.4	NA	0	392359	0	125906	7677.75	16775.7	0	0	38166.9	92266.2	5769.41	0	0	286562	0	116606	0	9896.4	NA	0	413064	0	16775.7	0	38166.9	0	0	3945.97	0	0
MEX	Oil.refineries	2008	0	118486	6698.88	15616.8	0	0	36969.4	85075.8	4647.35	0	0	267495	0	120791	0	10792.8	NA	0	399078	0	125596	7100.81	16553.8	0	0	39187.6	90180.3	4926.19	0	0	283544	0	125623	0	10792.8	NA	0	419960	0	16553.8	0	39187.6	0	0	4303.39	0	0
MEX	Oil.refineries	2009	0	118110	6615.14	16412.3	0	0	41784.3	78042	3809.99	0	0	264773	0	116599	0	9957.6	NA	0	391330	0	125196	7012.05	17397	0	0	44291.3	82724.5	4038.59	0	0	280660	0	121263	0	9957.6	NA	0	411880	0	17397	0	44291.3	0	0	3970.37	0	0
MEX	CHP.and.heat.plants	1971	0	0	0	0	0	0	0	0	0	0	0	0	0	0	0	3654	NA	0	3654	0	0	0	0	0	0	0	0	0	0	0	0	0	0	0	3654	NA	0	3654	0	0	0	0	0	0	1767.34	0	0
MEX	CHP.and.heat.plants	1972	0	0	0	0	0	0	0	0	0	0	0	0	0	0	0	4338	NA	0	4338	0	0	0	0	0	0	0	0	0	0	0	0	0	0	0	4338	NA	0	4338	0	0	0	0	0	0	2109.14	0	0
MEX	CHP.and.heat.plants	1973	0	0	0	0	0	0	0	0	0	0	0	0	0	0	0	4471.2	NA	0	4471.2	0	0	0	0	0	0	0	0	0	0	0	0	0	0	0	4471.2	NA	0	4471.2	0	0	0	0	0	0	2185.22	0	0
MEX	CHP.and.heat.plants	1974	0	0	0	0	0	0	0	0	0	0	0	0	0	0	0	5324.4	NA	0	5324.4	0	0	0	0	0	0	0	0	0	0	0	0	0	0	0	5324.4	NA	0	5324.4	0	0	0	0	0	0	2615.72	0	0
MEX	CHP.and.heat.plants	1975	0	0	0	0	0	0	0	0	0	0	0	0	0	0	0	5864.4	NA	0	5864.4	0	0	0	0	0	0	0	0	0	0	0	0	0	0	0	5864.4	NA	0	5864.4	0	0	0	0	0	0	2895.9	0	0
MEX	CHP.and.heat.plants	1976	0	0	0	0	0	0	0	0	0	0	0	0	0	0	0	6872.4	NA	0	6872.4	0	0	0	0	0	0	0	0	0	0	0	0	0	0	0	6872.4	NA	0	6872.4	0	0	0	0	0	0	3411.16	0	0
MEX	CHP.and.heat.plants	1977	0	0	0	0	0	0	0	0	0	0	0	0	0	0	0	7372.8	NA	0	7372.8	0	0	0	0	0	0	0	0	0	0	0	0	0	0	0	7372.8	NA	0	7372.8	0	0	0	0	0	0	3678.33	0	0
MEX	CHP.and.heat.plants	1978	0	0	0	0	0	0	0	0	0	0	0	0	0	0	0	8510.4	NA	0	8510.4	0	0	0	0	0	0	0	0	0	0	0	0	0	0	0	8510.4	NA	0	8510.4	0	0	0	0	0	0	4267.62	0	0
MEX	CHP.and.heat.plants	1979	0	0	0	0	0	0	0	0	0	0	0	0	0	0	0	9201.6	NA	0	9201.6	0	0	0	0	0	0	0	0	0	0	0	0	0	0	0	9201.6	NA	0	9201.6	0	0	0	0	0	0	4637.77	0	0
MEX	CHP.and.heat.plants	1980	0	0	0	0	0	0	0	0	0	0	0	0	0	0	0	10638	NA	0	10638	0	0	0	0	0	0	0	0	0	0	0	0	0	0	0	10638	NA	0	10638	0	0	0	0	0	0	5389.01	0	0
MEX	CHP.and.heat.plants	1981	0	0	0	0	0	0	0	0	0	0	0	0	0	0	0	8085.6	NA	0	8085.6	0	0	0	0	0	0	0	0	0	0	0	0	0	0	0	8085.6	NA	0	8085.6	0	0	0	0	0	0	4049	0	0
MEX	CHP.and.heat.plants	1982	0	0	0	0	0	0	0	0	0	0	0	0	0	0	0	6310.8	NA	0	6310.8	0	0	0	0	0	0	0	0	0	0	0	0	0	0	0	6310.8	NA	0	6310.8	0	0	0	0	0	0	3123	0	0
MEX	CHP.and.heat.plants	1983	0	0	0	0	0	0	0	0	0	0	0	0	0	0	0	13892.4	NA	0	13892.4	0	0	0	0	0	0	0	0	0	0	0	0	0	0	0	13892.4	NA	0	13892.4	0	0	0	0	0	0	6791.65	0	0
MEX	CHP.and.heat.plants	1984	0	0	0	0	0	0	0	0	0	0	0	0	0	0	0	14400	NA	0	14400	0	0	0	0	0	0	0	0	0	0	0	0	0	0	0	14400	NA	0	14400	0	0	0	0	0	0	6952.23	0	0
MEX	CHP.and.heat.plants	1985	0	0	0	0	0	0	0	0	0	0	0	0	0	0	0	15188.4	NA	0	15188.4	0	0	0	0	0	0	0	0	0	0	0	0	0	0	0	15188.4	NA	0	15188.4	0	0	0	0	0	0	7239.1	0	0
MEX	CHP.and.heat.plants	1986	0	0	0	0	0	0	0	0	0	0	0	0	0	0	0	17344.8	NA	0	17344.8	0	0	0	0	0	0	0	0	0	0	0	0	0	0	0	17344.8	NA	0	17344.8	0	0	0	0	0	0	8158.16	0	0
MEX	CHP.and.heat.plants	1987	0	0	0	0	0	0	0	0	0	0	0	0	0	0	0	19213.2	NA	0	19213.2	0	0	0	0	0	0	0	0	0	0	0	0	0	0	0	19213.2	NA	0	19213.2	0	0	0	0	0	0	8914.68	0	0
MEX	CHP.and.heat.plants	1988	0	0	0	0	0	0	0	0	0	0	0	0	0	0	0	19994.4	NA	0	19994.4	0	0	0	0	0	0	0	0	0	0	0	0	0	0	0	19994.4	NA	0	19994.4	0	0	0	0	0	0	9147.93	0	0
MEX	CHP.and.heat.plants	1989	0	0	0	0	0	0	0	0	0	0	0	0	0	0	0	21016.8	NA	0	21016.8	0	0	0	0	0	0	0	0	0	0	0	0	0	0	0	21016.8	NA	0	21016.8	0	0	0	0	0	0	9477.78	0	0
MEX	CHP.and.heat.plants	1990	0	0	0	0	0	0	0	0	0	0	0	0	0	0	0	20973.6	NA	0	20973.6	0	0	0	0	0	0	0	0	0	0	0	0	0	0	0	20973.6	NA	0	20973.6	0	0	0	0	0	0	9318.51	0	0
MEX	CHP.and.heat.plants	1991	0	0	0	0	0	0	0	0	0	0	0	0	0	0	0	23709.6	NA	0	23709.6	0	0	0	0	0	0	0	0	0	0	0	0	0	0	0	23709.6	NA	0	23709.6	0	0	0	0	0	0	10419.4	0	0
MEX	CHP.and.heat.plants	1992	0	0	0	0	0	0	0	0	0	0	0	0	0	0	0	23680.8	NA	0	23680.8	0	0	0	0	0	0	0	0	0	0	0	0	0	0	0	23680.8	NA	0	23680.8	0	0	0	0	0	0	10293.8	0	0
MEX	CHP.and.heat.plants	1993	0	0	0	0	0	0	0	0	0	0	0	0	0	0	0	24231.6	NA	0	24231.6	0	0	0	0	0	0	0	0	0	0	0	0	0	0	0	24231.6	NA	0	24231.6	0	0	0	0	0	0	10419.2	0	0
MEX	CHP.and.heat.plants	1994	0	0	0	0	0	0	0	0	0	0	0	0	0	0	0	27100.8	NA	0	27100.8	0	0	0	0	0	0	0	0	0	0	0	0	0	0	0	27100.8	NA	0	27100.8	0	0	0	0	0	0	11527.1	0	0
MEX	CHP.and.heat.plants	1995	0	0	0	0	0	0	0	0	0	0	0	0	0	0	0	25826.4	NA	0	25826.4	0	0	0	0	0	0	0	0	0	0	0	0	0	0	0	25826.4	NA	0	25826.4	0	0	0	0	0	0	10866.8	0	0
MEX	CHP.and.heat.plants	1996	0	0	0	0	0	0	0	0	0	0	0	0	0	0	0	26953.2	NA	0	26953.2	0	0	0	0	0	0	0	0	0	0	0	0	0	0	0	26953.2	NA	0	26953.2	0	0	0	0	0	0	11219	0	0
MEX	CHP.and.heat.plants	1997	0	0	0	0	0	0	0	0	0	0	0	0	0	0	0	30499.2	NA	0	30499.2	0	0	0	0	0	0	0	0	0	0	0	0	0	0	0	30499.2	NA	0	30499.2	0	0	0	0	0	0	12558.9	0	0
MEX	CHP.and.heat.plants	1998	0	0	0	0	0	0	0	0	0	0	0	0	0	0	0	33307.2	NA	0	33307.2	0	0	0	0	0	0	0	0	0	0	0	0	0	0	0	33307.2	NA	0	33307.2	0	0	0	0	0	0	13568.4	0	0
MEX	CHP.and.heat.plants	1999	0	0	0	0	0	0	0	0	0	0	0	0	0	0	0	33152.4	NA	0	33152.4	0	0	0	0	0	0	0	0	0	0	0	0	0	0	0	33152.4	NA	0	33152.4	0	0	0	0	0	0	13361.2	0	0
MEX	CHP.and.heat.plants	2000	0	0	0	0	0	0	0	0	0	0	0	0	0	0	0	35859.6	NA	0	35859.6	0	0	0	0	0	0	0	0	0	0	0	0	0	0	0	35859.6	NA	0	35859.6	0	0	0	0	0	0	14298.3	0	0
MEX	CHP.and.heat.plants	2001	0	0	0	0	0	0	0	0	0	0	0	0	0	0	0	37893.6	NA	0	37893.6	0	0	0	0	0	0	0	0	0	0	0	0	0	0	0	37893.6	NA	0	37893.6	0	0	0	0	0	0	15109.3	0	0
MEX	CHP.and.heat.plants	2002	0	0	0	0	0	0	0	0	0	0	0	0	0	0	0	39074.4	NA	0	39074.4	0	0	0	0	0	0	0	0	0	0	0	0	0	0	0	39074.4	NA	0	39074.4	0	0	0	0	0	0	15580.1	0	0
MEX	CHP.and.heat.plants	2003	0	0	0	0	0	0	0	0	0	0	0	0	0	0	0	35553.6	NA	0	35553.6	0	0	0	0	0	0	0	0	0	0	0	0	0	0	0	35553.6	NA	0	35553.6	0	0	0	0	0	0	14176.3	0	0
MEX	CHP.and.heat.plants	2004	0	0	0	0	0	0	0	0	0	0	0	0	0	0	0	43185.6	NA	0	43185.6	0	0	0	0	0	0	0	0	0	0	0	0	0	0	0	43185.6	NA	0	43185.6	0	0	0	0	0	0	17219.3	0	0
MEX	CHP.and.heat.plants	2005	0	0	0	0	0	0	0	0	0	0	0	0	0	0	0	43999.2	NA	0	43999.2	0	0	0	0	0	0	0	0	0	0	0	0	0	0	0	43999.2	NA	0	43999.2	0	0	0	0	0	0	17543.7	0	0
MEX	CHP.and.heat.plants	2006	0	0	0	0	0	0	0	0	0	0	0	0	0	0	0	40672.8	NA	0	40672.8	0	0	0	0	0	0	0	0	0	0	0	0	0	0	0	40672.8	NA	0	40672.8	0	0	0	0	0	0	16217.4	0	0
MEX	CHP.and.heat.plants	2007	0	0	0	0	0	0	0	0	0	0	0	0	0	0	0	40676.4	NA	0	40676.4	0	0	0	0	0	0	0	0	0	0	0	0	0	0	0	40676.4	NA	0	40676.4	0	0	0	0	0	0	16218.8	0	0
MEX	CHP.and.heat.plants	2008	0	0	0	0	0	0	0	0	0	0	0	0	0	0	0	36720	NA	0	36720	0	0	0	0	0	0	0	0	0	0	0	0	0	0	0	36720	NA	0	36720	0	0	0	0	0	0	14641.3	0	0
MEX	CHP.and.heat.plants	2009	0	0	0	0	0	0	0	0	0	0	0	0	0	0	0	39607.2	NA	0	39607.2	0	0	0	0	0	0	0	0	0	0	0	0	0	0	0	39607.2	NA	0	39607.2	0	0	0	0	0	0	15792.5	0	0
MEX	Non.specified.energy	1971	0	0	0	0	0	0	0	0	0	0	0	0	0	0	0	0	NA	0	0	0	0	0	0	0	0	0	0	0	0	0	0	0	0	0	0	NA	0	0	0	0	0	0	0	0	0	0	0
MEX	Non.specified.energy	1972	0	0	0	0	0	0	0	0	0	0	0	0	0	0	0	0	NA	0	0	0	0	0	0	0	0	0	0	0	0	0	0	0	0	0	0	NA	0	0	0	0	0	0	0	0	0	0	0
MEX	Non.specified.energy	1973	0	0	0	0	0	0	0	0	0	0	0	0	0	0	0	0	NA	0	0	0	0	0	0	0	0	0	0	0	0	0	0	0	0	0	0	NA	0	0	0	0	0	0	0	0	0	0	0
MEX	Non.specified.energy	1974	0	0	0	0	0	0	0	0	0	0	0	0	0	0	0	0	NA	0	0	0	0	0	0	0	0	0	0	0	0	0	0	0	0	0	0	NA	0	0	0	0	0	0	0	0	0	0	0
MEX	Non.specified.energy	1975	0	0	0	0	0	0	0	0	0	0	0	0	0	0	0	0	NA	0	0	0	0	0	0	0	0	0	0	0	0	0	0	0	0	0	0	NA	0	0	0	0	0	0	0	0	0	0	0
MEX	Non.specified.energy	1976	0	0	0	0	0	0	0	0	0	0	0	0	0	0	0	0	NA	0	0	0	0	0	0	0	0	0	0	0	0	0	0	0	0	0	0	NA	0	0	0	0	0	0	0	0	0	0	0
MEX	Non.specified.energy	1977	0	0	0	0	0	0	0	0	0	0	0	0	0	0	0	0	NA	0	0	0	0	0	0	0	0	0	0	0	0	0	0	0	0	0	0	NA	0	0	0	0	0	0	0	0	0	0	0
MEX	Non.specified.energy	1978	0	0	0	0	0	0	0	0	0	0	0	0	0	0	0	0	NA	0	0	0	0	0	0	0	0	0	0	0	0	0	0	0	0	0	0	NA	0	0	0	0	0	0	0	0	0	0	0
MEX	Non.specified.energy	1979	0	0	0	0	0	0	0	0	0	0	0	0	0	0	0	0	NA	0	0	0	0	0	0	0	0	0	0	0	0	0	0	0	0	0	0	NA	0	0	0	0	0	0	0	0	0	0	0
MEX	Non.specified.energy	1980	0	0	0	0	0	0	0	0	0	0	0	0	0	0	0	0	NA	0	0	0	0	0	0	0	0	0	0	0	0	0	0	0	0	0	0	NA	0	0	0	0	0	0	0	0	0	0	0
MEX	Non.specified.energy	1981	0	0	0	0	0	0	0	0	0	0	0	0	0	0	0	0	NA	0	0	0	0	0	0	0	0	0	0	0	0	0	0	0	0	0	0	NA	0	0	0	0	0	0	0	0	0	0	0
MEX	Non.specified.energy	1982	0	0	0	0	0	0	0	0	0	0	0	0	0	0	0	0	NA	0	0	0	0	0	0	0	0	0	0	0	0	0	0	0	0	0	0	NA	0	0	0	0	0	0	0	0	0	0	0
MEX	Non.specified.energy	1983	0	0	0	0	0	0	0	0	0	0	0	0	0	0	0	0	NA	0	0	0	0	0	0	0	0	0	0	0	0	0	0	0	0	0	0	NA	0	0	0	0	0	0	0	0	0	0	0
MEX	Non.specified.energy	1984	0	0	0	0	0	0	0	0	0	0	0	0	0	0	0	0	NA	0	0	0	0	0	0	0	0	0	0	0	0	0	0	0	0	0	0	NA	0	0	0	0	0	0	0	0	0	0	0
MEX	Non.specified.energy	1985	0	0	0	0	0	0	0	0	0	0	0	0	0	0	0	0	NA	0	0	0	0	0	0	0	0	0	0	0	0	0	0	0	0	0	0	NA	0	0	0	0	0	0	0	0	0	0	0
MEX	Non.specified.energy	1986	0	0	0	0	0	0	0	0	0	0	0	0	0	0	0	0	NA	0	0	0	0	0	0	0	0	0	0	0	0	0	0	0	0	0	0	NA	0	0	0	0	0	0	0	0	0	0	0
MEX	Non.specified.energy	1987	0	0	0	0	0	0	0	0	0	0	0	0	0	0	0	0	NA	0	0	0	0	0	0	0	0	0	0	0	0	0	0	0	0	0	0	NA	0	0	0	0	0	0	0	0	0	0	0
MEX	Non.specified.energy	1988	0	0	0	0	0	0	0	0	0	0	0	0	0	0	0	0	NA	0	0	0	0	0	0	0	0	0	0	0	0	0	0	0	0	0	0	NA	0	0	0	0	0	0	0	0	0	0	0
MEX	Non.specified.energy	1989	0	0	0	0	0	0	0	0	0	0	0	0	0	0	0	0	NA	0	0	0	0	0	0	0	0	0	0	0	0	0	0	0	0	0	0	NA	0	0	0	0	0	0	0	0	0	0	0
MEX	Non.specified.energy	1990	0	0	0	0	0	0	0	0	0	0	0	0	0	0	0	0	NA	0	0	0	0	0	0	0	0	0	0	0	0	0	0	0	0	0	0	NA	0	0	0	0	0	0	0	0	0	0	0
MEX	Non.specified.energy	1991	0	0	0	0	0	0	0	0	0	0	0	0	0	0	0	11329.2	NA	0	11329.2	0	0	0	0	0	0	0	0	0	0	0	0	0	0	0	11329.2	NA	0	11329.2	0	0	0	0	0	0	4978.74	0	0
MEX	Non.specified.energy	1992	0	0	0	0	0	0	0	0	0	0	0	0	0	0	0	12200.4	NA	0	12200.4	0	0	0	0	0	0	0	0	0	0	0	0	0	0	0	12200.4	NA	0	12200.4	0	0	0	0	0	0	5303.41	0	0
MEX	Non.specified.energy	1993	0	0	0	0	0	0	0	0	0	0	0	0	0	0	0	12488.4	NA	0	12488.4	0	0	0	0	0	0	0	0	0	0	0	0	0	0	0	12488.4	NA	0	12488.4	0	0	0	0	0	0	5369.83	0	0
MEX	Non.specified.energy	1994	0	0	0	0	0	0	0	0	0	0	0	0	0	0	0	12852	NA	0	12852	0	0	0	0	0	0	0	0	0	0	0	0	0	0	0	12852	NA	0	12852	0	0	0	0	0	0	5466.5	0	0
MEX	Non.specified.energy	1995	0	0	0	0	0	0	0	0	0	0	0	0	0	0	0	11322	NA	0	11322	0	0	0	0	0	0	0	0	0	0	0	0	0	0	0	11322	NA	0	11322	0	0	0	0	0	0	4763.86	0	0
MEX	Non.specified.energy	1996	0	0	0	0	0	0	0	0	0	0	0	0	0	0	0	11584.8	NA	0	11584.8	0	0	0	0	0	0	0	0	0	0	0	0	0	0	0	11584.8	NA	0	11584.8	0	0	0	0	0	0	4822.06	0	0
MEX	Non.specified.energy	1997	0	0	0	0	0	0	0	0	0	0	0	0	0	0	0	19407.6	NA	0	19407.6	0	0	0	0	0	0	0	0	0	0	0	0	0	0	0	19407.6	NA	0	19407.6	0	0	0	0	0	0	7991.61	0	0
MEX	Non.specified.energy	1998	0	0	0	0	0	0	0	0	0	0	0	0	0	0	0	13330.8	NA	0	13330.8	0	0	0	0	0	0	0	0	0	0	0	0	0	0	0	13330.8	NA	0	13330.8	0	0	0	0	0	0	5430.6	0	0
MEX	Non.specified.energy	1999	0	0	0	0	0	41.868	0	0	0	0	0	41.868	0	0	0	14648.4	NA	0	14690.3	0	0	0	0	0	44.3801	0	0	0	0	0	44.3801	0	0	0	14648.4	NA	0	14692.8	0	0	0	0	0	0	5903.65	0	0
MEX	Non.specified.energy	2000	0	0	0	0	0	0	0	0	0	0	0	0	0	0	0	0	NA	0	0	0	0	0	0	0	0	0	0	0	0	0	0	0	0	0	0	NA	0	0	0	0	0	0	0	0	0	0	0
MEX	Non.specified.energy	2001	0	0	0	0	0	0	0	0	0	0	0	0	0	0	0	0	NA	0	0	0	0	0	0	0	0	0	0	0	0	0	0	0	0	0	0	NA	0	0	0	0	0	0	0	0	0	0	0
MEX	Non.specified.energy	2002	0	0	0	0	0	0	0	0	0	0	0	0	0	0	0	0	NA	0	0	0	0	0	0	0	0	0	0	0	0	0	0	0	0	0	0	NA	0	0	0	0	0	0	0	0	0	0	0
MEX	Non.specified.energy	2003	0	0	0	0	0	0	0	0	0	0	0	0	0	0	0	0	NA	0	0	0	0	0	0	0	0	0	0	0	0	0	0	0	0	0	0	NA	0	0	0	0	0	0	0	0	0	0	0
MEX	Non.specified.energy	2004	0	0	0	0	0	0	0	0	0	0	0	0	0	0	0	0	NA	0	0	0	0	0	0	0	0	0	0	0	0	0	0	0	0	0	0	NA	0	0	0	0	0	0	0	0	0	0	0
MEX	Non.specified.energy	2005	0	0	0	0	0	0	0	0	0	0	0	0	0	0	0	0	NA	0	0	0	0	0	0	0	0	0	0	0	0	0	0	0	0	0	0	NA	0	0	0	0	0	0	0	0	0	0	0
MEX	Non.specified.energy	2006	0	0	0	0	0	0	0	0	0	0	0	0	0	0	0	0	NA	0	0	0	0	0	0	0	0	0	0	0	0	0	0	0	0	0	0	NA	0	0	0	0	0	0	0	0	0	0	0
MEX	Non.specified.energy	2007	0	0	0	0	0	0	0	0	0	0	0	0	0	0	0	0	NA	0	0	0	0	0	0	0	0	0	0	0	0	0	0	0	0	0	0	NA	0	0	0	0	0	0	0	0	0	0	0
MEX	Non.specified.energy	2008	0	0	0	0	0	0	0	0	0	0	0	0	0	0	0	0	NA	0	0	0	0	0	0	0	0	0	0	0	0	0	0	0	0	0	0	NA	0	0	0	0	0	0	0	0	0	0	0
MEX	Non.specified.energy	2009	0	0	0	0	0	0	0	0	0	0	0	0	0	0	0	0	NA	0	0	0	0	0	0	0	0	0	0	0	0	0	0	0	0	0	0	NA	0	0	0	0	0	0	0	0	0	0	0
MEX	Other	1971	0	0	66402.6	0	0	53884.1	21101.5	14486.3	0	0	0	155875	0	13983	199083	38534.4	NA	0	407475	0	0	70386.8	0	0	57117.2	22367.6	15355.5	0	0	0	165227	0	14542.3	220982	38534.4	NA	0	439286	0	0	0	22367.6	0	0	20045.3	0	0
MEX	Other	1972	0	0	70254.5	0	0	54386.5	24785.9	16579.7	0	0	0	166007	0	15931	201745	43023.6	NA	0	426706	0	0	74469.8	0	0	57649.7	26273	17574.5	0	0	0	175967	0	16568.2	223937	43023.6	NA	0	459496	0	0	0	26273	0	0	22080.5	0	0
MEX	Other	1973	0	0	75194.9	0	0	54847.1	26418.7	18547.5	0	0	0	175008	0	18121	204441	47199.6	NA	0	444770	0	0	79706.6	0	0	58137.9	28003.8	19660.4	0	0	0	185509	0	18845.8	226929	47199.6	NA	0	478483	0	0	0	28003.8	0	0	24122.4	0	0
MEX	Other	1974	0	0	73394.6	0	0	56940.5	34917.9	17752	0	0	0	183005	0	18527	207177	56228.4	NA	0	464938	0	0	77798.3	0	0	60356.9	37013	18817.2	0	0	0	193985	0	19268.1	229967	56228.4	NA	0	499448	0	0	0	37013	0	0	29196.2	0	0
MEX	Other	1975	0	0	94203	0	0	59955	46054.8	18673.1	0	0	0	218886	0	17388	209956	60148.8	NA	0	506378	0	0	99855.2	0	0	63552.3	48818.1	19793.5	0	0	0	232019	0	18083.5	233051	60148.8	NA	0	543302	0	0	0	48818.1	0	0	30874.1	0	0
MEX	Other	1976	0	0	100065	0	0	60373.7	49822.9	19301.1	0	0	0	229562	0	19456	212784	64213.2	NA	0	526016	0	0	106068	0	0	63996.1	52812.3	20459.2	0	0	0	243336	0	20234.2	236190	64213.2	NA	0	563974	0	0	0	52812.3	0	0	32535.7	0	0
MEX	Other	1977	0	0	99813.3	0	0	64141.8	50534.7	19636.1	0	0	0	234126	0	17501	215648	70570.8	NA	0	537845	0	0	105802	0	0	67990.3	53566.8	20814.3	0	0	0	248173	0	18201	239369	70570.8	NA	0	576314	0	0	0	53566.8	0	0	35786.4	0	0
MEX	Other	1978	0	0	107475	0	0	62969.5	56354.3	21185.2	0	0	0	247984	0	19548	218556	78890.4	NA	0	564979	0	0	113924	0	0	66747.6	59735.6	22456.3	0	0	0	262863	0	20329.9	242597	78890.4	NA	0	604681	0	0	0	59735.6	0	0	39987.3	0	0
MEX	Other	1979	0	0	112332	0	0	66612	60373.7	23655.4	0	0	0	262973	0	21416	221509	85230	NA	0	591128	0	0	119072	0	0	70608.7	63996.1	25074.7	0	0	0	278751	0	22272.6	245875	85230	NA	0	632129	0	0	0	63996.1	0	0	42569.7	0	0
MEX	Other	1980	0	0	144654	0	0	70882.5	64267.4	25581.3	0	0	0	305385	0	21876	223372	95454	NA	0	646087	0	0	153333	0	0	75135.5	68123.4	27116.2	0	0	0	323708	0	22751	247943	95454	NA	0	689856	0	0	0	68123.4	0	0	48071.3	0	0
MEX	Other	1981	0	0	152023	0	0	69291.5	68956.6	27716.6	0	0	0	317987	0	21022	224399	102827	NA	0	666235	0	0	161144	0	0	73449	73094	29379.6	0	0	0	337067	0	21862.9	249083	102827	NA	0	710839	0	0	0	73094	0	0	52329.5	0	0
MEX	Other	1982	0	0	170403	0	0	68831	76157.9	27256.1	0	0	0	342648	0	23220	225436	118397	NA	0	709700	0	0	180627	0	0	72960.9	80727.4	28891.4	0	0	0	363207	0	24148.8	250234	118397	NA	0	755986	0	0	0	80727.4	0	0	61381.2	0	0
MEX	Other	1983	0	0	176013	0	0	52837.4	68203	27967.8	0	0	0	325021	0	20519	226480	117709	NA	0	689730	0	0	186574	0	0	56007.7	72295.2	29645.9	0	0	0	344523	0	21339.8	251393	117709	NA	0	734965	0	0	0	72295.2	0	0	61790.8	0	0
MEX	Other	1984	0	0	192049	0	0	47101.5	57024.2	32154.6	0	0	0	328329	0	28679	227538	121561	NA	0	706107	0	0	203571	0	0	49927.6	60445.7	34083.9	0	0	0	348029	0	29826.2	252567	121561	NA	0	751983	0	0	0	60445.7	0	0	64666	0	0
MEX	Other	1985	0	0	200966	0	0	38267.4	58070.9	43584.6	0	0	0	340889	0	29462	228603	129247	NA	0	728202	0	0	213024	0	0	40563.4	61555.2	46199.7	0	0	0	361343	0	30640.5	253749	129247	NA	0	774980	0	0	0	61555.2	0	0	69657.4	0	0
MEX	Other	1986	0	0	200506	0	0	36048.3	58908.3	36843.8	0	0	0	332306	0	32991	229677	134093	NA	0	729067	0	0	212536	0	0	38211.2	62442.8	39054.5	0	0	0	352245	0	34310.6	254941	134093	NA	0	775589	0	0	0	62442.8	0	0	72547.5	0	0
MEX	Other	1987	0	0	207916	0	0	40277	59033.9	45133.7	0	0	0	352361	0	31890	230762	139468	NA	0	754480	0	0	220391	0	0	42693.6	62575.9	47841.7	0	0	0	373503	0	33165.6	256145	139468	NA	0	802281	0	0	0	62575.9	0	0	75817	0	0
MEX	Other	1988	0	0	213485	0	0	38016.1	62299.6	42831	0	0	0	356632	0	33482	231858	145595	NA	0	767567	0	0	226294	0	0	40297.1	66037.6	45400.8	0	0	0	378030	0	34821.3	257363	145595	NA	0	815808	0	0	0	66037.6	0	0	79496.5	0	0
MEX	Other	1989	0	0	222863	0	0	28260.9	58531.5	37220.7	0	0	0	346876	0	36019	232963	155545	NA	0	771404	0	0	236235	0	0	29956.6	62043.4	39453.9	0	0	0	367689	0	37459.8	258589	155545	NA	0	819283	0	0	0	62043.4	0	0	84580.3	0	0
MEX	Other	1990	0	0	255520	0	0	15365.6	61671.6	0	0	0	0	332558	0	37690	276409	165586	NA	692.88	812935	0	0	270852	0	0	16287.5	65371.9	0	0	0	0	352511	0	39197.6	306814	165586	NA	692.88	864801	0	0	0	65371.9	0	0	92183.3	0	0
MEX	Other	1991	0	0	269588	0	0	11974.2	65690.9	0	0	0	0	347253	0	40364	278641	150412	NA	740.85	817411	0	0	285763	0	0	12692.7	69632.3	0	0	0	0	368088	0	41978.6	309292	150412	NA	740.85	870511	0	0	0	69632.3	0	0	79782.2	0	0
MEX	Other	1992	0	0	293788	0	0	11220.6	67868	0	0	0	0	372876	0	41630	289033	157918	NA	803.82	862261	0	0	311415	0	0	11893.9	71940.1	0	0	0	0	395249	0	43295.2	320827	157918	NA	803.82	918093	0	0	0	71940.1	0	0	84283.3	0	0
MEX	Other	1993	0	0	311037	0	0	7117.56	69040.3	0	0	0	0	387195	0	33960	277752	166216	NA	906.82	866029	0	0	329700	0	0	7544.61	73182.8	0	0	0	0	410427	0	35318.4	308304	166216	NA	906.82	921172	0	0	0	73182.8	0	0	88438.8	0	0
MEX	Other	1994	0	0	328915	0	0	6615.14	65858.4	0	0	0	0	401389	0	32489	278542	178132	NA	1002.82	891554	0	0	348650	0	0	7012.05	69809.9	0	0	0	0	425472	0	33788.6	309182	178132	NA	1002.82	947577	0	0	0	69809.9	0	0	93898.1	0	0
MEX	Other	1995	0	0	329710	0	0	6991.96	66821.3	0	0	0	0	403524	0	32355	279283	180306	NA	1010.82	896479	0	0	349493	0	0	7411.47	70830.6	0	0	0	0	427735	0	33649.2	310005	180306	NA	1010.82	952706	0	0	0	70830.6	0	0	94473.9	0	0
MEX	Other	1996	0	0	323849	0	0	8373.6	71845.5	0	0	0	0	404068	0	34639	280154	181663	NA	1105.82	901630	0	0	343280	0	0	8876.02	76156.2	0	0	0	0	428312	0	36024.6	310971	181663	NA	1105.82	958077	0	0	0	76156.2	0	0	94299.3	0	0
MEX	Other	1997	0	0	321881	0	0	5568.44	77120.9	0	0	0	0	404570	0	33620	281127	188194	NA	1217.78	908729	0	0	341194	0	0	5902.55	81748.1	0	0	0	0	428845	0	34964.8	312051	188194	NA	1217.78	965272	0	0	0	81748.1	0	0	97678.5	0	0
MEX	Other	1998	0	0	337289	0	0	1507.25	82019.4	0	0	0	0	420815	0	31194	282274	198439	NA	1368.75	934091	0	0	357526	0	0	1597.68	86940.6	0	0	0	0	446064	0	32441.8	313324	198439	NA	1368.75	991638	0	0	0	86940.6	0	0	102795	0	0
MEX	Other	1999	0	0	311247	0	0	1465.38	84364	0	0	0	0	397076	0	31227	283536	207947	NA	1530.7	921317	0	0	329922	0	0	1553.3	89425.9	0	0	0	0	420901	0	32476.1	314726	207947	NA	1530.7	977580	0	0	0	89425.9	0	0	107576	0	0
MEX	Other	2000	0	0	350016	0	0	1297.91	84280.3	0	0	0	0	435595	0	32089	284921	221735	NA	1736.64	976076	0	0	371017	0	0	1375.78	89337.1	0	0	0	0	461730	0	33372.6	316263	221735	NA	1736.64	1.03484e+06	0	0	0	89337.1	0	0	114614	0	0
MEX	Other	2001	0	0	343485	0	0	1507.25	81684.5	0	0	0	0	426677	0	34726	267043	230209	NA	2081.59	960736	0	0	364094	0	0	1597.68	86585.5	0	0	0	0	452277	0	36115	296417	230209	NA	2081.59	1.0171e+06	0	0	0	86585.5	0	0	118729	0	0
MEX	Other	2002	0	0	343276	0	0	1549.12	79381.7	0	0	0	0	424207	0	38279	266188	233467	NA	2315.55	964456	0	0	363872	0	0	1642.06	84144.6	0	0	0	0	449659	0	39810.2	295468	233467	NA	2315.55	1.02072e+06	0	0	0	84144.6	0	0	120621	0	0
MEX	Other	2003	0	0	325817	0	0	1256.04	84950.2	0	0	0	0	412023	0	40243	266977	260816	NA	2662.47	982722	0	0	345366	0	0	1331.4	90047.2	0	0	0	0	436744	0	41852.7	296344	260816	NA	2662.47	1.03842e+06	0	0	0	90047.2	0	0	140605	0	0
MEX	Other	2004	0	0	332306	0	0	1381.64	89974.3	0	0	0	0	423662	0	41819	266601	276779	NA	2956.42	1.01182e+06	0	0	352245	0	0	1464.54	95372.8	0	0	0	0	449082	0	43491.8	295927	276779	NA	2956.42	1.06824e+06	0	0	0	95372.8	0	0	152259	0	0
MEX	Other	2005	0	0	314722	0	0	1507.25	95249.7	0	0	0	0	411479	0	42288	266383	293695	NA	3375.35	1.01722e+06	0	0	333605	0	0	1597.68	100965	0	0	0	0	436167	0	43979.5	295685	293695	NA	3375.35	1.0729e+06	0	0	0	100965	0	0	161712	0	0
MEX	Other	2006	0	0	317820	0	0	1884.06	102870	0	0	0	0	422574	0	42997	264549	299282	NA	3763.26	1.03317e+06	0	0	336889	0	0	1997.1	109042	0	0	0	0	447928	0	44716.9	293650	299282	NA	3763.26	1.08934e+06	0	0	0	109042	0	0	163598	0	0
MEX	Other	2007	0	0	309614	0	0	1758.46	108061	0	0	0	0	419434	0	44152	263187	310093	NA	4344.14	1.04121e+06	0	0	328191	0	0	1863.96	114545	0	0	0	0	444600	0	45918.1	292138	310093	NA	4344.14	1.09709e+06	0	0	0	114545	0	0	170316	0	0
MEX	Other	2008	0	0	304464	0	0	837.36	111788	0	0	0	0	417089	0	44221	261999	319176	NA	5354.96	1.04784e+06	0	0	322732	0	0	887.602	118495	0	0	0	0	442114	0	45989.8	290818	319176	NA	5354.96	1.10345e+06	0	0	0	118495	0	0	174848	0	0
MEX	Other	2009	0	0	292825	0	0	837.36	114300	0	0	0	0	407962	0	41665	260628	331117	NA	6437.75	1.04781e+06	0	0	310394	0	0	887.602	121158	0	0	0	0	432439	0	43331.6	289297	331117	NA	6437.75	1.10262e+06	0	0	0	121158	0	0	180380	0	0
MEX	Residential	1971	0	0	58782.7	0	0	30145	0	0	0	0	0	88927.6	0	13983	199083	14328	NA	0	316321	0	0	62309.6	0	0	31953.7	0	0	0	0	0	94263.3	0	14542.3	220982	14328	NA	0	344115	0	0	0	0	0	0	4969.47	0	0
MEX	Residential	1972	0	0	62174	0	0	31191.7	0	0	0	0	0	93365.6	0	15931	201745	15991	NA	0	327033	0	0	65904.4	0	0	33063.2	0	0	0	0	0	98967.6	0	16568.2	223937	15991	NA	0	355464	0	0	0	0	0	0	5401.85	0	0
MEX	Residential	1973	0	0	66528.3	0	0	31233.5	0	0	0	0	0	97761.8	0	18121	204441	17795	NA	0	338118	0	0	70519.9	0	0	33107.5	0	0	0	0	0	103627	0	18845.8	226929	17795	NA	0	367197	0	0	0	0	0	0	5890.68	0	0
MEX	Residential	1974	0	0	64979.1	0	0	32908.2	0	0	0	0	0	97887.4	0	18527	207177	19832.4	NA	0	343424	0	0	68877.9	0	0	34882.7	0	0	0	0	0	103761	0	19268.1	229967	19832.4	NA	0	372828	0	0	0	0	0	0	6463.81	0	0
MEX	Residential	1975	0	0	83401.1	0	0	35252.9	0	0	0	0	0	118654	0	17388	209956	21801.6	NA	0	367799	0	0	88405.1	0	0	37368	0	0	0	0	0	125773	0	18083.5	233051	21801.6	NA	0	398709	0	0	0	0	0	0	7021.81	0	0
MEX	Residential	1976	0	0	88592.7	0	0	35880.9	0	0	0	0	0	124474	0	19456	212784	24141.6	NA	0	380855	0	0	93908.2	0	0	38033.7	0	0	0	0	0	131942	0	20234.2	236190	24141.6	NA	0	412508	0	0	0	0	0	0	7706.36	0	0
MEX	Residential	1977	0	0	88341.5	0	0	38183.6	0	0	0	0	0	126525	0	17501	215648	26503.2	NA	0	386177	0	0	93642	0	0	40474.6	0	0	0	0	0	134117	0	18201	239369	26503.2	NA	0	418190	0	0	0	0	0	0	8404.93	0	0
MEX	Residential	1978	0	0	95166	0	0	37848.7	0	0	0	0	0	133015	0	19548	218556	29768.4	NA	0	400887	0	0	100876	0	0	40119.6	0	0	0	0	0	140996	0	20329.9	242597	29768.4	NA	0	433691	0	0	0	0	0	0	9396.88	0	0
MEX	Residential	1979	0	0	99478.4	0	0	39523.4	0	0	0	0	0	139002	0	21416	221509	33156	NA	0	415083	0	0	105447	0	0	41894.8	0	0	0	0	0	147342	0	22272.6	245875	33156	NA	0	448646	0	0	0	0	0	0	10434.6	0	0
MEX	Residential	1980	0	0	128074	0	0	41407.5	0	0	0	0	0	169482	0	21876	223372	36136.8	NA	0	450867	0	0	135759	0	0	43891.9	0	0	0	0	0	179651	0	22751	247943	36136.8	NA	0	486481	0	0	0	0	0	0	11353.3	0	0
MEX	Residential	1981	0	0	134606	0	0	41365.6	0	0	0	0	0	175971	0	21022	224399	40359.6	NA	0	461752	0	0	142682	0	0	43847.5	0	0	0	0	0	186529	0	21862.9	249083	40359.6	NA	0	497835	0	0	0	0	0	0	13505.7	0	0
MEX	Residential	1982	0	0	150809	0	0	41574.9	0	0	0	0	0	192383	0	23220	225436	45039.6	NA	0	486079	0	0	159857	0	0	44069.4	0	0	0	0	0	203926	0	24148.8	250234	45039.6	NA	0	523348	0	0	0	0	0	0	15931	0	0
MEX	Residential	1983	0	0	155707	0	0	32531.4	0	0	0	0	0	188239	0	20519	226480	46724.4	NA	0	481962	0	0	165050	0	0	34483.3	0	0	0	0	0	199533	0	21339.8	251393	46724.4	NA	0	518990	0	0	0	0	0	0	17360.9	0	0
MEX	Residential	1984	0	0	169942	0	0	29977.5	0	0	0	0	0	199920	0	28679	227538	48279.6	NA	0	504417	0	0	180139	0	0	31776.1	0	0	0	0	0	211915	0	29826.2	252567	48279.6	NA	0	542588	0	0	0	0	0	0	18747.3	0	0
MEX	Residential	1985	0	0	177897	0	0	20640.9	0	0	0	0	0	198538	0	29462	228603	51426	NA	0	508029	0	0	188571	0	0	21879.4	0	0	0	0	0	210450	0	30640.5	253749	51426	NA	0	546266	0	0	0	0	0	0	20779.4	0	0
MEX	Residential	1986	0	0	177395	0	0	21645.8	0	0	0	0	0	199040	0	32991	229677	54284.4	NA	0	515993	0	0	188038	0	0	22944.5	0	0	0	0	0	210983	0	34310.6	254941	54284.4	NA	0	554519	0	0	0	0	0	0	22741.4	0	0
MEX	Residential	1987	0	0	181540	0	0	21771.4	0	0	0	0	0	203311	0	31890	230762	56563.2	NA	0	522526	0	0	192432	0	0	23077.6	0	0	0	0	0	215510	0	33165.6	256145	56563.2	NA	0	561384	0	0	0	0	0	0	24491.2	0	0
MEX	Residential	1988	0	0	186271	0	0	19719.8	0	0	0	0	0	205991	0	33482	231858	60570	NA	0	531901	0	0	197447	0	0	20903	0	0	0	0	0	218350	0	34821.3	257363	60570	NA	0	571104	0	0	0	0	0	0	27033.1	0	0
MEX	Residential	1989	0	0	213024	0	0	15700.5	0	0	0	0	0	228725	0	36019	232963	67726.8	NA	0	565434	0	0	225806	0	0	16642.5	0	0	0	0	0	242448	0	37459.8	258589	67726.8	NA	0	606224	0	0	0	0	0	0	31084.3	0	0
MEX	Residential	1990	0	0	235256	0	0	9001.62	0	0	0	0	0	244258	0	37690	276409	73407.6	NA	413.91	632178	0	0	249372	0	0	9541.72	0	0	0	0	0	258913	0	39197.6	306814	73407.6	NA	413.91	678746	0	0	0	0	0	0	34575.6	0	0
MEX	Residential	1991	0	0	233414	0	0	7243.16	0	0	0	0	0	240657	0	40364	278641	79138.8	NA	442.92	639244	0	0	247419	0	0	7677.75	0	0	0	0	0	255097	0	41978.6	309292	79138.8	NA	442.92	685949	0	0	0	0	0	0	36626.1	0	0
MEX	Residential	1992	0	0	251836	0	0	7285.03	0	0	0	0	0	259121	0	41630	289033	86580	NA	479.89	676844	0	0	266946	0	0	7722.13	0	0	0	0	0	274668	0	43295.2	320827	86580	NA	479.89	725851	0	0	0	0	0	0	39409.4	0	0
MEX	Residential	1993	0	0	269504	0	0	3935.59	0	0	0	0	0	273440	0	26595	277752	91836	NA	541.9	670164	0	0	285675	0	0	4171.73	0	0	0	0	0	289846	0	27658.8	308304	91836	NA	541.9	718187	0	0	0	0	0	0	41143.3	0	0
MEX	Residential	1994	0	0	281185	0	0	3642.52	0	0	0	0	0	284828	0	24913	278542	100008	NA	598.88	688890	0	0	298057	0	0	3861.07	0	0	0	0	0	301918	0	25909.5	309182	100008	NA	598.88	737616	0	0	0	0	0	0	44123.9	0	0
MEX	Residential	1995	0	0	280599	0	0	3851.86	0	0	0	0	0	284451	0	24330	279283	102460	NA	603.9	691128	0	0	297435	0	0	4082.97	0	0	0	0	0	301518	0	25303.2	310005	102460	NA	603.9	739889	0	0	0	0	0	0	44537.6	0	0
MEX	Residential	1996	0	0	275575	0	0	4563.61	0	0	0	0	0	280139	0	26090	280154	102535	NA	660.89	689579	0	0	292110	0	0	4837.43	0	0	0	0	0	296947	0	27133.6	310971	102535	NA	660.89	738248	0	0	0	0	0	0	43924.1	0	0
MEX	Residential	1997	0	0	272016	0	0	1884.06	0	0	0	0	0	273900	0	25295	281127	106715	NA	727.88	687765	0	0	288337	0	0	1997.1	0	0	0	0	0	290334	0	26306.8	312051	106715	NA	727.88	736135	0	0	0	0	0	0	45058.2	0	0
MEX	Residential	1998	0	0	284954	0	0	1465.38	0	0	0	0	0	286419	0	23051	282274	114084	NA	817.85	706646	0	0	302051	0	0	1553.3	0	0	0	0	0	303604	0	23973	313324	114084	NA	817.85	755803	0	0	0	0	0	0	47479	0	0
MEX	Residential	1999	0	0	253511	0	0	1423.51	0	0	0	0	0	254934	0	23095	283536	120136	NA	914.82	682616	0	0	268721	0	0	1508.92	0	0	0	0	0	270230	0	24018.8	314726	120136	NA	914.82	730025	0	0	0	0	0	0	49275.5	0	0
MEX	Residential	2000	0	0	281814	0	0	1256.04	0	0	0	0	0	283070	0	24185	284921	130061	NA	1037.78	723274	0	0	298722	0	0	1331.4	0	0	0	0	0	300054	0	25152.4	316263	130061	NA	1037.78	772567	0	0	0	0	0	0	52564.1	0	0
MEX	Residential	2001	0	0	272351	0	0	1465.38	0	0	0	0	0	273817	0	26289	267043	138038	NA	1243.77	706431	0	0	288692	0	0	1553.3	0	0	0	0	0	290246	0	27340.6	296417	138038	NA	1243.77	753286	0	0	0	0	0	0	55786.2	0	0
MEX	Residential	2002	0	0	272100	0	0	1507.25	0	0	0	0	0	273607	0	29096	266188	140515	NA	1383.74	710790	0	0	288426	0	0	1597.68	0	0	0	0	0	290024	0	30259.8	295468	140515	NA	1383.74	757651	0	0	0	0	0	0	56785.1	0	0
MEX	Residential	2003	0	0	280055	0	0	1214.17	0	0	0	0	0	281269	0	32731	266977	143500	NA	1590.69	726067	0	0	296858	0	0	1287.02	0	0	0	0	0	298145	0	34040.2	296344	143500	NA	1590.69	773620	0	0	0	0	0	0	57989.1	0	0
MEX	Residential	2004	0	0	269002	0	0	1339.78	0	0	0	0	0	270342	0	34102	266601	146639	NA	1766.66	719450	0	0	285142	0	0	1420.16	0	0	0	0	0	286562	0	35466.1	295927	146639	NA	1766.66	766361	0	0	0	0	0	0	59255.5	0	0
MEX	Residential	2005	0	0	253678	0	0	1465.38	0	0	0	0	0	255144	0	34189	266383	153112	NA	2016.61	710844	0	0	268899	0	0	1553.3	0	0	0	0	0	270452	0	35556.6	295685	153112	NA	2016.61	756822	0	0	0	0	0	0	61868.9	0	0
MEX	Residential	2006	0	0	253804	0	0	1842.19	0	0	0	0	0	255646	0	33715	264549	160027	NA	2248.56	716186	0	0	269032	0	0	1952.72	0	0	0	0	0	270985	0	35063.6	293650	160027	NA	2248.56	761974	0	0	0	0	0	0	64661	0	0
MEX	Residential	2007	0	0	251082	0	0	1716.59	0	0	0	0	0	252799	0	34676	263187	165006	NA	2595.48	718264	0	0	266147	0	0	1819.58	0	0	0	0	0	267967	0	36063	292138	165006	NA	2595.48	763769	0	0	0	0	0	0	66670.3	0	0
MEX	Residential	2008	0	0	248194	0	0	795.492	0	0	0	0	0	248989	0	34284	261999	170824	NA	3199.39	719295	0	0	263085	0	0	843.222	0	0	0	0	0	263928	0	35655.4	290818	170824	NA	3199.39	764425	0	0	0	0	0	0	69018.4	0	0
MEX	Residential	2009	0	0	238313	0	0	795.492	0	0	0	0	0	239108	0	32105	260628	177167	NA	3846.25	712854	0	0	252611	0	0	843.222	0	0	0	0	0	253455	0	33389.2	289297	177167	NA	3846.25	757154	0	0	0	0	0	0	71578.7	0	0
MEX	Commerce.and.public.services	1971	0	0	7243.16	0	0	0	1842.19	14486.3	0	0	0	23571.7	0	0	0	10504.8	NA	0	34076.5	0	0	7677.75	0	0	0	1952.72	15355.5	0	0	0	24986	0	0	0	10504.8	NA	0	35490.8	0	0	0	1952.72	0	0	7530.01	0	0
MEX	Commerce.and.public.services	1972	0	0	7661.84	0	0	0	2219	16579.7	0	0	0	26460.6	0	0	0	11441	NA	0	37901.6	0	0	8121.55	0	0	0	2352.14	17574.5	0	0	0	28048.2	0	0	0	11441	NA	0	39489.2	0	0	0	2352.14	0	0	8198.19	0	0
MEX	Commerce.and.public.services	1973	0	0	8206.13	0	0	0	2302.74	18547.5	0	0	0	29056.4	0	0	0	13345	NA	0	42401.4	0	0	8698.5	0	0	0	2440.9	19660.4	0	0	0	30799.8	0	0	0	13345	NA	0	44144.8	0	0	0	2440.9	0	0	9559.13	0	0
MEX	Commerce.and.public.services	1974	0	0	7996.79	0	0	0	4647.35	17752	0	0	0	30396.2	0	0	0	18748.8	NA	0	49145	0	0	8476.6	0	0	0	4926.19	18817.2	0	0	0	32219.9	0	0	0	18748.8	NA	0	50968.7	0	0	0	4926.19	0	0	13425.2	0	0
MEX	Commerce.and.public.services	1975	0	0	10257.7	0	0	0	8624.81	18673.1	0	0	0	37555.6	0	0	0	19782	NA	0	57337.6	0	0	10873.1	0	0	0	9142.3	19793.5	0	0	0	39808.9	0	0	0	19782	NA	0	59590.9	0	0	0	9142.3	0	0	14160	0	0
MEX	Commerce.and.public.services	1976	0	0	10885.7	0	0	0	9797.11	19301.1	0	0	0	39983.9	0	0	0	21384	NA	0	61367.9	0	0	11538.8	0	0	0	10384.9	20459.2	0	0	0	42383	0	0	0	21384	NA	0	63767	0	0	0	10384.9	0	0	15301.2	0	0
MEX	Commerce.and.public.services	1977	0	0	10885.7	0	0	0	9420.3	19636.1	0	0	0	39942.1	0	0	0	23158.8	NA	0	63100.9	0	0	11538.8	0	0	0	9985.52	20814.3	0	0	0	42338.6	0	0	0	23158.8	NA	0	65497.4	0	0	0	9985.52	0	0	16565.3	0	0
MEX	Commerce.and.public.services	1978	0	0	11723	0	0	0	10383.3	21185.2	0	0	0	43291.5	0	0	0	24764.4	NA	0	68055.9	0	0	12426.4	0	0	0	11006.3	22456.3	0	0	0	45889	0	0	0	24764.4	NA	0	70653.4	0	0	0	11006.3	0	0	17707.5	0	0
MEX	Commerce.and.public.services	1979	0	0	12225.5	0	0	0	10843.8	23655.4	0	0	0	46724.7	0	0	0	26326.8	NA	0	73051.5	0	0	12959	0	0	0	11494.4	25074.7	0	0	0	49528.2	0	0	0	26326.8	NA	0	75855	0	0	0	11494.4	0	0	18818	0	0
MEX	Commerce.and.public.services	1980	0	0	15784.2	0	0	0	11220.6	25581.3	0	0	0	52586.2	0	0	0	28364.4	NA	0	80950.6	0	0	16731.3	0	0	0	11893.9	27116.2	0	0	0	55741.4	0	0	0	28364.4	NA	0	84105.8	0	0	0	11893.9	0	0	20267.2	0	0
MEX	Commerce.and.public.services	1981	0	0	16579.7	0	0	0	12099.9	27716.6	0	0	0	56396.2	0	0	0	30240	NA	0	86636.2	0	0	17574.5	0	0	0	12825.8	29379.6	0	0	0	59780	0	0	0	30240	NA	0	90020	0	0	0	12825.8	0	0	21656.4	0	0
MEX	Commerce.and.public.services	1982	0	0	18589.4	0	0	0	15868	27256.1	0	0	0	61713.4	0	0	0	32680.8	NA	0	94394.2	0	0	19704.8	0	0	0	16820.1	28891.4	0	0	0	65416.2	0	0	0	32680.8	NA	0	98097	0	0	0	16820.1	0	0	23457.4	0	0
MEX	Commerce.and.public.services	1983	0	0	19175.5	0	0	0	14193.3	27967.8	0	0	0	61336.6	0	0	0	30844.8	NA	0	92181.4	0	0	20326.1	0	0	0	15044.8	29645.9	0	0	0	65016.8	0	0	0	30844.8	NA	0	95861.6	0	0	0	15044.8	0	0	22189.6	0	0
MEX	Commerce.and.public.services	1984	0	0	20934	0	0	0	1088.57	32112.8	0	0	0	54135.3	0	0	0	31100.4	NA	0	85235.7	0	0	22190	0	0	0	1153.88	34039.5	0	0	0	57383.4	0	0	0	31100.4	NA	0	88483.8	0	0	0	1153.88	0	0	22423.9	0	0
MEX	Commerce.and.public.services	1985	0	0	21897	0	0	0	1465.38	43500.9	0	0	0	66863.2	0	0	0	33775.2	NA	0	100638	0	0	23210.8	0	0	0	1553.3	46110.9	0	0	0	70875	0	0	0	33775.2	NA	0	104650	0	0	0	1553.3	0	0	24407.2	0	0
MEX	Commerce.and.public.services	1986	0	0	21855.1	0	0	0	1423.51	36760.1	0	0	0	60038.7	0	0	0	33746.4	NA	0	93785.1	0	0	23166.4	0	0	0	1508.92	38965.7	0	0	0	63641	0	0	0	33746.4	NA	0	97387.4	0	0	0	1508.92	0	0	24441.1	0	0
MEX	Commerce.and.public.services	1987	0	0	25078.9	0	0	0	1088.57	45133.7	0	0	0	71301.2	0	0	0	34866	NA	0	106167	0	0	26583.7	0	0	0	1153.88	47841.7	0	0	0	75579.3	0	0	0	34866	NA	0	110445	0	0	0	1153.88	0	0	25308.5	0	0
MEX	Commerce.and.public.services	1988	0	0	25916.3	0	0	0	1088.57	42831	0	0	0	69835.8	0	0	0	34664.4	NA	0	104500	0	0	27471.3	0	0	0	1153.88	45400.8	0	0	0	74026	0	0	0	34664.4	NA	0	108690	0	0	0	1153.88	0	0	25218.4	0	0
MEX	Commerce.and.public.services	1989	0	0	8499.2	0	0	0	1214.17	37220.7	0	0	0	46934	0	0	0	35636.4	NA	0	82570.4	0	0	9009.16	0	0	0	1287.02	39453.9	0	0	0	49750.1	0	0	0	35636.4	NA	0	85386.5	0	0	0	1287.02	0	0	25983.3	0	0
MEX	Commerce.and.public.services	1990	0	0	18840.6	0	0	0	1297.91	0	0	0	0	20138.5	0	0	0	39124.8	NA	278.97	59542.3	0	0	19971	0	0	0	1375.78	0	0	0	0	21346.8	0	0	0	39124.8	NA	278.97	60750.6	0	0	0	1375.78	0	0	28590.3	0	0
MEX	Commerce.and.public.services	1991	0	0	34666.7	0	0	0	1381.64	0	0	0	0	36048.3	0	0	0	47883.6	NA	297.93	84229.9	0	0	36746.7	0	0	0	1464.54	0	0	0	0	38211.2	0	0	0	47883.6	NA	297.93	86392.8	0	0	0	1464.54	0	0	35210.1	0	0
MEX	Commerce.and.public.services	1992	0	0	40988.8	0	0	0	1674.72	0	0	0	0	42663.5	0	0	0	50918.4	NA	323.93	93905.8	0	0	43448.1	0	0	0	1775.2	0	0	0	0	45223.3	0	0	0	50918.4	NA	323.93	96465.6	0	0	0	1775.2	0	0	37674.9	0	0
MEX	Commerce.and.public.services	1993	0	0	40528.2	0	0	0	1674.72	0	0	0	0	42202.9	0	7365	0	53067.6	NA	364.92	103000	0	0	42959.9	0	0	0	1775.2	0	0	0	0	44735.1	0	7659.6	0	53067.6	NA	364.92	105827	0	0	0	1775.2	0	0	39508.3	0	0
MEX	Commerce.and.public.services	1994	0	0	46682.8	0	0	0	2470.21	0	0	0	0	49153	0	7576	0	54540	NA	403.94	111673	0	0	49483.8	0	0	0	2618.42	0	0	0	0	52102.2	0	7879.04	0	54540	NA	403.94	114925	0	0	0	2618.42	0	0	40854.3	0	0
MEX	Commerce.and.public.services	1995	0	0	48064.5	0	0	0	1590.98	0	0	0	0	49655.4	0	8025	0	53762.4	NA	406.92	111850	0	0	50948.3	0	0	0	1686.44	0	0	0	0	52634.8	0	8346	0	53762.4	NA	406.92	115150	0	0	0	1686.44	0	0	40518.2	0	0
MEX	Commerce.and.public.services	1996	0	0	47227.1	0	0	0	1716.59	0	0	0	0	48943.7	0	8549	0	51973.2	NA	444.93	109911	0	0	50060.7	0	0	0	1819.58	0	0	0	0	51880.3	0	8890.96	0	51973.2	NA	444.93	113189	0	0	0	1819.58	0	0	39407.8	0	0
MEX	Commerce.and.public.services	1997	0	0	48860	0	0	0	1842.19	0	0	0	0	50702.1	0	8325	0	53935.2	NA	489.9	113452	0	0	51791.6	0	0	0	1952.72	0	0	0	0	53744.3	0	8658	0	53935.2	NA	489.9	116827	0	0	0	1952.72	0	0	41142.6	0	0
MEX	Commerce.and.public.services	1998	0	0	51204.6	0	0	0	3475.04	0	0	0	0	54679.6	0	8143	0	56480.4	NA	550.9	119854	0	0	54276.8	0	0	0	3683.55	0	0	0	0	57960.4	0	8468.72	0	56480.4	NA	550.9	123460	0	0	0	3683.55	0	0	43342.9	0	0
MEX	Commerce.and.public.services	1999	0	0	50241.6	0	0	0	3600.65	0	0	0	0	53842.2	0	8132	0	59025.6	NA	615.88	121616	0	0	53256.1	0	0	0	3816.69	0	0	0	0	57072.8	0	8457.28	0	59025.6	NA	615.88	125172	0	0	0	3816.69	0	0	45566.5	0	0
MEX	Commerce.and.public.services	2000	0	0	60959.8	0	0	0	3600.65	0	0	0	0	64560.5	0	7904	0	63230.4	NA	698.86	136394	0	0	64617.4	0	0	0	3816.69	0	0	0	0	68434.1	0	8220.16	0	63230.4	NA	698.86	140584	0	0	0	3816.69	0	0	49102.2	0	0
MEX	Commerce.and.public.services	2001	0	0	62508.9	0	0	0	3181.97	0	0	0	0	65690.9	0	8437	0	65304	NA	837.82	140270	0	0	66259.5	0	0	0	3372.89	0	0	0	0	69632.3	0	8774.48	0	65304	NA	837.82	144549	0	0	0	3372.89	0	0	50713	0	0
MEX	Commerce.and.public.services	2002	0	0	63513.8	0	0	0	3140.1	0	0	0	0	66653.9	0	9183	0	66974.4	NA	931.81	143743	0	0	67324.6	0	0	0	3328.51	0	0	0	0	70653.1	0	9550.32	0	66974.4	NA	931.81	148110	0	0	0	3328.51	0	0	52010.7	0	0
MEX	Commerce.and.public.services	2003	0	0	38058	0	0	0	3307.57	0	0	0	0	41365.6	0	7512	0	68778	NA	1071.78	118727	0	0	40341.5	0	0	0	3506.03	0	0	0	0	43847.5	0	7812.48	0	68778	NA	1071.78	121510	0	0	0	3506.03	0	0	53411.9	0	0
MEX	Commerce.and.public.services	2004	0	0	56103.1	0	0	0	3516.91	0	0	0	0	59620	0	7717	0	69397.2	NA	1189.76	137924	0	0	59469.3	0	0	0	3727.93	0	0	0	0	63197.2	0	8025.68	0	69397.2	NA	1189.76	141810	0	0	0	3727.93	0	0	53893.3	0	0
MEX	Commerce.and.public.services	2005	0	0	53549.2	0	0	0	3726.25	0	0	0	0	57275.4	0	8099	0	70401.6	NA	1358.74	137135	0	0	56762.1	0	0	0	3949.83	0	0	0	0	60711.9	0	8422.96	0	70401.6	NA	1358.74	140895	0	0	0	3949.83	0	0	54673.8	0	0
MEX	Commerce.and.public.services	2006	0	0	58698.9	0	0	0	4019.33	0	0	0	0	62718.3	0	9282	0	71841.6	NA	1514.7	145357	0	0	62220.9	0	0	0	4260.49	0	0	0	0	66481.4	0	9653.28	0	71841.6	NA	1514.7	149491	0	0	0	4260.49	0	0	55792.7	0	0
MEX	Commerce.and.public.services	2007	0	0	54386.5	0	0	0	4186.8	0	0	0	0	58573.3	0	9476	0	73191.6	NA	1748.66	142990	0	0	57649.7	0	0	0	4438.01	0	0	0	0	62087.7	0	9855.04	0	73191.6	NA	1748.66	146883	0	0	0	4438.01	0	0	56841.7	0	0
MEX	Commerce.and.public.services	2008	0	0	51790.7	0	0	0	4270.54	0	0	0	0	56061.3	0	9937	0	74930.4	NA	2155.57	143084	0	0	54898.2	0	0	0	4526.77	0	0	0	0	59424.9	0	10334.5	0	74930.4	NA	2155.57	146845	0	0	0	4526.77	0	0	58192.7	0	0
MEX	Commerce.and.public.services	2009	0	0	50074.1	0	0	0	4186.8	0	0	0	0	54260.9	0	9560	0	77054.4	NA	2591.5	143467	0	0	53078.6	0	0	0	4438.01	0	0	0	0	57516.6	0	9942.4	0	77054.4	NA	2591.5	147105	0	0	0	4438.01	0	0	59842.8	0	0
MEX	Agriculture.forestry	1971	0	0	376.812	0	0	23739.2	19259.3	0	0	0	0	43375.2	0	0	0	4939.2	NA	0	48314.4	0	0	399.421	0	0	25163.5	20414.8	0	0	0	0	45977.8	0	0	0	4939.2	NA	0	50917	0	0	0	20414.8	0	0	1264.78	0	0
MEX	Agriculture.forestry	1972	0	0	418.68	0	0	23194.9	22566.9	0	0	0	0	46180.4	0	0	0	5900.4	NA	0	52080.8	0	0	443.801	0	0	24586.6	23920.9	0	0	0	0	48951.2	0	0	0	5900.4	NA	0	54851.6	0	0	0	23920.9	0	0	1536.11	0	0
MEX	Agriculture.forestry	1973	0	0	460.548	0	0	23613.6	24116	0	0	0	0	48190.1	0	0	0	6267.6	NA	0	54457.7	0	0	488.181	0	0	25030.4	25562.9	0	0	0	0	51081.5	0	0	0	6267.6	NA	0	57349.1	0	0	0	25562.9	0	0	1658.47	0	0
MEX	Agriculture.forestry	1974	0	0	418.68	0	0	24032.2	30270.6	0	0	0	0	54721.5	0	0	0	7444.8	NA	0	62166.3	0	0	443.801	0	0	25474.2	32086.8	0	0	0	0	58004.8	0	0	0	7444.8	NA	0	65449.6	0	0	0	32086.8	0	0	2001.76	0	0
MEX	Agriculture.forestry	1975	0	0	544.284	0	0	24702.1	37430	0	0	0	0	62676.4	0	0	0	8125.2	NA	0	70801.6	0	0	576.941	0	0	26184.2	39675.8	0	0	0	0	66437	0	0	0	8125.2	NA	0	74562.2	0	0	0	39675.8	0	0	2219.4	0	0
MEX	Agriculture.forestry	1976	0	0	586.152	0	0	24492.8	40025.8	0	0	0	0	65104.7	0	0	0	8773.2	NA	0	73877.9	0	0	621.321	0	0	25962.3	42427.4	0	0	0	0	69011	0	0	0	8773.2	NA	0	77784.2	0	0	0	42427.4	0	0	2433.86	0	0
MEX	Agriculture.forestry	1977	0	0	586.152	0	0	25958.2	41114.4	0	0	0	0	67658.7	0	0	0	9547.2	NA	0	77205.9	0	0	621.321	0	0	27515.6	43581.2	0	0	0	0	71718.2	0	0	0	9547.2	NA	0	81265.4	0	0	0	43581.2	0	0	2689.35	0	0
MEX	Agriculture.forestry	1978	0	0	586.152	0	0	25120.8	45971.1	0	0	0	0	71678	0	0	0	10566	NA	0	82244	0	0	621.321	0	0	26628	48729.3	0	0	0	0	75978.7	0	0	0	10566	NA	0	86544.7	0	0	0	48729.3	0	0	3021.45	0	0
MEX	Agriculture.forestry	1979	0	0	628.02	0	0	27088.6	49529.8	0	0	0	0	77246.5	0	0	0	11980.8	NA	0	89227.3	0	0	665.701	0	0	28713.9	52501.6	0	0	0	0	81881.2	0	0	0	11980.8	NA	0	93862	0	0	0	52501.6	0	0	3477.19	0	0
MEX	Agriculture.forestry	1980	0	0	795.492	0	0	29475.1	53046.8	0	0	0	0	83317.3	0	0	0	13489.2	NA	0	96806.5	0	0	843.222	0	0	31243.6	56229.6	0	0	0	0	88316.4	0	0	0	13489.2	NA	0	101806	0	0	0	56229.6	0	0	3972.57	0	0
MEX	Agriculture.forestry	1981	0	0	837.36	0	0	27926	56856.7	0	0	0	0	85620.1	0	0	0	14130	NA	0	99750.1	0	0	887.602	0	0	29601.5	60268.1	0	0	0	0	90757.3	0	0	0	14130	NA	0	104887	0	0	0	60268.1	0	0	4207.07	0	0
MEX	Agriculture.forestry	1982	0	0	1004.83	0	0	27256.1	60289.9	0	0	0	0	88550.8	0	0	0	17283.6	NA	0	105834	0	0	1065.12	0	0	28891.4	63907.3	0	0	0	0	93863.9	0	0	0	17283.6	NA	0	111147	0	0	0	63907.3	0	0	5202.02	0	0
MEX	Agriculture.forestry	1983	0	0	1130.44	0	0	20306	54009.7	0	0	0	0	75446.1	0	0	0	15984	NA	0	91430.1	0	0	1198.26	0	0	21524.3	57250.3	0	0	0	0	79972.9	0	0	0	15984	NA	0	95956.9	0	0	0	57250.3	0	0	4862.65	0	0
MEX	Agriculture.forestry	1984	0	0	1172.3	0	0	17124	55935.6	41.868	0	0	0	74273.8	0	0	0	16729.2	NA	0	91003	0	0	1242.64	0	0	18151.5	59291.8	44.3801	0	0	0	78730.3	0	0	0	16729.2	NA	0	95459.5	0	0	0	59291.8	0	0	5143.56	0	0
MEX	Agriculture.forestry	1985	0	0	1172.3	0	0	17626.4	56605.5	83.736	0	0	0	75488	0	0	0	17863.2	NA	0	93351.2	0	0	1242.64	0	0	18684	60001.9	88.7602	0	0	0	80017.3	0	0	0	17863.2	NA	0	97880.5	0	0	0	60001.9	0	0	5550.1	0	0
MEX	Agriculture.forestry	1986	0	0	1256.04	0	0	14402.6	57484.8	83.736	0	0	0	73227.1	0	0	0	19486.8	NA	0	92713.9	0	0	1331.4	0	0	15266.7	60933.8	88.7602	0	0	0	77620.8	0	0	0	19486.8	NA	0	97107.6	0	0	0	60933.8	0	0	6117.69	0	0
MEX	Agriculture.forestry	1987	0	0	1297.91	0	0	18505.7	57945.3	0	0	0	0	77748.9	0	0	0	21661.2	NA	0	99410.1	0	0	1375.78	0	0	19616	61422	0	0	0	0	82413.8	0	0	0	21661.2	NA	0	104075	0	0	0	61422	0	0	6870.5	0	0
MEX	Agriculture.forestry	1988	0	0	1297.91	0	0	18296.3	61211	0	0	0	0	80805.2	0	0	0	23072.4	NA	0	103878	0	0	1375.78	0	0	19394.1	64883.7	0	0	0	0	85653.6	0	0	0	23072.4	NA	0	108726	0	0	0	64883.7	0	0	7392.86	0	0
MEX	Agriculture.forestry	1989	0	0	1339.78	0	0	12560.4	57317.3	0	0	0	0	71217.5	0	0	0	25981.2	NA	0	97198.7	0	0	1420.16	0	0	13314	60756.3	0	0	0	0	75490.5	0	0	0	25981.2	NA	0	101472	0	0	0	60756.3	0	0	8409.08	0	0
MEX	Agriculture.forestry	1990	0	0	1423.51	0	0	6363.94	60373.7	0	0	0	0	68161.1	0	0	0	24145.2	NA	0	92306.3	0	0	1508.92	0	0	6745.77	63996.1	0	0	0	0	72250.8	0	0	0	24145.2	NA	0	96396	0	0	0	63996.1	0	0	7893.07	0	0
MEX	Agriculture.forestry	1991	0	0	1507.25	0	0	4731.08	64309.2	0	0	0	0	70547.6	0	0	0	23389.2	NA	0	93936.8	0	0	1597.68	0	0	5014.95	68167.8	0	0	0	0	74780.4	0	0	0	23389.2	NA	0	98169.6	0	0	0	68167.8	0	0	7946.01	0	0
MEX	Agriculture.forestry	1992	0	0	962.964	0	0	3935.59	66193.3	0	0	0	0	71091.9	0	0	0	20419.2	NA	0	91511.1	0	0	1020.74	0	0	4171.73	70164.9	0	0	0	0	75357.4	0	0	0	20419.2	NA	0	95776.6	0	0	0	70164.9	0	0	7198.99	0	0
MEX	Agriculture.forestry	1993	0	0	1004.83	0	0	3181.97	67365.6	0	0	0	0	71552.4	0	0	0	21312	NA	0	92864.4	0	0	1065.12	0	0	3372.89	71407.5	0	0	0	0	75845.6	0	0	0	21312	NA	0	97157.6	0	0	0	71407.5	0	0	7787.19	0	0
MEX	Agriculture.forestry	1994	0	0	1046.7	0	0	2972.63	63388.2	0	0	0	0	67407.5	0	0	0	23583.6	NA	0	90991.1	0	0	1109.5	0	0	3150.99	67191.4	0	0	0	0	71451.9	0	0	0	23583.6	NA	0	95035.5	0	0	0	67191.4	0	0	8919.79	0	0
MEX	Agriculture.forestry	1995	0	0	1046.7	0	0	3140.1	65230.3	0	0	0	0	69417.1	0	0	0	24084	NA	0	93501.1	0	0	1109.5	0	0	3328.51	69144.2	0	0	0	0	73582.2	0	0	0	24084	NA	0	97666.2	0	0	0	69144.2	0	0	9418.05	0	0
MEX	Agriculture.forestry	1996	0	0	1046.7	0	0	3809.99	70128.9	0	0	0	0	74985.6	0	0	0	27154.8	NA	0	102140	0	0	1109.5	0	0	4038.59	74336.6	0	0	0	0	79484.7	0	0	0	27154.8	NA	0	106640	0	0	0	74336.6	0	0	10967.3	0	0
MEX	Agriculture.forestry	1997	0	0	1004.83	0	0	3684.38	75278.7	0	0	0	0	79967.9	0	0	0	27543.6	NA	0	107511	0	0	1065.12	0	0	3905.45	79795.4	0	0	0	0	84766	0	0	0	27543.6	NA	0	112310	0	0	0	79795.4	0	0	11477.7	0	0
MEX	Agriculture.forestry	1998	0	0	1130.44	0	0	41.868	78544.4	0	0	0	0	79716.7	0	0	0	27874.8	NA	0	107591	0	0	1198.26	0	0	44.3801	83257	0	0	0	0	84499.7	0	0	0	27874.8	NA	0	112374	0	0	0	83257	0	0	11973.3	0	0
MEX	Agriculture.forestry	1999	0	0	7494.37	0	0	41.868	80763.4	0	0	0	0	88299.6	0	0	0	28785.6	NA	0	117085	0	0	7944.03	0	0	44.3801	85609.2	0	0	0	0	93597.6	0	0	0	28785.6	NA	0	122383	0	0	0	85609.2	0	0	12733.9	0	0
MEX	Agriculture.forestry	2000	0	0	7243.16	0	0	41.868	80679.6	0	0	0	0	87964.7	0	0	0	28443.6	NA	0	116408	0	0	7677.75	0	0	44.3801	85520.4	0	0	0	0	93242.5	0	0	0	28443.6	NA	0	121686	0	0	0	85520.4	0	0	12947.5	0	0
MEX	Agriculture.forestry	2001	0	0	8624.81	0	0	41.868	78502.5	0	0	0	0	87169.2	0	0	0	26866.8	NA	0	114036	0	0	9142.3	0	0	44.3801	83212.7	0	0	0	0	92399.3	0	0	0	26866.8	NA	0	119266	0	0	0	83212.7	0	0	12229.7	0	0
MEX	Agriculture.forestry	2002	0	0	7661.84	0	0	41.868	76241.6	0	0	0	0	83945.3	0	0	0	25977.6	NA	0	109923	0	0	8121.55	0	0	44.3801	80816.1	0	0	0	0	88982.1	0	0	0	25977.6	NA	0	114960	0	0	0	80816.1	0	0	11824.8	0	0
MEX	Agriculture.forestry	2003	0	0	7703.71	0	0	41.868	81642.6	0	0	0	0	89388.2	0	0	0	26416.8	NA	0	115805	0	0	8165.93	0	0	44.3801	86541.2	0	0	0	0	94751.5	0	0	0	26416.8	NA	0	121168	0	0	0	86541.2	0	0	12024.6	0	0
MEX	Agriculture.forestry	2004	0	0	7201.3	0	0	41.868	86457.4	0	0	0	0	93700.6	0	0	0	25084.8	NA	0	118785	0	0	7633.37	0	0	44.3801	91644.9	0	0	0	0	99322.6	0	0	0	25084.8	NA	0	124407	0	0	0	91644.9	0	0	11418.2	0	0
MEX	Agriculture.forestry	2005	0	0	7494.37	0	0	41.868	91523.4	0	0	0	0	99059.7	0	0	0	29041.2	NA	0	128101	0	0	7944.03	0	0	44.3801	97014.9	0	0	0	0	105003	0	0	0	29041.2	NA	0	134044	0	0	0	97014.9	0	0	13218.9	0	0
MEX	Agriculture.forestry	2006	0	0	5317.24	0	0	41.868	98850.3	0	0	0	0	104209	0	0	0	28652.4	NA	0	132862	0	0	5636.27	0	0	44.3801	104781	0	0	0	0	110462	0	0	0	28652.4	NA	0	139114	0	0	0	104781	0	0	13041.8	0	0
MEX	Agriculture.forestry	2007	0	0	4144.93	0	0	41.868	103875	0	0	0	0	108061	0	0	0	28094.4	NA	0	136156	0	0	4393.63	0	0	44.3801	110107	0	0	0	0	114545	0	0	0	28094.4	NA	0	142639	0	0	0	110107	0	0	12787.7	0	0
MEX	Agriculture.forestry	2008	0	0	4479.88	0	0	41.868	107517	0	0	0	0	112039	0	0	0	29192.4	NA	0	141231	0	0	4748.67	0	0	44.3801	113968	0	0	0	0	118761	0	0	0	29192.4	NA	0	147953	0	0	0	113968	0	0	13287.4	0	0
MEX	Agriculture.forestry	2009	0	0	4438.01	0	0	41.868	110113	0	0	0	0	114593	0	0	0	33476.4	NA	0	148069	0	0	4704.29	0	0	44.3801	116720	0	0	0	0	121468	0	0	0	33476.4	NA	0	154945	0	0	0	116720	0	0	15237.2	0	0
MEX	Non.specified	1971	0	0	0	0	0	0	0	0	0	0	0	0	0	0	0	8762.4	NA	0	8762.4	0	0	0	0	0	0	0	0	0	0	0	0	0	0	0	8762.4	NA	0	8762.4	0	0	0	0	0	0	6281.03	0	0
MEX	Non.specified	1972	0	0	0	0	0	0	0	0	0	0	0	0	0	0	0	9691.2	NA	0	9691.2	0	0	0	0	0	0	0	0	0	0	0	0	0	0	0	9691.2	NA	0	9691.2	0	0	0	0	0	0	6944.35	0	0
MEX	Non.specified	1973	0	0	0	0	0	0	0	0	0	0	0	0	0	0	0	9792	NA	0	9792	0	0	0	0	0	0	0	0	0	0	0	0	0	0	0	9792	NA	0	9792	0	0	0	0	0	0	7014.09	0	0
MEX	Non.specified	1974	0	0	0	0	0	0	0	0	0	0	0	0	0	0	0	10202.4	NA	0	10202.4	0	0	0	0	0	0	0	0	0	0	0	0	0	0	0	10202.4	NA	0	10202.4	0	0	0	0	0	0	7305.47	0	0
MEX	Non.specified	1975	0	0	0	0	0	0	0	0	0	0	0	0	0	0	0	10440	NA	0	10440	0	0	0	0	0	0	0	0	0	0	0	0	0	0	0	10440	NA	0	10440	0	0	0	0	0	0	7472.95	0	0
MEX	Non.specified	1976	0	0	0	0	0	0	0	0	0	0	0	0	0	0	0	9914.4	NA	0	9914.4	0	0	0	0	0	0	0	0	0	0	0	0	0	0	0	9914.4	NA	0	9914.4	0	0	0	0	0	0	7094.21	0	0
MEX	Non.specified	1977	0	0	0	0	0	0	0	0	0	0	0	0	0	0	0	11361.6	NA	0	11361.6	0	0	0	0	0	0	0	0	0	0	0	0	0	0	0	11361.6	NA	0	11361.6	0	0	0	0	0	0	8126.86	0	0
MEX	Non.specified	1978	0	0	0	0	0	0	0	0	0	0	0	0	0	0	0	13791.6	NA	0	13791.6	0	0	0	0	0	0	0	0	0	0	0	0	0	0	0	13791.6	NA	0	13791.6	0	0	0	0	0	0	9861.52	0	0
MEX	Non.specified	1979	0	0	0	0	0	0	0	0	0	0	0	0	0	0	0	13766.4	NA	0	13766.4	0	0	0	0	0	0	0	0	0	0	0	0	0	0	0	13766.4	NA	0	13766.4	0	0	0	0	0	0	9840	0	0
MEX	Non.specified	1980	0	0	0	0	0	0	0	0	0	0	0	0	0	0	0	17463.6	NA	0	17463.6	0	0	0	0	0	0	0	0	0	0	0	0	0	0	0	17463.6	NA	0	17463.6	0	0	0	0	0	0	12478.3	0	0
MEX	Non.specified	1981	0	0	0	0	0	0	0	0	0	0	0	0	0	0	0	18097.2	NA	0	18097.2	0	0	0	0	0	0	0	0	0	0	0	0	0	0	0	18097.2	NA	0	18097.2	0	0	0	0	0	0	12960.3	0	0
MEX	Non.specified	1982	0	0	0	0	0	0	0	0	0	0	0	0	0	0	0	23392.8	NA	0	23392.8	0	0	0	0	0	0	0	0	0	0	0	0	0	0	0	23392.8	NA	0	23392.8	0	0	0	0	0	0	16790.7	0	0
MEX	Non.specified	1983	0	0	0	0	0	0	0	0	0	0	0	0	0	0	0	24156	NA	0	24156	0	0	0	0	0	0	0	0	0	0	0	0	0	0	0	24156	NA	0	24156	0	0	0	0	0	0	17377.7	0	0
MEX	Non.specified	1984	0	0	0	0	0	0	0	0	0	0	0	0	0	0	0	25452	NA	0	25452	0	0	0	0	0	0	0	0	0	0	0	0	0	0	0	25452	NA	0	25452	0	0	0	0	0	0	18351.3	0	0
MEX	Non.specified	1985	0	0	0	0	0	0	0	0	0	0	0	0	0	0	0	26182.8	NA	0	26182.8	0	0	0	0	0	0	0	0	0	0	0	0	0	0	0	26182.8	NA	0	26182.8	0	0	0	0	0	0	18920.7	0	0
MEX	Non.specified	1986	0	0	0	0	0	0	0	0	0	0	0	0	0	0	0	26575.2	NA	0	26575.2	0	0	0	0	0	0	0	0	0	0	0	0	0	0	0	26575.2	NA	0	26575.2	0	0	0	0	0	0	19247.3	0	0
MEX	Non.specified	1987	0	0	0	0	0	0	0	0	0	0	0	0	0	0	0	26377.2	NA	0	26377.2	0	0	0	0	0	0	0	0	0	0	0	0	0	0	0	26377.2	NA	0	26377.2	0	0	0	0	0	0	19146.7	0	0
MEX	Non.specified	1988	0	0	0	0	0	0	0	0	0	0	0	0	0	0	0	27288	NA	0	27288	0	0	0	0	0	0	0	0	0	0	0	0	0	0	0	27288	NA	0	27288	0	0	0	0	0	0	19852.1	0	0
MEX	Non.specified	1989	0	0	0	0	0	0	0	0	0	0	0	0	0	0	0	26200.8	NA	0	26200.8	0	0	0	0	0	0	0	0	0	0	0	0	0	0	0	26200.8	NA	0	26200.8	0	0	0	0	0	0	19103.6	0	0
MEX	Non.specified	1990	0	0	0	0	0	0	0	0	0	0	0	0	0	0	0	28908	NA	0	28908	0	0	0	0	0	0	0	0	0	0	0	0	0	0	0	28908	NA	0	28908	0	0	0	0	0	0	21124.4	0	0
MEX	Non.specified	1991	0	0	0	0	0	0	0	0	0	0	0	0	0	0	0	0	NA	0	0	0	0	0	0	0	0	0	0	0	0	0	0	0	0	0	0	NA	0	0	0	0	0	0	0	0	0	0	0
MEX	Non.specified	1992	0	0	0	0	0	0	0	0	0	0	0	0	0	0	0	0	NA	0	0	0	0	0	0	0	0	0	0	0	0	0	0	0	0	0	0	NA	0	0	0	0	0	0	0	0	0	0	0
MEX	Non.specified	1993	0	0	0	0	0	0	0	0	0	0	0	0	0	0	0	0	NA	0	0	0	0	0	0	0	0	0	0	0	0	0	0	0	0	0	0	NA	0	0	0	0	0	0	0	0	0	0	0
MEX	Non.specified	1994	0	0	0	0	0	0	0	0	0	0	0	0	0	0	0	0	NA	0	0	0	0	0	0	0	0	0	0	0	0	0	0	0	0	0	0	NA	0	0	0	0	0	0	0	0	0	0	0
MEX	Non.specified	1995	0	0	0	0	0	0	0	0	0	0	0	0	0	0	0	0	NA	0	0	0	0	0	0	0	0	0	0	0	0	0	0	0	0	0	0	NA	0	0	0	0	0	0	0	0	0	0	0
MEX	Non.specified	1996	0	0	0	0	0	0	0	0	0	0	0	0	0	0	0	0	NA	0	0	0	0	0	0	0	0	0	0	0	0	0	0	0	0	0	0	NA	0	0	0	0	0	0	0	0	0	0	0
MEX	Non.specified	1997	0	0	0	0	0	0	0	0	0	0	0	0	0	0	0	0	NA	0	0	0	0	0	0	0	0	0	0	0	0	0	0	0	0	0	0	NA	0	0	0	0	0	0	0	0	0	0	0
MEX	Non.specified	1998	0	0	0	0	0	0	0	0	0	0	0	0	0	0	0	0	NA	0	0	0	0	0	0	0	0	0	0	0	0	0	0	0	0	0	0	NA	0	0	0	0	0	0	0	0	0	0	0
MEX	Non.specified	1999	0	0	0	0	0	0	0	0	0	0	0	0	0	0	0	0	NA	0	0	0	0	0	0	0	0	0	0	0	0	0	0	0	0	0	0	NA	0	0	0	0	0	0	0	0	0	0	0
MEX	Non.specified	2000	0	0	0	0	0	0	0	0	0	0	0	0	0	0	0	0	NA	0	0	0	0	0	0	0	0	0	0	0	0	0	0	0	0	0	0	NA	0	0	0	0	0	0	0	0	0	0	0
MEX	Non.specified	2001	0	0	0	0	0	0	0	0	0	0	0	0	0	0	0	0	NA	0	0	0	0	0	0	0	0	0	0	0	0	0	0	0	0	0	0	NA	0	0	0	0	0	0	0	0	0	0	0
MEX	Non.specified	2002	0	0	0	0	0	0	0	0	0	0	0	0	0	0	0	0	NA	0	0	0	0	0	0	0	0	0	0	0	0	0	0	0	0	0	0	NA	0	0	0	0	0	0	0	0	0	0	0
MEX	Non.specified	2003	0	0	0	0	0	0	0	0	0	0	0	0	0	0	0	22122	NA	0	22122	0	0	0	0	0	0	0	0	0	0	0	0	0	0	0	22122	NA	0	22122	0	0	0	0	0	0	17179.6	0	0
MEX	Non.specified	2004	0	0	0	0	0	0	0	0	0	0	0	0	0	0	0	35658	NA	0	35658	0	0	0	0	0	0	0	0	0	0	0	0	0	0	0	35658	NA	0	35658	0	0	0	0	0	0	27691.7	0	0
MEX	Non.specified	2005	0	0	0	0	0	0	0	0	0	0	0	0	0	0	0	41140.8	NA	0	41140.8	0	0	0	0	0	0	0	0	0	0	0	0	0	0	0	41140.8	NA	0	41140.8	0	0	0	0	0	0	31949.9	0	0
MEX	Non.specified	2006	0	0	0	0	0	0	0	0	0	0	0	0	0	0	0	38761.2	NA	0	38761.2	0	0	0	0	0	0	0	0	0	0	0	0	0	0	0	38761.2	NA	0	38761.2	0	0	0	0	0	0	30102.2	0	0
MEX	Non.specified	2007	0	0	0	0	0	0	0	0	0	0	0	0	0	0	0	43801.2	NA	0	43801.2	0	0	0	0	0	0	0	0	0	0	0	0	0	0	0	43801.2	NA	0	43801.2	0	0	0	0	0	0	34016.7	0	0
MEX	Non.specified	2008	0	0	0	0	0	0	0	0	0	0	0	0	0	0	0	44229.6	NA	0	44229.6	0	0	0	0	0	0	0	0	0	0	0	0	0	0	0	44229.6	NA	0	44229.6	0	0	0	0	0	0	34349.7	0	0
MEX	Non.specified	2009	0	0	0	0	0	0	0	0	0	0	0	0	0	0	0	43419.6	NA	0	43419.6	0	0	0	0	0	0	0	0	0	0	0	0	0	0	0	43419.6	NA	0	43419.6	0	0	0	0	0	0	33721	0	0
MEX	Transport	1971	0	0	8472	285144	18650	0	115549	3162	0	0	0	430977	0	0	0	879	NA	0	431856	0	0	8980.32	302253	19769	0	122482	3351.72	0	0	0	456836	0	0	0	879	NA	0	457715	8980.32	302253	19769	122482	3351.72	0	879	0	0
MEX	Transport	1972	0	0	9848	307839	21514	0	137055	3643	0	0	0	479899	0	0	0	1063	NA	0	480962	0	0	10438.9	326309	22804.8	0	145278	3861.58	0	0	0	508693	0	0	0	1063	NA	0	509756	10438.9	326309	22804.8	145278	3861.58	0	1063	0	0
MEX	Transport	1973	0	0	10938	341322	24843	0	142449	4316	0	0	0	523868	0	0	0	1281	NA	0	525149	0	0	11594.3	361801	26333.6	0	150996	4574.96	0	0	0	555300	0	0	0	1281	NA	0	556581	11594.3	361801	26333.6	150996	4574.96	0	1281	0	0
MEX	Transport	1974	0	0	10043	352515	33017	0	175342	4554	0	0	0	575471	0	0	0	1293	NA	0	576764	0	0	10645.6	373666	34998	0	185863	4827.24	0	0	0	609999	0	0	0	1293	NA	0	611292	10645.6	373666	34998	185863	4827.24	0	1293	0	0
MEX	Transport	1975	0	0	9697	361324	32162	0	204362	4745	0	0	0	612290	0	0	0	1302	NA	0	613592	0	0	10278.8	383003	34091.7	0	216624	5029.7	0	0	0	649027	0	0	0	1302	NA	0	650329	10278.8	383003	34091.7	216624	5029.7	0	1302	0	0
MEX	Transport	1976	0	0	8886	388756	37277	0	226914	6475	0	0	0	668308	0	0	0	1260	NA	0	669568	0	0	9419.16	412081	39513.6	0	240529	6863.5	0	0	0	708406	0	0	0	1260	NA	0	709666	9419.16	412081	39513.6	240529	6863.5	0	1260	0	0
MEX	Transport	1977	0	0	8508	410506	39329	0	244041	7557	0	0	0	709941	0	0	0	1340	NA	0	711281	0	0	9018.48	435136	41688.7	0	258683	8010.42	0	0	0	752537	0	0	0	1340	NA	0	753877	9018.48	435136	41688.7	258683	8010.42	0	1340	0	0
MEX	Transport	1978	0	0	7000	445241	41135	0	266959	11626	0	0	0	771961	0	0	0	1511	NA	0	773472	0	0	7420	471955	43603.1	0	282977	12323.6	0	0	0	818279	0	0	0	1511	NA	0	819790	7420	471955	43603.1	282977	12323.6	0	1511	0	0
MEX	Transport	1979	0	0	6022	515774	50187	0	290506	12063	0	0	0	874552	0	0	0	1482	NA	0	876034	0	0	6383.32	546720	53198.2	0	307936	12786.8	0	0	0	927025	0	0	0	1482	NA	0	928507	6383.32	546720	53198.2	307936	12786.8	0	1482	0	0
MEX	Transport	1980	0	0	6241	589599	56818	0	314871	12418	0	0	0	979947	0	0	0	1561	NA	0	981508	0	0	6615.46	624975	60227.1	0	333763	13163.1	0	0	0	1.03874e+06	0	0	0	1561	NA	0	1.0403e+06	6615.46	624975	60227.1	333763	13163.1	0	1561	0	0
MEX	Transport	1981	0	0	5262	669864	58831	0	342404	13153	0	0	0	1089514	0	0	0	1641	NA	0	1091155	0	0	5577.72	710056	62360.9	0	362948	13942.2	0	0	0	1.15488e+06	0	0	0	1641	NA	0	1.15653e+06	5577.72	710056	62360.9	362948	13942.2	0	1641	0	0
MEX	Transport	1982	0	0	7633	675798	57363	0	331644	11654	0	0	0	1084092	0	0	0	1616	NA	0	1085708	0	0	8090.98	716346	60804.8	0	351543	12353.2	0	0	0	1.14914e+06	0	0	0	1616	NA	0	1.15075e+06	8090.98	716346	60804.8	351543	12353.2	0	1616	0	0
MEX	Transport	1983	0	0	15265	593314	55978	0	297188	11586	0	0	0	973331	0	0	0	1896	NA	0	975227	0	0	16180.9	628913	59336.7	0	315019	12281.2	0	0	0	1.03173e+06	0	0	0	1896	NA	0	1.03363e+06	16180.9	628913	59336.7	315019	12281.2	0	1896	0	0
MEX	Transport	1984	0	0	38856	605898	58269	0	307732	16304	0	0	0	1027059	0	0	0	2239	NA	0	1029298	0	0	41187.4	642252	61765.1	0	326196	17282.2	0	0	0	1.08868e+06	0	0	0	2239	NA	0	1.09092e+06	41187.4	642252	61765.1	326196	17282.2	0	2239	0	0
MEX	Transport	1985	0	0	45796	606129	60819	0	308837	16502	0	0	0	1038083	0	0	0	2340	NA	0	1040423	0	0	48543.8	642497	64468.1	0	327367	17492.1	0	0	0	1.10037e+06	0	0	0	2340	NA	0	1.10271e+06	48543.8	642497	64468.1	327367	17492.1	0	2340	0	0
MEX	Transport	1986	0	0	41978	622122	58294	0	291778	17170	0	0	0	1031342	0	0	0	2574	NA	0	1033916	0	0	44496.7	659449	61791.6	0	309285	18200.2	0	0	0	1.09322e+06	0	0	0	2574	NA	0	1.0958e+06	44496.7	659449	61791.6	309285	18200.2	0	2574	0	0
MEX	Transport	1987	0	0	33888	651412	60203	0	294853	16650	0	0	0	1057006	0	0	0	2704	NA	0	1059710	0	0	35921.3	690497	63815.2	0	312544	17649	0	0	0	1.12043e+06	0	0	0	2704	NA	0	1.12313e+06	35921.3	690497	63815.2	312544	17649	0	2704	0	0
MEX	Transport	1988	0	0	33136	678535	54098	0	287483	16232	0	0	0	1069484	0	0	0	2842	NA	0	1072326	0	0	35124.2	719247	57343.9	0	304732	17205.9	0	0	0	1.13365e+06	0	0	0	2842	NA	0	1.1365e+06	35124.2	719247	57343.9	304732	17205.9	0	2842	0	0
MEX	Transport	1989	0	0	34588	759958	64165	0	304630	17540	0	0	0	1180881	0	0	0	2779	NA	0	1183660	0	0	36663.3	805555	68014.9	0	322908	18592.4	0	0	0	1.25173e+06	0	0	0	2779	NA	0	1.25451e+06	36663.3	805555	68014.9	322908	18592.4	0	2779	0	0
MEX	Transport	1990	0	0	15238	839590	71869	0	325217	20691	0	0	0	1272605	0	0	0	2708	NA	0	1275313	0	0	16152.3	889965	76181.1	0	344730	21932.5	0	0	0	1.34896e+06	0	0	0	2708	NA	0	1.35167e+06	16152.3	889965	76181.1	344730	21932.5	0	2708	0	0
MEX	Transport	1991	0	0	16073	904614	74561	0	344786	17557	0	0	0	1357591	0	0	0	2901	NA	0	1360492	0	0	17037.4	958891	79034.7	0	365473	18610.4	0	0	0	1.43905e+06	0	0	0	2901	NA	0	1.44195e+06	17037.4	958891	79034.7	365473	18610.4	0	2901	0	0
MEX	Transport	1992	0	0	17521	914211	83303	0	352002	2422	0	0	0	1369459	0	0	0	3144	NA	0	1372603	0	0	18572.3	969064	88301.2	0	373122	2567.32	0	0	0	1.45163e+06	0	0	0	3144	NA	0	1.45477e+06	18572.3	969064	88301.2	373122	2567.32	0	3144	0	0
MEX	Transport	1993	0	0	17680	931450	88276	0	360942	1766	0	0	0	1400114	0	0	0	3219	NA	0	1403333	0	0	18740.8	987337	93572.6	0	382599	1871.96	0	0	0	1.48412e+06	0	0	0	3219	NA	0	1.48734e+06	18740.8	987337	93572.6	382599	1871.96	0	3219	0	0
MEX	Transport	1994	0	0	17872	956655	98832	0	393302	1682	0	0	0	1468343	0	0	0	3388	NA	0	1471731	0	0	18944.3	1.01405e+06	104762	0	416900	1782.92	0	0	0	1.55644e+06	0	0	0	3388	NA	0	1.55983e+06	18944.3	1.01405e+06	104762	416900	1782.92	0	3388	0	0
MEX	Transport	1995	0	0	18557	932774	91528	0	351296	1398	0	0	0	1395553	0	0	0	3529	NA	0	1399082	0	0	19670.4	988740	97019.7	0	372374	1481.88	0	0	0	1.47929e+06	0	0	0	3529	NA	0	1.48282e+06	19670.4	988740	97019.7	372374	1481.88	0	3529	0	0
MEX	Transport	1996	0	0	19179	930228	91076	0	373091	1679	0	0	0	1415253	0	0	0	3573	NA	0	1418826	0	0	20329.7	986042	96540.6	0	395476	1779.74	0	0	0	1.50017e+06	0	0	0	3573	NA	0	1.50374e+06	20329.7	986042	96540.6	395476	1779.74	0	3573	0	0
MEX	Transport	1997	0	0	19067	959136	97981	0	396683	1687	0	0	0	1474554	0	0	0	3588	NA	0	1478142	0	0	20211	1.01668e+06	103860	0	420484	1788.22	0	0	0	1.56303e+06	0	0	0	3588	NA	0	1.56662e+06	20211	1.01668e+06	103860	420484	1788.22	0	3588	0	0
MEX	Transport	1998	0	0	19706	984225	108119	0	408968	2643	0	0	0	1523661	0	0	0	3600	NA	0	1527261	0	0	20888.4	1.04328e+06	114606	0	433506	2801.58	0	0	0	1.61508e+06	0	0	0	3600	NA	0	1.61868e+06	20888.4	1.04328e+06	114606	433506	2801.58	0	3600	0	0
MEX	Transport	1999	0	0	35344	957324	114394	0	428792	8424	0	0	0	1544278	0	9	0	3645	NA	0	1547932	0	0	37464.6	1.01476e+06	121258	0	454520	8929.44	0	0	0	1.63693e+06	0	9.36	0	3645	NA	0	1.64059e+06	37464.6	1.01476e+06	121258	454520	8929.44	9.36	3645	0	0
MEX	Transport	2000	0	0	45240	998060	115110	0	439150	12790	0	0	0	1610350	0	258	0	3860	NA	0	1614468	0	0	47954.4	1.05794e+06	122017	0	465499	13557.4	0	0	0	1706971	0	268.32	0	3860	NA	0	1.7111e+06	47954.4	1.05794e+06	122017	465499	13557.4	268.32	3860	0	0
MEX	Transport	2001	0	0	48310	1015980	113020	0	421230	8080	0	0	0	1606620	0	546	0	3980	NA	0	1611146	0	0	51208.6	1.07694e+06	119801	0	446504	8564.8	0	0	0	1.70302e+06	0	567.84	0	3980	NA	0	1.70757e+06	51208.6	1.07694e+06	119801	446504	8564.8	567.84	3980	0	0
MEX	Transport	2002	0	0	53760	1042990	108890	0	417870	4760	0	0	0	1628270	0	716	0	3940	NA	0	1632926	0	0	56985.6	1.10557e+06	115423	0	442942	5045.6	0	0	0	1.72597e+06	0	744.64	0	3940	NA	0	1.73065e+06	56985.6	1.10557e+06	115423	442942	5045.6	744.64	3940	0	0
MEX	Transport	2003	0	0	57190	1065530	105830	0	447030	3560	0	0	0	1679140	0	803	0	3870	NA	0	1683813	0	0	60621.4	1.12946e+06	112180	0	473852	3773.6	0	0	0	1.77989e+06	0	835.12	0	3870	NA	0	1.78459e+06	60621.4	1.12946e+06	112180	473852	3773.6	835.12	3870	0	0
MEX	Transport	2004	0	0	57310	1241830	117010	0	486980	4130	0	0	0	1907260	0	808	0	3800	NA	0	1911868	0	0	60748.6	1.31634e+06	124031	0	516199	4377.8	0	0	0	2.0217e+06	0	840.32	0	3800	NA	0	2.02634e+06	60748.6	1.31634e+06	124031	516199	4377.8	840.32	3800	0	0
MEX	Transport	2005	0	0	48690	1195010	111830	0	490370	4370	0	0	0	1850270	0	760	0	3800	NA	0	1854830	0	0	51611.4	1.26671e+06	118540	0	519792	4632.2	0	0	0	1.96129e+06	0	790.4	0	3800	NA	0	1.96588e+06	51611.4	1.26671e+06	118540	519792	4632.2	790.4	3800	0	0
MEX	Transport	2006	0	0	38580	1278200	116620	0	523380	5070	0	0	0	1961850	0	810	0	3790	NA	0	1966450	0	0	40894.8	1354892	123617	0	554783	5374.2	0	0	0	2079561	0	842.4	0	3790	NA	0	2.08419e+06	40894.8	1354892	123617	554783	5374.2	842.4	3790	0	0
MEX	Transport	2007	0	0	46450	1395400	133220	0	574400	6640	0	0	0	2156110	0	732	0	3790	NA	0	2160632	0	0	49237	1.47912e+06	141213	0	608864	7038.4	0	0	0	2.28548e+06	0	761.28	0	3790	NA	0	2.29003e+06	49237	1.47912e+06	141213	608864	7038.4	761.28	3790	0	0
MEX	Transport	2008	0	0	43960	1607510	129570	0	646120	5770	0	0	0	2432930	0	651	0	3860	NA	0	2437441	0	0	46597.6	1.70396e+06	137344	0	684887	6116.2	0	0	0	2.57891e+06	0	677.04	0	3860	NA	0	2.58344e+06	46597.6	1.70396e+06	137344	684887	6116.2	677.04	3860	0	0
MEX	Transport	2009	0	0	40670	1498760	109870	0	569190	4770	0	0	0	2223260	0	591	0	3860	NA	0	2227711	0	0	43110.2	1.58869e+06	116462	0	603341	5056.2	0	0	0	2.35666e+06	0	614.64	0	3860	NA	0	2.36113e+06	43110.2	1.58869e+06	116462	603341	5056.2	614.64	3860	0	0
MEX	Road	1971	0	0	8472	283503	0	0	102069	0	0	0	0	394044	0	0	0	0	NA	0	394044	0	0	8980.32	300513	0	0	108193	0	0	0	0	417687	0	0	0	0	NA	0	417687	8980.32	300513	0	108193	0	0	0	0	0
MEX	Road	1972	0	0	9848	306043	0	0	122776	0	0	0	0	438667	0	0	0	0	NA	0	438667	0	0	10438.9	324406	0	0	130143	0	0	0	0	464987	0	0	0	0	NA	0	464987	10438.9	324406	0	130143	0	0	0	0	0
MEX	Road	1973	0	0	10938	339584	0	0	127691	0	0	0	0	478213	0	0	0	0	NA	0	478213	0	0	11594.3	359959	0	0	135352	0	0	0	0	506906	0	0	0	0	NA	0	506906	11594.3	359959	0	135352	0	0	0	0	0
MEX	Road	1974	0	0	10043	350872	0	0	159052	0	0	0	0	519967	0	0	0	0	NA	0	519967	0	0	10645.6	371924	0	0	168595	0	0	0	0	551165	0	0	0	0	NA	0	551165	10645.6	371924	0	168595	0	0	0	0	0
MEX	Road	1975	0	0	9697	359625	0	0	186611	0	0	0	0	555933	0	0	0	0	NA	0	555933	0	0	10278.8	381202	0	0	197808	0	0	0	0	589289	0	0	0	0	NA	0	589289	10278.8	381202	0	197808	0	0	0	0	0
MEX	Road	1976	0	0	8886	386980	0	0	209245	0	0	0	0	605111	0	0	0	0	NA	0	605111	0	0	9419.16	410199	0	0	221800	0	0	0	0	641418	0	0	0	0	NA	0	641418	9419.16	410199	0	221800	0	0	0	0	0
MEX	Road	1977	0	0	8508	409077	0	0	225969	0	0	0	0	643554	0	0	0	0	NA	0	643554	0	0	9018.48	433622	0	0	239527	0	0	0	0	682167	0	0	0	0	NA	0	682167	9018.48	433622	0	239527	0	0	0	0	0
MEX	Road	1978	0	0	7000	443407	0	0	247297	0	0	0	0	697704	0	0	0	0	NA	0	697704	0	0	7420	470011	0	0	262135	0	0	0	0	739566	0	0	0	0	NA	0	739566	7420	470011	0	262135	0	0	0	0	0
MEX	Road	1979	0	0	6022	513710	0	0	270873	0	0	0	0	790605	0	0	0	0	NA	0	790605	0	0	6383.32	544533	0	0	287125	0	0	0	0	838041	0	0	0	0	NA	0	838041	6383.32	544533	0	287125	0	0	0	0	0
MEX	Road	1980	0	0	6241	587551	0	0	291756	0	0	0	0	885548	0	0	0	0	NA	0	885548	0	0	6615.46	622804	0	0	309261	0	0	0	0	938681	0	0	0	0	NA	0	938681	6615.46	622804	0	309261	0	0	0	0	0
MEX	Road	1981	0	0	5262	667740	0	0	319445	0	0	0	0	992447	0	0	0	0	NA	0	992447	0	0	5577.72	707804	0	0	338612	0	0	0	0	1.05199e+06	0	0	0	0	NA	0	1.05199e+06	5577.72	707804	0	338612	0	0	0	0	0
MEX	Road	1982	0	0	7633	673849	0	0	310386	0	0	0	0	991868	0	0	0	0	NA	0	991868	0	0	8090.98	714280	0	0	329009	0	0	0	0	1.05138e+06	0	0	0	0	NA	0	1.05138e+06	8090.98	714280	0	329009	0	0	0	0	0
MEX	Road	1983	0	0	15265	591922	0	0	273400	0	0	0	0	880587	0	0	0	0	NA	0	880587	0	0	16180.9	627437	0	0	289804	0	0	0	0	933422	0	0	0	0	NA	0	933422	16180.9	627437	0	289804	0	0	0	0	0
MEX	Road	1984	0	0	38856	604506	0	0	281061	0	0	0	0	924423	0	0	0	0	NA	0	924423	0	0	41187.4	640776	0	0	297925	0	0	0	0	979888	0	0	0	0	NA	0	979888	41187.4	640776	0	297925	0	0	0	0	0
MEX	Road	1985	0	0	45796	604097	0	0	281023	0	0	0	0	930916	0	0	0	0	NA	0	930916	0	0	48543.8	640343	0	0	297884	0	0	0	0	986771	0	0	0	0	NA	0	986771	48543.8	640343	0	297884	0	0	0	0	0
MEX	Road	1986	0	0	41978	619572	0	0	265717	0	0	0	0	927267	0	0	0	0	NA	0	927267	0	0	44496.7	656746	0	0	281660	0	0	0	0	982903	0	0	0	0	NA	0	982903	44496.7	656746	0	281660	0	0	0	0	0
MEX	Road	1987	0	0	33888	649598	0	0	258033	0	0	0	0	941519	0	0	0	0	NA	0	941519	0	0	35921.3	688574	0	0	273515	0	0	0	0	998010	0	0	0	0	NA	0	998010	35921.3	688574	0	273515	0	0	0	0	0
MEX	Road	1988	0	0	33136	676729	0	0	260893	0	0	0	0	970758	0	0	0	0	NA	0	970758	0	0	35124.2	717333	0	0	276547	0	0	0	0	1.029e+06	0	0	0	0	NA	0	1.029e+06	35124.2	717333	0	276547	0	0	0	0	0
MEX	Road	1989	0	0	34588	758204	0	0	272476	0	0	0	0	1065268	0	0	0	0	NA	0	1065268	0	0	36663.3	803696	0	0	288825	0	0	0	0	1.12918e+06	0	0	0	0	NA	0	1.12918e+06	36663.3	803696	0	288825	0	0	0	0	0
MEX	Road	1990	0	0	15238	837927	0	0	293851	0	0	0	0	1147016	0	0	0	0	NA	0	1147016	0	0	16152.3	888203	0	0	311482	0	0	0	0	1.21584e+06	0	0	0	0	NA	0	1.21584e+06	16152.3	888203	0	311482	0	0	0	0	0
MEX	Road	1991	0	0	16073	902908	0	0	310627	0	0	0	0	1229608	0	0	0	0	NA	0	1229608	0	0	17037.4	957082	0	0	329265	0	0	0	0	1.30338e+06	0	0	0	0	NA	0	1.30338e+06	17037.4	957082	0	329265	0	0	0	0	0
MEX	Road	1992	0	0	17521	912763	0	0	315047	0	0	0	0	1245331	0	0	0	0	NA	0	1245331	0	0	18572.3	967529	0	0	333950	0	0	0	0	1.32005e+06	0	0	0	0	NA	0	1.32005e+06	18572.3	967529	0	333950	0	0	0	0	0
MEX	Road	1993	0	0	17680	930289	0	0	326191	0	0	0	0	1274160	0	0	0	0	NA	0	1274160	0	0	18740.8	986106	0	0	345762	0	0	0	0	1.35061e+06	0	0	0	0	NA	0	1.35061e+06	18740.8	986106	0	345762	0	0	0	0	0
MEX	Road	1994	0	0	17872	955251	0	0	342236	0	0	0	0	1315359	0	0	0	0	NA	0	1315359	0	0	18944.3	1.01257e+06	0	0	362770	0	0	0	0	1.39428e+06	0	0	0	0	NA	0	1.39428e+06	18944.3	1.01257e+06	0	362770	0	0	0	0	0
MEX	Road	1995	0	0	18557	928896	0	0	305998	0	0	0	0	1253451	0	0	0	0	NA	0	1253451	0	0	19670.4	984630	0	0	324358	0	0	0	0	1.32866e+06	0	0	0	0	NA	0	1.32866e+06	19670.4	984630	0	324358	0	0	0	0	0
MEX	Road	1996	0	0	19179	929091	0	0	325922	0	0	0	0	1274192	0	0	0	0	NA	0	1274192	0	0	20329.7	984836	0	0	345477	0	0	0	0	1.35064e+06	0	0	0	0	NA	0	1.35064e+06	20329.7	984836	0	345477	0	0	0	0	0
MEX	Road	1997	0	0	19067	958057	0	0	344120	0	0	0	0	1321244	0	0	0	0	NA	0	1321244	0	0	20211	1.01554e+06	0	0	364767	0	0	0	0	1.40052e+06	0	0	0	0	NA	0	1.40052e+06	20211	1.01554e+06	0	364767	0	0	0	0	0
MEX	Road	1998	0	0	19706	983185	0	0	354984	0	0	0	0	1357875	0	0	0	0	NA	0	1357875	0	0	20888.4	1.04218e+06	0	0	376283	0	0	0	0	1.43935e+06	0	0	0	0	NA	0	1.43935e+06	20888.4	1.04218e+06	0	376283	0	0	0	0	0
MEX	Road	1999	0	0	35344	956382	0	0	365357	0	0	0	0	1357083	0	9	0	0	NA	0	1357092	0	0	37464.6	1.01376e+06	0	0	387278	0	0	0	0	1.43851e+06	0	9.36	0	0	NA	0	1.43852e+06	37464.6	1.01376e+06	0	387278	0	9.36	0	0	0
MEX	Road	2000	0	0	45240	997230	0	0	373240	0	0	0	0	1415710	0	258	0	0	NA	0	1415968	0	0	47954.4	1.05706e+06	0	0	395634	0	0	0	0	1.50065e+06	0	268.32	0	0	NA	0	1.50092e+06	47954.4	1.05706e+06	0	395634	0	268.32	0	0	0
MEX	Road	2001	0	0	48310	1015080	0	0	363610	0	0	0	0	1427000	0	546	0	0	NA	0	1427546	0	0	51208.6	1.07598e+06	0	0	385427	0	0	0	0	1.51262e+06	0	567.84	0	0	NA	0	1.51319e+06	51208.6	1.07598e+06	0	385427	0	567.84	0	0	0
MEX	Road	2002	0	0	53760	1042050	0	0	368980	0	0	0	0	1464790	0	716	0	0	NA	0	1465506	0	0	56985.6	1104573	0	0	391119	0	0	0	0	1.55268e+06	0	744.64	0	0	NA	0	1.55342e+06	56985.6	1104573	0	391119	0	744.64	0	0	0
MEX	Road	2003	0	0	57190	1064590	0	0	395620	0	0	0	0	1517400	0	803	0	0	NA	0	1518203	0	0	60621.4	1.12847e+06	0	0	419357	0	0	0	0	1608444	0	835.12	0	0	NA	0	1.60928e+06	60621.4	1.12847e+06	0	419357	0	835.12	0	0	0
MEX	Road	2004	0	0	57310	1240870	0	0	434170	0	0	0	0	1732350	0	808	0	0	NA	0	1733158	0	0	60748.6	1.31532e+06	0	0	460220	0	0	0	0	1836291	0	840.32	0	0	NA	0	1.83713e+06	60748.6	1.31532e+06	0	460220	0	840.32	0	0	0
MEX	Road	2005	0	0	48690	1194050	0	0	437780	0	0	0	0	1680520	0	760	0	0	NA	0	1681280	0	0	51611.4	1265693	0	0	464047	0	0	0	0	1.78135e+06	0	790.4	0	0	NA	0	1.78214e+06	51611.4	1265693	0	464047	0	790.4	0	0	0
MEX	Road	2006	0	0	38580	1277280	0	0	469150	0	0	0	0	1785010	0	810	0	0	NA	0	1785820	0	0	40894.8	1.35392e+06	0	0	497299	0	0	0	0	1.89211e+06	0	842.4	0	0	NA	0	1892953	40894.8	1.35392e+06	0	497299	0	842.4	0	0	0
MEX	Road	2007	0	0	46450	1394470	0	0	518000	0	0	0	0	1958920	0	732	0	0	NA	0	1959652	0	0	49237	1.47814e+06	0	0	549080	0	0	0	0	2.07646e+06	0	761.28	0	0	NA	0	2.07722e+06	49237	1.47814e+06	0	549080	0	761.28	0	0	0
MEX	Road	2008	0	0	43960	1606470	0	0	581270	0	0	0	0	2231700	0	651	0	0	NA	0	2232351	0	0	46597.6	1.70286e+06	0	0	616146	0	0	0	0	2.3656e+06	0	677.04	0	0	NA	0	2.36628e+06	46597.6	1.70286e+06	0	616146	0	677.04	0	0	0
MEX	Road	2009	0	0	40670	1497820	0	0	518870	0	0	0	0	2057360	0	591	0	0	NA	0	2057951	0	0	43110.2	1.58769e+06	0	0	550002	0	0	0	0	2.1808e+06	0	614.64	0	0	NA	0	2.18142e+06	43110.2	1.58769e+06	0	550002	0	614.64	0	0	0
MEX	Rail	1971	0	0	0	0	0	0	12807	0	0	0	0	12807	0	0	0	879	NA	0	13686	0	0	0	0	0	0	13575.4	0	0	0	0	13575.4	0	0	0	879	NA	0	14454.4	0	0	0	13575.4	0	0	879	0	0
MEX	Rail	1972	0	0	0	0	0	0	13523	0	0	0	0	13523	0	0	0	1063	NA	0	14586	0	0	0	0	0	0	14334.4	0	0	0	0	14334.4	0	0	0	1063	NA	0	15397.4	0	0	0	14334.4	0	0	1063	0	0
MEX	Rail	1973	0	0	0	0	0	0	13909	0	0	0	0	13909	0	0	0	1281	NA	0	15190	0	0	0	0	0	0	14743.5	0	0	0	0	14743.5	0	0	0	1281	NA	0	16024.5	0	0	0	14743.5	0	0	1281	0	0
MEX	Rail	1974	0	0	0	0	0	0	15337	0	0	0	0	15337	0	0	0	1293	NA	0	16630	0	0	0	0	0	0	16257.2	0	0	0	0	16257.2	0	0	0	1293	NA	0	17550.2	0	0	0	16257.2	0	0	1293	0	0
MEX	Rail	1975	0	0	0	0	0	0	16705	0	0	0	0	16705	0	0	0	1302	NA	0	18007	0	0	0	0	0	0	17707.3	0	0	0	0	17707.3	0	0	0	1302	NA	0	19009.3	0	0	0	17707.3	0	0	1302	0	0
MEX	Rail	1976	0	0	0	0	0	0	16495	0	0	0	0	16495	0	0	0	1260	NA	0	17755	0	0	0	0	0	0	17484.7	0	0	0	0	17484.7	0	0	0	1260	NA	0	18744.7	0	0	0	17484.7	0	0	1260	0	0
MEX	Rail	1977	0	0	0	0	0	0	16753	0	0	0	0	16753	0	0	0	1340	NA	0	18093	0	0	0	0	0	0	17758.2	0	0	0	0	17758.2	0	0	0	1340	NA	0	19098.2	0	0	0	17758.2	0	0	1340	0	0
MEX	Rail	1978	0	0	0	0	0	0	18181	0	0	0	0	18181	0	0	0	1511	NA	0	19692	0	0	0	0	0	0	19271.9	0	0	0	0	19271.9	0	0	0	1511	NA	0	20782.9	0	0	0	19271.9	0	0	1511	0	0
MEX	Rail	1979	0	0	0	0	0	0	17970	0	0	0	0	17970	0	0	0	1482	NA	0	19452	0	0	0	0	0	0	19048.2	0	0	0	0	19048.2	0	0	0	1482	NA	0	20530.2	0	0	0	19048.2	0	0	1482	0	0
MEX	Rail	1980	0	0	0	0	0	0	21291	0	0	0	0	21291	0	0	0	1561	NA	0	22852	0	0	0	0	0	0	22568.5	0	0	0	0	22568.5	0	0	0	1561	NA	0	24129.5	0	0	0	22568.5	0	0	1561	0	0
MEX	Rail	1981	0	0	0	0	0	0	20910	0	0	0	0	20910	0	0	0	1641	NA	0	22551	0	0	0	0	0	0	22164.6	0	0	0	0	22164.6	0	0	0	1641	NA	0	23805.6	0	0	0	22164.6	0	0	1641	0	0
MEX	Rail	1982	0	0	0	0	0	0	18957	0	0	0	0	18957	0	0	0	1616	NA	0	20573	0	0	0	0	0	0	20094.4	0	0	0	0	20094.4	0	0	0	1616	NA	0	21710.4	0	0	0	20094.4	0	0	1616	0	0
MEX	Rail	1983	0	0	0	0	0	0	21204	0	0	0	0	21204	0	0	0	1896	NA	0	23100	0	0	0	0	0	0	22476.2	0	0	0	0	22476.2	0	0	0	1896	NA	0	24372.2	0	0	0	22476.2	0	0	1896	0	0
MEX	Rail	1984	0	0	0	0	0	0	23769	0	0	0	0	23769	0	0	0	2239	NA	0	26008	0	0	0	0	0	0	25195.1	0	0	0	0	25195.1	0	0	0	2239	NA	0	27434.1	0	0	0	25195.1	0	0	2239	0	0
MEX	Rail	1985	0	0	0	0	0	0	24891	0	0	0	0	24891	0	0	0	2340	NA	0	27231	0	0	0	0	0	0	26384.5	0	0	0	0	26384.5	0	0	0	2340	NA	0	28724.5	0	0	0	26384.5	0	0	2340	0	0
MEX	Rail	1986	0	0	0	0	0	0	23197	0	0	0	0	23197	0	0	0	2574	NA	0	25771	0	0	0	0	0	0	24588.8	0	0	0	0	24588.8	0	0	0	2574	NA	0	27162.8	0	0	0	24588.8	0	0	2574	0	0
MEX	Rail	1987	0	0	0	0	0	0	33069	0	0	0	0	33069	0	0	0	2704	NA	0	35773	0	0	0	0	0	0	35053.1	0	0	0	0	35053.1	0	0	0	2704	NA	0	37757.1	0	0	0	35053.1	0	0	2704	0	0
MEX	Rail	1988	0	0	0	0	0	0	22445	0	0	0	0	22445	0	0	0	2842	NA	0	25287	0	0	0	0	0	0	23791.7	0	0	0	0	23791.7	0	0	0	2842	NA	0	26633.7	0	0	0	23791.7	0	0	2842	0	0
MEX	Rail	1989	0	0	0	0	0	0	27675	0	0	0	0	27675	0	0	0	2779	NA	0	30454	0	0	0	0	0	0	29335.5	0	0	0	0	29335.5	0	0	0	2779	NA	0	32114.5	0	0	0	29335.5	0	0	2779	0	0
MEX	Rail	1990	0	0	0	0	0	0	26649	0	0	0	0	26649	0	0	0	2708	NA	0	29357	0	0	0	0	0	0	28247.9	0	0	0	0	28247.9	0	0	0	2708	NA	0	30955.9	0	0	0	28247.9	0	0	2708	0	0
MEX	Rail	1991	0	0	0	0	0	0	22306	0	0	0	0	22306	0	0	0	2901	NA	0	25207	0	0	0	0	0	0	23644.4	0	0	0	0	23644.4	0	0	0	2901	NA	0	26545.4	0	0	0	23644.4	0	0	2901	0	0
MEX	Rail	1992	0	0	0	0	0	0	22489	0	0	0	0	22489	0	0	0	3144	NA	0	25633	0	0	0	0	0	0	23838.3	0	0	0	0	23838.3	0	0	0	3144	NA	0	26982.3	0	0	0	23838.3	0	0	3144	0	0
MEX	Rail	1993	0	0	0	0	0	0	22739	0	0	0	0	22739	0	0	0	3219	NA	0	25958	0	0	0	0	0	0	24103.3	0	0	0	0	24103.3	0	0	0	3219	NA	0	27322.3	0	0	0	24103.3	0	0	3219	0	0
MEX	Rail	1994	0	0	0	0	0	0	25604	0	0	0	0	25604	0	0	0	3388	NA	0	28992	0	0	0	0	0	0	27140.2	0	0	0	0	27140.2	0	0	0	3388	NA	0	30528.2	0	0	0	27140.2	0	0	3388	0	0
MEX	Rail	1995	0	0	0	0	0	0	22585	0	0	0	0	22585	0	0	0	3529	NA	0	26114	0	0	0	0	0	0	23940.1	0	0	0	0	23940.1	0	0	0	3529	NA	0	27469.1	0	0	0	23940.1	0	0	3529	0	0
MEX	Rail	1996	0	0	0	0	0	0	24191	0	0	0	0	24191	0	0	0	3573	NA	0	27764	0	0	0	0	0	0	25642.5	0	0	0	0	25642.5	0	0	0	3573	NA	0	29215.5	0	0	0	25642.5	0	0	3573	0	0
MEX	Rail	1997	0	0	0	0	0	0	27831	0	0	0	0	27831	0	0	0	3588	NA	0	31419	0	0	0	0	0	0	29500.9	0	0	0	0	29500.9	0	0	0	3588	NA	0	33088.9	0	0	0	29500.9	0	0	3588	0	0
MEX	Rail	1998	0	0	0	0	0	0	23243	0	0	0	0	23243	0	0	0	3600	NA	0	26843	0	0	0	0	0	0	24637.6	0	0	0	0	24637.6	0	0	0	3600	NA	0	28237.6	0	0	0	24637.6	0	0	3600	0	0
MEX	Rail	1999	0	0	0	0	0	0	21868	0	0	0	0	21868	0	0	0	3645	NA	0	25513	0	0	0	0	0	0	23180.1	0	0	0	0	23180.1	0	0	0	3645	NA	0	26825.1	0	0	0	23180.1	0	0	3645	0	0
MEX	Rail	2000	0	0	0	0	0	0	22550	0	0	0	0	22550	0	0	0	3860	NA	0	26410	0	0	0	0	0	0	23903	0	0	0	0	23903	0	0	0	3860	NA	0	27763	0	0	0	23903	0	0	3860	0	0
MEX	Rail	2001	0	0	0	0	0	0	20670	0	0	0	0	20670	0	0	0	3980	NA	0	24650	0	0	0	0	0	0	21910.2	0	0	0	0	21910.2	0	0	0	3980	NA	0	25890.2	0	0	0	21910.2	0	0	3980	0	0
MEX	Rail	2002	0	0	0	0	0	0	21270	0	0	0	0	21270	0	0	0	3940	NA	0	25210	0	0	0	0	0	0	22546.2	0	0	0	0	22546.2	0	0	0	3940	NA	0	26486.2	0	0	0	22546.2	0	0	3940	0	0
MEX	Rail	2003	0	0	0	0	0	0	21860	0	0	0	0	21860	0	0	0	3870	NA	0	25730	0	0	0	0	0	0	23171.6	0	0	0	0	23171.6	0	0	0	3870	NA	0	27041.6	0	0	0	23171.6	0	0	3870	0	0
MEX	Rail	2004	0	0	0	0	0	0	24310	0	0	0	0	24310	0	0	0	3800	NA	0	28110	0	0	0	0	0	0	25768.6	0	0	0	0	25768.6	0	0	0	3800	NA	0	29568.6	0	0	0	25768.6	0	0	3800	0	0
MEX	Rail	2005	0	0	0	0	0	0	23400	0	0	0	0	23400	0	0	0	3800	NA	0	27200	0	0	0	0	0	0	24804	0	0	0	0	24804	0	0	0	3800	NA	0	28604	0	0	0	24804	0	0	3800	0	0
MEX	Rail	2006	0	0	0	0	0	0	24920	0	0	0	0	24920	0	0	0	3790	NA	0	28710	0	0	0	0	0	0	26415.2	0	0	0	0	26415.2	0	0	0	3790	NA	0	30205.2	0	0	0	26415.2	0	0	3790	0	0
MEX	Rail	2007	0	0	0	0	0	0	26330	0	0	0	0	26330	0	0	0	3790	NA	0	30120	0	0	0	0	0	0	27909.8	0	0	0	0	27909.8	0	0	0	3790	NA	0	31699.8	0	0	0	27909.8	0	0	3790	0	0
MEX	Rail	2008	0	0	0	0	0	0	26180	0	0	0	0	26180	0	0	0	3860	NA	0	30040	0	0	0	0	0	0	27750.8	0	0	0	0	27750.8	0	0	0	3860	NA	0	31610.8	0	0	0	27750.8	0	0	3860	0	0
MEX	Rail	2009	0	0	0	0	0	0	23760	0	0	0	0	23760	0	0	0	3860	NA	0	27620	0	0	0	0	0	0	25185.6	0	0	0	0	25185.6	0	0	0	3860	NA	0	29045.6	0	0	0	25185.6	0	0	3860	0	0
MEX	Domestic.navigation	1971	0	0	0	0	0	0	673	3162	0	0	0	3835	0	0	0	0	NA	0	3835	0	0	0	0	0	0	713.38	3351.72	0	0	0	4065.1	0	0	0	0	NA	0	4065.1	0	0	0	713.38	3351.72	0	0	0	0
MEX	Domestic.navigation	1972	0	0	0	0	0	0	756	3643	0	0	0	4399	0	0	0	0	NA	0	4399	0	0	0	0	0	0	801.36	3861.58	0	0	0	4662.94	0	0	0	0	NA	0	4662.94	0	0	0	801.36	3861.58	0	0	0	0
MEX	Domestic.navigation	1973	0	0	0	0	0	0	849	4316	0	0	0	5165	0	0	0	0	NA	0	5165	0	0	0	0	0	0	899.94	4574.96	0	0	0	5474.9	0	0	0	0	NA	0	5474.9	0	0	0	899.94	4574.96	0	0	0	0
MEX	Domestic.navigation	1974	0	0	0	0	0	0	953	4554	0	0	0	5507	0	0	0	0	NA	0	5507	0	0	0	0	0	0	1010.18	4827.24	0	0	0	5837.42	0	0	0	0	NA	0	5837.42	0	0	0	1010.18	4827.24	0	0	0	0
MEX	Domestic.navigation	1975	0	0	0	0	0	0	1046	4745	0	0	0	5791	0	0	0	0	NA	0	5791	0	0	0	0	0	0	1108.76	5029.7	0	0	0	6138.46	0	0	0	0	NA	0	6138.46	0	0	0	1108.76	5029.7	0	0	0	0
MEX	Domestic.navigation	1976	0	0	0	0	0	0	1174	6475	0	0	0	7649	0	0	0	0	NA	0	7649	0	0	0	0	0	0	1244.44	6863.5	0	0	0	8107.94	0	0	0	0	NA	0	8107.94	0	0	0	1244.44	6863.5	0	0	0	0
MEX	Domestic.navigation	1977	0	0	0	0	0	0	1319	7557	0	0	0	8876	0	0	0	0	NA	0	8876	0	0	0	0	0	0	1398.14	8010.42	0	0	0	9408.56	0	0	0	0	NA	0	9408.56	0	0	0	1398.14	8010.42	0	0	0	0
MEX	Domestic.navigation	1978	0	0	0	0	0	0	1481	11626	0	0	0	13107	0	0	0	0	NA	0	13107	0	0	0	0	0	0	1569.86	12323.6	0	0	0	13893.4	0	0	0	0	NA	0	13893.4	0	0	0	1569.86	12323.6	0	0	0	0
MEX	Domestic.navigation	1979	0	0	0	0	0	0	1663	12063	0	0	0	13726	0	0	0	0	NA	0	13726	0	0	0	0	0	0	1762.78	12786.8	0	0	0	14549.6	0	0	0	0	NA	0	14549.6	0	0	0	1762.78	12786.8	0	0	0	0
MEX	Domestic.navigation	1980	0	0	0	0	0	0	1824	12418	0	0	0	14242	0	0	0	0	NA	0	14242	0	0	0	0	0	0	1933.44	13163.1	0	0	0	15096.5	0	0	0	0	NA	0	15096.5	0	0	0	1933.44	13163.1	0	0	0	0
MEX	Domestic.navigation	1981	0	0	0	0	0	0	2049	13153	0	0	0	15202	0	0	0	0	NA	0	15202	0	0	0	0	0	0	2171.94	13942.2	0	0	0	16114.1	0	0	0	0	NA	0	16114.1	0	0	0	2171.94	13942.2	0	0	0	0
MEX	Domestic.navigation	1982	0	0	0	0	0	0	2301	11654	0	0	0	13955	0	0	0	0	NA	0	13955	0	0	0	0	0	0	2439.06	12353.2	0	0	0	14792.3	0	0	0	0	NA	0	14792.3	0	0	0	2439.06	12353.2	0	0	0	0
MEX	Domestic.navigation	1983	0	0	0	0	0	0	2584	11586	0	0	0	14170	0	0	0	0	NA	0	14170	0	0	0	0	0	0	2739.04	12281.2	0	0	0	15020.2	0	0	0	0	NA	0	15020.2	0	0	0	2739.04	12281.2	0	0	0	0
MEX	Domestic.navigation	1984	0	0	0	0	0	0	2902	16304	0	0	0	19206	0	0	0	0	NA	0	19206	0	0	0	0	0	0	3076.12	17282.2	0	0	0	20358.4	0	0	0	0	NA	0	20358.4	0	0	0	3076.12	17282.2	0	0	0	0
MEX	Domestic.navigation	1985	0	0	0	0	0	0	2923	16502	0	0	0	19425	0	0	0	0	NA	0	19425	0	0	0	0	0	0	3098.38	17492.1	0	0	0	20590.5	0	0	0	0	NA	0	20590.5	0	0	0	3098.38	17492.1	0	0	0	0
MEX	Domestic.navigation	1986	0	0	0	0	0	0	2864	17170	0	0	0	20034	0	0	0	0	NA	0	20034	0	0	0	0	0	0	3035.84	18200.2	0	0	0	21236	0	0	0	0	NA	0	21236	0	0	0	3035.84	18200.2	0	0	0	0
MEX	Domestic.navigation	1987	0	0	0	0	0	0	3751	16650	0	0	0	20401	0	0	0	0	NA	0	20401	0	0	0	0	0	0	3976.06	17649	0	0	0	21625.1	0	0	0	0	NA	0	21625.1	0	0	0	3976.06	17649	0	0	0	0
MEX	Domestic.navigation	1988	0	0	0	0	0	0	4145	16232	0	0	0	20377	0	0	0	0	NA	0	20377	0	0	0	0	0	0	4393.7	17205.9	0	0	0	21599.6	0	0	0	0	NA	0	21599.6	0	0	0	4393.7	17205.9	0	0	0	0
MEX	Domestic.navigation	1989	0	0	0	0	0	0	4479	17540	0	0	0	22019	0	0	0	0	NA	0	22019	0	0	0	0	0	0	4747.74	18592.4	0	0	0	23340.1	0	0	0	0	NA	0	23340.1	0	0	0	4747.74	18592.4	0	0	0	0
MEX	Domestic.navigation	1990	0	0	0	0	0	0	4717	20691	0	0	0	25408	0	0	0	0	NA	0	25408	0	0	0	0	0	0	5000.02	21932.5	0	0	0	26932.5	0	0	0	0	NA	0	26932.5	0	0	0	5000.02	21932.5	0	0	0	0
MEX	Domestic.navigation	1991	0	0	0	0	0	0	11853	17557	0	0	0	29410	0	0	0	0	NA	0	29410	0	0	0	0	0	0	12564.2	18610.4	0	0	0	31174.6	0	0	0	0	NA	0	31174.6	0	0	0	12564.2	18610.4	0	0	0	0
MEX	Domestic.navigation	1992	0	0	0	0	0	0	14466	2422	0	0	0	16888	0	0	0	0	NA	0	16888	0	0	0	0	0	0	15334	2567.32	0	0	0	17901.3	0	0	0	0	NA	0	17901.3	0	0	0	15334	2567.32	0	0	0	0
MEX	Domestic.navigation	1993	0	0	0	0	0	0	12012	1766	0	0	0	13778	0	0	0	0	NA	0	13778	0	0	0	0	0	0	12732.7	1871.96	0	0	0	14604.7	0	0	0	0	NA	0	14604.7	0	0	0	12732.7	1871.96	0	0	0	0
MEX	Domestic.navigation	1994	0	0	0	0	0	0	25462	1682	0	0	0	27144	0	0	0	0	NA	0	27144	0	0	0	0	0	0	26989.7	1782.92	0	0	0	28772.6	0	0	0	0	NA	0	28772.6	0	0	0	26989.7	1782.92	0	0	0	0
MEX	Domestic.navigation	1995	0	0	0	0	0	0	22713	1398	0	0	0	24111	0	0	0	0	NA	0	24111	0	0	0	0	0	0	24075.8	1481.88	0	0	0	25557.7	0	0	0	0	NA	0	25557.7	0	0	0	24075.8	1481.88	0	0	0	0
MEX	Domestic.navigation	1996	0	0	0	0	0	0	22978	1679	0	0	0	24657	0	0	0	0	NA	0	24657	0	0	0	0	0	0	24356.7	1779.74	0	0	0	26136.4	0	0	0	0	NA	0	26136.4	0	0	0	24356.7	1779.74	0	0	0	0
MEX	Domestic.navigation	1997	0	0	0	0	0	0	24732	1687	0	0	0	26419	0	0	0	0	NA	0	26419	0	0	0	0	0	0	26215.9	1788.22	0	0	0	28004.1	0	0	0	0	NA	0	28004.1	0	0	0	26215.9	1788.22	0	0	0	0
MEX	Domestic.navigation	1998	0	0	0	0	0	0	30741	2643	0	0	0	33384	0	0	0	0	NA	0	33384	0	0	0	0	0	0	32585.5	2801.58	0	0	0	35387	0	0	0	0	NA	0	35387	0	0	0	32585.5	2801.58	0	0	0	0
MEX	Domestic.navigation	1999	0	0	0	0	0	0	41567	8424	0	0	0	49991	0	0	0	0	NA	0	49991	0	0	0	0	0	0	44061	8929.44	0	0	0	52990.5	0	0	0	0	NA	0	52990.5	0	0	0	44061	8929.44	0	0	0	0
MEX	Domestic.navigation	2000	0	0	0	0	0	0	43360	12790	0	0	0	56150	0	0	0	0	NA	0	56150	0	0	0	0	0	0	45961.6	13557.4	0	0	0	59519	0	0	0	0	NA	0	59519	0	0	0	45961.6	13557.4	0	0	0	0
MEX	Domestic.navigation	2001	0	0	0	0	0	0	36950	8080	0	0	0	45030	0	0	0	0	NA	0	45030	0	0	0	0	0	0	39167	8564.8	0	0	0	47731.8	0	0	0	0	NA	0	47731.8	0	0	0	39167	8564.8	0	0	0	0
MEX	Domestic.navigation	2002	0	0	0	0	0	0	27620	4760	0	0	0	32380	0	0	0	0	NA	0	32380	0	0	0	0	0	0	29277.2	5045.6	0	0	0	34322.8	0	0	0	0	NA	0	34322.8	0	0	0	29277.2	5045.6	0	0	0	0
MEX	Domestic.navigation	2003	0	0	0	0	0	0	29550	3560	0	0	0	33110	0	0	0	0	NA	0	33110	0	0	0	0	0	0	31323	3773.6	0	0	0	35096.6	0	0	0	0	NA	0	35096.6	0	0	0	31323	3773.6	0	0	0	0
MEX	Domestic.navigation	2004	0	0	0	0	0	0	28500	4130	0	0	0	32630	0	0	0	0	NA	0	32630	0	0	0	0	0	0	30210	4377.8	0	0	0	34587.8	0	0	0	0	NA	0	34587.8	0	0	0	30210	4377.8	0	0	0	0
MEX	Domestic.navigation	2005	0	0	0	0	0	0	29190	4370	0	0	0	33560	0	0	0	0	NA	0	33560	0	0	0	0	0	0	30941.4	4632.2	0	0	0	35573.6	0	0	0	0	NA	0	35573.6	0	0	0	30941.4	4632.2	0	0	0	0
MEX	Domestic.navigation	2006	0	0	0	0	0	0	29310	5070	0	0	0	34380	0	0	0	0	NA	0	34380	0	0	0	0	0	0	31068.6	5374.2	0	0	0	36442.8	0	0	0	0	NA	0	36442.8	0	0	0	31068.6	5374.2	0	0	0	0
MEX	Domestic.navigation	2007	0	0	0	0	0	0	30070	6640	0	0	0	36710	0	0	0	0	NA	0	36710	0	0	0	0	0	0	31874.2	7038.4	0	0	0	38912.6	0	0	0	0	NA	0	38912.6	0	0	0	31874.2	7038.4	0	0	0	0
MEX	Domestic.navigation	2008	0	0	0	0	0	0	38670	5770	0	0	0	44440	0	0	0	0	NA	0	44440	0	0	0	0	0	0	40990.2	6116.2	0	0	0	47106.4	0	0	0	0	NA	0	47106.4	0	0	0	40990.2	6116.2	0	0	0	0
MEX	Domestic.navigation	2009	0	0	0	0	0	0	26560	4770	0	0	0	31330	0	0	0	0	NA	0	31330	0	0	0	0	0	0	28153.6	5056.2	0	0	0	33209.8	0	0	0	0	NA	0	33209.8	0	0	0	28153.6	5056.2	0	0	0	0
MEX	Domestic.aviation	1971	0	0	0	1641	18650	0	0	0	0	0	0	20291	0	0	0	0	NA	0	20291	0	0	0	1739.46	19769	0	0	0	0	0	0	21508.5	0	0	0	0	NA	0	21508.5	0	1739.46	19769	0	0	0	0	0	0
MEX	Domestic.aviation	1972	0	0	0	1796	21514	0	0	0	0	0	0	23310	0	0	0	0	NA	0	23310	0	0	0	1903.76	22804.8	0	0	0	0	0	0	24708.6	0	0	0	0	NA	0	24708.6	0	1903.76	22804.8	0	0	0	0	0	0
MEX	Domestic.aviation	1973	0	0	0	1738	24843	0	0	0	0	0	0	26581	0	0	0	0	NA	0	26581	0	0	0	1842.28	26333.6	0	0	0	0	0	0	28175.9	0	0	0	0	NA	0	28175.9	0	1842.28	26333.6	0	0	0	0	0	0
MEX	Domestic.aviation	1974	0	0	0	1643	33017	0	0	0	0	0	0	34660	0	0	0	0	NA	0	34660	0	0	0	1741.58	34998	0	0	0	0	0	0	36739.6	0	0	0	0	NA	0	36739.6	0	1741.58	34998	0	0	0	0	0	0
MEX	Domestic.aviation	1975	0	0	0	1699	32162	0	0	0	0	0	0	33861	0	0	0	0	NA	0	33861	0	0	0	1800.94	34091.7	0	0	0	0	0	0	35892.7	0	0	0	0	NA	0	35892.7	0	1800.94	34091.7	0	0	0	0	0	0
MEX	Domestic.aviation	1976	0	0	0	1776	37277	0	0	0	0	0	0	39053	0	0	0	0	NA	0	39053	0	0	0	1882.56	39513.6	0	0	0	0	0	0	41396.2	0	0	0	0	NA	0	41396.2	0	1882.56	39513.6	0	0	0	0	0	0
MEX	Domestic.aviation	1977	0	0	0	1429	39329	0	0	0	0	0	0	40758	0	0	0	0	NA	0	40758	0	0	0	1514.74	41688.7	0	0	0	0	0	0	43203.5	0	0	0	0	NA	0	43203.5	0	1514.74	41688.7	0	0	0	0	0	0
MEX	Domestic.aviation	1978	0	0	0	1834	41135	0	0	0	0	0	0	42969	0	0	0	0	NA	0	42969	0	0	0	1944.04	43603.1	0	0	0	0	0	0	45547.1	0	0	0	0	NA	0	45547.1	0	1944.04	43603.1	0	0	0	0	0	0
MEX	Domestic.aviation	1979	0	0	0	2064	50187	0	0	0	0	0	0	52251	0	0	0	0	NA	0	52251	0	0	0	2187.84	53198.2	0	0	0	0	0	0	55386.1	0	0	0	0	NA	0	55386.1	0	2187.84	53198.2	0	0	0	0	0	0
MEX	Domestic.aviation	1980	0	0	0	2048	56818	0	0	0	0	0	0	58866	0	0	0	0	NA	0	58866	0	0	0	2170.88	60227.1	0	0	0	0	0	0	62398	0	0	0	0	NA	0	62398	0	2170.88	60227.1	0	0	0	0	0	0
MEX	Domestic.aviation	1981	0	0	0	2124	58831	0	0	0	0	0	0	60955	0	0	0	0	NA	0	60955	0	0	0	2251.44	62360.9	0	0	0	0	0	0	64612.3	0	0	0	0	NA	0	64612.3	0	2251.44	62360.9	0	0	0	0	0	0
MEX	Domestic.aviation	1982	0	0	0	1949	57363	0	0	0	0	0	0	59312	0	0	0	0	NA	0	59312	0	0	0	2065.94	60804.8	0	0	0	0	0	0	62870.7	0	0	0	0	NA	0	62870.7	0	2065.94	60804.8	0	0	0	0	0	0
MEX	Domestic.aviation	1983	0	0	0	1392	55978	0	0	0	0	0	0	57370	0	0	0	0	NA	0	57370	0	0	0	1475.52	59336.7	0	0	0	0	0	0	60812.2	0	0	0	0	NA	0	60812.2	0	1475.52	59336.7	0	0	0	0	0	0
MEX	Domestic.aviation	1984	0	0	0	1392	58269	0	0	0	0	0	0	59661	0	0	0	0	NA	0	59661	0	0	0	1475.52	61765.1	0	0	0	0	0	0	63240.7	0	0	0	0	NA	0	63240.7	0	1475.52	61765.1	0	0	0	0	0	0
MEX	Domestic.aviation	1985	0	0	0	2032	60819	0	0	0	0	0	0	62851	0	0	0	0	NA	0	62851	0	0	0	2153.92	64468.1	0	0	0	0	0	0	66622.1	0	0	0	0	NA	0	66622.1	0	2153.92	64468.1	0	0	0	0	0	0
MEX	Domestic.aviation	1986	0	0	0	2550	58294	0	0	0	0	0	0	60844	0	0	0	0	NA	0	60844	0	0	0	2703	61791.6	0	0	0	0	0	0	64494.6	0	0	0	0	NA	0	64494.6	0	2703	61791.6	0	0	0	0	0	0
MEX	Domestic.aviation	1987	0	0	0	1814	60203	0	0	0	0	0	0	62017	0	0	0	0	NA	0	62017	0	0	0	1922.84	63815.2	0	0	0	0	0	0	65738	0	0	0	0	NA	0	65738	0	1922.84	63815.2	0	0	0	0	0	0
MEX	Domestic.aviation	1988	0	0	0	1806	54098	0	0	0	0	0	0	55904	0	0	0	0	NA	0	55904	0	0	0	1914.36	57343.9	0	0	0	0	0	0	59258.2	0	0	0	0	NA	0	59258.2	0	1914.36	57343.9	0	0	0	0	0	0
MEX	Domestic.aviation	1989	0	0	0	1754	64165	0	0	0	0	0	0	65919	0	0	0	0	NA	0	65919	0	0	0	1859.24	68014.9	0	0	0	0	0	0	69874.1	0	0	0	0	NA	0	69874.1	0	1859.24	68014.9	0	0	0	0	0	0
MEX	Domestic.aviation	1990	0	0	0	1663	71869	0	0	0	0	0	0	73532	0	0	0	0	NA	0	73532	0	0	0	1762.78	76181.1	0	0	0	0	0	0	77943.9	0	0	0	0	NA	0	77943.9	0	1762.78	76181.1	0	0	0	0	0	0
MEX	Domestic.aviation	1991	0	0	0	1706	74561	0	0	0	0	0	0	76267	0	0	0	0	NA	0	76267	0	0	0	1808.36	79034.7	0	0	0	0	0	0	80843	0	0	0	0	NA	0	80843	0	1808.36	79034.7	0	0	0	0	0	0
MEX	Domestic.aviation	1992	0	0	0	1448	83303	0	0	0	0	0	0	84751	0	0	0	0	NA	0	84751	0	0	0	1534.88	88301.2	0	0	0	0	0	0	89836.1	0	0	0	0	NA	0	89836.1	0	1534.88	88301.2	0	0	0	0	0	0
MEX	Domestic.aviation	1993	0	0	0	1161	88276	0	0	0	0	0	0	89437	0	0	0	0	NA	0	89437	0	0	0	1230.66	93572.6	0	0	0	0	0	0	94803.2	0	0	0	0	NA	0	94803.2	0	1230.66	93572.6	0	0	0	0	0	0
MEX	Domestic.aviation	1994	0	0	0	1404	98832	0	0	0	0	0	0	100236	0	0	0	0	NA	0	100236	0	0	0	1488.24	104762	0	0	0	0	0	0	106250	0	0	0	0	NA	0	106250	0	1488.24	104762	0	0	0	0	0	0
MEX	Domestic.aviation	1995	0	0	0	3878	91528	0	0	0	0	0	0	95406	0	0	0	0	NA	0	95406	0	0	0	4110.68	97019.7	0	0	0	0	0	0	101130	0	0	0	0	NA	0	101130	0	4110.68	97019.7	0	0	0	0	0	0
MEX	Domestic.aviation	1996	0	0	0	1137	91076	0	0	0	0	0	0	92213	0	0	0	0	NA	0	92213	0	0	0	1205.22	96540.6	0	0	0	0	0	0	97745.8	0	0	0	0	NA	0	97745.8	0	1205.22	96540.6	0	0	0	0	0	0
MEX	Domestic.aviation	1997	0	0	0	1079	97981	0	0	0	0	0	0	99060	0	0	0	0	NA	0	99060	0	0	0	1143.74	103860	0	0	0	0	0	0	105004	0	0	0	0	NA	0	105004	0	1143.74	103860	0	0	0	0	0	0
MEX	Domestic.aviation	1998	0	0	0	1040	108119	0	0	0	0	0	0	109159	0	0	0	0	NA	0	109159	0	0	0	1102.4	114606	0	0	0	0	0	0	115709	0	0	0	0	NA	0	115709	0	1102.4	114606	0	0	0	0	0	0
MEX	Domestic.aviation	1999	0	0	0	942	114394	0	0	0	0	0	0	115336	0	0	0	0	NA	0	115336	0	0	0	998.52	121258	0	0	0	0	0	0	122256	0	0	0	0	NA	0	122256	0	998.52	121258	0	0	0	0	0	0
MEX	Domestic.aviation	2000	0	0	0	830	115110	0	0	0	0	0	0	115940	0	0	0	0	NA	0	115940	0	0	0	879.8	122017	0	0	0	0	0	0	122896	0	0	0	0	NA	0	122896	0	879.8	122017	0	0	0	0	0	0
MEX	Domestic.aviation	2001	0	0	0	900	113020	0	0	0	0	0	0	113920	0	0	0	0	NA	0	113920	0	0	0	954	119801	0	0	0	0	0	0	120755	0	0	0	0	NA	0	120755	0	954	119801	0	0	0	0	0	0
MEX	Domestic.aviation	2002	0	0	0	940	108890	0	0	0	0	0	0	109830	0	0	0	0	NA	0	109830	0	0	0	996.4	115423	0	0	0	0	0	0	116420	0	0	0	0	NA	0	116420	0	996.4	115423	0	0	0	0	0	0
MEX	Domestic.aviation	2003	0	0	0	940	105830	0	0	0	0	0	0	106770	0	0	0	0	NA	0	106770	0	0	0	996.4	112180	0	0	0	0	0	0	113176	0	0	0	0	NA	0	113176	0	996.4	112180	0	0	0	0	0	0
MEX	Domestic.aviation	2004	0	0	0	960	117010	0	0	0	0	0	0	117970	0	0	0	0	NA	0	117970	0	0	0	1017.6	124031	0	0	0	0	0	0	125048	0	0	0	0	NA	0	125048	0	1017.6	124031	0	0	0	0	0	0
MEX	Domestic.aviation	2005	0	0	0	960	111830	0	0	0	0	0	0	112790	0	0	0	0	NA	0	112790	0	0	0	1017.6	118540	0	0	0	0	0	0	119557	0	0	0	0	NA	0	119557	0	1017.6	118540	0	0	0	0	0	0
MEX	Domestic.aviation	2006	0	0	0	920	116620	0	0	0	0	0	0	117540	0	0	0	0	NA	0	117540	0	0	0	975.2	123617	0	0	0	0	0	0	124592	0	0	0	0	NA	0	124592	0	975.2	123617	0	0	0	0	0	0
MEX	Domestic.aviation	2007	0	0	0	930	133220	0	0	0	0	0	0	134150	0	0	0	0	NA	0	134150	0	0	0	985.8	141213	0	0	0	0	0	0	142199	0	0	0	0	NA	0	142199	0	985.8	141213	0	0	0	0	0	0
MEX	Domestic.aviation	2008	0	0	0	1040	129570	0	0	0	0	0	0	130610	0	0	0	0	NA	0	130610	0	0	0	1102.4	137344	0	0	0	0	0	0	138447	0	0	0	0	NA	0	138447	0	1102.4	137344	0	0	0	0	0	0
MEX	Domestic.aviation	2009	0	0	0	940	109870	0	0	0	0	0	0	110810	0	0	0	0	NA	0	110810	0	0	0	996.4	116462	0	0	0	0	0	0	117459	0	0	0	0	NA	0	117459	0	996.4	116462	0	0	0	0	0	0
MEX	Non.specified.transp	1971	0	0	0	0	0	0	0	0	0	0	0	0	0	0	0	0	NA	0	0	0	0	0	0	0	0	0	0	0	0	0	0	0	0	0	0	NA	0	0	0	0	0	0	0	0	0	0	0
MEX	Non.specified.transp	1972	0	0	0	0	0	0	0	0	0	0	0	0	0	0	0	0	NA	0	0	0	0	0	0	0	0	0	0	0	0	0	0	0	0	0	0	NA	0	0	0	0	0	0	0	0	0	0	0
MEX	Non.specified.transp	1973	0	0	0	0	0	0	0	0	0	0	0	0	0	0	0	0	NA	0	0	0	0	0	0	0	0	0	0	0	0	0	0	0	0	0	0	NA	0	0	0	0	0	0	0	0	0	0	0
MEX	Non.specified.transp	1974	0	0	0	0	0	0	0	0	0	0	0	0	0	0	0	0	NA	0	0	0	0	0	0	0	0	0	0	0	0	0	0	0	0	0	0	NA	0	0	0	0	0	0	0	0	0	0	0
MEX	Non.specified.transp	1975	0	0	0	0	0	0	0	0	0	0	0	0	0	0	0	0	NA	0	0	0	0	0	0	0	0	0	0	0	0	0	0	0	0	0	0	NA	0	0	0	0	0	0	0	0	0	0	0
MEX	Non.specified.transp	1976	0	0	0	0	0	0	0	0	0	0	0	0	0	0	0	0	NA	0	0	0	0	0	0	0	0	0	0	0	0	0	0	0	0	0	0	NA	0	0	0	0	0	0	0	0	0	0	0
MEX	Non.specified.transp	1977	0	0	0	0	0	0	0	0	0	0	0	0	0	0	0	0	NA	0	0	0	0	0	0	0	0	0	0	0	0	0	0	0	0	0	0	NA	0	0	0	0	0	0	0	0	0	0	0
MEX	Non.specified.transp	1978	0	0	0	0	0	0	0	0	0	0	0	0	0	0	0	0	NA	0	0	0	0	0	0	0	0	0	0	0	0	0	0	0	0	0	0	NA	0	0	0	0	0	0	0	0	0	0	0
MEX	Non.specified.transp	1979	0	0	0	0	0	0	0	0	0	0	0	0	0	0	0	0	NA	0	0	0	0	0	0	0	0	0	0	0	0	0	0	0	0	0	0	NA	0	0	0	0	0	0	0	0	0	0	0
MEX	Non.specified.transp	1980	0	0	0	0	0	0	0	0	0	0	0	0	0	0	0	0	NA	0	0	0	0	0	0	0	0	0	0	0	0	0	0	0	0	0	0	NA	0	0	0	0	0	0	0	0	0	0	0
MEX	Non.specified.transp	1981	0	0	0	0	0	0	0	0	0	0	0	0	0	0	0	0	NA	0	0	0	0	0	0	0	0	0	0	0	0	0	0	0	0	0	0	NA	0	0	0	0	0	0	0	0	0	0	0
MEX	Non.specified.transp	1982	0	0	0	0	0	0	0	0	0	0	0	0	0	0	0	0	NA	0	0	0	0	0	0	0	0	0	0	0	0	0	0	0	0	0	0	NA	0	0	0	0	0	0	0	0	0	0	0
MEX	Non.specified.transp	1983	0	0	0	0	0	0	0	0	0	0	0	0	0	0	0	0	NA	0	0	0	0	0	0	0	0	0	0	0	0	0	0	0	0	0	0	NA	0	0	0	0	0	0	0	0	0	0	0
MEX	Non.specified.transp	1984	0	0	0	0	0	0	0	0	0	0	0	0	0	0	0	0	NA	0	0	0	0	0	0	0	0	0	0	0	0	0	0	0	0	0	0	NA	0	0	0	0	0	0	0	0	0	0	0
MEX	Non.specified.transp	1985	0	0	0	0	0	0	0	0	0	0	0	0	0	0	0	0	NA	0	0	0	0	0	0	0	0	0	0	0	0	0	0	0	0	0	0	NA	0	0	0	0	0	0	0	0	0	0	0
MEX	Non.specified.transp	1986	0	0	0	0	0	0	0	0	0	0	0	0	0	0	0	0	NA	0	0	0	0	0	0	0	0	0	0	0	0	0	0	0	0	0	0	NA	0	0	0	0	0	0	0	0	0	0	0
MEX	Non.specified.transp	1987	0	0	0	0	0	0	0	0	0	0	0	0	0	0	0	0	NA	0	0	0	0	0	0	0	0	0	0	0	0	0	0	0	0	0	0	NA	0	0	0	0	0	0	0	0	0	0	0
MEX	Non.specified.transp	1988	0	0	0	0	0	0	0	0	0	0	0	0	0	0	0	0	NA	0	0	0	0	0	0	0	0	0	0	0	0	0	0	0	0	0	0	NA	0	0	0	0	0	0	0	0	0	0	0
MEX	Non.specified.transp	1989	0	0	0	0	0	0	0	0	0	0	0	0	0	0	0	0	NA	0	0	0	0	0	0	0	0	0	0	0	0	0	0	0	0	0	0	NA	0	0	0	0	0	0	0	0	0	0	0
MEX	Non.specified.transp	1990	0	0	0	0	0	0	0	0	0	0	0	0	0	0	0	0	NA	0	0	0	0	0	0	0	0	0	0	0	0	0	0	0	0	0	0	NA	0	0	0	0	0	0	0	0	0	0	0
MEX	Non.specified.transp	1991	0	0	0	0	0	0	0	0	0	0	0	0	0	0	0	0	NA	0	0	0	0	0	0	0	0	0	0	0	0	0	0	0	0	0	0	NA	0	0	0	0	0	0	0	0	0	0	0
MEX	Non.specified.transp	1992	0	0	0	0	0	0	0	0	0	0	0	0	0	0	0	0	NA	0	0	0	0	0	0	0	0	0	0	0	0	0	0	0	0	0	0	NA	0	0	0	0	0	0	0	0	0	0	0
MEX	Non.specified.transp	1993	0	0	0	0	0	0	0	0	0	0	0	0	0	0	0	0	NA	0	0	0	0	0	0	0	0	0	0	0	0	0	0	0	0	0	0	NA	0	0	0	0	0	0	0	0	0	0	0
MEX	Non.specified.transp	1994	0	0	0	0	0	0	0	0	0	0	0	0	0	0	0	0	NA	0	0	0	0	0	0	0	0	0	0	0	0	0	0	0	0	0	0	NA	0	0	0	0	0	0	0	0	0	0	0
MEX	Non.specified.transp	1995	0	0	0	0	0	0	0	0	0	0	0	0	0	0	0	0	NA	0	0	0	0	0	0	0	0	0	0	0	0	0	0	0	0	0	0	NA	0	0	0	0	0	0	0	0	0	0	0
MEX	Non.specified.transp	1996	0	0	0	0	0	0	0	0	0	0	0	0	0	0	0	0	NA	0	0	0	0	0	0	0	0	0	0	0	0	0	0	0	0	0	0	NA	0	0	0	0	0	0	0	0	0	0	0
MEX	Non.specified.transp	1997	0	0	0	0	0	0	0	0	0	0	0	0	0	0	0	0	NA	0	0	0	0	0	0	0	0	0	0	0	0	0	0	0	0	0	0	NA	0	0	0	0	0	0	0	0	0	0	0
MEX	Non.specified.transp	1998	0	0	0	0	0	0	0	0	0	0	0	0	0	0	0	0	NA	0	0	0	0	0	0	0	0	0	0	0	0	0	0	0	0	0	0	NA	0	0	0	0	0	0	0	0	0	0	0
MEX	Non.specified.transp	1999	0	0	0	0	0	0	0	0	0	0	0	0	0	0	0	0	NA	0	0	0	0	0	0	0	0	0	0	0	0	0	0	0	0	0	0	NA	0	0	0	0	0	0	0	0	0	0	0
MEX	Non.specified.transp	2000	0	0	0	0	0	0	0	0	0	0	0	0	0	0	0	0	NA	0	0	0	0	0	0	0	0	0	0	0	0	0	0	0	0	0	0	NA	0	0	0	0	0	0	0	0	0	0	0
MEX	Non.specified.transp	2001	0	0	0	0	0	0	0	0	0	0	0	0	0	0	0	0	NA	0	0	0	0	0	0	0	0	0	0	0	0	0	0	0	0	0	0	NA	0	0	0	0	0	0	0	0	0	0	0
MEX	Non.specified.transp	2002	0	0	0	0	0	0	0	0	0	0	0	0	0	0	0	0	NA	0	0	0	0	0	0	0	0	0	0	0	0	0	0	0	0	0	0	NA	0	0	0	0	0	0	0	0	0	0	0
MEX	Non.specified.transp	2003	0	0	0	0	0	0	0	0	0	0	0	0	0	0	0	0	NA	0	0	0	0	0	0	0	0	0	0	0	0	0	0	0	0	0	0	NA	0	0	0	0	0	0	0	0	0	0	0
MEX	Non.specified.transp	2004	0	0	0	0	0	0	0	0	0	0	0	0	0	0	0	0	NA	0	0	0	0	0	0	0	0	0	0	0	0	0	0	0	0	0	0	NA	0	0	0	0	0	0	0	0	0	0	0
MEX	Non.specified.transp	2005	0	0	0	0	0	0	0	0	0	0	0	0	0	0	0	0	NA	0	0	0	0	0	0	0	0	0	0	0	0	0	0	0	0	0	0	NA	0	0	0	0	0	0	0	0	0	0	0
MEX	Non.specified.transp	2006	0	0	0	0	0	0	0	0	0	0	0	0	0	0	0	0	NA	0	0	0	0	0	0	0	0	0	0	0	0	0	0	0	0	0	0	NA	0	0	0	0	0	0	0	0	0	0	0
MEX	Non.specified.transp	2007	0	0	0	0	0	0	0	0	0	0	0	0	0	0	0	0	NA	0	0	0	0	0	0	0	0	0	0	0	0	0	0	0	0	0	0	NA	0	0	0	0	0	0	0	0	0	0	0
MEX	Non.specified.transp	2008	0	0	0	0	0	0	0	0	0	0	0	0	0	0	0	0	NA	0	0	0	0	0	0	0	0	0	0	0	0	0	0	0	0	0	0	NA	0	0	0	0	0	0	0	0	0	0	0
MEX	Non.specified.transp	2009	0	0	0	0	0	0	0	0	0	0	0	0	0	0	0	0	NA	0	0	0	0	0	0	0	0	0	0	0	0	0	0	0	0	0	0	NA	0	0	0	0	0	0	0	0	0	0	0
[truncated: 76 more columns]

## Sheet: UESectoral list
CODE	TYPE	VARIABLE
fencrude	FENERGY	Final energy Oil and oil products _ crude oil (TJ)
fenrefingas	FENERGY	Final energy Oil and oil products _ refined gas (TJ)
fenLPG	FENERGY	Final energy Oil and oil products _ LPG (TJ)
fenmotorgas	FENERGY	Final energy Oil and oil products _ motorgas (TJ)
fenavigas	FENERGY	Final energy Oil and oil products _ avigas (TJ)
fenkeros	FENERGY	Final energy Oil and oil products _ kerosene (TJ)
fendiesel	FENERGY	Final energy Oil and oil products _ diesel (TJ)
fenfueloil	FENERGY	Final energy Oil and oil products _ fuel oil (TJ)
fenbitum	FENERGY	Final energy Oil and oil products _ bitum (TJ)
fenpetrocoke	FENERGY	Final energy Oil and oil products _ petrocoke (TJ)
fennonspecoil	FENERGY	Final energy Oil and oil products _ non specific (TJ)
FEnOil	FENERGY	Final energy Oil and oil products (TJ) [sum of previous variables]
FEnCoal	FENERGY	Final energy Coal and coal products (TJ)
FEnNGas	FENERGY	Final energy Natural gas (TJ)
FEnCombRen	FENERGY	Final energy Combustible renewables (TJ)
FEnElec	FENERGY	Final energy Electricity (TJ)
FEnFoFe	FENERGY	Final energy Food and feed (TJ)
FEnONonConv	FENERGY	Final energy Other non conventional (TJ)
FEnTotal	FENERGY	Final energy Total (TJ)
fexcrude	FEXERGY	Final exergy Oil and oil products _ crude oil (TJ)
fexrefingas	FEXERGY	Final exergy Oil and oil products _ refined gas (TJ)
fexLPG	FEXERGY	Final exergy Oil and oil products _ LPG (TJ)
fexmotorgas	FEXERGY	Final exergy Oil and oil products _ motorgas (TJ)
fexavigas	FEXERGY	Final exergy Oil and oil products _ avigas (TJ)
fexkeros	FEXERGY	Final exergy Oil and oil products _ kerosene (TJ)
fexdiesel	FEXERGY	Final exergy Oil and oil products _ diesel (TJ)
fexfueloil	FEXERGY	Final exergy Oil and oil products _ fuel oil (TJ)
fexbitum	FEXERGY	Final exergy Oil and oil products _ bitum (TJ)
fexpetrocoke	FEXERGY	Final exergy Oil and oil products _ petrocoke (TJ)
fexnonspecoil	FEXERGY	Final exergy Oil and oil products _ non specific (TJ)
FExOil	FEXERGY	Final exergy Oil and oil products (TJ) [sum of previous variables]
FExCoal	FEXERGY	Final exergy Coal and coal products (TJ)
FExNGas	FEXERGY	Final exergy Natural gas (TJ)
FExCombRen	FEXERGY	Final exergy Combustible renewables (TJ)
FExElec	FEXERGY	Final exergy Electricity (TJ)
FExFoFe	FEXERGY	Final exergy Food and feed (TJ)
FExONonConv	FEXERGY	Final exergy Other non conventional (TJ)
FExTotal	FEXERGY	Final exergy Total (TJ)
FexMech_LPG	FEXERGY	Final exergy Mechanical drive _ LPG (TJ)
FexMech_motorgas	FEXERGY	Final exergy Mechanical drive _ motorgas (TJ)
FexMech_avigas	FEXERGY	Final exergy Mechanical drive _ avigas (TJ)
FexMech_diesel	FEXERGY	Final exergy Mechanical drive _ diesel (TJ)
FexMech_fueloil	FEXERGY	Final exergy Mechanical drive _ fueloil (TJ)
FexMech_ngas	FEXERGY	Final exergy Mechanical drive _ natural gas (TJ)
FexMech_elec	FEXERGY	Final exergy Mechanical drive _ electricity (TJ)
FExHeatHigh_oilp	FEXERGY	Final exergy High temperature heat _ oil and oil products (TJ)
FExHeatHigh_coalcp	FEXERGY	Final exergy High temperature heat _ coal and coal products (TJ)
FExHeatHigh_ngas	FEXERGY	Final exergy High temperature heat _ natural gas (TJ)
FExHeatHigh_elec	FEXERGY	Final exergy High temperature heat _ electricity (TJ)
FExHeatMed_oilp	FEXERGY	Final exergy Medium temperature heat _ oil and oil products (TJ)
FExHeatMed_coalcp	FEXERGY	Final exergy Medium temperature heat _ coal and coal products (TJ)
FExHeatMed_ngas	FEXERGY	Final exergy Medium temperature heat _ natural gas (TJ)
FExHeatMed_elec	FEXERGY	Final exergy Medium temperature heat _ electricity (TJ)
FExHeatLow_oilp	FEXERGY	Final exergy Low temperature heat _ oil and oil products (TJ)
FExHeatLow_coalcp	FEXERGY	Final exergy Low temperature heat _ coal and coal products (TJ)
FExHeatLow_ngas	FEXERGY	Final exergy Low temperature heat _ natural gas (TJ)
FExHeatLow_combren	FEXERGY	Final exergy Low temperature heat _ combustible renewables (TJ)
FExHeatLow_elec	FEXERGY	Final exergy Low temperature heat _ electricity (TJ)
FExHeatLow_ononconv	FEXERGY	Final exergy Low temperature heat _ other non conventional (TJ)
FExLight-keros	FEXERGY	Final exergy Lighting _ kerosene (TJ)
FExLight_elec	FEXERGY	Final exergy Lighting _ electricity (TJ)
FExOelec_elec	FEXERGY	Final exergy Other electric uses _ electricity (TJ)
FExMech	FEXERGY	Final exergy Mechanical drive (TJ)
FExHeatHigh	FEXERGY	Final exergy High temperature heat (TJ)
FExHeatMed	FEXERGY	Final exergy Medium temperature heat (TJ)
FExHeatLow	FEXERGY	Final exergy Low temperature heat (TJ)
FExLigth	FEXERGY	Final exergy Lighting (TJ)
FExOelec	FEXERGY	Final exergy Other electric uses (TJ)
FExMusc	FEXERGY	Final exergy Muscle power (TJ)
UWMech_LPG	UE	Useful exergy Mechanical drive _ LPG (TJ)
UWMech_motorgas	UE	Useful exergy Mechanical drive _ motorgas (TJ)
UWMech_avigas	UE	Useful exergy Mechanical drive _ avigas (TJ)
UWMech_diesel	UE	Useful exergy Mechanical drive _ diesel (TJ)
UWMech_fueloil	UE	Useful exergy Mechanical drive _ fueloil (TJ)
UWMech_ngas	UE	Useful exergy Mechanical drive _ natural gas (TJ)
UWMech_elec	UE	Useful exergy Mechanical drive _ electricity (TJ)
UWHeatHigh_oilp	UE	Useful exergy High temperature heat _ oil and oil products (TJ)
UWHeatHigh_coalcp	UE	Useful exergy High temperature heat _ coal and coal products (TJ)
UWHeatHigh_ngas	UE	Useful exergy High temperature heat _ natural gas (TJ)
UWHeatHigh_elec	UE	Useful exergy High temperature heat _ electricity (TJ)
UWHeatMed_oilp	UE	Useful exergy Medium temperature heat _ oil and oil products (TJ)
UWHeatMed_coalcp	UE	Useful exergy Medium temperature heat _ coal and coal products (TJ)
UWHeatMed_ngas	UE	Useful exergy Medium temperature heat _ natural gas (TJ)
UWHeatMed_elec	UE	Useful exergy Medium temperature heat _ electricity (TJ)
UWHeatLow_oilp	UE	Useful exergy Low temperature heat _ oil and oil products (TJ)
UWHeatLow_coalcp	UE	Useful exergy Low temperature heat _ coal and coal products (TJ)
UWHeatLow_ngas	UE	Useful exergy Low temperature heat _ natural gas (TJ)
UWHeatLow_combrenew	UE	Useful exergy Low temperature heat _ combustible renewables (TJ)
UWHeatLow_elec	UE	Useful exergy Low temperature heat _ electricity (TJ)
UWHeatLow_ononconv	UE	Useful exergy Low temperature heat _ other non conventional (TJ)
UWLight-keros	UE	Useful exergy Lighting _ kerosene (TJ)
UWLight_elec	UE	Useful exergy Lighting _ electricity (TJ)
UWOelec	UE	Useful exergy Other electric uses _ electricity (TJ)
UWOil	UE	Useful exergy Oil and oil products (TJ)
UWCoal	UE	Useful exergy Coal and coal products (TJ)
UWGas	UE	Useful exergy Natural gas (TJ)
UWCombRen	UE	Useful exergy Combustible renewables (TJ)
UWElec	UE	Useful exergy Electricity (TJ)
UWFoFe	UE	Useful exergy Food and feed (TJ)
UWONonConv	UE	Useful exergy Other non conventional (TJ)
UWTotal	UE	Useful exergy Total (TJ)
UWMech	UE	Useful exergy Mechanical drive (TJ)
UWHeatHigh	UE	Useful exergy High temperature heat (TJ)
UWHeatMed	UE	Useful exergy Medium temperature heat (TJ)
UWHeatLow	UE	Useful exergy Low temperature heat (TJ)
UWLigth	UE	Useful exergy Lighting (TJ)
UWOelec	UE	Useful exergy Other electric uses (TJ)
UWMusc	UE	Useful exergy Muscle power (TJ)
EffOil	FTUEFF	Final-to-useful second-law efficiency Mechanical drive (TJ)
EffCoal	FTUEFF	Final-to-useful second-law efficiency High temperature heat (TJ)
EffGas	FTUEFF	Final-to-useful second-law efficiency Medium temperature heat (TJ)
EffCombRen	FTUEFF	Final-to-useful second-law efficiency Low temperature heat (TJ)
EffElec	FTUEFF	Final-to-useful second-law efficiency Heat total (TJ)
EffFoFe	FTUEFF	Final-to-useful second-law efficiency Lighting (TJ)
EffONonConv	FTUEFF	Final-to-useful second-law efficiency Other electric uses (TJ)
EffTotal	FTUEFF	Final-to-useful second-law efficiency Total (TJ)
EffMech	FTUEFF	Final-to-useful second-law efficiency Mechanical drive (TJ)
EffHeatHigh	FTUEFF	Final-to-useful second-law efficiency High temperature heat (TJ)
EffHeatMed	FTUEFF	Final-to-useful second-law efficiency Medium temperature heat (TJ)
EffHeatLow	FTUEFF	Final-to-useful second-law efficiency Low temperature heat (TJ)
EffLigth	FTUEFF	Final-to-useful second-law efficiency Lighting (TJ)
EffOelec	FTUEFF	Final-to-useful second-law efficiency Other electric uses (TJ)
EffMusc	FTUEFF	Final-to-useful second-law efficiency Muscle power (TJ)
country
sector
year
fencrude
fenrefingas
fenLPG
fenmotorgas
fenavigas
fenkeros
fengasdiesel
fenfueloil
fenbitum
fenpetrocoke
Non specific oil
FEnOil
FEnCoal
FEnNGas
FEnCombRen
FEnElec
FEnFood
FEnONonConv
FEnTotal
fexcrude
fexrefingas
fexLPG
fexmotorgas
fexavigas
fexkeros
fexgasdiesel
fexfueloil
fexbitum
fexpetrocoke
Non specific oil
FExOil
FExCoal
FExNGas
FExCombRen
FExElec
FExFood
FExONonConv
FExTotal
mech_ngas
mech_elec
mech_LPG
mech_motorgas
mech_avigas
mech_gasdiesel
mech_fueloil
htheat_oilp
htheat_coalcp
htheat_ngas
htheat_elec
mtheat_oilp
mtheat_coalcp
mtheat_ngas
mtheat_elec
ltheat_oilp
ltheat_coalcp
ltheat_ngas
ltheat_elec
ltheat_solarwind
ltheat_combrenew
Light-keros
light_elec
FExOelec
Mechanical drive
High Temp. heat
Medium Temp. heat
Low Temp. heat
Lighting
Other Electric
Muscle
UW mech_ngas
UW mech_elec
UW mech_LPG
UW mech_motorgas
UW mech_avigas
UW mech_gasdiesel
UW mech_fueloil
UW htheat_oilp
UW htheat_coalcp
UW htheat_ngas
UW htheat_elec
UW mtheat_oilp
UW mtheat_coalcp
UW mtheat_ngas
UW mtheat_elec
UW ltheat_oilp
UW ltheat_coalcp
UW ltheat_ngas
UW ltheat_elec
UW ltheat_solarwind
UW ltheat_combrenew
UWOelec
UW Light-keros
UW light_elec
UWOil
UWCoal
UWGas
UWCombRen
UWElec
UWFoFe
UWONonConv
UW Total
UW Mechanical drive
UW HTH
UW MTH
UW LTH
UW Lighting
UW OE
UW Muscle
EffOil
EffCoal
EffGas
EffCombRen
EffElec
EffFoFe
EffONonConv
Eff Total
Eff Mechanical drive
EffHTH
EffMTH
EffLTH
EffLighting
EffOE
EffMuscle
country
sector
year
fencrude
fenrefingas
fenLPG
fenmotorgas
fenavigas
fenkeros
fengasdiesel
fenfueloil
fenbitum
fenpetrocoke
Non specific oil
FEnOil
FEnCoal
FEnNGas
FEnCombRen
FEnElec
FEnFood
FEnONonConv
FEnTotal
fexcrude
fexrefingas
fexLPG
fexmotorgas
fexavigas
fexkeros
fexgasdiesel
fexfueloil
fexbitum
fexpetrocoke
Non specific oil
FExOil
FExCoal
FExNGas
FExCombRen
FExElec
FExFood
FExONonConv
FExTotal
mech_ngas
mech_elec
mech_LPG
mech_motorgas
mech_avigas
mech_gasdiesel
mech_fueloil
htheat_oilp
htheat_coalcp
htheat_ngas
htheat_elec
mtheat_oilp
mtheat_coalcp
mtheat_ngas
mtheat_elec
ltheat_oilp
ltheat_coalcp
ltheat_ngas
ltheat_elec
ltheat_solarwind
ltheat_combrenew
Light-keros
light_elec
FExOelec
Mechanical drive
High Temp. heat
Medium Temp. heat
Low Temp. heat
Lighting
Other Electric
Muscle
UW mech_ngas
UW mech_elec
UW mech_LPG
UW mech_motorgas
UW mech_avigas
UW mech_gasdiesel
UW mech_fueloil
UW htheat_oilp
UW htheat_coalcp
UW htheat_ngas
UW htheat_elec
UW mtheat_oilp
UW mtheat_coalcp
UW mtheat_ngas
UW mtheat_elec
UW ltheat_oilp
UW ltheat_coalcp
UW ltheat_ngas
UW ltheat_elec
UW ltheat_solarwind
UW ltheat_combrenew
UWOelec
UW Light-keros
UW light_elec
UWOil
UWCoal
UWGas
UWCombRen
UWElec
UWFoFe
UWONonConv
UW Total
UW Mechanical drive
UW HTH
UW MTH
UW LTH
UW Lighting
UW OE
UW Muscle
EffOil
EffCoal
EffGas
EffCombRen
EffElec
EffFoFe
EffONonConv
Eff Total
Eff Mechanical drive
EffHTH
EffMTH
EffLTH
EffLighting
EffOE
EffMuscle
country
sector
year
fencrude
fenrefingas
fenLPG
fenmotorgas
fenavigas
fenkeros
fengasdiesel
fenfueloil
fenbitum
fenpetrocoke
Non specific oil
FEnOil
FEnCoal
FEnNGas
FEnCombRen
FEnElec
FEnFood
FEnONonConv
FEnTotal
fexcrude
fexrefingas
fexLPG
fexmotorgas
fexavigas
fexkeros
fexgasdiesel
fexfueloil
fexbitum
fexpetrocoke
Non specific oil
FExOil
FExCoal
FExNGas
FExCombRen
FExElec
FExFood
FExONonConv
FExTotal
mech_ngas
mech_elec
mech_LPG
mech_motorgas
mech_avigas
mech_gasdiesel
mech_fueloil
htheat_oilp
htheat_coalcp
htheat_ngas
htheat_elec
mtheat_oilp
mtheat_coalcp
mtheat_ngas
mtheat_elec
ltheat_oilp
ltheat_coalcp
ltheat_ngas
ltheat_elec
ltheat_solarwind
ltheat_combrenew
Light-keros
light_elec
FExOelec
Mechanical drive
High Temp. heat
Medium Temp. heat
Low Temp. heat
Lighting
Other Electric
Muscle
UW mech_ngas
UW mech_elec
UW mech_LPG
UW mech_motorgas
UW mech_avigas
UW mech_gasdiesel
UW mech_fueloil
UW htheat_oilp
UW htheat_coalcp
UW htheat_ngas
UW htheat_elec
UW mtheat_oilp
UW mtheat_coalcp
UW mtheat_ngas
UW mtheat_elec
UW ltheat_oilp
UW ltheat_coalcp
UW ltheat_ngas
UW ltheat_elec
UW ltheat_solarwind
UW ltheat_combrenew
UWOelec
UW Light-keros
UW light_elec
UWOil
UWCoal
UWGas
UWCombRen
UWElec
UWFoFe
UWONonConv
UW Total
UW Mechanical drive
UW HTH
UW MTH
UW LTH
UW Lighting
UW OE
UW Muscle
EffOil
EffCoal
EffGas
EffCombRen
EffElec
EffFoFe
EffONonConv
Eff Total
Eff Mechanical drive
EffHTH
EffMTH
EffLTH
EffLighting
EffOE
EffMuscle
country
sector
year
fencrude
fenrefingas
fenLPG
fenmotorgas
fenavigas
fenkeros
fengasdiesel
fenfueloil
fenbitum
fenpetrocoke
Non specific oil
FEnOil
FEnCoal
FEnNGas
FEnCombRen
FEnElec
FEnFood
FEnONonConv
FEnTotal
fexcrude
fexrefingas
fexLPG
fexmotorgas
fexavigas
fexkeros
fexgasdiesel
fexfueloil
fexbitum
fexpetrocoke
Non specific oil
FExOil
FExCoal
FExNGas
FExCombRen
FExElec
FExFood
FExONonConv
FExTotal
mech_ngas
mech_elec
mech_LPG
mech_motorgas
mech_avigas
mech_gasdiesel
mech_fueloil
htheat_oilp
htheat_coalcp
htheat_ngas
htheat_elec
mtheat_oilp
mtheat_coalcp
mtheat_ngas
mtheat_elec
ltheat_oilp
ltheat_coalcp
ltheat_ngas
ltheat_elec
ltheat_solarwind
ltheat_combrenew
Light-keros
light_elec
FExOelec
Mechanical drive
High Temp. heat
Medium Temp. heat
Low Temp. heat
Lighting
Other Electric
Muscle
UW mech_ngas
UW mech_elec
UW mech_LPG
UW mech_motorgas
UW mech_avigas
UW mech_gasdiesel
UW mech_fueloil
UW htheat_oilp
UW htheat_coalcp
UW htheat_ngas
UW htheat_elec
UW mtheat_oilp
UW mtheat_coalcp
UW mtheat_ngas
UW mtheat_elec
UW ltheat_oilp
UW ltheat_coalcp
UW ltheat_ngas
UW ltheat_elec
UW ltheat_solarwind
UW ltheat_combrenew
UWOelec
UW Light-keros
UW light_elec
UWOil
UWCoal
UWGas
UWCombRen
UWElec
UWFoFe
UWONonConv
UW Total
UW Mechanical drive
UW HTH
UW MTH
UW LTH
UW Lighting
UW OE
UW Muscle
EffOil
EffCoal
EffGas
EffCombRen
EffElec
EffFoFe
EffONonConv
Eff Total
Eff Mechanical drive
EffHTH
EffMTH
EffLTH
EffLighting
EffOE
EffMuscle
country
sector
year
fencrude
fenrefingas
fenLPG
fenmotorgas
fenavigas
fenkeros
fengasdiesel
fenfueloil
fenbitum
fenpetrocoke
Non specific oil
FEnOil
FEnCoal
FEnNGas
FEnCombRen
FEnElec
FEnFood
FEnONonConv
FEnTotal
fexcrude
fexrefingas
fexLPG
fexmotorgas
fexavigas
fexkeros
fexgasdiesel
fexfueloil
fexbitum
fexpetrocoke
Non specific oil
FExOil
FExCoal
FExNGas
FExCombRen
FExElec
FExFood
FExONonConv
FExTotal
mech_ngas
mech_elec
mech_LPG
mech_motorgas
mech_avigas
mech_gasdiesel
mech_fueloil
htheat_oilp
htheat_coalcp
htheat_ngas
htheat_elec
mtheat_oilp
mtheat_coalcp
mtheat_ngas
mtheat_elec
ltheat_oilp
ltheat_coalcp
ltheat_ngas
ltheat_elec
ltheat_solarwind
ltheat_combrenew
Light-keros
light_elec
FExOelec
Mechanical drive
High Temp. heat
Medium Temp. heat
Low Temp. heat
Lighting
Other Electric
Muscle
UW mech_ngas
UW mech_elec
UW mech_LPG
UW mech_motorgas
UW mech_avigas
UW mech_gasdiesel
UW mech_fueloil
UW htheat_oilp
UW htheat_coalcp
UW htheat_ngas
UW htheat_elec
UW mtheat_oilp
UW mtheat_coalcp
UW mtheat_ngas
UW mtheat_elec
UW ltheat_oilp
UW ltheat_coalcp
UW ltheat_ngas
UW ltheat_elec
UW ltheat_solarwind
UW ltheat_combrenew
UWOelec
UW Light-keros
UW light_elec
UWOil
UWCoal
UWGas
UWCombRen
UWElec
UWFoFe
UWONonConv
UW Total
UW Mechanical drive
UW HTH
UW MTH
UW LTH
UW Lighting
UW OE
UW Muscle
EffOil
EffCoal
EffGas
EffCombRen
EffElec
EffFoFe
EffONonConv
Eff Total
Eff Mechanical drive
EffHTH
EffMTH
EffLTH
EffLighting
EffOE
EffMuscle
country
sector
year
fencrude
fenrefingas
fenLPG
fenmotorgas
fenavigas
fenkeros
fengasdiesel
fenfueloil
fenbitum
fenpetrocoke
Non specific oil
FEnOil
FEnCoal
FEnNGas
FEnCombRen
FEnElec
FEnFood
FEnONonConv
FEnTotal
fexcrude
fexrefingas
fexLPG
fexmotorgas
fexavigas
fexkeros
fexgasdiesel
fexfueloil
fexbitum
fexpetrocoke
Non specific oil
FExOil
FExCoal
FExNGas
FExCombRen
FExElec
FExFood
FExONonConv
FExTotal
mech_ngas
mech_elec
mech_LPG
mech_motorgas
mech_avigas
mech_gasdiesel
mech_fueloil
htheat_oilp
htheat_coalcp
htheat_ngas
htheat_elec
mtheat_oilp
mtheat_coalcp
mtheat_ngas
mtheat_elec
ltheat_oilp
ltheat_coalcp
ltheat_ngas
ltheat_elec
ltheat_solarwind
ltheat_combrenew
Light-keros
light_elec
FExOelec
Mechanical drive
High Temp. heat
Medium Temp. heat
Low Temp. heat
Lighting
Other Electric
Muscle
UW mech_ngas
UW mech_elec
UW mech_LPG
UW mech_motorgas
UW mech_avigas
UW mech_gasdiesel
UW mech_fueloil
UW htheat_oilp
UW htheat_coalcp
UW htheat_ngas
UW htheat_elec
UW mtheat_oilp
UW mtheat_coalcp
UW mtheat_ngas
UW mtheat_elec
UW ltheat_oilp
UW ltheat_coalcp
UW ltheat_ngas
UW ltheat_elec
UW ltheat_solarwind
UW ltheat_combrenew
UWOelec
UW Light-keros
UW light_elec
UWOil
UWCoal
UWGas
UWCombRen
UWElec
UWFoFe
UWONonConv
UW Total
UW Mechanical drive
UW HTH
UW MTH
UW LTH
UW Lighting
UW OE
UW Muscle
EffOil
EffCoal
EffGas
EffCombRen
EffElec
EffFoFe
EffONonConv
Eff Total
Eff Mechanical drive
EffHTH
EffMTH
EffLTH
EffLighting
EffOE
EffMuscle
country
sector
year
fencrude
fenrefingas
fenLPG
fenmotorgas
fenavigas
fenkeros
fengasdiesel
fenfueloil
fenbitum
fenpetrocoke
Non specific oil
FEnOil
FEnCoal
FEnNGas
FEnCombRen
FEnElec
FEnFood
FEnONonConv
FEnTotal
fexcrude
fexrefingas
fexLPG
fexmotorgas
fexavigas
fexkeros
fexgasdiesel
fexfueloil
fexbitum
fexpetrocoke
Non specific oil
FExOil
FExCoal
FExNGas
FExCombRen
FExElec
FExFood
FExONonConv
FExTotal
mech_ngas
mech_elec
mech_LPG
mech_motorgas
mech_avigas
mech_gasdiesel
mech_fueloil
htheat_oilp
htheat_coalcp
htheat_ngas
htheat_elec
mtheat_oilp
mtheat_coalcp
mtheat_ngas
mtheat_elec
ltheat_oilp
ltheat_coalcp
ltheat_ngas
ltheat_elec
ltheat_solarwind
ltheat_combrenew
Light-keros
light_elec
FExOelec
Mechanical drive
High Temp. heat
Medium Temp. heat
Low Temp. heat
Lighting
Other Electric
Muscle
UW mech_ngas
UW mech_elec
UW mech_LPG
UW mech_motorgas
UW mech_avigas
UW mech_gasdiesel
UW mech_fueloil
UW htheat_oilp
UW htheat_coalcp
UW htheat_ngas
UW htheat_elec
UW mtheat_oilp
UW mtheat_coalcp
UW mtheat_ngas
UW mtheat_elec
UW ltheat_oilp
UW ltheat_coalcp
UW ltheat_ngas
UW ltheat_elec
UW ltheat_solarwind
UW ltheat_combrenew
UWOelec
UW Light-keros
UW light_elec
UWOil
UWCoal
UWGas
UWCombRen
UWElec
UWFoFe
UWONonConv
UW Total
UW Mechanical drive
UW HTH
UW MTH
UW LTH
UW Lighting
UW OE
UW Muscle
EffOil
EffCoal
EffGas
EffCombRen
EffElec
EffFoFe
EffONonConv
Eff Total
Eff Mechanical drive
EffHTH
EffMTH
EffLTH
EffLighting
EffOE
EffMuscle
country
sector
year
fencrude
fenrefingas
fenLPG
fenmotorgas
fenavigas
fenkeros
fengasdiesel
fenfueloil
fenbitum
fenpetrocoke
Non specific oil
FEnOil
FEnCoal
FEnNGas
FEnCombRen
FEnElec
FEnFood
FEnONonConv
FEnTotal
fexcrude
fexrefingas
fexLPG
fexmotorgas
fexavigas
fexkeros
fexgasdiesel
fexfueloil
fexbitum
fexpetrocoke
Non specific oil
FExOil
FExCoal
FExNGas
FExCombRen
FExElec
FExFood
FExONonConv
FExTotal
mech_ngas
mech_elec
mech_LPG
mech_motorgas
mech_avigas
mech_gasdiesel
mech_fueloil
htheat_oilp
htheat_coalcp
htheat_ngas
htheat_elec
mtheat_oilp
mtheat_coalcp
mtheat_ngas
mtheat_elec
ltheat_oilp
ltheat_coalcp
ltheat_ngas
ltheat_elec
ltheat_solarwind
ltheat_combrenew
Light-keros
light_elec
FExOelec
Mechanical drive
High Temp. heat
Medium Temp. heat
Low Temp. heat
Lighting
Other Electric
Muscle
UW mech_ngas
UW mech_elec
UW mech_LPG
UW mech_motorgas
UW mech_avigas
UW mech_gasdiesel
UW mech_fueloil
UW htheat_oilp
UW htheat_coalcp
UW htheat_ngas
UW htheat_elec
UW mtheat_oilp
UW mtheat_coalcp
UW mtheat_ngas
UW mtheat_elec
UW ltheat_oilp
UW ltheat_coalcp
UW ltheat_ngas
UW ltheat_elec
UW ltheat_solarwind
UW ltheat_combrenew
UWOelec
UW Light-keros
UW light_elec
UWOil
UWCoal
UWGas
UWCombRen
UWElec
UWFoFe
UWONonConv
UW Total
UW Mechanical drive
UW HTH
UW MTH
UW LTH
UW Lighting
UW OE
UW Muscle
EffOil
EffCoal
EffGas
EffCombRen
EffElec
EffFoFe
EffONonConv
Eff Total
Eff Mechanical drive
EffHTH
EffMTH
EffLTH
EffLighting
EffOE
EffMuscle
country
sector
year
fencrude
fenrefingas
fenLPG
fenmotorgas
fenavigas
fenkeros
fengasdiesel
fenfueloil
fenbitum
fenpetrocoke
Non specific oil
FEnOil
FEnCoal
FEnNGas
FEnCombRen
FEnElec
FEnFood
FEnONonConv
FEnTotal
fexcrude
fexrefingas
fexLPG
fexmotorgas
fexavigas
fexkeros
fexgasdiesel
fexfueloil
fexbitum
fexpetrocoke
Non specific oil
FExOil
FExCoal
FExNGas
FExCombRen
FExElec
FExFood
FExONonConv
FExTotal
mech_ngas
mech_elec
mech_LPG
mech_motorgas
mech_avigas
mech_gasdiesel
mech_fueloil
htheat_oilp
htheat_coalcp
htheat_ngas
htheat_elec
mtheat_oilp
mtheat_coalcp
mtheat_ngas
mtheat_elec
ltheat_oilp
ltheat_coalcp
ltheat_ngas
ltheat_elec
ltheat_solarwind
ltheat_combrenew
Light-keros
light_elec
FExOelec
Mechanical drive
High Temp. heat
Medium Temp. heat
Low Temp. heat
Lighting
Other Electric
Muscle
UW mech_ngas
UW mech_elec
UW mech_LPG
UW mech_motorgas
UW mech_avigas
UW mech_gasdiesel
UW mech_fueloil
UW htheat_oilp
UW htheat_coalcp
UW htheat_ngas
UW htheat_elec
UW mtheat_oilp
UW mtheat_coalcp
UW mtheat_ngas
UW mtheat_elec
UW ltheat_oilp
UW ltheat_coalcp
UW ltheat_ngas
UW ltheat_elec
UW ltheat_solarwind
UW ltheat_combrenew
UWOelec
UW Light-keros
UW light_elec
UWOil
UWCoal
UWGas
UWCombRen
UWElec
UWFoFe
UWONonConv
UW Total
UW Mechanical drive
UW HTH
UW MTH
UW LTH
UW Lighting
UW OE
UW Muscle
EffOil
EffCoal
EffGas
EffCombRen
EffElec
EffFoFe
EffONonConv
Eff Total
Eff Mechanical drive
EffHTH
EffMTH
EffLTH
EffLighting
EffOE
EffMuscle
country
sector
year
fencrude
fenrefingas
fenLPG
fenmotorgas
fenavigas
fenkeros
fengasdiesel
fenfueloil
fenbitum
fenpetrocoke
Non specific oil
FEnOil
FEnCoal
FEnNGas
FEnCombRen
FEnElec
FEnFood
FEnONonConv
FEnTotal
fexcrude
fexrefingas
fexLPG
fexmotorgas
fexavigas
fexkeros
fexgasdiesel
fexfueloil
fexbitum
fexpetrocoke
Non specific oil
FExOil
FExCoal
FExNGas
FExCombRen
FExElec
FExFood
FExONonConv
FExTotal
mech_ngas
mech_elec
mech_LPG
mech_motorgas
mech_avigas
mech_gasdiesel
mech_fueloil
htheat_oilp
htheat_coalcp
htheat_ngas
htheat_elec
mtheat_oilp
mtheat_coalcp
mtheat_ngas
mtheat_elec
ltheat_oilp
ltheat_coalcp
ltheat_ngas
ltheat_elec
ltheat_solarwind
ltheat_combrenew
Light-keros
light_elec
FExOelec
Mechanical drive
High Temp. heat
Medium Temp. heat
Low Temp. heat
Lighting
Other Electric
Muscle
UW mech_ngas
UW mech_elec
UW mech_LPG
UW mech_motorgas
UW mech_avigas
UW mech_gasdiesel
UW mech_fueloil
UW htheat_oilp
UW htheat_coalcp
UW htheat_ngas
UW htheat_elec
UW mtheat_oilp
UW mtheat_coalcp
UW mtheat_ngas
UW mtheat_elec
UW ltheat_oilp
UW ltheat_coalcp
UW ltheat_ngas
UW ltheat_elec
UW ltheat_solarwind
UW ltheat_combrenew
UWOelec
UW Light-keros
UW light_elec
UWOil
UWCoal
UWGas
UWCombRen
UWElec
UWFoFe
UWONonConv
UW Total
UW Mechanical drive
UW HTH
UW MTH
UW LTH
UW Lighting
UW OE
UW Muscle
EffOil
EffCoal
EffGas
EffCombRen
EffElec
EffFoFe
EffONonConv
Eff Total
Eff Mechanical drive
EffHTH
EffMTH
EffLTH
EffLighting
EffOE
EffMuscle
country
sector
year
fencrude
fenrefingas
fenLPG
fenmotorgas
fenavigas
fenkeros
fengasdiesel
fenfueloil
fenbitum
fenpetrocoke
Non specific oil
FEnOil
FEnCoal
FEnNGas
FEnCombRen
FEnElec
FEnFood
FEnONonConv
FEnTotal
fexcrude
fexrefingas
fexLPG
fexmotorgas
fexavigas
fexkeros
fexgasdiesel
fexfueloil
fexbitum
fexpetrocoke
Non specific oil
FExOil
FExCoal
FExNGas
FExCombRen
FExElec
FExFood
FExONonConv
FExTotal
mech_ngas
mech_elec
mech_LPG
mech_motorgas
mech_avigas
mech_gasdiesel
mech_fueloil
htheat_oilp
htheat_coalcp
htheat_ngas
htheat_elec
mtheat_oilp
mtheat_coalcp
mtheat_ngas
mtheat_elec
ltheat_oilp
ltheat_coalcp
ltheat_ngas
ltheat_elec
ltheat_solarwind
ltheat_combrenew
Light-keros
light_elec
FExOelec
Mechanical drive
High Temp. heat
Medium Temp. heat
Low Temp. heat
Lighting
Other Electric
Muscle
UW mech_ngas
UW mech_elec
UW mech_LPG
UW mech_motorgas
UW mech_avigas
UW mech_gasdiesel
UW mech_fueloil
UW htheat_oilp
UW htheat_coalcp
UW htheat_ngas
UW htheat_elec
UW mtheat_oilp
UW mtheat_coalcp
UW mtheat_ngas
UW mtheat_elec
UW ltheat_oilp
UW ltheat_coalcp
UW ltheat_ngas
UW ltheat_elec
UW ltheat_solarwind
UW ltheat_combrenew
UWOelec
UW Light-keros
UW light_elec
UWOil
UWCoal
UWGas
UWCombRen
UWElec
UWFoFe
UWONonConv
UW Total
UW Mechanical drive
UW HTH
UW MTH
UW LTH
UW Lighting
UW OE
UW Muscle
EffOil
EffCoal
EffGas
EffCombRen
EffElec
EffFoFe
EffONonConv
Eff Total
Eff Mechanical drive
EffHTH
EffMTH
EffLTH
EffLighting
EffOE
EffMuscle
country
sector
year
fencrude
fenrefingas
fenLPG
fenmotorgas
fenavigas
fenkeros
fengasdiesel
fenfueloil
fenbitum
fenpetrocoke
Non specific oil
FEnOil
FEnCoal
FEnNGas
FEnCombRen
FEnElec
FEnFood
FEnONonConv
FEnTotal
fexcrude
fexrefingas
fexLPG
fexmotorgas
fexavigas
fexkeros
fexgasdiesel
fexfueloil
fexbitum
fexpetrocoke
Non specific oil
FExOil
FExCoal
FExNGas
FExCombRen
FExElec
FExFood
FExONonConv
FExTotal
mech_ngas
mech_elec
mech_LPG
mech_motorgas
mech_avigas
mech_gasdiesel
mech_fueloil
htheat_oilp
htheat_coalcp
htheat_ngas
htheat_elec
mtheat_oilp
mtheat_coalcp
mtheat_ngas
mtheat_elec
ltheat_oilp
ltheat_coalcp
ltheat_ngas
ltheat_elec
ltheat_solarwind
ltheat_combrenew
Light-keros
light_elec
FExOelec
Mechanical drive
High Temp. heat
Medium Temp. heat
Low Temp. heat
Lighting
Other Electric
Muscle
UW mech_ngas
UW mech_elec
UW mech_LPG
UW mech_motorgas
UW mech_avigas
UW mech_gasdiesel
UW mech_fueloil
UW htheat_oilp
UW htheat_coalcp
UW htheat_ngas
UW htheat_elec
UW mtheat_oilp
UW mtheat_coalcp
UW mtheat_ngas
UW mtheat_elec
UW ltheat_oilp
UW ltheat_coalcp
UW ltheat_ngas
UW ltheat_elec
UW ltheat_solarwind
UW ltheat_combrenew
UWOelec
UW Light-keros
UW light_elec
UWOil
UWCoal
UWGas
UWCombRen
UWElec
UWFoFe
UWONonConv
UW Total
UW Mechanical drive
UW HTH
UW MTH
UW LTH
UW Lighting
UW OE
UW Muscle
EffOil
EffCoal
EffGas
EffCombRen
EffElec
EffFoFe
EffONonConv
Eff Total
Eff Mechanical drive
EffHTH
EffMTH
EffLTH
EffLighting
EffOE
EffMuscle
country
sector
year
fencrude
fenrefingas
fenLPG
fenmotorgas
fenavigas
fenkeros
fengasdiesel
fenfueloil
fenbitum
fenpetrocoke
Non specific oil
FEnOil
FEnCoal
FEnNGas
FEnCombRen
FEnElec
FEnFood
FEnONonConv
FEnTotal
fexcrude
fexrefingas
fexLPG
fexmotorgas
fexavigas
fexkeros
fexgasdiesel
fexfueloil
fexbitum
fexpetrocoke
Non specific oil
FExOil
FExCoal
FExNGas
FExCombRen
FExElec
FExFood
FExONonConv
FExTotal
mech_ngas
mech_elec
mech_LPG
mech_motorgas
mech_avigas
mech_gasdiesel
mech_fueloil
htheat_oilp
htheat_coalcp
htheat_ngas
htheat_elec
mtheat_oilp
mtheat_coalcp
mtheat_ngas
mtheat_elec
ltheat_oilp
ltheat_coalcp
ltheat_ngas
ltheat_elec
ltheat_solarwind
ltheat_combrenew
Light-keros
light_elec
FExOelec
Mechanical drive
High Temp. heat
Medium Temp. heat
Low Temp. heat
Lighting
Other Electric
Muscle
UW mech_ngas
UW mech_elec
UW mech_LPG
UW mech_motorgas
UW mech_avigas
UW mech_gasdiesel
UW mech_fueloil
UW htheat_oilp
UW htheat_coalcp
UW htheat_ngas
UW htheat_elec
UW mtheat_oilp
UW mtheat_coalcp
UW mtheat_ngas
UW mtheat_elec
UW ltheat_oilp
UW ltheat_coalcp
UW ltheat_ngas
UW ltheat_elec
UW ltheat_solarwind
UW ltheat_combrenew
UWOelec
UW Light-keros
UW light_elec
UWOil
UWCoal
UWGas
UWCombRen
UWElec
UWFoFe
UWONonConv
UW Total
UW Mechanical drive
UW HTH
UW MTH
UW LTH
UW Lighting
UW OE
UW Muscle
EffOil
EffCoal
EffGas
EffCombRen
EffElec
EffFoFe
EffONonConv
Eff Total
Eff Mechanical drive
EffHTH
EffMTH
EffLTH
EffLighting
EffOE
EffMuscle
country
sector
year
fencrude
fenrefingas
fenLPG
fenmotorgas
fenavigas
fenkeros
fengasdiesel
fenfueloil
fenbitum
fenpetrocoke
Non specific oil
FEnOil
FEnCoal
FEnNGas
FEnCombRen
FEnElec
FEnFood
FEnONonConv
FEnTotal
fexcrude
fexrefingas
fexLPG
fexmotorgas
fexavigas
fexkeros
fexgasdiesel
fexfueloil
fexbitum
fexpetrocoke
Non specific oil
FExOil
FExCoal
FExNGas
FExCombRen
FExElec
FExFood
FExONonConv
FExTotal
mech_ngas
mech_elec
mech_LPG
mech_motorgas
mech_avigas
mech_gasdiesel
mech_fueloil
htheat_oilp
htheat_coalcp
htheat_ngas
htheat_elec
mtheat_oilp
mtheat_coalcp
mtheat_ngas
mtheat_elec
ltheat_oilp
ltheat_coalcp
ltheat_ngas
ltheat_elec
ltheat_solarwind
ltheat_combrenew
Light-keros
light_elec
FExOelec
Mechanical drive
High Temp. heat
Medium Temp. heat
Low Temp. heat
Lighting
Other Electric
Muscle
UW mech_ngas
UW mech_elec
UW mech_LPG
UW mech_motorgas
UW mech_avigas
UW mech_gasdiesel
UW mech_fueloil
UW htheat_oilp
UW htheat_coalcp
UW htheat_ngas
UW htheat_elec
UW mtheat_oilp
UW mtheat_coalcp
UW mtheat_ngas
UW mtheat_elec
UW ltheat_oilp
UW ltheat_coalcp
UW ltheat_ngas
UW ltheat_elec
UW ltheat_solarwind
UW ltheat_combrenew
UWOelec
UW Light-keros
UW light_elec
UWOil
UWCoal
UWGas
UWCombRen
UWElec
UWFoFe
UWONonConv
UW Total
UW Mechanical drive
UW HTH
UW MTH
UW LTH
UW Lighting
UW OE
UW Muscle
EffOil
EffCoal
EffGas
EffCombRen
EffElec
EffFoFe
EffONonConv
Eff Total
Eff Mechanical drive
EffHTH
EffMTH
EffLTH
EffLighting
EffOE
EffMuscle
country
sector
year
fencrude
fenrefingas
fenLPG
fenmotorgas
fenavigas
fenkeros
fengasdiesel
fenfueloil
fenbitum
fenpetrocoke
Non specific oil
FEnOil
FEnCoal
FEnNGas
FEnCombRen
FEnElec
FEnFood
FEnONonConv
FEnTotal
fexcrude
fexrefingas
fexLPG
fexmotorgas
fexavigas
fexkeros
fexgasdiesel
fexfueloil
fexbitum
fexpetrocoke
Non specific oil
FExOil
FExCoal
FExNGas
FExCombRen
FExElec
FExFood
FExONonConv
FExTotal
mech_ngas
mech_elec
mech_LPG
mech_motorgas
mech_avigas
mech_gasdiesel
mech_fueloil
htheat_oilp
htheat_coalcp
htheat_ngas
htheat_elec
mtheat_oilp
mtheat_coalcp
mtheat_ngas
mtheat_elec
ltheat_oilp
ltheat_coalcp
ltheat_ngas
ltheat_elec
ltheat_solarwind
ltheat_combrenew
Light-keros
light_elec
FExOelec
Mechanical drive
High Temp. heat
Medium Temp. heat
Low Temp. heat
Lighting
Other Electric
Muscle
UW mech_ngas
UW mech_elec
UW mech_LPG
UW mech_motorgas
UW mech_avigas
UW mech_gasdiesel
UW mech_fueloil
UW htheat_oilp
UW htheat_coalcp
UW htheat_ngas
UW htheat_elec
UW mtheat_oilp
UW mtheat_coalcp
UW mtheat_ngas
UW mtheat_elec
UW ltheat_oilp
UW ltheat_coalcp
UW ltheat_ngas
UW ltheat_elec
UW ltheat_solarwind
UW ltheat_combrenew
UWOelec
UW Light-keros
UW light_elec
UWOil
UWCoal
UWGas
UWCombRen
UWElec
UWFoFe
UWONonConv
UW Total
UW Mechanical drive
UW HTH
UW MTH
UW LTH
UW Lighting
UW OE
UW Muscle
EffOil
[truncated: 6,062 more rows]

## Sheet: UEAggregate
country	sector	year	FEnOil	FEnCoal	FEnNGas	FEnCombRen	FEnElec	FEnFoFe	FEnONonConv	FEnTotal	FExOil	FExCoal	FExNGas	FExCombRen	FExElec	FExFood	FExFeed	FExFoFe	FExONonConv	FExTotal	FExMech1	FExMech2	FExMech3	FExMech	FExHeatHigh	FExHeatMed	FExHeatLow1	FExHeatLow2	FExHeatLow3	FExHeatLow	FExHeat	FExLigth	FExOelec	FExMusc	UWOil	UWCoal	UWGas	UWCombRen	UWElec	UWFoFe	UWONonConv	UWTotal	UWMech	UWHeatHigh	UWHeatMed	UWHeatLow	UWHeat	UWLigth	UWOelec
MEX	AGGR	1971	816063	46989.5	249561	250005	87832.4	192381	0	1.64283e+06	865027	49808.8	259543	277505	87832.4	NA	NA	213543	0	1.75326e+06	NA	NA	NA	633821	200195	184441	NA	NA	NA	450653	835290	52158.5	18447.4	213543	86156.3	9812.12	35350.2	7941.42	47857.6	44599.6	0	231717	109261	39201.2	15541.9	12903.5	67646.6	1461.72	8748.74
MEX	AGGR	1972	932849	52549	275597	251337	98358.6	201260	0	1.81195e+06	988820	55701.9	286621	278984	98358.6	NA	NA	223398	0	1.93188e+06	NA	NA	NA	703052	221625	245326	NA	NA	NA	461827	928777	55647.4	21009.1	223398	99352	11230.4	39389.9	8030.41	53462.3	46658	0	258123	121845	43792.8	20987.9	13301.5	78082.2	1666.32	9871.55
MEX	AGGR	1973	1.02107e+06	59965	315360	259913	108080	211226	0	1.97561e+06	1.08233e+06	63562.9	327974	288503	108080	NA	NA	234461	0	2.10491e+06	NA	NA	NA	796602	238038	273203	NA	NA	NA	481495	992736	57636.3	23476.8	234461	111443	13085.4	45541.6	8352.71	58743.6	48968.5	0	286135	137610	48801.2	24047.9	13949.2	86798.3	1845.09	10912.4
MEX	AGGR	1974	1.10807e+06	61954.2	337121	264579	125212	218622	0	2.11555e+06	1.17455e+06	65671.4	350606	293683	125212	NA	NA	242670	0	2.25239e+06	NA	NA	NA	896162	256108	272904	NA	NA	NA	494257	1.02327e+06	63129.3	27160.5	242670	123902	13847.3	48747.5	8551.81	68141.2	50683.1	0	313873	158307	52233.1	23605.9	14402.7	90241.7	2165.39	12475.9
MEX	AGGR	1975	1.15078e+06	61282.2	294071	263890	134942	233379	0	2.13835e+06	1.21983e+06	64959.1	305834	292918	134942	NA	NA	259051	0	2.27753e+06	NA	NA	NA	887676	273160	245887	NA	NA	NA	514241	1.03329e+06	67559.1	29958	259051	127897	13965.1	44592.3	8578.57	73284.2	54104.2	0	322421	161909	54963.1	20378.8	15071.6	90413.5	2359.78	13634.4
MEX	AGGR	1976	1.2665e+06	67866.1	289880	264512	147316	233487	0	2.26956e+06	1.34248e+06	71938.1	301475	293608	147316	NA	NA	259171	0	2.41599e+06	NA	NA	NA	979601	294430	251814	NA	NA	NA	526807	1.07305e+06	70434.2	33735.3	259171	143224	15515.3	44404.3	8647.92	79988.4	54129.2	0	345910	179232	58853.1	20302.3	15529.2	94684.7	2579.97	15283.6
MEX	AGGR	1977	1.349e+06	72970.9	311119	268523	160897	245237	0	2.40775e+06	1.42994e+06	77349.2	323564	298061	160897	NA	NA	272213	0	2.56202e+06	NA	NA	NA	1.03294e+06	290410	320376	NA	NA	NA	533279	1.14407e+06	75485.1	37322.1	272213	154684	17047.7	48434.1	8828.94	87340	56853.2	0	373188	192067	60916.9	27974	15810.3	104701	2839.98	16726.6
MEX	AGGR	1978	1.4195e+06	75376.5	369634	281255	178223	257033	0	2.58102e+06	1.50466e+06	79899.1	384419	312193	178223	NA	NA	285306	0	2.74471e+06	NA	NA	NA	1.14117e+06	326265	306469	NA	NA	NA	565102	1.19784e+06	78563.4	41826.3	285306	165752	18187.8	58223	9299.8	96634.5	59587.8	0	407685	213689	69424.3	26452.9	16849	112726	3173.84	18507.7
MEX	AGGR	1979	1.5197e+06	72752.2	461466	288487	193295	265518	0	2.80122e+06	1.61088e+06	77117.3	479925	320220	193295	NA	NA	294725	0	2.97616e+06	NA	NA	NA	1.3177e+06	343586	301511	NA	NA	NA	588918	1.23401e+06	83381.4	46344.7	294725	181079	18425.8	72566.1	9592.5	104410	61554.9	0	447628	242009	75946.9	26675.2	17658.5	120281	3486.52	20296.9
MEX	AGGR	1980	1.71461e+06	66618.5	498117	287912	209153	288845	0	3.06525e+06	1.81748e+06	70615.6	518042	319582	209153	NA	NA	320618	0	3.25549e+06	NA	NA	NA	1.49127e+06	337462	339351	NA	NA	NA	627883	1.3047e+06	88847.2	50057.1	320618	205960	17202.7	79049.9	9626.87	112660	66962.8	0	491462	272126	76857.9	31244.4	18931.7	127034	3844.66	21493.8
MEX	AGGR	1981	1.89089e+06	71359.2	513672	283708	223904	309811	0	3.29334e+06	2.00434e+06	75640.8	534219	314916	223904	NA	NA	343890	0	3.49691e+06	NA	NA	NA	1.61306e+06	370536	393593	NA	NA	NA	630560	1.39469e+06	91486.1	53787	343890	229005	18802.1	84451.2	9565.38	120888	71823.3	0	534535	293772	85843.1	36608	19174.3	141625	4128.46	23185.8
MEX	AGGR	1982	1.90688e+06	68306.4	566570	288658	242947	311487	0	3.38485e+06	2.0213e+06	72404.7	589233	320410	242947	NA	NA	345750	0	3.59204e+06	NA	NA	NA	1.66156e+06	360529	407631	NA	NA	NA	662861	1.43102e+06	96942.2	56770.4	345750	229257	18550	91907.3	9812.67	130707	72211.8	0	552446	306037	86210.3	38850.5	20324.9	145386	4641.47	24170.5
MEX	AGGR	1983	1.73477e+06	71746.7	575483	292245	253573	315962	0	3.24378e+06	1.83886e+06	76051.5	598502	324392	253573	NA	NA	350718	0	3.4421e+06	NA	NA	NA	1.49756e+06	379566	396223	NA	NA	NA	670052	1.44584e+06	87098.7	60884.6	350718	208512	19841.4	96991.9	10016.1	138190	73249.3	0	546801	289696	93390.7	38396	20716.1	152503	4675.42	26677.3
MEX	AGGR	1984	1.78246e+06	65874.5	644242	300296	266832	314638	0	3.37435e+06	1.88941e+06	69827	670012	333329	266832	NA	NA	349249	0	3.57866e+06	NA	NA	NA	1.65683e+06	348526	359369	NA	NA	NA	714283	1.42218e+06	85806.7	64593	349249	216756	18563	102740	10375.7	146627	72942.5	0	568004	316463	87544	35079.2	22265.3	144889	4862.44	28847.6
MEX	AGGR	1985	1.86545e+06	72196.2	682240	300793	284766	322681	0	3.52812e+06	1.97737e+06	76528	709530	333880	284766	NA	NA	358176	0	3.74025e+06	NA	NA	NA	1.75568e+06	377393	353813	NA	NA	NA	747342	1.47855e+06	78662.9	69186.5	358176	228151	20665.3	109322	10476.7	157315	74807	0	600737	336952	95072.7	33957.8	23486.7	152517	5170.48	31290.5
MEX	AGGR	1986	1.89873e+06	68375	543472	308502	295169	323801	0	3.43805e+06	2.01265e+06	72477.5	565211	342437	295169	NA	NA	359419	0	3.64737e+06	NA	NA	NA	1.71357e+06	319476	355318	NA	NA	NA	746114	1.42091e+06	81557.9	71906.5	359419	233935	19872.5	86044.6	10831.1	163322	75066.6	0	589073	335793	81512.8	34861.5	23638.9	140013	5405.87	32794
MEX	AGGR	1987	1.96874e+06	69685.5	520544	319593	313269	316631	0	3.50846e+06	2.08686e+06	73866.6	541366	354748	313269	NA	NA	351460	0	3.72157e+06	NA	NA	NA	1.70709e+06	354698	366102	NA	NA	NA	780719	1.50152e+06	84362.4	77137.4	351460	243940	20989.1	87074.2	11309.5	174218	73404.4	0	610935	343962	91364	35690.6	24935.1	151990	5723.47	35855.1
MEX	AGGR	1988	1.93567e+06	68768.3	533590	310463	330023	325950	0	3.50447e+06	2.05182e+06	72894.4	554934	344614	330023	NA	NA	361804	0	3.71608e+06	NA	NA	NA	1.72593e+06	340435	336920	NA	NA	NA	784297	1.46165e+06	84719.2	81978.8	361804	241048	21073.4	89137.7	11073	184035	75564.8	0	621932	349072	93114.4	34352.8	25252	152719	6032.87	38543.1
MEX	AGGR	1989	2.0886e+06	66866.2	545073	309303	357584	328245	0	3.69567e+06	2.21392e+06	70878.2	566876	343326	357584	NA	NA	364351	0	3.91693e+06	NA	NA	NA	1.84862e+06	356714	389086	NA	NA	NA	782722	1.52852e+06	85329.2	90112.5	364351	267122	20945.9	90953.2	11117.8	199411	76096.8	0	665647	376580	98186.1	39967.5	25406.4	163560	6570.53	42839.6
MEX	AGGR	1990	2.13167e+06	66622.5	589077	358062	374522	333685	726.88	3.85437e+06	2.25957e+06	70619.8	612640	397449	374522	NA	NA	370391	726.88	4.08592e+06	NA	NA	NA	2.03005e+06	374049	302538	NA	NA	NA	834646	1.51123e+06	80043.2	94208.3	370391	277917	20834.6	101498	12970.2	209844	77358.1	188.304	700610	408637	105112	30301.9	27467.8	162882	6822.59	44910.2
MEX	AGGR	1991	2.34941e+06	57931.7	584401	341142	376203	339615	776.86	4.04948e+06	2.49038e+06	61407.6	607777	378668	376203	NA	NA	376972	776.86	4.29218e+06	NA	NA	NA	2.14507e+06	359990	399110	NA	NA	NA	834315	1.59341e+06	76359.1	100365	376972	308771	18442.1	100640	12389	210071	78732.7	201.252	729246	422139	102536	42456.2	27546.9	172539	6736.94	49098.5
MEX	AGGR	1992	2.37152e+06	64739.1	627246	338769	387134	348613	842.8	4.13887e+06	2.51381e+06	68623.5	652336	376033	387134	NA	NA	386960	842.8	4.38574e+06	NA	NA	NA	2.19768e+06	358263	412412	NA	NA	NA	849521	1.6202e+06	77801.5	103105	386960	307769	20805.1	107360	12334.3	215861	80818.7	218.335	745167	431994	102591	44290.6	28139.6	175021	6967.21	50365.3
MEX	AGGR	1993	2.36335e+06	65233.5	653800	333050	401318	358315	950.82	4.17602e+06	2.50515e+06	69147.5	679952	369685	401318	NA	NA	397730	950.82	4.42393e+06	NA	NA	NA	2.15503e+06	357640	485031	NA	NA	NA	844726	1.6874e+06	77284.9	106494	397730	307170	21084.6	111242	12157	223196	83068.1	246.318	758164	431057	103158	53190.6	28088.4	184437	7364	52237.5
MEX	AGGR	1994	2.46815e+06	72316.1	646972	319960	434271	361919	1051.81	4.30464e+06	2.61624e+06	76655.1	672851	355156	434271	NA	NA	401730	1051.81	4.55795e+06	NA	NA	NA	2.23948e+06	374653	497899	NA	NA	NA	845405	1.71796e+06	82821.2	115965	401730	328331	23565.2	110485	11708.9	241275	83903.5	272.48	799541	459324	107917	54551.1	28222.8	190690	8057.58	57565
MEX	AGGR	1995	2.3477e+06	82188.6	645406	330512	445262	362589	1059.81	4.21472e+06	2.48856e+06	87119.9	671222	366869	445262	NA	NA	402474	1059.81	4.46257e+06	NA	NA	NA	2.139e+06	381702	480918	NA	NA	NA	854387	1.71701e+06	84439.4	119654	402474	311725	26997.2	114313	12125.7	247524	84058.9	274.553	797018	447491	114306	54060	28609.1	196976	8307.02	60185.6
MEX	AGGR	1996	2.39046e+06	87418.9	715000	338986	476201	375660	1160.79	4.38489e+06	2.53389e+06	92664	743600	376274	476201	NA	NA	416982	1160.79	4.64077e+06	NA	NA	NA	2.20257e+06	435431	484796	NA	NA	NA	882054	1.80228e+06	88417.9	130514	416982	319643	28880.7	128948	12468.1	266415	87089	300.713	843745	465710	130694	54152.8	29649.2	214496	8751.79	67698.3
MEX	AGGR	1997	2.44545e+06	93578.6	687369	350889	518824	375899	1276.77	4.47329e+06	2.59218e+06	99193.3	714864	389486	518824	NA	NA	417248	1276.77	4.73307e+06	NA	NA	NA	2.25589e+06	441147	488973	NA	NA	NA	895250	1.82537e+06	89897.2	144668	417248	332544	31150.6	125549	12938.5	292186	87144.6	330.758	881844	489292	133757	55223.7	30217.5	219198	9319.36	76890.2
MEX	AGGR	1998	2.55629e+06	94140.5	740700	352527	540586	387544	1434.73	4.67322e+06	2.70967e+06	99788.9	770328	391305	540586	NA	NA	430173	1434.73	4.94328e+06	NA	NA	NA	2.39999e+06	453345	493901	NA	NA	NA	922027	1.86927e+06	93257.7	150586	430173	351038	31483.1	135936	13031.6	303894	89844.1	371.679	925599	518518	139389	56338.2	31245.4	226973	9844.38	80419.4
MEX	AGGR	1999	2.50494e+06	94854	713139	347354	569482	391393	1604.68	4.62276e+06	2.65523e+06	100545	741665	385563	569482	NA	NA	434446	1604.68	4.88854e+06	NA	NA	NA	2.3843e+06	428645	495937	NA	NA	NA	888736	1.81332e+06	97352.9	159125	434446	352710	31948.7	127813	12872.7	320365	90736.4	415.706	936861	530231	132410	56906.8	30279.8	219596	10416.2	85881.4
MEX	AGGR	2000	2.63372e+06	73962.2	882783	342600	613980	404494	1821.63	4.95337e+06	2.79175e+06	78399.9	918094	380286	613980	NA	NA	448988	1821.63	5.23332e+06	NA	NA	NA	2.4802e+06	524636	572186	NA	NA	NA	931544	2.02837e+06	103214	172547	448988	368037	25443.5	169141	12728.3	345852	93773.7	471.909	1.01545e+06	558446	160817	65192	31875.6	257884	11207.8	94136.6
MEX	AGGR	2001	2.58357e+06	65471	832837	315326	627878	418807	2183.58	4.84607e+06	2.73858e+06	69399.2	866150	350012	627878	NA	NA	464876	2183.58	5.11908e+06	NA	NA	NA	2.50552e+06	438108	532919	NA	NA	NA	895032	1.86606e+06	106522	176107	464876	358190	22516.1	149350	11715	352644	97091.9	565.675	992073	562471	133850	60957.4	30733.8	225541	11546.3	95422.3
MEX	AGGR	2002	2.54493e+06	60916.6	915122	309427	642663	426006	2427.55	4.90149e+06	2.69763e+06	64571.6	951727	343463	642663	NA	NA	472867	2427.55	5.17534e+06	NA	NA	NA	2.52401e+06	444902	557480	NA	NA	NA	887058	1.88944e+06	108167	180858	472867	350316	20944.9	167056	11495.8	361431	98760.8	628.878	1.01063e+06	566005	139977	65413.3	30531.2	235921	11721.4	98224.5
MEX	AGGR	2003	2.60383e+06	67551.6	960581	312291	659314	433429	2792.43	5.03979e+06	2.76006e+06	71604.7	999004	346643	659314	NA	NA	481106	2792.43	5.32052e+06	NA	NA	NA	2.58714e+06	465326	624957	NA	NA	NA	870488	1.96077e+06	112703	178800	481106	361891	23241.7	176515	11602.3	371649	100482	723.403	1.0461e+06	586450	147147	74072.1	30049.9	251269	12253.1	95650.4
MEX	AGGR	2004	2.87521e+06	71808.5	1045859	313492	692365	437536	3101.41	5.43937e+06	3.04772e+06	76117	1.08769e+06	347976	692365	NA	NA	485665	3101.41	5.74064e+06	NA	NA	NA	2.89729e+06	519817	652942	NA	NA	NA	881585	2.05434e+06	117009	186329	485665	402993	24595.1	195808	11646.9	392191	101434	803.447	1.12947e+06	643706	164021	77293.5	30498.3	271813	12710.9	99808.1
MEX	AGGR	2005	2.78741e+06	69362.9	1082388	324471	722220	434623	3539.31	5.42402e+06	2.95466e+06	73524.6	1.12568e+06	360162	722220	NA	NA	482431	3539.31	5.72222e+06	NA	NA	NA	2.89151e+06	499582	654850	NA	NA	NA	877332	2.03176e+06	123642	192869	482431	392884	23797.8	198797	12054.8	408534	100758	916.888	1.13774e+06	653289	158849	78013	30464.3	267326	13424.5	102944
MEX	AGGR	2006	2.87385e+06	69754.7	1169111	321372	734584	444368	3947.23	5.61698e+06	3.04628e+06	73940	1.21588e+06	356723	734584	NA	NA	493249	3947.23	5.9246e+06	NA	NA	NA	3.04796e+06	517714	669271	NA	NA	NA	872861	2.05985e+06	126877	196661	493249	408265	23951.7	215914	11939.7	414328	103018	1022.56	1.17844e+06	679541	166787	80352.1	30417.1	277556	13735.2	104589
MEX	AGGR	2007	3.06587e+06	68974.7	1259652	316629	759064	451069	4556.12	5.92581e+06	3.24982e+06	73113.2	1.31004e+06	351458	759064	NA	NA	500687	4556.12	6.24873e+06	NA	NA	NA	3.33553e+06	538589	673725	NA	NA	NA	866818	2.07913e+06	130454	202934	500687	441903	23716	231968	11763.4	428572	104571	1180.3	1.24367e+06	731657	174050	80989.9	30362.8	285403	14141.8	107901
MEX	AGGR	2008	3.31391e+06	68748.5	1271904	318963	770661	455652	5615.92	6.20546e+06	3.51275e+06	72873.4	1.32278e+06	354049	770661	NA	NA	505774	5615.92	6.5445e+06	NA	NA	NA	3.67491e+06	518513	647480	NA	NA	NA	859810	2.0258e+06	132869	205149	505774	481526	23648.4	232405	11850.1	434034	105634	1454.85	1.29055e+06	783443	169616	78484	30370.3	278470	14512.7	108493
MEX	AGGR	2009	3.07241e+06	70188	1222846	303645	766817	451832	6751.68	5.89449e+06	3.25675e+06	74399.3	1.27176e+06	337046	766817	NA	NA	501534	6751.68	6.21506e+06	NA	NA	NA	3.46373e+06	476207	613799	NA	NA	NA	822152	1.91216e+06	136694	200936	501534	441363	24169.3	218740	11281	428980	104748	1749.08	1.23103e+06	746608	156110	74611.7	29351	260073	14931.8	104669
[truncated: 84 more columns]

## Sheet: UEAggregate list
CODE	TYPE	VARIABLE
FEnOil	FENERGY	Final energy Oil and oil products (TJ)
FEnCoal	FENERGY	Final energy Coal and coal products (TJ)
FEnNGas	FENERGY	Final energy Natural gas (TJ)
FEnCombRen	FENERGY	Final energy Combustible renewables (TJ)
FEnElec	FENERGY	Final energy Electricity (TJ)
FEnFoFe	FENERGY	Final energy Food and feed (TJ)
FEnONonConv	FENERGY	Final energy Other non conventional (TJ)
FEnTotal	FENERGY	Final energy Total (TJ)
FExOil	FEXERGY	Final exergy Oil and oil products (TJ)
FExCoal	FEXERGY	Final exergy Coal and coal products (TJ)
FExNGas	FEXERGY	Final exergy Natural gas (TJ)
FExCombRen	FEXERGY	Final exergy Combustible renewables (TJ)
FExElec	FEXERGY	Final exergy Electricity (TJ)
FExFood	FEXERGY	Final exergy Food (TJ)
FExFeed	FEXERGY	Final exergy Feed (TJ)
FExFoFe	FEXERGY	Final exergy Food and feed (TJ)
FExONonConv	FEXERGY	Final exergy Other non conventional (TJ)
FExTotal	FEXERGY	Final exergy Total (TJ)
FExMech1	FEXERGY	Final exergy Mechanical drive Type 1 (TJ)
FExMech2	FEXERGY	Final exergy Mechanical drive Type 2 (TJ)
FExMech3	FEXERGY	Final exergy Mechanical drive Type 3 (TJ)
FExMech	FEXERGY	Final exergy Mechanical drive (TJ)
FExHeatHigh	FEXERGY	Final exergy High temperature heat (TJ)
FExHeatMed	FEXERGY	Final exergy Medium temperature heat (TJ)
FExHeatLow1	FEXERGY	Final exergy Low temperature heat Type 1 (TJ)
FExHeatLow2	FEXERGY	Final exergy Low temperature heat Type 2 (TJ)
FExHeatLow3	FEXERGY	Final exergy Low temperature heat Type 3 (TJ)
FExHeatLow	FEXERGY	Final exergy Low temperature heat (TJ)
FExHeat	FEXERGY	Final exergy Heat total (TJ)
FExLigth	FEXERGY	Final exergy Lighting (TJ)
FExOelec	FEXERGY	Final exergy Other electric uses (TJ)
FExMusc	FEXERGY	Final exergy Muscle power (TJ)
UWOil	UE	Useful exergy Oil and oil products (TJ)
UWCoal	UE	Useful exergy Coal and coal products (TJ)
UWGas	UE	Useful exergy Natural gas (TJ)
UWCombRen	UE	Useful exergy Combustible renewables (TJ)
UWElec	UE	Useful exergy Electricity (TJ)
UWFoFe	UE	Useful exergy Food and feed (TJ)
UWONonConv	UE	Useful exergy Other non conventional (TJ)
UWTotal	UE	Useful exergy Total (TJ)
UWMech	UE	Useful exergy Mechanical drive (TJ)
UWHeatHigh	UE	Useful exergy High temperature heat (TJ)
UWHeatMed	UE	Useful exergy Medium temperature heat (TJ)
UWHeatLow	UE	Useful exergy Low temperature heat (TJ)
UWHeat	UE	Useful exergy heat total (TJ)
UWLigth	UE	Useful exergy Lighting (TJ)
UWOelec	UE	Useful exergy Other electric uses (TJ)
UWMusc	UE	Useful exergy Muscle power (TJ)
EffOil	FTUEFF	Final-to-useful second-law efficiency Mechanical drive (TJ)
EffCoal	FTUEFF	Final-to-useful second-law efficiency High temperature heat (TJ)
EffGas	FTUEFF	Final-to-useful second-law efficiency Medium temperature heat (TJ)
EffCombRen	FTUEFF	Final-to-useful second-law efficiency Low temperature heat (TJ)
EffElec	FTUEFF	Final-to-useful second-law efficiency Heat total (TJ)
EffFoFe	FTUEFF	Final-to-useful second-law efficiency Lighting (TJ)
EffONonConv	FTUEFF	Final-to-useful second-law efficiency Other electric uses (TJ)
EffTotal	FTUEFF	Final-to-useful second-law efficiency Total (TJ)
EffMech	FTUEFF	Final-to-useful second-law efficiency Mechanical drive (TJ)
EffHeatHigh	FTUEFF	Final-to-useful second-law efficiency High temperature heat (TJ)
EffHeatMed	FTUEFF	Final-to-useful second-law efficiency Medium temperature heat (TJ)
EffHeatLow	FTUEFF	Final-to-useful second-law efficiency Low temperature heat (TJ)
EffHeat	FTUEFF	Final-to-useful second-law efficiency Heat total (TJ)
EffLigth	FTUEFF	Final-to-useful second-law efficiency Lighting (TJ)
EffOelec	FTUEFF	Final-to-useful second-law efficiency Other electric uses (TJ)
EffMusc	FTUEFF	Final-to-useful second-law efficiency Muscle power (TJ)
GDPconstIEA	ECON	GDP at PPP (constant 2000 US$)
FExIntensity	FEXINTEN	Final exergy Economic intensity (GJ/2000 USD) --- GDPconstIEA
UWIntensity	UWINTEN	Useful work Economic intensity (GJ/2000 USD) --- GDPconstIEA
FExCapita	FEXERGY	Final exergy per Capita (GJ/cap) --- Population hlth088
UWCapita	UW	Useful work per Capita (GJ/cap) --- Population hlth088
FExCoalM	FEXERGY	Final exergy Coal.mines
FExOilGas	FEXERGY	Final exergy Oil.and.gas.extraction
FExCoke	FEXERGY	Final exergy Coke.ovens
FExOilRef	FEXERGY	Final exergy Oil.refineries
FExCHP	FEXERGY	Final exergy CHP.and.heat.plants
FExNonSpeE	FEXERGY	Final exergy Non.specified.energy
FExIronSteel	FEXERGY	Final exergy Iron.and.steel
FExChem	FEXERGY	Final exergy Chemical.and.petrochemical
FExNonFerr	FEXERGY	Final exergy Non.ferrous.metals
FExNonMet	FEXERGY	Final exergy Non.metallic.minerals
FExTranEqu	FEXERGY	Final exergy Transport.equipment
FExMach	FEXERGY	Final exergy Machinery
FExMin	FEXERGY	Final exergy Mining.and.quarrying
FExFoodTob	FEXERGY	Final exergy Food.and.tobacco
FExPapPulp	FEXERGY	Final exergy Paper.pulp.and.printing
FExConst	FEXERGY	Final exergy Construction
FExTex	FEXERGY	Final exergy Textile.and.leather
FExNonSpeI	FEXERGY	Final exergy Non.specified.indust
FExRoad	FEXERGY	Final exergy Road
FExRail	FEXERGY	Final exergy Rail
FExNav	FEXERGY	Final exergy Domestic.navigation
FExAvi	FEXERGY	Final exergy Domestic.aviation
FExNonSpeT	FEXERGY	Final exergy Non.specified.transp
FExRes	FEXERGY	Final exergy Residential
FExCom	FEXERGY	Final exergy Commerce.and.public.services
FExAgr	FEXERGY	Final exergy Agriculture.forestry
FExNonSpeO	FEXERGY	Final exergy Non.specified
FExESOU	FEXERGY	Final exergy ESOU
FExIndustry	FEXERGY	Final exergy Industry
FExTrans	FEXERGY	Final exergy Transport
FExOther	FEXERGY	Final exergy Other
UWCoalM	UE	Useful exergy Coal.mines
UWOilGas	UE	Useful exergy Oil.and.gas.extraction
UWCoke	UE	Useful exergy Coke.ovens
UWOilRef	UE	Useful exergy Oil.refineries
UWCHP	UE	Useful exergy CHP.and.heat.plants
UWNonSpeE	UE	Useful exergy Non.specified.energy
UWIronSteel	UE	Useful exergy Iron.and.steel
UWChem	UE	Useful exergy Chemical.and.petrochemical
UWNonFerr	UE	Useful exergy Non.ferrous.metals
UWNonMet	UE	Useful exergy Non.metallic.minerals
UWTranEqu	UE	Useful exergy Transport.equipment
UWMach	UE	Useful exergy Machinery
UWMin	UE	Useful exergy Mining.and.quarrying
UWFoodTob	UE	Useful exergy Food.and.tobacco
UWPapPulp	UE	Useful exergy Paper.pulp.and.printing
UWConst	UE	Useful exergy Construction
UWTex	UE	Useful exergy Textile.and.leather
UWNonSpeI	UE	Useful exergy Non.specified.indust
UWRoad	UE	Useful exergy Road
UWRail	UE	Useful exergy Rail
UWNav	UE	Useful exergy Domestic.navigation
UWAvi	UE	Useful exergy Domestic.aviation
UWNonSpeT	UE	Useful exergy Non.specified.transp
UWRes	UE	Useful exergy Residential
UWCom	UE	Useful exergy Commerce.and.public.services
UWAgr	UE	Useful exergy Agriculture.forestry
UWNonSpeO	UE	Useful exergy Non.specified
UWESOU	UE	Useful exergy ESOU
UWIndustry	UE	Useful exergy Industry
UWTrans	UE	Useful exergy Transport
UWOther	UE	Useful exergy Other
